# Supplementary material for: Comparative Life Cycle Transcriptomics Revises Leishmania mexicana Genome Annotation and Links a Chromosome Duplication with Parasitism of Vertebrates
Source: PLoS Pathog. 2015 Oct 9;11(10):e1005186. doi: 10.1371/journal.ppat.1005186 (PMC4599935; doi:10.1371/journal.ppat.1005186)
Supplement: S1 Table — GFF feature record Columns are , , , , , (“.” denotes no score), (“.” denotes not relevant), , [attribute] (XLSX) [file ppat.1005186.s005.xlsx]

## Sheet: Sheet1
LmxM.00	MF_V1	SLAS	14066	14067	.	-	.	ID=LmxM.33.1680_SLAS_5;Promastigote=0;Intracellular_Amastigote=7;Axenic_Amastigote=2;
LmxM.00	MF_V1	SLAS	14103	14104	.	-	.	ID=LmxM.33.1680_SLAS_4;Promastigote=1;Intracellular_Amastigote=22;Axenic_Amastigote=8;
LmxM.00	MF_V1	SLAS	14239	14240	.	-	.	ID=LmxM.33.1680_SLAS_3;Promastigote=14;Intracellular_Amastigote=174;Axenic_Amastigote=150;
LmxM.00	MF_V1	SLAS	14246	14247	.	-	.	ID=LmxM.33.1680_SLAS_2;Promastigote=414;Intracellular_Amastigote=3067;Axenic_Amastigote=2337;
LmxM.00	MF_V1	SLAS	14282	14283	.	-	.	ID=LmxM.33.1680_SLAS_1;Promastigote=2;Intracellular_Amastigote=3;Axenic_Amastigote=6;
LmxM.00	MF_V1	SLAS	22255	22256	.	-	.	ID=LmxM.33.1920c_SLAS_5;Promastigote=1;Intracellular_Amastigote=19;Axenic_Amastigote=13;
LmxM.00	MF_V1	SLAS	22407	22408	.	-	.	ID=LmxM.33.1920c_SLAS_4;Promastigote=5;Intracellular_Amastigote=38;Axenic_Amastigote=30;
LmxM.00	MF_V1	SLAS	22410	22411	.	-	.	ID=LmxM.33.1920c_SLAS_3;Promastigote=0;Intracellular_Amastigote=15;Axenic_Amastigote=12;
LmxM.00	MF_V1	SLAS	22414	22415	.	-	.	ID=LmxM.33.1920c_SLAS_2;Promastigote=70;Intracellular_Amastigote=496;Axenic_Amastigote=373;
LmxM.00	MF_V1	SLAS	22450	22451	.	-	.	ID=LmxM.33.1920c_SLAS_1;Promastigote=5;Intracellular_Amastigote=5;Axenic_Amastigote=9;
LmxM.00	MF_V1	SLAS	24523	24524	.	+	.	ID=LmxM.33.1740_SLAS_1;Promastigote=4;Intracellular_Amastigote=19;Axenic_Amastigote=22;
LmxM.00	MF_V1	SLAS	24791	24792	.	+	.	ID=LmxM.33.1740_SLAS_2;Promastigote=2;Intracellular_Amastigote=38;Axenic_Amastigote=23;
LmxM.00	MF_V1	SLAS	27384	27385	.	+	.	ID=LmxM.33.1730_SLAS_1;Promastigote=10;Intracellular_Amastigote=20;Axenic_Amastigote=31;
LmxM.00	MF_V1	SLAS	27397	27398	.	+	.	ID=LmxM.33.1730_SLAS_2;Promastigote=2;Intracellular_Amastigote=15;Axenic_Amastigote=17;
LmxM.00	MF_V1	SLAS	27446	27447	.	+	.	ID=LmxM.33.1730_SLAS_3;Promastigote=1;Intracellular_Amastigote=8;Axenic_Amastigote=15;
LmxM.00	MF_V1	SLAS	29997	29998	.	+	.	ID=LmxM.33.1720_SLAS_1;Promastigote=3;Intracellular_Amastigote=31;Axenic_Amastigote=24;
LmxM.00	MF_V1	SLAS	30040	30041	.	+	.	ID=LmxM.33.1720_SLAS_2;Promastigote=6;Intracellular_Amastigote=85;Axenic_Amastigote=57;
LmxM.00	MF_V1	SLAS	30266	30267	.	+	.	ID=LmxM.33.1720_SLAS_3;Promastigote=5;Intracellular_Amastigote=52;Axenic_Amastigote=22;
LmxM.00	MF_V1	SLAS	36390	36391	.	+	.	ID=LmxM.33.1820_SLAS_1;Promastigote=3;Intracellular_Amastigote=32;Axenic_Amastigote=21;
LmxM.00	MF_V1	SLAS	36426	36427	.	+	.	ID=LmxM.33.1820_SLAS_2;Promastigote=15;Intracellular_Amastigote=187;Axenic_Amastigote=141;
LmxM.00	MF_V1	SLAS	36430	36431	.	+	.	ID=LmxM.33.1820_SLAS_3;Promastigote=0;Intracellular_Amastigote=9;Axenic_Amastigote=1;
LmxM.00	MF_V1	SLAS	36433	36434	.	+	.	ID=LmxM.33.1820_SLAS_4;Promastigote=1;Intracellular_Amastigote=11;Axenic_Amastigote=5;
LmxM.00	MF_V1	SLAS	39289	39290	.	+	.	ID=LmxM.33.1810_SLAS_1;Promastigote=1;Intracellular_Amastigote=4;Axenic_Amastigote=5;
LmxM.00	MF_V1	SLAS	39301	39302	.	+	.	ID=LmxM.33.1810_SLAS_2;Promastigote=1;Intracellular_Amastigote=5;Axenic_Amastigote=10;
LmxM.00	MF_V1	SLAS	39327	39328	.	+	.	ID=LmxM.33.1810_SLAS_3;Promastigote=0;Intracellular_Amastigote=6;Axenic_Amastigote=3;
LmxM.00	MF_V1	SLAS	42541	42542	.	+	.	ID=LmxM.11.1120_SLAS_1;Promastigote=54;Intracellular_Amastigote=44;Axenic_Amastigote=64;
LmxM.00	MF_V1	SLAS	42560	42561	.	+	.	ID=LmxM.11.1120_SLAS_2;Promastigote=1;Intracellular_Amastigote=6;Axenic_Amastigote=7;
LmxM.00	MF_V1	SLAS	42670	42671	.	+	.	ID=LmxM.11.1120_SLAS_3;Promastigote=3;Intracellular_Amastigote=4;Axenic_Amastigote=7;
LmxM.00	MF_V1	SLAS	45055	45056	.	+	.	ID=LmxM.11.1130partial_SLAS_1;Promastigote=1059;Intracellular_Amastigote=1227;Axenic_Amastigote=1608;
LmxM.00	MF_V1	SLAS	45974	45975	.	+	.	ID=LmxM.30.0960_SLAS_1;Promastigote=9;Intracellular_Amastigote=0;Axenic_Amastigote=3;
LmxM.00	MF_V1	SLAS	48707	48708	.	+	.	ID=LmxM.30.0950_SLAS_1;Promastigote=0;Intracellular_Amastigote=7;Axenic_Amastigote=9;
LmxM.00	MF_V1	SLAS	49702	49703	.	+	.	ID=LmxM.30.0950_SLAS_2;Promastigote=2;Intracellular_Amastigote=7;Axenic_Amastigote=4;
LmxM.00	MF_V1	SLAS	49767	49768	.	+	.	ID=LmxM.30.0950_SLAS_3;Promastigote=2;Intracellular_Amastigote=4;Axenic_Amastigote=7;
LmxM.00	MF_V1	SLAS	49773	49774	.	+	.	ID=LmxM.30.0950_SLAS_4;Promastigote=114;Intracellular_Amastigote=147;Axenic_Amastigote=243;
LmxM.00	MF_V1	SLAS	49777	49778	.	+	.	ID=LmxM.30.0950_SLAS_5;Promastigote=13;Intracellular_Amastigote=8;Axenic_Amastigote=23;
LmxM.00	MF_V1	SLAS	49802	49803	.	+	.	ID=LmxM.30.0950_SLAS_6;Promastigote=3;Intracellular_Amastigote=2;Axenic_Amastigote=5;
LmxM.00	MF_V1	SLAS	52936	52937	.	+	.	ID=LmxM.30.0950_SLAS_7;Promastigote=349;Intracellular_Amastigote=19;Axenic_Amastigote=76;
LmxM.00	MF_V1	SLAS	52938	52939	.	+	.	ID=LmxM.30.0950_SLAS_8;Promastigote=207;Intracellular_Amastigote=29;Axenic_Amastigote=82;
LmxM.00	MF_V1	SLAS	52941	52942	.	+	.	ID=LmxM.30.0950_SLAS_9;Promastigote=1334;Intracellular_Amastigote=150;Axenic_Amastigote=411;
LmxM.00	MF_V1	SLAS	52953	52954	.	+	.	ID=LmxM.30.0950_SLAS_10;Promastigote=61;Intracellular_Amastigote=4;Axenic_Amastigote=23;
LmxM.00	MF_V1	SLAS	53588	53589	.	+	.	ID=LmxM.30.0950_SLAS_11;Promastigote=11;Intracellular_Amastigote=1;Axenic_Amastigote=2;
LmxM.00	MF_V1	SLAS	58215	58216	.	+	.	ID=LmxM.30.1440a_SLAS_1;Promastigote=1;Intracellular_Amastigote=6;Axenic_Amastigote=4;
LmxM.00	MF_V1	SLAS	58275	58276	.	+	.	ID=LmxM.30.1440a_SLAS_2;Promastigote=1;Intracellular_Amastigote=8;Axenic_Amastigote=13;
LmxM.00	MF_V1	SLAS	59268	59269	.	+	.	ID=LmxM.30.1440a_SLAS_3;Promastigote=2;Intracellular_Amastigote=3;Axenic_Amastigote=7;
LmxM.00	MF_V1	SLAS	59339	59340	.	+	.	ID=LmxM.30.1440a_SLAS_4;Promastigote=128;Intracellular_Amastigote=143;Axenic_Amastigote=228;
LmxM.00	MF_V1	SLAS	59343	59344	.	+	.	ID=LmxM.30.1440a_SLAS_5;Promastigote=10;Intracellular_Amastigote=6;Axenic_Amastigote=29;
LmxM.00	MF_V1	SLAS	59368	59369	.	+	.	ID=LmxM.30.1440a_SLAS_6;Promastigote=3;Intracellular_Amastigote=2;Axenic_Amastigote=4;
LmxM.00	MF_V1	SLAS	61171	61172	.	+	.	ID=LmxM.30.1440a_SLAS_7;Promastigote=52;Intracellular_Amastigote=7;Axenic_Amastigote=34;
LmxM.00	MF_V1	SLAS	64851	64852	.	+	.	ID=LmxM.30.0470b_SLAS_1;Promastigote=26;Intracellular_Amastigote=63;Axenic_Amastigote=111;
LmxM.00	MF_V1	SLAS	64872	64873	.	+	.	ID=LmxM.30.0470b_SLAS_2;Promastigote=65;Intracellular_Amastigote=122;Axenic_Amastigote=220;
LmxM.00	MF_V1	SLAS	64879	64880	.	+	.	ID=LmxM.30.0470b_SLAS_3;Promastigote=4;Intracellular_Amastigote=7;Axenic_Amastigote=12;
LmxM.00	MF_V1	SLAS	64903	64904	.	+	.	ID=LmxM.30.0470b_SLAS_4;Promastigote=1;Intracellular_Amastigote=2;Axenic_Amastigote=6;
LmxM.00	MF_V1	SLAS	66154	66155	.	+	.	ID=LmxM.30.0460b_SLAS_1;Promastigote=94;Intracellular_Amastigote=126;Axenic_Amastigote=618;
LmxM.00	MF_V1	SLAS	67440	67441	.	+	.	ID=LmxM.30.0460b_SLAS_2;Promastigote=2;Intracellular_Amastigote=17;Axenic_Amastigote=22;
LmxM.00	MF_V1	SLAS	67446	67447	.	+	.	ID=LmxM.30.0460b_SLAS_3;Promastigote=0;Intracellular_Amastigote=4;Axenic_Amastigote=9;
LmxM.00	MF_V1	SLAS	73356	73357	.	-	.	ID=LmxM.23.0870_SLAS_2;Promastigote=12;Intracellular_Amastigote=3;Axenic_Amastigote=15;
LmxM.00	MF_V1	SLAS	73366	73367	.	-	.	ID=LmxM.23.0870_SLAS_1;Promastigote=476;Intracellular_Amastigote=243;Axenic_Amastigote=431;
LmxM.00	MF_V1	SLAS	77266	77267	.	+	.	ID=LmxM.30.0450g_SLAS_1;Promastigote=3;Intracellular_Amastigote=5;Axenic_Amastigote=25;
LmxM.00	MF_V1	SLAS	77324	77325	.	+	.	ID=LmxM.30.0450g_SLAS_2;Promastigote=67;Intracellular_Amastigote=210;Axenic_Amastigote=361;
LmxM.00	MF_V1	SLAS	79038	79039	.	+	.	ID=LmxM.33.1920d_SLAS_1;Promastigote=0;Intracellular_Amastigote=9;Axenic_Amastigote=10;
LmxM.00	MF_V1	SLAS	81367	81368	.	+	.	ID=LmxM.33.1610_SLAS_1;Promastigote=1;Intracellular_Amastigote=8;Axenic_Amastigote=17;
LmxM.00	MF_V1	SLAS	81373	81374	.	+	.	ID=LmxM.33.1610_SLAS_2;Promastigote=0;Intracellular_Amastigote=3;Axenic_Amastigote=6;
LmxM.00	MF_V1	SLAS	81378	81379	.	+	.	ID=LmxM.33.1610_SLAS_3;Promastigote=1;Intracellular_Amastigote=8;Axenic_Amastigote=4;
LmxM.00	MF_V1	SLAS	81519	81520	.	+	.	ID=LmxM.33.1610_SLAS_4;Promastigote=5;Intracellular_Amastigote=5;Axenic_Amastigote=16;
LmxM.00	MF_V1	SLAS	81950	81951	.	+	.	ID=LmxM.33.1610_SLAS_5;Promastigote=2;Intracellular_Amastigote=12;Axenic_Amastigote=21;
LmxM.00	MF_V1	SLAS	81986	81987	.	+	.	ID=LmxM.33.1610_SLAS_6;Promastigote=32;Intracellular_Amastigote=344;Axenic_Amastigote=406;
LmxM.00	MF_V1	SLAS	81993	81994	.	+	.	ID=LmxM.33.1610_SLAS_7;Promastigote=0;Intracellular_Amastigote=9;Axenic_Amastigote=7;
LmxM.00	MF_V1	SLAS	84893	84894	.	+	.	ID=LmxM.33.1610_SLAS_8;Promastigote=1;Intracellular_Amastigote=4;Axenic_Amastigote=10;
LmxM.00	MF_V1	SLAS	88795	88796	.	+	.	ID=LmxM.33.1600_SLAS_1;Promastigote=3;Intracellular_Amastigote=7;Axenic_Amastigote=9;
LmxM.00	MF_V1	SLAS	88806	88807	.	+	.	ID=LmxM.33.1600_SLAS_2;Promastigote=1;Intracellular_Amastigote=13;Axenic_Amastigote=10;
LmxM.00	MF_V1	SLAS	88842	88843	.	+	.	ID=LmxM.33.1600_SLAS_3;Promastigote=10;Intracellular_Amastigote=69;Axenic_Amastigote=40;
LmxM.00	MF_V1	SLAS	91738	91739	.	+	.	ID=LmxM.33.1590_SLAS_1;Promastigote=1;Intracellular_Amastigote=5;Axenic_Amastigote=11;
LmxM.00	MF_V1	SLAS	99064	99065	.	+	.	ID=LmxM.27.1560a_SLAS_1;Promastigote=82;Intracellular_Amastigote=121;Axenic_Amastigote=180;
LmxM.00	MF_V1	SLAS	99082	99083	.	+	.	ID=LmxM.27.1560a_SLAS_2;Promastigote=1;Intracellular_Amastigote=13;Axenic_Amastigote=28;
LmxM.00	MF_V1	SLAS	101449	101450	.	+	.	ID=LmxM.30.0450a_SLAS_1;Promastigote=0;Intracellular_Amastigote=19;Axenic_Amastigote=8;
LmxM.00	MF_V1	SLAS	103007	103008	.	+	.	ID=LmxM.30.0450a_SLAS_2;Promastigote=0;Intracellular_Amastigote=2;Axenic_Amastigote=9;
LmxM.00	MF_V1	SLAS	105851	105852	.	+	.	ID=LmxM.30.0450a_SLAS_3;Promastigote=17;Intracellular_Amastigote=19;Axenic_Amastigote=39;
LmxM.00	MF_V1	SLAS	107689	107690	.	+	.	ID=LmxM.30.0440a_SLAS_1;Promastigote=0;Intracellular_Amastigote=21;Axenic_Amastigote=4;
LmxM.00	MF_V1	SLAS	109247	109248	.	+	.	ID=LmxM.30.0440a_SLAS_2;Promastigote=0;Intracellular_Amastigote=4;Axenic_Amastigote=14;
LmxM.00	MF_V1	SLAS	112519	112520	.	+	.	ID=LmxM.30.0440a_SLAS_3;Promastigote=47;Intracellular_Amastigote=18;Axenic_Amastigote=59;
LmxM.00	MF_V1	SLAS	112522	112523	.	+	.	ID=LmxM.30.0440a_SLAS_4;Promastigote=19;Intracellular_Amastigote=11;Axenic_Amastigote=35;
LmxM.00	MF_V1	SLAS	120223	120224	.	-	.	ID=LmxM.30.1440c_SLAS_2;Promastigote=29;Intracellular_Amastigote=16;Axenic_Amastigote=70;
LmxM.00	MF_V1	SLAS	120226	120227	.	-	.	ID=LmxM.30.1440c_SLAS_1;Promastigote=18;Intracellular_Amastigote=8;Axenic_Amastigote=47;
LmxM.00	MF_V1	SLAS	121186	121187	.	+	.	ID=LmxM.30.0440_SLAS_1;Promastigote=6;Intracellular_Amastigote=4;Axenic_Amastigote=2;
LmxM.00	MF_V1	SLAS	124473	124474	.	+	.	ID=LmxM.30.0440_SLAS_2;Promastigote=216;Intracellular_Amastigote=86;Axenic_Amastigote=263;
LmxM.00	MF_V1	SLAS	124504	124505	.	+	.	ID=LmxM.30.0440_SLAS_3;Promastigote=342;Intracellular_Amastigote=139;Axenic_Amastigote=399;
LmxM.00	MF_V1	SLAS	124507	124508	.	+	.	ID=LmxM.30.0440_SLAS_4;Promastigote=121;Intracellular_Amastigote=53;Axenic_Amastigote=163;
LmxM.00	MF_V1	SLAS	127174	127175	.	+	.	ID=LmxM.30.0430_SLAS_1;Promastigote=13;Intracellular_Amastigote=5;Axenic_Amastigote=10;
LmxM.00	MF_V1	SLAS	128978	128979	.	+	.	ID=LmxM.30.0430_SLAS_2;Promastigote=60;Intracellular_Amastigote=61;Axenic_Amastigote=66;
LmxM.00	MF_V1	SLAS	128986	128987	.	+	.	ID=LmxM.30.0430_SLAS_3;Promastigote=564;Intracellular_Amastigote=545;Axenic_Amastigote=1313;
LmxM.00	MF_V1	SLAS	128990	128991	.	+	.	ID=LmxM.30.0430_SLAS_4;Promastigote=24;Intracellular_Amastigote=17;Axenic_Amastigote=43;
LmxM.00	MF_V1	SLAS	128994	128995	.	+	.	ID=LmxM.30.0430_SLAS_5;Promastigote=38;Intracellular_Amastigote=27;Axenic_Amastigote=82;
LmxM.00	MF_V1	SLAS	133490	133491	.	+	.	ID=LmxM.30.0460a_SLAS_1;Promastigote=3;Intracellular_Amastigote=7;Axenic_Amastigote=24;
LmxM.00	MF_V1	SLAS	133496	133497	.	+	.	ID=LmxM.30.0460a_SLAS_2;Promastigote=3;Intracellular_Amastigote=4;Axenic_Amastigote=4;
LmxM.00	MF_V1	SLAS	137427	137428	.	+	.	ID=LmxM.34.0520b_SLAS_1;Promastigote=10;Intracellular_Amastigote=14;Axenic_Amastigote=10;
LmxM.00	MF_V1	SLAS	137449	137450	.	+	.	ID=LmxM.34.0520b_SLAS_2;Promastigote=2;Intracellular_Amastigote=4;Axenic_Amastigote=8;
LmxM.00	MF_V1	SLAS	137496	137497	.	+	.	ID=LmxM.34.0520b_SLAS_3;Promastigote=5;Intracellular_Amastigote=12;Axenic_Amastigote=14;
LmxM.00	MF_V1	SLAS	137517	137518	.	+	.	ID=LmxM.34.0520b_SLAS_4;Promastigote=1;Intracellular_Amastigote=0;Axenic_Amastigote=8;
LmxM.00	MF_V1	SLAS	137554	137555	.	+	.	ID=LmxM.34.0520b_SLAS_5;Promastigote=38;Intracellular_Amastigote=86;Axenic_Amastigote=134;
LmxM.00	MF_V1	SLAS	164943	164944	.	-	.	ID=LmxM.33.1830b_SLAS_2;Promastigote=455;Intracellular_Amastigote=131;Axenic_Amastigote=1109;
LmxM.00	MF_V1	SLAS	165995	165996	.	-	.	ID=LmxM.33.1830b_SLAS_1;Promastigote=20;Intracellular_Amastigote=17;Axenic_Amastigote=30;
LmxM.00	MF_V1	SLAS	171581	171582	.	-	.	ID=LmxM.26.1690_SLAS_3;Promastigote=8;Intracellular_Amastigote=4;Axenic_Amastigote=17;
LmxM.00	MF_V1	SLAS	171592	171593	.	-	.	ID=LmxM.26.1690_SLAS_2;Promastigote=66;Intracellular_Amastigote=15;Axenic_Amastigote=95;
LmxM.00	MF_V1	SLAS	171604	171605	.	-	.	ID=LmxM.26.1690_SLAS_1;Promastigote=377;Intracellular_Amastigote=58;Axenic_Amastigote=236;
LmxM.00	MF_V1	SLAS	187603	187604	.	-	.	ID=LmxM.34.0500a_SLAS_1;Promastigote=4;Intracellular_Amastigote=4;Axenic_Amastigote=13;
LmxM.00	MF_V1	SLAS	190981	190982	.	-	.	ID=LmxM.30.0450b_SLAS_4;Promastigote=58;Intracellular_Amastigote=165;Axenic_Amastigote=234;
LmxM.00	MF_V1	SLAS	191045	191046	.	-	.	ID=LmxM.30.0450b_SLAS_3;Promastigote=53;Intracellular_Amastigote=124;Axenic_Amastigote=235;
LmxM.00	MF_V1	SLAS	191085	191086	.	-	.	ID=LmxM.30.0450b_SLAS_2;Promastigote=3;Intracellular_Amastigote=12;Axenic_Amastigote=14;
LmxM.00	MF_V1	SLAS	191086	191087	.	-	.	ID=LmxM.30.0450b_SLAS_1;Promastigote=4;Intracellular_Amastigote=7;Axenic_Amastigote=4;
LmxM.00	MF_V1	SLAS	198148	198149	.	+	.	ID=LmxM.33.1800_SLAS_1;Promastigote=3;Intracellular_Amastigote=12;Axenic_Amastigote=20;
LmxM.00	MF_V1	SLAS	198184	198185	.	+	.	ID=LmxM.33.1800_SLAS_2;Promastigote=2;Intracellular_Amastigote=7;Axenic_Amastigote=14;
LmxM.00	MF_V1	SLAS	198188	198189	.	+	.	ID=LmxM.33.1800_SLAS_3;Promastigote=2;Intracellular_Amastigote=59;Axenic_Amastigote=52;
LmxM.00	MF_V1	SLAS	198191	198192	.	+	.	ID=LmxM.33.1800_SLAS_4;Promastigote=6;Intracellular_Amastigote=68;Axenic_Amastigote=68;
LmxM.00	MF_V1	SLAS	198979	198980	.	+	.	ID=LmxM.34.0400a_SLAS_1;Promastigote=1973;Intracellular_Amastigote=2725;Axenic_Amastigote=2667;
LmxM.00	MF_V1	SLAS	198982	198983	.	+	.	ID=LmxM.34.0400a_SLAS_2;Promastigote=37;Intracellular_Amastigote=78;Axenic_Amastigote=99;
LmxM.00	MF_V1	SLAS	198987	198988	.	+	.	ID=LmxM.34.0400a_SLAS_3;Promastigote=2;Intracellular_Amastigote=5;Axenic_Amastigote=10;
LmxM.00	MF_V1	SLAS	200833	200834	.	+	.	ID=LmxM.34.0400b_SLAS_1;Promastigote=2001;Intracellular_Amastigote=2730;Axenic_Amastigote=2695;
LmxM.00	MF_V1	SLAS	200836	200837	.	+	.	ID=LmxM.34.0400b_SLAS_2;Promastigote=51;Intracellular_Amastigote=73;Axenic_Amastigote=93;
LmxM.00	MF_V1	SLAS	200841	200842	.	+	.	ID=LmxM.34.0400b_SLAS_3;Promastigote=7;Intracellular_Amastigote=6;Axenic_Amastigote=13;
LmxM.00	MF_V1	SLAS	205157	205158	.	+	.	ID=LmxM.30.0450i_SLAS_1;Promastigote=9;Intracellular_Amastigote=8;Axenic_Amastigote=17;
LmxM.00	MF_V1	SLAS	205185	205186	.	+	.	ID=LmxM.30.0450i_SLAS_2;Promastigote=0;Intracellular_Amastigote=3;Axenic_Amastigote=8;
LmxM.00	MF_V1	SLAS	205215	205216	.	+	.	ID=LmxM.30.0450i_SLAS_3;Promastigote=46;Intracellular_Amastigote=147;Axenic_Amastigote=223;
LmxM.00	MF_V1	SLAS	211102	211103	.	+	.	ID=LmxM.33.1900_SLAS_1;Promastigote=1;Intracellular_Amastigote=11;Axenic_Amastigote=5;
LmxM.00	MF_V1	SLAS	211142	211143	.	+	.	ID=LmxM.33.1900_SLAS_2;Promastigote=1;Intracellular_Amastigote=5;Axenic_Amastigote=7;
LmxM.00	MF_V1	SLAS	211145	211146	.	+	.	ID=LmxM.33.1900_SLAS_3;Promastigote=0;Intracellular_Amastigote=7;Axenic_Amastigote=5;
LmxM.00	MF_V1	SLAS	214062	214063	.	+	.	ID=LmxM.33.1890_SLAS_1;Promastigote=1;Intracellular_Amastigote=3;Axenic_Amastigote=13;
LmxM.00	MF_V1	SLAS	216228	216229	.	-	.	ID=LmxM.33.1920a_SLAS_8;Promastigote=2;Intracellular_Amastigote=17;Axenic_Amastigote=13;
LmxM.00	MF_V1	SLAS	216364	216365	.	-	.	ID=LmxM.33.1920a_SLAS_7;Promastigote=7;Intracellular_Amastigote=69;Axenic_Amastigote=73;
LmxM.00	MF_V1	SLAS	216367	216368	.	-	.	ID=LmxM.33.1920a_SLAS_6;Promastigote=5;Intracellular_Amastigote=52;Axenic_Amastigote=47;
LmxM.00	MF_V1	SLAS	216371	216372	.	-	.	ID=LmxM.33.1920a_SLAS_5;Promastigote=293;Intracellular_Amastigote=2194;Axenic_Amastigote=1563;
LmxM.00	MF_V1	SLAS	216407	216408	.	-	.	ID=LmxM.33.1920a_SLAS_4;Promastigote=2;Intracellular_Amastigote=3;Axenic_Amastigote=12;
LmxM.00	MF_V1	SLAS	216548	216549	.	-	.	ID=LmxM.33.1920a_SLAS_3;Promastigote=2;Intracellular_Amastigote=4;Axenic_Amastigote=7;
LmxM.00	MF_V1	SLAS	216553	216554	.	-	.	ID=LmxM.33.1920a_SLAS_2;Promastigote=1;Intracellular_Amastigote=2;Axenic_Amastigote=11;
LmxM.00	MF_V1	SLAS	216559	216560	.	-	.	ID=LmxM.33.1920a_SLAS_1;Promastigote=5;Intracellular_Amastigote=5;Axenic_Amastigote=12;
LmxM.00	MF_V1	SLAS	218115	218116	.	-	.	ID=LmxM.16.0890a_SLAS_1;Promastigote=4;Intracellular_Amastigote=15;Axenic_Amastigote=16;
LmxM.00	MF_V1	SLAS	225024	225025	.	-	.	ID=LmxM.08.1050_SLAS_1;Promastigote=1;Intracellular_Amastigote=7;Axenic_Amastigote=3;
LmxM.00	MF_V1	SLAS	227881	227882	.	-	.	ID=LmxM.08.1040_SLAS_1;Promastigote=6;Intracellular_Amastigote=184;Axenic_Amastigote=131;
LmxM.00	MF_V1	SLAS	231317	231318	.	+	.	ID=LmxM.20.1370a_SLAS_1;Promastigote=7;Intracellular_Amastigote=16;Axenic_Amastigote=13;
LmxM.00	MF_V1	SLAS	234608	234609	.	-	.	ID=LmxM.24.1500a_SLAS_1;Promastigote=84;Intracellular_Amastigote=24;Axenic_Amastigote=73;
LmxM.00	MF_V1	SLAS	245905	245906	.	-	.	ID=LmxM.27.1390_SLAS_5;Promastigote=5;Intracellular_Amastigote=8;Axenic_Amastigote=14;
LmxM.00	MF_V1	SLAS	245909	245910	.	-	.	ID=LmxM.27.1390_SLAS_4;Promastigote=222;Intracellular_Amastigote=247;Axenic_Amastigote=322;
LmxM.00	MF_V1	SLAS	245993	245994	.	-	.	ID=LmxM.27.1390_SLAS_3;Promastigote=5;Intracellular_Amastigote=0;Axenic_Amastigote=5;
LmxM.00	MF_V1	SLAS	246031	246032	.	-	.	ID=LmxM.27.1390_SLAS_2;Promastigote=4;Intracellular_Amastigote=1;Axenic_Amastigote=4;
LmxM.00	MF_V1	SLAS	246041	246042	.	-	.	ID=LmxM.27.1390_SLAS_1;Promastigote=30;Intracellular_Amastigote=21;Axenic_Amastigote=26;
LmxM.00	MF_V1	SLAS	255456	255457	.	-	.	ID=LmxM.33.1920b_SLAS_8;Promastigote=0;Intracellular_Amastigote=17;Axenic_Amastigote=7;
LmxM.00	MF_V1	SLAS	255592	255593	.	-	.	ID=LmxM.33.1920b_SLAS_7;Promastigote=12;Intracellular_Amastigote=75;Axenic_Amastigote=63;
LmxM.00	MF_V1	SLAS	255595	255596	.	-	.	ID=LmxM.33.1920b_SLAS_6;Promastigote=7;Intracellular_Amastigote=59;Axenic_Amastigote=60;
LmxM.00	MF_V1	SLAS	255599	255600	.	-	.	ID=LmxM.33.1920b_SLAS_5;Promastigote=258;Intracellular_Amastigote=2096;Axenic_Amastigote=1609;
LmxM.00	MF_V1	SLAS	255635	255636	.	-	.	ID=LmxM.33.1920b_SLAS_4;Promastigote=4;Intracellular_Amastigote=5;Axenic_Amastigote=15;
LmxM.00	MF_V1	SLAS	255776	255777	.	-	.	ID=LmxM.33.1920b_SLAS_3;Promastigote=0;Intracellular_Amastigote=2;Axenic_Amastigote=8;
LmxM.00	MF_V1	SLAS	255781	255782	.	-	.	ID=LmxM.33.1920b_SLAS_2;Promastigote=2;Intracellular_Amastigote=2;Axenic_Amastigote=5;
LmxM.00	MF_V1	SLAS	255787	255788	.	-	.	ID=LmxM.33.1920b_SLAS_1;Promastigote=2;Intracellular_Amastigote=5;Axenic_Amastigote=9;
LmxM.00	MF_V1	SLAS	270664	270665	.	-	.	ID=LmxM.30.0450d_SLAS_2;Promastigote=15;Intracellular_Amastigote=15;Axenic_Amastigote=77;
LmxM.00	MF_V1	SLAS	270723	270724	.	-	.	ID=LmxM.30.0450d_SLAS_1;Promastigote=0;Intracellular_Amastigote=3;Axenic_Amastigote=7;
LmxM.00	MF_V1	SLAS	275412	275413	.	-	.	ID=LmxM.33.1900a_SLAS_3;Promastigote=0;Intracellular_Amastigote=19;Axenic_Amastigote=14;
LmxM.00	MF_V1	SLAS	275419	275420	.	-	.	ID=LmxM.33.1900a_SLAS_2;Promastigote=45;Intracellular_Amastigote=717;Axenic_Amastigote=409;
LmxM.00	MF_V1	SLAS	275455	275456	.	-	.	ID=LmxM.33.1900a_SLAS_1;Promastigote=10;Intracellular_Amastigote=15;Axenic_Amastigote=29;
LmxM.00	MF_V1	SLAS	281227	281228	.	-	.	ID=LmxM.08.1040a_SLAS_1;Promastigote=24;Intracellular_Amastigote=194;Axenic_Amastigote=120;
LmxM.00	MF_V1	SLAS	283910	283911	.	-	.	ID=LmxM.08.1030a_SLAS_1;Promastigote=17;Intracellular_Amastigote=218;Axenic_Amastigote=132;
LmxM.00	MF_V1	SLAS	294867	294868	.	+	.	ID=LmxM.33.1580_SLAS_1;Promastigote=2;Intracellular_Amastigote=20;Axenic_Amastigote=20;
LmxM.00	MF_V1	SLAS	294903	294904	.	+	.	ID=LmxM.33.1580_SLAS_2;Promastigote=51;Intracellular_Amastigote=330;Axenic_Amastigote=832;
LmxM.00	MF_V1	SLAS	294910	294911	.	+	.	ID=LmxM.33.1580_SLAS_3;Promastigote=0;Intracellular_Amastigote=3;Axenic_Amastigote=6;
LmxM.00	MF_V1	SLAS	295046	295047	.	+	.	ID=LmxM.33.1580_SLAS_4;Promastigote=0;Intracellular_Amastigote=8;Axenic_Amastigote=12;
LmxM.00	MF_V1	SLAS	297784	297785	.	+	.	ID=LmxM.33.1570_SLAS_1;Promastigote=3;Intracellular_Amastigote=3;Axenic_Amastigote=4;
LmxM.00	MF_V1	SLAS	297796	297797	.	+	.	ID=LmxM.33.1570_SLAS_2;Promastigote=3;Intracellular_Amastigote=5;Axenic_Amastigote=20;
LmxM.00	MF_V1	SLAS	301697	301698	.	+	.	ID=LmxM.33.1560a_SLAS_1;Promastigote=35;Intracellular_Amastigote=492;Axenic_Amastigote=492;
LmxM.00	MF_V1	SLAS	301741	301742	.	+	.	ID=LmxM.33.1560a_SLAS_2;Promastigote=12;Intracellular_Amastigote=112;Axenic_Amastigote=127;
LmxM.00	MF_V1	SLAS	305443	305444	.	-	.	ID=LmxM.30.0450e_SLAS_2;Promastigote=60;Intracellular_Amastigote=162;Axenic_Amastigote=264;
LmxM.00	MF_V1	SLAS	305480	305481	.	-	.	ID=LmxM.30.0450e_SLAS_1;Promastigote=25;Intracellular_Amastigote=18;Axenic_Amastigote=81;
LmxM.00	MF_V1	SLAS	309455	309456	.	-	.	ID=LmxM.30.0460e_SLAS_3;Promastigote=2;Intracellular_Amastigote=3;Axenic_Amastigote=5;
LmxM.00	MF_V1	SLAS	309461	309462	.	-	.	ID=LmxM.30.0460e_SLAS_2;Promastigote=4;Intracellular_Amastigote=7;Axenic_Amastigote=15;
LmxM.00	MF_V1	SLAS	316371	316372	.	-	.	ID=LmxM.30.0460e_SLAS_1;Promastigote=1;Intracellular_Amastigote=4;Axenic_Amastigote=12;
LmxM.00	MF_V1	SLAS	319782	319783	.	-	.	ID=LmxM.30.0452c_SLAS_4;Promastigote=47;Intracellular_Amastigote=168;Axenic_Amastigote=257;
LmxM.00	MF_V1	SLAS	319819	319820	.	-	.	ID=LmxM.30.0452c_SLAS_3;Promastigote=3;Intracellular_Amastigote=3;Axenic_Amastigote=13;
LmxM.00	MF_V1	SLAS	319840	319841	.	-	.	ID=LmxM.30.0452c_SLAS_2;Promastigote=3;Intracellular_Amastigote=5;Axenic_Amastigote=8;
LmxM.00	MF_V1	SLAS	319846	319847	.	-	.	ID=LmxM.30.0452c_SLAS_1;Promastigote=81;Intracellular_Amastigote=91;Axenic_Amastigote=220;
LmxM.00	MF_V1	SLAS	323823	323824	.	-	.	ID=LmxM.30.0460c_SLAS_2;Promastigote=1;Intracellular_Amastigote=7;Axenic_Amastigote=10;
LmxM.00	MF_V1	SLAS	323829	323830	.	-	.	ID=LmxM.30.0460c_SLAS_1;Promastigote=3;Intracellular_Amastigote=9;Axenic_Amastigote=19;
LmxM.00	MF_V1	SLAS	332563	332564	.	-	.	ID=LmxM.33.1720b_SLAS_4;Promastigote=0;Intracellular_Amastigote=14;Axenic_Amastigote=7;
LmxM.00	MF_V1	SLAS	332566	332567	.	-	.	ID=LmxM.33.1720b_SLAS_3;Promastigote=1;Intracellular_Amastigote=11;Axenic_Amastigote=3;
LmxM.00	MF_V1	SLAS	332570	332571	.	-	.	ID=LmxM.33.1720b_SLAS_2;Promastigote=22;Intracellular_Amastigote=157;Axenic_Amastigote=75;
LmxM.00	MF_V1	SLAS	332758	332759	.	-	.	ID=LmxM.33.1720b_SLAS_1;Promastigote=1;Intracellular_Amastigote=4;Axenic_Amastigote=4;
LmxM.00	MF_V1	SLAS	334938	334939	.	-	.	ID=LmxM.33.1725_SLAS_5;Promastigote=0;Intracellular_Amastigote=8;Axenic_Amastigote=5;
LmxM.00	MF_V1	SLAS	334941	334942	.	-	.	ID=LmxM.33.1725_SLAS_4;Promastigote=0;Intracellular_Amastigote=8;Axenic_Amastigote=6;
LmxM.00	MF_V1	SLAS	334945	334946	.	-	.	ID=LmxM.33.1725_SLAS_3;Promastigote=18;Intracellular_Amastigote=165;Axenic_Amastigote=78;
LmxM.00	MF_V1	SLAS	335122	335123	.	-	.	ID=LmxM.33.1725_SLAS_2;Promastigote=0;Intracellular_Amastigote=2;Axenic_Amastigote=8;
LmxM.00	MF_V1	SLAS	335133	335134	.	-	.	ID=LmxM.33.1725_SLAS_1;Promastigote=3;Intracellular_Amastigote=5;Axenic_Amastigote=11;
LmxM.00	MF_V1	SLAS	339722	339723	.	-	.	ID=LmxM.30.0460d_SLAS_7;Promastigote=0;Intracellular_Amastigote=5;Axenic_Amastigote=4;
LmxM.00	MF_V1	SLAS	339746	339747	.	-	.	ID=LmxM.30.0460d_SLAS_6;Promastigote=1;Intracellular_Amastigote=9;Axenic_Amastigote=15;
LmxM.00	MF_V1	SLAS	339753	339754	.	-	.	ID=LmxM.30.0460d_SLAS_5;Promastigote=52;Intracellular_Amastigote=118;Axenic_Amastigote=227;
LmxM.00	MF_V1	SLAS	339774	339775	.	-	.	ID=LmxM.30.0460d_SLAS_4;Promastigote=33;Intracellular_Amastigote=55;Axenic_Amastigote=114;
LmxM.00	MF_V1	SLAS	341362	341363	.	-	.	ID=LmxM.30.0460d_SLAS_3;Promastigote=7;Intracellular_Amastigote=3;Axenic_Amastigote=10;
LmxM.00	MF_V1	SLAS	341371	341372	.	-	.	ID=LmxM.30.0460d_SLAS_2;Promastigote=6;Intracellular_Amastigote=3;Axenic_Amastigote=6;
LmxM.00	MF_V1	SLAS	341376	341377	.	-	.	ID=LmxM.30.0460d_SLAS_1;Promastigote=197;Intracellular_Amastigote=230;Axenic_Amastigote=354;
LmxM.00	MF_V1	SLAS	343021	343022	.	-	.	ID=LmxM.30.0480b_SLAS_5;Promastigote=12;Intracellular_Amastigote=9;Axenic_Amastigote=16;
LmxM.00	MF_V1	SLAS	343046	343047	.	-	.	ID=LmxM.30.0480b_SLAS_4;Promastigote=12;Intracellular_Amastigote=27;Axenic_Amastigote=13;
LmxM.00	MF_V1	SLAS	343082	343083	.	-	.	ID=LmxM.30.0480b_SLAS_3;Promastigote=38;Intracellular_Amastigote=20;Axenic_Amastigote=40;
LmxM.00	MF_V1	SLAS	343163	343164	.	-	.	ID=LmxM.30.0480b_SLAS_2;Promastigote=9;Intracellular_Amastigote=2;Axenic_Amastigote=4;
LmxM.00	MF_V1	SLAS	343605	343606	.	-	.	ID=LmxM.30.0480b_SLAS_1;Promastigote=3;Intracellular_Amastigote=5;Axenic_Amastigote=6;
LmxM.00	MF_V1	SLAS	346518	346519	.	-	.	ID=LmxM.30.0490b_SLAS_4;Promastigote=163;Intracellular_Amastigote=97;Axenic_Amastigote=190;
LmxM.00	MF_V1	SLAS	346928	346929	.	-	.	ID=LmxM.30.0490b_SLAS_3;Promastigote=0;Intracellular_Amastigote=6;Axenic_Amastigote=13;
LmxM.00	MF_V1	SLAS	349436	349437	.	-	.	ID=LmxM.30.0490b_SLAS_2;Promastigote=1;Intracellular_Amastigote=3;Axenic_Amastigote=6;
LmxM.00	MF_V1	SLAS	349499	349500	.	-	.	ID=LmxM.30.0490b_SLAS_1;Promastigote=3;Intracellular_Amastigote=5;Axenic_Amastigote=11;
LmxM.00	MF_V1	SLAS	354775	354776	.	+	.	ID=LmxM.28.2740a_SLAS_1;Promastigote=9159;Intracellular_Amastigote=2929;Axenic_Amastigote=10135;
LmxM.00	MF_V1	SLAS	354780	354781	.	+	.	ID=LmxM.28.2740a_SLAS_2;Promastigote=324;Intracellular_Amastigote=75;Axenic_Amastigote=306;
LmxM.00	MF_V1	SLAS	354831	354832	.	+	.	ID=LmxM.28.2740a_SLAS_3;Promastigote=7;Intracellular_Amastigote=4;Axenic_Amastigote=21;
LmxM.00	MF_V1	SLAS	356728	356729	.	+	.	ID=LmxM.28.2750partial_SLAS_1;Promastigote=134;Intracellular_Amastigote=193;Axenic_Amastigote=446;
LmxM.00	MF_V1	SLAS	358752	358753	.	+	.	ID=LmxM.28.2750partial_SLAS_2;Promastigote=9;Intracellular_Amastigote=0;Axenic_Amastigote=6;
LmxM.00	MF_V1	SLAS	358755	358756	.	+	.	ID=LmxM.28.2750partial_SLAS_3;Promastigote=9359;Intracellular_Amastigote=2993;Axenic_Amastigote=10245;
LmxM.00	MF_V1	SLAS	358760	358761	.	+	.	ID=LmxM.28.2750partial_SLAS_4;Promastigote=306;Intracellular_Amastigote=70;Axenic_Amastigote=315;
LmxM.00	MF_V1	SLAS	358811	358812	.	+	.	ID=LmxM.28.2750partial_SLAS_5;Promastigote=17;Intracellular_Amastigote=5;Axenic_Amastigote=27;
LmxM.00	MF_V1	SLAS	362869	362870	.	+	.	ID=LmxM.05.1070a_SLAS_1;Promastigote=6;Intracellular_Amastigote=9;Axenic_Amastigote=2;
LmxM.00	MF_V1	SLAS	365758	365759	.	+	.	ID=LmxM.05.1080a_SLAS_1;Promastigote=72;Intracellular_Amastigote=11;Axenic_Amastigote=30;
LmxM.00	MF_V1	SLAS	365825	365826	.	+	.	ID=LmxM.05.1080a_SLAS_2;Promastigote=16;Intracellular_Amastigote=2;Axenic_Amastigote=7;
LmxM.00	MF_V1	SLAS	380425	380426	.	-	.	ID=LmxM.33.1920e_SLAS_7;Promastigote=1;Intracellular_Amastigote=9;Axenic_Amastigote=9;
LmxM.00	MF_V1	SLAS	380561	380562	.	-	.	ID=LmxM.33.1920e_SLAS_6;Promastigote=8;Intracellular_Amastigote=82;Axenic_Amastigote=74;
LmxM.00	MF_V1	SLAS	380564	380565	.	-	.	ID=LmxM.33.1920e_SLAS_5;Promastigote=6;Intracellular_Amastigote=55;Axenic_Amastigote=62;
LmxM.00	MF_V1	SLAS	380568	380569	.	-	.	ID=LmxM.33.1920e_SLAS_4;Promastigote=301;Intracellular_Amastigote=2050;Axenic_Amastigote=1624;
LmxM.00	MF_V1	SLAS	380604	380605	.	-	.	ID=LmxM.33.1920e_SLAS_3;Promastigote=4;Intracellular_Amastigote=6;Axenic_Amastigote=21;
LmxM.00	MF_V1	SLAS	380745	380746	.	-	.	ID=LmxM.33.1920e_SLAS_2;Promastigote=1;Intracellular_Amastigote=1;Axenic_Amastigote=13;
LmxM.00	MF_V1	SLAS	380756	380757	.	-	.	ID=LmxM.33.1920e_SLAS_1;Promastigote=2;Intracellular_Amastigote=6;Axenic_Amastigote=8;
LmxM.00	MF_V1	SLAS	381873	381874	.	+	.	ID=LmxM.22.0691a_SLAS_1;Promastigote=172;Intracellular_Amastigote=989;Axenic_Amastigote=794;
LmxM.00	MF_V1	SLAS	381880	381881	.	+	.	ID=LmxM.22.0691a_SLAS_2;Promastigote=3;Intracellular_Amastigote=20;Axenic_Amastigote=17;
LmxM.00	MF_V1	SLAS	381938	381939	.	+	.	ID=LmxM.22.0691a_SLAS_3;Promastigote=6;Intracellular_Amastigote=18;Axenic_Amastigote=61;
LmxM.00	MF_V1	SLAS	389542	389543	.	+	.	ID=LmxM.30.1460_SLAS_1;Promastigote=163;Intracellular_Amastigote=142;Axenic_Amastigote=278;
LmxM.00	MF_V1	SLAS	389551	389552	.	+	.	ID=LmxM.30.1460_SLAS_2;Promastigote=8;Intracellular_Amastigote=6;Axenic_Amastigote=10;
LmxM.00	MF_V1	SLAS	390331	390332	.	+	.	ID=LmxM.30.1460_SLAS_3;Promastigote=2;Intracellular_Amastigote=0;Axenic_Amastigote=11;
LmxM.00	MF_V1	SLAS	395620	395621	.	+	.	ID=LmxM.30.3040a_SLAS_1;Promastigote=104;Intracellular_Amastigote=89;Axenic_Amastigote=179;
LmxM.00	MF_V1	SLAS	395625	395626	.	+	.	ID=LmxM.30.3040a_SLAS_2;Promastigote=5;Intracellular_Amastigote=12;Axenic_Amastigote=30;
LmxM.00	MF_V1	SLAS	396661	396662	.	+	.	ID=LmxM.30.3040a_SLAS_3;Promastigote=15;Intracellular_Amastigote=11;Axenic_Amastigote=31;
LmxM.00	MF_V1	SLAS	402832	402833	.	-	.	ID=LmxM.30.0453_SLAS_2;Promastigote=29;Intracellular_Amastigote=65;Axenic_Amastigote=139;
LmxM.00	MF_V1	SLAS	407263	407264	.	-	.	ID=LmxM.30.0453_SLAS_1;Promastigote=0;Intracellular_Amastigote=3;Axenic_Amastigote=8;
LmxM.00	MF_V1	SLAS	410675	410676	.	-	.	ID=LmxM.30.0454_SLAS_1;Promastigote=15;Intracellular_Amastigote=17;Axenic_Amastigote=66;
LmxM.00	MF_V1	SLAS	420049	420050	.	-	.	ID=LmxM.10.0380_SLAS_3;Promastigote=4;Intracellular_Amastigote=15;Axenic_Amastigote=16;
LmxM.00	MF_V1	SLAS	420339	420340	.	-	.	ID=LmxM.10.0380_SLAS_2;Promastigote=530;Intracellular_Amastigote=199;Axenic_Amastigote=653;
LmxM.00	MF_V1	SLAS	420403	420404	.	-	.	ID=LmxM.10.0380_SLAS_1;Promastigote=18;Intracellular_Amastigote=7;Axenic_Amastigote=20;
LmxM.00	MF_V1	SLAS	426462	426463	.	-	.	ID=LmxM.30.1440b_SLAS_1;Promastigote=56;Intracellular_Amastigote=12;Axenic_Amastigote=33;
LmxM.00	MF_V1	SLAS	434025	434026	.	-	.	ID=LmxM.31.3650_SLAS_3;Promastigote=8;Intracellular_Amastigote=2;Axenic_Amastigote=4;
LmxM.00	MF_V1	SLAS	434085	434086	.	-	.	ID=LmxM.31.3650_SLAS_2;Promastigote=9;Intracellular_Amastigote=12;Axenic_Amastigote=11;
LmxM.00	MF_V1	SLAS	434135	434136	.	-	.	ID=LmxM.31.3650_SLAS_1;Promastigote=41;Intracellular_Amastigote=8;Axenic_Amastigote=28;
LmxM.00	MF_V1	SLAS	436894	436895	.	+	.	ID=LmxM.13.0300_SLAS_1;Promastigote=3;Intracellular_Amastigote=0;Axenic_Amastigote=7;
LmxM.00	MF_V1	SLAS	437249	437250	.	+	.	ID=LmxM.13.0300_SLAS_2;Promastigote=8;Intracellular_Amastigote=1;Axenic_Amastigote=3;
LmxM.00	MF_V1	SLAS	437289	437290	.	+	.	ID=LmxM.13.0300_SLAS_3;Promastigote=14;Intracellular_Amastigote=19;Axenic_Amastigote=16;
LmxM.00	MF_V1	SLAS	437301	437302	.	+	.	ID=LmxM.13.0300_SLAS_4;Promastigote=13792;Intracellular_Amastigote=11872;Axenic_Amastigote=29421;
LmxM.00	MF_V1	SLAS	437369	437370	.	+	.	ID=LmxM.13.0300_SLAS_5;Promastigote=11;Intracellular_Amastigote=26;Axenic_Amastigote=49;
LmxM.00	MF_V1	SLAS	441205	441206	.	+	.	ID=LmxM.14.0720_SLAS_1;Promastigote=5;Intracellular_Amastigote=6;Axenic_Amastigote=7;
LmxM.00	MF_V1	SLAS	441517	441518	.	+	.	ID=LmxM.14.0720_SLAS_2;Promastigote=168;Intracellular_Amastigote=50;Axenic_Amastigote=108;
LmxM.00	MF_V1	SLAS	444615	444616	.	+	.	ID=LmxM.14.0710_SLAS_1;Promastigote=57;Intracellular_Amastigote=13;Axenic_Amastigote=68;
LmxM.00	MF_V1	SLAS	456363	456364	.	-	.	ID=LmxM.33.1720c_SLAS_8;Promastigote=1;Intracellular_Amastigote=19;Axenic_Amastigote=20;
LmxM.00	MF_V1	SLAS	456499	456500	.	-	.	ID=LmxM.33.1720c_SLAS_7;Promastigote=9;Intracellular_Amastigote=189;Axenic_Amastigote=141;
LmxM.00	MF_V1	SLAS	456506	456507	.	-	.	ID=LmxM.33.1720c_SLAS_6;Promastigote=415;Intracellular_Amastigote=3102;Axenic_Amastigote=2371;
LmxM.00	MF_V1	SLAS	456542	456543	.	-	.	ID=LmxM.33.1720c_SLAS_5;Promastigote=5;Intracellular_Amastigote=8;Axenic_Amastigote=16;
LmxM.00	MF_V1	SLAS	456683	456684	.	-	.	ID=LmxM.33.1720c_SLAS_4;Promastigote=0;Intracellular_Amastigote=7;Axenic_Amastigote=18;
LmxM.00	MF_V1	SLAS	456688	456689	.	-	.	ID=LmxM.33.1720c_SLAS_3;Promastigote=5;Intracellular_Amastigote=16;Axenic_Amastigote=21;
LmxM.00	MF_V1	SLAS	456692	456693	.	-	.	ID=LmxM.33.1720c_SLAS_2;Promastigote=1;Intracellular_Amastigote=2;Axenic_Amastigote=6;
LmxM.00	MF_V1	SLAS	456694	456695	.	-	.	ID=LmxM.33.1720c_SLAS_1;Promastigote=3;Intracellular_Amastigote=15;Axenic_Amastigote=9;
LmxM.00	MF_V1	SLAS	464930	464931	.	+	.	ID=LmxM.20_36.6470_SLAS_1;Promastigote=105;Intracellular_Amastigote=105;Axenic_Amastigote=175;
LmxM.00	MF_V1	SLAS	464941	464942	.	+	.	ID=LmxM.20_36.6470_SLAS_2;Promastigote=9;Intracellular_Amastigote=3;Axenic_Amastigote=23;
LmxM.00	MF_V1	SLAS	467584	467585	.	+	.	ID=LmxM.20_36.6480a_SLAS_1;Promastigote=9;Intracellular_Amastigote=25;Axenic_Amastigote=11;
LmxM.00	MF_V1	SLAS	469822	469823	.	+	.	ID=LmxM.20_36.6480a_SLAS_2;Promastigote=231;Intracellular_Amastigote=10;Axenic_Amastigote=86;
LmxM.00	MF_V1	SLAS	469825	469826	.	+	.	ID=LmxM.20_36.6480a_SLAS_3;Promastigote=119;Intracellular_Amastigote=6;Axenic_Amastigote=57;
LmxM.00	MF_V1	SLAS	469853	469854	.	+	.	ID=LmxM.20_36.6480a_SLAS_4;Promastigote=35;Intracellular_Amastigote=2;Axenic_Amastigote=9;
LmxM.00	MF_V1	SLAS	469911	469912	.	+	.	ID=LmxM.20_36.6480a_SLAS_5;Promastigote=10;Intracellular_Amastigote=0;Axenic_Amastigote=0;
LmxM.00	MF_V1	SLAS	473786	473787	.	+	.	ID=LmxM.30.0450h_SLAS_1;Promastigote=2;Intracellular_Amastigote=5;Axenic_Amastigote=3;
LmxM.00	MF_V1	SLAS	473853	473854	.	+	.	ID=LmxM.30.0450h_SLAS_2;Promastigote=28;Intracellular_Amastigote=20;Axenic_Amastigote=71;
LmxM.00	MF_V1	SLAS	473890	473891	.	+	.	ID=LmxM.30.0450h_SLAS_3;Promastigote=37;Intracellular_Amastigote=41;Axenic_Amastigote=65;
LmxM.00	MF_V1	SLAS	484678	484679	.	+	.	ID=LmxM.33.1840_SLAS_1;Promastigote=1;Intracellular_Amastigote=24;Axenic_Amastigote=25;
LmxM.00	MF_V1	SLAS	484714	484715	.	+	.	ID=LmxM.33.1840_SLAS_2;Promastigote=35;Intracellular_Amastigote=233;Axenic_Amastigote=362;
LmxM.00	MF_V1	SLAS	484721	484722	.	+	.	ID=LmxM.33.1840_SLAS_3;Promastigote=1;Intracellular_Amastigote=3;Axenic_Amastigote=5;
LmxM.00	MF_V1	SLAS	487619	487620	.	+	.	ID=LmxM.34.1830a_SLAS_1;Promastigote=0;Intracellular_Amastigote=5;Axenic_Amastigote=16;
LmxM.00	MF_V1	SLAS	494457	494458	.	-	.	ID=LmxM.30.1800a_SLAS_4;Promastigote=5;Intracellular_Amastigote=23;Axenic_Amastigote=24;
LmxM.00	MF_V1	SLAS	494973	494974	.	-	.	ID=LmxM.30.1800a_SLAS_3;Promastigote=9;Intracellular_Amastigote=1;Axenic_Amastigote=1;
LmxM.00	MF_V1	SLAS	495494	495495	.	-	.	ID=LmxM.30.1800a_SLAS_2;Promastigote=204;Intracellular_Amastigote=41;Axenic_Amastigote=72;
LmxM.00	MF_V1	SLAS	495504	495505	.	-	.	ID=LmxM.30.1800a_SLAS_1;Promastigote=6;Intracellular_Amastigote=0;Axenic_Amastigote=7;
LmxM.00	MF_V1	SLAS	496466	496467	.	-	.	ID=LmxM.33.1920_SLAS_6;Promastigote=1;Intracellular_Amastigote=17;Axenic_Amastigote=14;
LmxM.00	MF_V1	SLAS	496602	496603	.	-	.	ID=LmxM.33.1920_SLAS_5;Promastigote=3;Intracellular_Amastigote=65;Axenic_Amastigote=76;
LmxM.00	MF_V1	SLAS	496605	496606	.	-	.	ID=LmxM.33.1920_SLAS_4;Promastigote=7;Intracellular_Amastigote=52;Axenic_Amastigote=42;
LmxM.00	MF_V1	SLAS	496609	496610	.	-	.	ID=LmxM.33.1920_SLAS_3;Promastigote=271;Intracellular_Amastigote=2023;Axenic_Amastigote=1689;
LmxM.00	MF_V1	SLAS	496645	496646	.	-	.	ID=LmxM.33.1920_SLAS_2;Promastigote=5;Intracellular_Amastigote=5;Axenic_Amastigote=20;
LmxM.00	MF_V1	SLAS	496797	496798	.	-	.	ID=LmxM.33.1920_SLAS_1;Promastigote=0;Intracellular_Amastigote=4;Axenic_Amastigote=13;
LmxM.00	MF_V1	SLAS	498153	498154	.	-	.	ID=LmxM.08.1050a_SLAS_2;Promastigote=2;Intracellular_Amastigote=4;Axenic_Amastigote=3;
LmxM.00	MF_V1	SLAS	498343	498344	.	-	.	ID=LmxM.08.1050a_SLAS_1;Promastigote=6;Intracellular_Amastigote=189;Axenic_Amastigote=126;
LmxM.00	MF_V1	SLAS	501084	501085	.	-	.	ID=LmxM.08.1040b_SLAS_1;Promastigote=15;Intracellular_Amastigote=211;Axenic_Amastigote=126;
LmxM.00	MF_V1	SLAS	501710	501711	.	-	.	ID=LmxM.33.1721_SLAS_9;Promastigote=1;Intracellular_Amastigote=29;Axenic_Amastigote=13;
LmxM.00	MF_V1	SLAS	501862	501863	.	-	.	ID=LmxM.33.1721_SLAS_8;Promastigote=3;Intracellular_Amastigote=43;Axenic_Amastigote=28;
LmxM.00	MF_V1	SLAS	501865	501866	.	-	.	ID=LmxM.33.1721_SLAS_7;Promastigote=3;Intracellular_Amastigote=18;Axenic_Amastigote=5;
LmxM.00	MF_V1	SLAS	501869	501870	.	-	.	ID=LmxM.33.1721_SLAS_6;Promastigote=67;Intracellular_Amastigote=512;Axenic_Amastigote=390;
LmxM.00	MF_V1	SLAS	501905	501906	.	-	.	ID=LmxM.33.1721_SLAS_5;Promastigote=5;Intracellular_Amastigote=2;Axenic_Amastigote=7;
LmxM.00	MF_V1	SLAS	502046	502047	.	-	.	ID=LmxM.33.1721_SLAS_4;Promastigote=0;Intracellular_Amastigote=12;Axenic_Amastigote=23;
LmxM.00	MF_V1	SLAS	502051	502052	.	-	.	ID=LmxM.33.1721_SLAS_3;Promastigote=4;Intracellular_Amastigote=17;Axenic_Amastigote=30;
LmxM.00	MF_V1	SLAS	502055	502056	.	-	.	ID=LmxM.33.1721_SLAS_2;Promastigote=1;Intracellular_Amastigote=1;Axenic_Amastigote=7;
LmxM.00	MF_V1	SLAS	502057	502058	.	-	.	ID=LmxM.33.1721_SLAS_1;Promastigote=4;Intracellular_Amastigote=8;Axenic_Amastigote=21;
LmxM.00	MF_V1	SLAS	504482	504483	.	-	.	ID=LmxM.33.1720a_SLAS_2;Promastigote=0;Intracellular_Amastigote=12;Axenic_Amastigote=6;
LmxM.00	MF_V1	SLAS	504489	504490	.	-	.	ID=LmxM.33.1720a_SLAS_1;Promastigote=24;Intracellular_Amastigote=164;Axenic_Amastigote=89;
LmxM.00	MF_V1	SLAS	516734	516735	.	-	.	ID=LmxM.33.1830_SLAS_146;Promastigote=4;Intracellular_Amastigote=4;Axenic_Amastigote=14;
LmxM.00	MF_V1	SLAS	516746	516747	.	-	.	ID=LmxM.33.1830_SLAS_145;Promastigote=2;Intracellular_Amastigote=2;Axenic_Amastigote=5;
LmxM.00	MF_V1	SLAS	538880	538881	.	-	.	ID=LmxM.33.1830_SLAS_144;Promastigote=219;Intracellular_Amastigote=40;Axenic_Amastigote=103;
LmxM.00	MF_V1	SLAS	539629	539630	.	-	.	ID=LmxM.33.1830_SLAS_143;Promastigote=33;Intracellular_Amastigote=21;Axenic_Amastigote=71;
LmxM.00	MF_V1	SLAS	557448	557449	.	-	.	ID=LmxM.33.1830_SLAS_142;Promastigote=2;Intracellular_Amastigote=7;Axenic_Amastigote=10;
LmxM.00	MF_V1	SLAS	557488	557489	.	-	.	ID=LmxM.33.1830_SLAS_141;Promastigote=6;Intracellular_Amastigote=3;Axenic_Amastigote=8;
LmxM.00	MF_V1	SLAS	557498	557499	.	-	.	ID=LmxM.33.1830_SLAS_140;Promastigote=7;Intracellular_Amastigote=4;Axenic_Amastigote=16;
LmxM.00	MF_V1	SLAS	558624	558625	.	-	.	ID=LmxM.33.1830_SLAS_139;Promastigote=1;Intracellular_Amastigote=5;Axenic_Amastigote=5;
LmxM.00	MF_V1	SLAS	558705	558706	.	-	.	ID=LmxM.33.1830_SLAS_138;Promastigote=0;Intracellular_Amastigote=2;Axenic_Amastigote=16;
LmxM.00	MF_V1	SLAS	562817	562818	.	-	.	ID=LmxM.33.1830_SLAS_137;Promastigote=11;Intracellular_Amastigote=71;Axenic_Amastigote=69;
LmxM.00	MF_V1	SLAS	562820	562821	.	-	.	ID=LmxM.33.1830_SLAS_136;Promastigote=8;Intracellular_Amastigote=53;Axenic_Amastigote=50;
LmxM.00	MF_V1	SLAS	562824	562825	.	-	.	ID=LmxM.33.1830_SLAS_135;Promastigote=289;Intracellular_Amastigote=2080;Axenic_Amastigote=1655;
LmxM.00	MF_V1	SLAS	562860	562861	.	-	.	ID=LmxM.33.1830_SLAS_134;Promastigote=5;Intracellular_Amastigote=3;Axenic_Amastigote=19;
LmxM.00	MF_V1	SLAS	563006	563007	.	-	.	ID=LmxM.33.1830_SLAS_133;Promastigote=3;Intracellular_Amastigote=3;Axenic_Amastigote=3;
LmxM.00	MF_V1	SLAS	563012	563013	.	-	.	ID=LmxM.33.1830_SLAS_132;Promastigote=1;Intracellular_Amastigote=4;Axenic_Amastigote=9;
LmxM.00	MF_V1	SLAS	574290	574291	.	-	.	ID=LmxM.33.1830_SLAS_131;Promastigote=9;Intracellular_Amastigote=0;Axenic_Amastigote=8;
LmxM.00	MF_V1	SLAS	574331	574332	.	-	.	ID=LmxM.33.1830_SLAS_130;Promastigote=88;Intracellular_Amastigote=52;Axenic_Amastigote=64;
LmxM.00	MF_V1	SLAS	595763	595764	.	-	.	ID=LmxM.33.1830_SLAS_129;Promastigote=0;Intracellular_Amastigote=7;Axenic_Amastigote=10;
LmxM.00	MF_V1	SLAS	595901	595902	.	-	.	ID=LmxM.33.1830_SLAS_128;Promastigote=5;Intracellular_Amastigote=67;Axenic_Amastigote=89;
LmxM.00	MF_V1	SLAS	595904	595905	.	-	.	ID=LmxM.33.1830_SLAS_127;Promastigote=7;Intracellular_Amastigote=54;Axenic_Amastigote=65;
LmxM.00	MF_V1	SLAS	595908	595909	.	-	.	ID=LmxM.33.1830_SLAS_126;Promastigote=289;Intracellular_Amastigote=2123;Axenic_Amastigote=1704;
LmxM.00	MF_V1	SLAS	595944	595945	.	-	.	ID=LmxM.33.1830_SLAS_125;Promastigote=5;Intracellular_Amastigote=5;Axenic_Amastigote=13;
LmxM.00	MF_V1	SLAS	596085	596086	.	-	.	ID=LmxM.33.1830_SLAS_124;Promastigote=2;Intracellular_Amastigote=5;Axenic_Amastigote=8;
LmxM.00	MF_V1	SLAS	596096	596097	.	-	.	ID=LmxM.33.1830_SLAS_123;Promastigote=3;Intracellular_Amastigote=2;Axenic_Amastigote=10;
LmxM.00	MF_V1	SLAS	597269	597270	.	-	.	ID=LmxM.33.1830_SLAS_122;Promastigote=6;Intracellular_Amastigote=1;Axenic_Amastigote=7;
LmxM.00	MF_V1	SLAS	603812	603813	.	-	.	ID=LmxM.33.1830_SLAS_121;Promastigote=63;Intracellular_Amastigote=9;Axenic_Amastigote=35;
LmxM.00	MF_V1	SLAS	606882	606883	.	-	.	ID=LmxM.33.1830_SLAS_120;Promastigote=1;Intracellular_Amastigote=14;Axenic_Amastigote=4;
LmxM.00	MF_V1	SLAS	607908	607909	.	-	.	ID=LmxM.33.1830_SLAS_119;Promastigote=1;Intracellular_Amastigote=11;Axenic_Amastigote=4;
LmxM.00	MF_V1	SLAS	607922	607923	.	-	.	ID=LmxM.33.1830_SLAS_118;Promastigote=20;Intracellular_Amastigote=24;Axenic_Amastigote=24;
LmxM.00	MF_V1	SLAS	609951	609952	.	-	.	ID=LmxM.33.1830_SLAS_117;Promastigote=7;Intracellular_Amastigote=1;Axenic_Amastigote=12;
LmxM.00	MF_V1	SLAS	611846	611847	.	-	.	ID=LmxM.33.1830_SLAS_116;Promastigote=7;Intracellular_Amastigote=4;Axenic_Amastigote=4;
LmxM.00	MF_V1	SLAS	611898	611899	.	-	.	ID=LmxM.33.1830_SLAS_115;Promastigote=441;Intracellular_Amastigote=126;Axenic_Amastigote=235;
LmxM.00	MF_V1	SLAS	617293	617294	.	-	.	ID=LmxM.33.1830_SLAS_114;Promastigote=5;Intracellular_Amastigote=173;Axenic_Amastigote=125;
LmxM.00	MF_V1	SLAS	619583	619584	.	-	.	ID=LmxM.33.1830_SLAS_113;Promastigote=12;Intracellular_Amastigote=6;Axenic_Amastigote=6;
LmxM.00	MF_V1	SLAS	619586	619587	.	-	.	ID=LmxM.33.1830_SLAS_112;Promastigote=184;Intracellular_Amastigote=57;Axenic_Amastigote=134;
LmxM.00	MF_V1	SLAS	621279	621280	.	-	.	ID=LmxM.33.1830_SLAS_111;Promastigote=0;Intracellular_Amastigote=1;Axenic_Amastigote=10;
LmxM.00	MF_V1	SLAS	627777	627778	.	-	.	ID=LmxM.33.1830_SLAS_110;Promastigote=49;Intracellular_Amastigote=8;Axenic_Amastigote=40;
LmxM.00	MF_V1	SLAS	636724	636725	.	-	.	ID=LmxM.33.1830_SLAS_109;Promastigote=0;Intracellular_Amastigote=6;Axenic_Amastigote=7;
LmxM.00	MF_V1	SLAS	636787	636788	.	-	.	ID=LmxM.33.1830_SLAS_108;Promastigote=2;Intracellular_Amastigote=3;Axenic_Amastigote=6;
LmxM.00	MF_V1	SLAS	651750	651751	.	-	.	ID=LmxM.33.1830_SLAS_107;Promastigote=9;Intracellular_Amastigote=22;Axenic_Amastigote=24;
LmxM.00	MF_V1	SLAS	651768	651769	.	-	.	ID=LmxM.33.1830_SLAS_106;Promastigote=74;Intracellular_Amastigote=186;Axenic_Amastigote=199;
LmxM.00	MF_V1	SLAS	651782	651783	.	-	.	ID=LmxM.33.1830_SLAS_105;Promastigote=3;Intracellular_Amastigote=14;Axenic_Amastigote=3;
LmxM.00	MF_V1	SLAS	651791	651792	.	-	.	ID=LmxM.33.1830_SLAS_104;Promastigote=5;Intracellular_Amastigote=31;Axenic_Amastigote=9;
LmxM.00	MF_V1	SLAS	651793	651794	.	-	.	ID=LmxM.33.1830_SLAS_103;Promastigote=238;Intracellular_Amastigote=1794;Axenic_Amastigote=666;
LmxM.00	MF_V1	SLAS	666057	666058	.	-	.	ID=LmxM.33.1830_SLAS_102;Promastigote=13;Intracellular_Amastigote=32;Axenic_Amastigote=27;
LmxM.00	MF_V1	SLAS	666064	666065	.	-	.	ID=LmxM.33.1830_SLAS_101;Promastigote=94;Intracellular_Amastigote=291;Axenic_Amastigote=262;
LmxM.00	MF_V1	SLAS	666067	666068	.	-	.	ID=LmxM.33.1830_SLAS_100;Promastigote=245;Intracellular_Amastigote=385;Axenic_Amastigote=413;
LmxM.00	MF_V1	SLAS	685217	685218	.	-	.	ID=LmxM.33.1830_SLAS_99;Promastigote=5;Intracellular_Amastigote=40;Axenic_Amastigote=11;
LmxM.00	MF_V1	SLAS	685220	685221	.	-	.	ID=LmxM.33.1830_SLAS_98;Promastigote=1;Intracellular_Amastigote=11;Axenic_Amastigote=15;
LmxM.00	MF_V1	SLAS	685224	685225	.	-	.	ID=LmxM.33.1830_SLAS_97;Promastigote=55;Intracellular_Amastigote=523;Axenic_Amastigote=326;
LmxM.00	MF_V1	SLAS	685260	685261	.	-	.	ID=LmxM.33.1830_SLAS_96;Promastigote=6;Intracellular_Amastigote=5;Axenic_Amastigote=18;
LmxM.00	MF_V1	SLAS	690296	690297	.	-	.	ID=LmxM.33.1830_SLAS_95;Promastigote=0;Intracellular_Amastigote=23;Axenic_Amastigote=19;
LmxM.00	MF_V1	SLAS	690303	690304	.	-	.	ID=LmxM.33.1830_SLAS_94;Promastigote=62;Intracellular_Amastigote=870;Axenic_Amastigote=664;
LmxM.00	MF_V1	SLAS	690339	690340	.	-	.	ID=LmxM.33.1830_SLAS_93;Promastigote=2;Intracellular_Amastigote=14;Axenic_Amastigote=10;
LmxM.00	MF_V1	SLAS	692178	692179	.	-	.	ID=LmxM.33.1830_SLAS_92;Promastigote=10;Intracellular_Amastigote=18;Axenic_Amastigote=40;
LmxM.00	MF_V1	SLAS	716897	716898	.	-	.	ID=LmxM.33.1830_SLAS_91;Promastigote=6;Intracellular_Amastigote=1;Axenic_Amastigote=3;
LmxM.00	MF_V1	SLAS	716905	716906	.	-	.	ID=LmxM.33.1830_SLAS_90;Promastigote=825;Intracellular_Amastigote=211;Axenic_Amastigote=739;
LmxM.00	MF_V1	SLAS	752067	752068	.	-	.	ID=LmxM.33.1830_SLAS_89;Promastigote=61;Intracellular_Amastigote=147;Axenic_Amastigote=232;
LmxM.00	MF_V1	SLAS	752104	752105	.	-	.	ID=LmxM.33.1830_SLAS_88;Promastigote=26;Intracellular_Amastigote=21;Axenic_Amastigote=75;
LmxM.00	MF_V1	SLAS	752171	752172	.	-	.	ID=LmxM.33.1830_SLAS_87;Promastigote=2;Intracellular_Amastigote=4;Axenic_Amastigote=6;
LmxM.00	MF_V1	SLAS	752751	752752	.	-	.	ID=LmxM.33.1830_SLAS_86;Promastigote=26;Intracellular_Amastigote=12;Axenic_Amastigote=55;
LmxM.00	MF_V1	SLAS	752803	752804	.	-	.	ID=LmxM.33.1830_SLAS_85;Promastigote=3;Intracellular_Amastigote=0;Axenic_Amastigote=6;
LmxM.00	MF_V1	SLAS	753158	753159	.	-	.	ID=LmxM.33.1830_SLAS_84;Promastigote=1;Intracellular_Amastigote=0;Axenic_Amastigote=11;
LmxM.00	MF_V1	SLAS	762204	762205	.	-	.	ID=LmxM.33.1830_SLAS_83;Promastigote=12;Intracellular_Amastigote=11;Axenic_Amastigote=14;
LmxM.00	MF_V1	SLAS	762614	762615	.	-	.	ID=LmxM.33.1830_SLAS_82;Promastigote=48;Intracellular_Amastigote=16;Axenic_Amastigote=83;
LmxM.00	MF_V1	SLAS	774202	774203	.	-	.	ID=LmxM.33.1830_SLAS_81;Promastigote=1;Intracellular_Amastigote=4;Axenic_Amastigote=5;
LmxM.00	MF_V1	SLAS	788835	788836	.	-	.	ID=LmxM.33.1830_SLAS_80;Promastigote=0;Intracellular_Amastigote=4;Axenic_Amastigote=5;
LmxM.00	MF_V1	SLAS	788875	788876	.	-	.	ID=LmxM.33.1830_SLAS_79;Promastigote=80;Intracellular_Amastigote=55;Axenic_Amastigote=117;
LmxM.00	MF_V1	SLAS	793028	793029	.	-	.	ID=LmxM.33.1830_SLAS_78;Promastigote=4;Intracellular_Amastigote=3;Axenic_Amastigote=5;
LmxM.00	MF_V1	SLAS	793031	793032	.	-	.	ID=LmxM.33.1830_SLAS_77;Promastigote=39;Intracellular_Amastigote=44;Axenic_Amastigote=55;
LmxM.00	MF_V1	SLAS	820723	820724	.	-	.	ID=LmxM.33.1830_SLAS_76;Promastigote=8;Intracellular_Amastigote=22;Axenic_Amastigote=35;
LmxM.00	MF_V1	SLAS	820726	820727	.	-	.	ID=LmxM.33.1830_SLAS_75;Promastigote=6;Intracellular_Amastigote=2;Axenic_Amastigote=6;
LmxM.00	MF_V1	SLAS	828995	828996	.	-	.	ID=LmxM.33.1830_SLAS_74;Promastigote=64;Intracellular_Amastigote=27;Axenic_Amastigote=74;
LmxM.00	MF_V1	SLAS	835750	835751	.	-	.	ID=LmxM.33.1830_SLAS_73;Promastigote=4;Intracellular_Amastigote=2;Axenic_Amastigote=5;
LmxM.00	MF_V1	SLAS	835758	835759	.	-	.	ID=LmxM.33.1830_SLAS_72;Promastigote=832;Intracellular_Amastigote=218;Axenic_Amastigote=793;
LmxM.00	MF_V1	SLAS	847275	847276	.	-	.	ID=LmxM.33.1830_SLAS_71;Promastigote=13;Intracellular_Amastigote=170;Axenic_Amastigote=106;
LmxM.00	MF_V1	SLAS	850798	850799	.	-	.	ID=LmxM.33.1830_SLAS_70;Promastigote=2;Intracellular_Amastigote=0;Axenic_Amastigote=9;
LmxM.00	MF_V1	SLAS	850823	850824	.	-	.	ID=LmxM.33.1830_SLAS_69;Promastigote=108;Intracellular_Amastigote=86;Axenic_Amastigote=516;
LmxM.00	MF_V1	SLAS	860891	860892	.	-	.	ID=LmxM.33.1830_SLAS_68;Promastigote=0;Intracellular_Amastigote=9;Axenic_Amastigote=1;
LmxM.00	MF_V1	SLAS	865299	865300	.	-	.	ID=LmxM.33.1830_SLAS_67;Promastigote=7;Intracellular_Amastigote=170;Axenic_Amastigote=142;
LmxM.00	MF_V1	SLAS	876480	876481	.	-	.	ID=LmxM.33.1830_SLAS_66;Promastigote=4;Intracellular_Amastigote=34;Axenic_Amastigote=26;
LmxM.00	MF_V1	SLAS	876508	876509	.	-	.	ID=LmxM.33.1830_SLAS_65;Promastigote=0;Intracellular_Amastigote=10;Axenic_Amastigote=4;
LmxM.00	MF_V1	SLAS	876511	876512	.	-	.	ID=LmxM.33.1830_SLAS_64;Promastigote=3;Intracellular_Amastigote=27;Axenic_Amastigote=9;
LmxM.00	MF_V1	SLAS	876597	876598	.	-	.	ID=LmxM.33.1830_SLAS_63;Promastigote=1;Intracellular_Amastigote=8;Axenic_Amastigote=2;
LmxM.00	MF_V1	SLAS	879942	879943	.	-	.	ID=LmxM.33.1830_SLAS_62;Promastigote=9;Intracellular_Amastigote=166;Axenic_Amastigote=105;
LmxM.00	MF_V1	SLAS	887889	887890	.	-	.	ID=LmxM.33.1830_SLAS_61;Promastigote=63;Intracellular_Amastigote=54;Axenic_Amastigote=186;
LmxM.00	MF_V1	SLAS	887929	887930	.	-	.	ID=LmxM.33.1830_SLAS_60;Promastigote=417;Intracellular_Amastigote=284;Axenic_Amastigote=622;
LmxM.00	MF_V1	SLAS	889743	889744	.	-	.	ID=LmxM.33.1830_SLAS_59;Promastigote=0;Intracellular_Amastigote=3;Axenic_Amastigote=6;
LmxM.00	MF_V1	SLAS	904049	904050	.	-	.	ID=LmxM.33.1830_SLAS_58;Promastigote=12;Intracellular_Amastigote=3;Axenic_Amastigote=18;
LmxM.00	MF_V1	SLAS	904287	904288	.	-	.	ID=LmxM.33.1830_SLAS_57;Promastigote=7;Intracellular_Amastigote=0;Axenic_Amastigote=5;
LmxM.00	MF_V1	SLAS	904290	904291	.	-	.	ID=LmxM.33.1830_SLAS_56;Promastigote=10;Intracellular_Amastigote=1;Axenic_Amastigote=5;
LmxM.00	MF_V1	SLAS	904404	904405	.	-	.	ID=LmxM.33.1830_SLAS_55;Promastigote=17;Intracellular_Amastigote=24;Axenic_Amastigote=31;
LmxM.00	MF_V1	SLAS	904407	904408	.	-	.	ID=LmxM.33.1830_SLAS_54;Promastigote=15;Intracellular_Amastigote=19;Axenic_Amastigote=13;
LmxM.00	MF_V1	SLAS	907049	907050	.	-	.	ID=LmxM.33.1830_SLAS_53;Promastigote=5;Intracellular_Amastigote=5;Axenic_Amastigote=6;
LmxM.00	MF_V1	SLAS	907078	907079	.	-	.	ID=LmxM.33.1830_SLAS_52;Promastigote=98;Intracellular_Amastigote=97;Axenic_Amastigote=101;
LmxM.00	MF_V1	SLAS	927866	927867	.	-	.	ID=LmxM.33.1830_SLAS_51;Promastigote=4;Intracellular_Amastigote=1;Axenic_Amastigote=12;
LmxM.00	MF_V1	SLAS	927874	927875	.	-	.	ID=LmxM.33.1830_SLAS_50;Promastigote=160;Intracellular_Amastigote=84;Axenic_Amastigote=175;
LmxM.00	MF_V1	SLAS	941292	941293	.	-	.	ID=LmxM.33.1830_SLAS_49;Promastigote=1;Intracellular_Amastigote=5;Axenic_Amastigote=9;
LmxM.00	MF_V1	SLAS	941296	941297	.	-	.	ID=LmxM.33.1830_SLAS_48;Promastigote=27;Intracellular_Amastigote=46;Axenic_Amastigote=72;
LmxM.00	MF_V1	SLAS	943847	943848	.	-	.	ID=LmxM.33.1830_SLAS_47;Promastigote=6;Intracellular_Amastigote=1;Axenic_Amastigote=8;
LmxM.00	MF_V1	SLAS	943857	943858	.	-	.	ID=LmxM.33.1830_SLAS_46;Promastigote=175;Intracellular_Amastigote=18;Axenic_Amastigote=122;
LmxM.00	MF_V1	SLAS	944396	944397	.	-	.	ID=LmxM.33.1830_SLAS_45;Promastigote=6;Intracellular_Amastigote=3;Axenic_Amastigote=15;
LmxM.00	MF_V1	SLAS	959223	959224	.	-	.	ID=LmxM.33.1830_SLAS_44;Promastigote=4;Intracellular_Amastigote=0;Axenic_Amastigote=8;
LmxM.00	MF_V1	SLAS	959236	959237	.	-	.	ID=LmxM.33.1830_SLAS_43;Promastigote=533;Intracellular_Amastigote=123;Axenic_Amastigote=712;
LmxM.00	MF_V1	SLAS	959277	959278	.	-	.	ID=LmxM.33.1830_SLAS_42;Promastigote=5;Intracellular_Amastigote=1;Axenic_Amastigote=3;
LmxM.00	MF_V1	SLAS	998620	998621	.	-	.	ID=LmxM.33.1830_SLAS_41;Promastigote=393;Intracellular_Amastigote=123;Axenic_Amastigote=329;
LmxM.00	MF_V1	SLAS	1002879	1002880	.	-	.	ID=LmxM.33.1830_SLAS_40;Promastigote=0;Intracellular_Amastigote=7;Axenic_Amastigote=4;
LmxM.00	MF_V1	SLAS	1012572	1012573	.	-	.	ID=LmxM.33.1830_SLAS_39;Promastigote=0;Intracellular_Amastigote=29;Axenic_Amastigote=29;
LmxM.00	MF_V1	SLAS	1012587	1012588	.	-	.	ID=LmxM.33.1830_SLAS_38;Promastigote=55;Intracellular_Amastigote=558;Axenic_Amastigote=394;
LmxM.00	MF_V1	SLAS	1014401	1014402	.	-	.	ID=LmxM.33.1830_SLAS_37;Promastigote=11;Intracellular_Amastigote=11;Axenic_Amastigote=19;
LmxM.00	MF_V1	SLAS	1014425	1014426	.	-	.	ID=LmxM.33.1830_SLAS_36;Promastigote=51;Intracellular_Amastigote=78;Axenic_Amastigote=29;
LmxM.00	MF_V1	SLAS	1020637	1020638	.	-	.	ID=LmxM.33.1830_SLAS_35;Promastigote=1;Intracellular_Amastigote=13;Axenic_Amastigote=16;
LmxM.00	MF_V1	SLAS	1020773	1020774	.	-	.	ID=LmxM.33.1830_SLAS_34;Promastigote=2;Intracellular_Amastigote=83;Axenic_Amastigote=71;
LmxM.00	MF_V1	SLAS	1020776	1020777	.	-	.	ID=LmxM.33.1830_SLAS_33;Promastigote=7;Intracellular_Amastigote=51;Axenic_Amastigote=50;
LmxM.00	MF_V1	SLAS	1020780	1020781	.	-	.	ID=LmxM.33.1830_SLAS_32;Promastigote=2;Intracellular_Amastigote=8;Axenic_Amastigote=12;
LmxM.00	MF_V1	SLAS	1020816	1020817	.	-	.	ID=LmxM.33.1830_SLAS_31;Promastigote=7;Intracellular_Amastigote=16;Axenic_Amastigote=17;
LmxM.00	MF_V1	SLAS	1020962	1020963	.	-	.	ID=LmxM.33.1830_SLAS_30;Promastigote=5;Intracellular_Amastigote=9;Axenic_Amastigote=8;
LmxM.00	MF_V1	SLAS	1020966	1020967	.	-	.	ID=LmxM.33.1830_SLAS_29;Promastigote=0;Intracellular_Amastigote=6;Axenic_Amastigote=3;
LmxM.00	MF_V1	SLAS	1020968	1020969	.	-	.	ID=LmxM.33.1830_SLAS_28;Promastigote=3;Intracellular_Amastigote=8;Axenic_Amastigote=19;
LmxM.00	MF_V1	SLAS	1022498	1022499	.	-	.	ID=LmxM.33.1830_SLAS_27;Promastigote=5;Intracellular_Amastigote=2;Axenic_Amastigote=9;
LmxM.00	MF_V1	SLAS	1027802	1027803	.	-	.	ID=LmxM.33.1830_SLAS_26;Promastigote=16;Intracellular_Amastigote=173;Axenic_Amastigote=171;
LmxM.00	MF_V1	SLAS	1027809	1027810	.	-	.	ID=LmxM.33.1830_SLAS_25;Promastigote=369;Intracellular_Amastigote=3145;Axenic_Amastigote=2272;
LmxM.00	MF_V1	SLAS	1027845	1027846	.	-	.	ID=LmxM.33.1830_SLAS_24;Promastigote=5;Intracellular_Amastigote=17;Axenic_Amastigote=20;
LmxM.00	MF_V1	SLAS	1027986	1027987	.	-	.	ID=LmxM.33.1830_SLAS_23;Promastigote=0;Intracellular_Amastigote=1;Axenic_Amastigote=8;
LmxM.00	MF_V1	SLAS	1027991	1027992	.	-	.	ID=LmxM.33.1830_SLAS_22;Promastigote=2;Intracellular_Amastigote=5;Axenic_Amastigote=7;
LmxM.00	MF_V1	SLAS	1027997	1027998	.	-	.	ID=LmxM.33.1830_SLAS_21;Promastigote=1;Intracellular_Amastigote=3;Axenic_Amastigote=7;
LmxM.00	MF_V1	SLAS	1037079	1037080	.	-	.	ID=LmxM.33.1830_SLAS_20;Promastigote=4;Intracellular_Amastigote=11;Axenic_Amastigote=10;
LmxM.00	MF_V1	SLAS	1059439	1059440	.	-	.	ID=LmxM.33.1830_SLAS_19;Promastigote=2;Intracellular_Amastigote=3;Axenic_Amastigote=4;
LmxM.00	MF_V1	SLAS	1081427	1081428	.	-	.	ID=LmxM.33.1830_SLAS_18;Promastigote=0;Intracellular_Amastigote=4;Axenic_Amastigote=5;
LmxM.00	MF_V1	SLAS	1083828	1083829	.	-	.	ID=LmxM.33.1830_SLAS_17;Promastigote=10;Intracellular_Amastigote=2;Axenic_Amastigote=14;
LmxM.00	MF_V1	SLAS	1089297	1089298	.	-	.	ID=LmxM.33.1830_SLAS_16;Promastigote=6;Intracellular_Amastigote=1;Axenic_Amastigote=8;
LmxM.00	MF_V1	SLAS	1089305	1089306	.	-	.	ID=LmxM.33.1830_SLAS_15;Promastigote=809;Intracellular_Amastigote=236;Axenic_Amastigote=792;
LmxM.00	MF_V1	SLAS	1105952	1105953	.	-	.	ID=LmxM.33.1830_SLAS_14;Promastigote=1;Intracellular_Amastigote=18;Axenic_Amastigote=13;
LmxM.00	MF_V1	SLAS	1106104	1106105	.	-	.	ID=LmxM.33.1830_SLAS_13;Promastigote=1;Intracellular_Amastigote=41;Axenic_Amastigote=17;
LmxM.00	MF_V1	SLAS	1106107	1106108	.	-	.	ID=LmxM.33.1830_SLAS_12;Promastigote=1;Intracellular_Amastigote=19;Axenic_Amastigote=16;
LmxM.00	MF_V1	SLAS	1106111	1106112	.	-	.	ID=LmxM.33.1830_SLAS_11;Promastigote=76;Intracellular_Amastigote=483;Axenic_Amastigote=375;
LmxM.00	MF_V1	SLAS	1106147	1106148	.	-	.	ID=LmxM.33.1830_SLAS_10;Promastigote=2;Intracellular_Amastigote=5;Axenic_Amastigote=12;
LmxM.00	MF_V1	SLAS	1141890	1141891	.	-	.	ID=LmxM.33.1830_SLAS_9;Promastigote=5;Intracellular_Amastigote=0;Axenic_Amastigote=6;
LmxM.00	MF_V1	SLAS	1142536	1142537	.	-	.	ID=LmxM.33.1830_SLAS_8;Promastigote=4;Intracellular_Amastigote=0;Axenic_Amastigote=6;
LmxM.00	MF_V1	SLAS	1142603	1142604	.	-	.	ID=LmxM.33.1830_SLAS_7;Promastigote=4;Intracellular_Amastigote=4;Axenic_Amastigote=5;
LmxM.00	MF_V1	SLAS	1150344	1150345	.	-	.	ID=LmxM.33.1830_SLAS_6;Promastigote=15;Intracellular_Amastigote=10;Axenic_Amastigote=23;
LmxM.00	MF_V1	SLAS	1150717	1150718	.	-	.	ID=LmxM.33.1830_SLAS_5;Promastigote=2;Intracellular_Amastigote=6;Axenic_Amastigote=9;
LmxM.00	MF_V1	SLAS	1154063	1154064	.	-	.	ID=LmxM.33.1830_SLAS_4;Promastigote=3;Intracellular_Amastigote=6;Axenic_Amastigote=2;
LmxM.00	MF_V1	SLAS	1154102	1154103	.	-	.	ID=LmxM.33.1830_SLAS_3;Promastigote=24;Intracellular_Amastigote=75;Axenic_Amastigote=60;
LmxM.00	MF_V1	SLAS	1168978	1168979	.	-	.	ID=LmxM.33.1830_SLAS_2;Promastigote=1;Intracellular_Amastigote=1;Axenic_Amastigote=9;
LmxM.00	MF_V1	SLAS	1169000	1169001	.	-	.	ID=LmxM.33.1830_SLAS_1;Promastigote=414;Intracellular_Amastigote=146;Axenic_Amastigote=1085;
LmxM.01	MF_V1	SLAS	5178	5179	.	-	.	ID=LmxM.01.0010_SLAS_3;Promastigote=7;Intracellular_Amastigote=1;Axenic_Amastigote=20;
LmxM.01	MF_V1	SLAS	5191	5192	.	-	.	ID=LmxM.01.0010_SLAS_2;Promastigote=5;Intracellular_Amastigote=1;Axenic_Amastigote=5;
LmxM.01	MF_V1	SLAS	5324	5325	.	-	.	ID=LmxM.01.0010_SLAS_1;Promastigote=6;Intracellular_Amastigote=6;Axenic_Amastigote=4;
LmxM.01	MF_V1	SLAS	7750	7751	.	-	.	ID=LmxM.01.0020_SLAS_2;Promastigote=21;Intracellular_Amastigote=9;Axenic_Amastigote=27;
LmxM.01	MF_V1	SLAS	7834	7835	.	-	.	ID=LmxM.01.0020_SLAS_1;Promastigote=167;Intracellular_Amastigote=64;Axenic_Amastigote=344;
LmxM.01	MF_V1	SLAS	11802	11803	.	-	.	ID=LmxM.01.0030_SLAS_1;Promastigote=229;Intracellular_Amastigote=81;Axenic_Amastigote=227;
LmxM.01	MF_V1	SLAS	12953	12954	.	-	.	ID=LmxM.01.0040_SLAS_6;Promastigote=4;Intracellular_Amastigote=0;Axenic_Amastigote=5;
LmxM.01	MF_V1	SLAS	13004	13005	.	-	.	ID=LmxM.01.0040_SLAS_5;Promastigote=1;Intracellular_Amastigote=2;Axenic_Amastigote=6;
LmxM.01	MF_V1	SLAS	13042	13043	.	-	.	ID=LmxM.01.0040_SLAS_4;Promastigote=64;Intracellular_Amastigote=64;Axenic_Amastigote=106;
LmxM.01	MF_V1	SLAS	13097	13098	.	-	.	ID=LmxM.01.0040_SLAS_3;Promastigote=15;Intracellular_Amastigote=5;Axenic_Amastigote=16;
LmxM.01	MF_V1	SLAS	13152	13153	.	-	.	ID=LmxM.01.0040_SLAS_2;Promastigote=26;Intracellular_Amastigote=9;Axenic_Amastigote=15;
LmxM.01	MF_V1	SLAS	13238	13239	.	-	.	ID=LmxM.01.0040_SLAS_1;Promastigote=5;Intracellular_Amastigote=5;Axenic_Amastigote=11;
LmxM.01	MF_V1	SLAS	17130	17131	.	-	.	ID=LmxM.01.0050_SLAS_2;Promastigote=29;Intracellular_Amastigote=8;Axenic_Amastigote=45;
LmxM.01	MF_V1	SLAS	17341	17342	.	-	.	ID=LmxM.01.0050_SLAS_1;Promastigote=7;Intracellular_Amastigote=3;Axenic_Amastigote=7;
LmxM.01	MF_V1	SLAS	19061	19062	.	-	.	ID=LmxM.01.0060_SLAS_3;Promastigote=5;Intracellular_Amastigote=6;Axenic_Amastigote=5;
LmxM.01	MF_V1	SLAS	19092	19093	.	-	.	ID=LmxM.01.0060_SLAS_2;Promastigote=58;Intracellular_Amastigote=5;Axenic_Amastigote=107;
LmxM.01	MF_V1	SLAS	19364	19365	.	-	.	ID=LmxM.01.0060_SLAS_1;Promastigote=3;Intracellular_Amastigote=3;Axenic_Amastigote=12;
LmxM.01	MF_V1	SLAS	21681	21682	.	-	.	ID=LmxM.01.0070_SLAS_4;Promastigote=6;Intracellular_Amastigote=2;Axenic_Amastigote=7;
LmxM.01	MF_V1	SLAS	21958	21959	.	-	.	ID=LmxM.01.0070_SLAS_3;Promastigote=7;Intracellular_Amastigote=7;Axenic_Amastigote=11;
LmxM.01	MF_V1	SLAS	22033	22034	.	-	.	ID=LmxM.01.0070_SLAS_2;Promastigote=2;Intracellular_Amastigote=0;Axenic_Amastigote=9;
LmxM.01	MF_V1	SLAS	22044	22045	.	-	.	ID=LmxM.01.0070_SLAS_1;Promastigote=81;Intracellular_Amastigote=15;Axenic_Amastigote=56;
LmxM.01	MF_V1	SLAS	23426	23427	.	-	.	ID=LmxM.01.0080_SLAS_3;Promastigote=143;Intracellular_Amastigote=153;Axenic_Amastigote=248;
LmxM.01	MF_V1	SLAS	23434	23435	.	-	.	ID=LmxM.01.0080_SLAS_2;Promastigote=47;Intracellular_Amastigote=66;Axenic_Amastigote=76;
LmxM.01	MF_V1	SLAS	23469	23470	.	-	.	ID=LmxM.01.0080_SLAS_1;Promastigote=8;Intracellular_Amastigote=6;Axenic_Amastigote=6;
LmxM.01	MF_V1	SLAS	25388	25389	.	-	.	ID=LmxM.01.0090_SLAS_1;Promastigote=15;Intracellular_Amastigote=11;Axenic_Amastigote=29;
LmxM.01	MF_V1	SLAS	27026	27027	.	-	.	ID=LmxM.01.0100_SLAS_1;Promastigote=26;Intracellular_Amastigote=12;Axenic_Amastigote=36;
LmxM.01	MF_V1	SLAS	28550	28551	.	-	.	ID=LmxM.01.0110_SLAS_2;Promastigote=5;Intracellular_Amastigote=0;Axenic_Amastigote=5;
LmxM.01	MF_V1	SLAS	28672	28673	.	-	.	ID=LmxM.01.0110_SLAS_1;Promastigote=329;Intracellular_Amastigote=56;Axenic_Amastigote=286;
LmxM.01	MF_V1	SLAS	31689	31690	.	-	.	ID=LmxM.01.0120_SLAS_2;Promastigote=2;Intracellular_Amastigote=6;Axenic_Amastigote=4;
LmxM.01	MF_V1	SLAS	31692	31693	.	-	.	ID=LmxM.01.0120_SLAS_1;Promastigote=36;Intracellular_Amastigote=35;Axenic_Amastigote=56;
LmxM.01	MF_V1	SLAS	34006	34007	.	-	.	ID=LmxM.01.0130_SLAS_1;Promastigote=31;Intracellular_Amastigote=13;Axenic_Amastigote=35;
LmxM.01	MF_V1	SLAS	37156	37157	.	-	.	ID=LmxM.01.0150_SLAS_1;Promastigote=152;Intracellular_Amastigote=72;Axenic_Amastigote=210;
LmxM.01	MF_V1	SLAS	38177	38178	.	-	.	ID=LmxM.01.0160_SLAS_1;Promastigote=33;Intracellular_Amastigote=42;Axenic_Amastigote=52;
LmxM.01	MF_V1	SLAS	42093	42094	.	-	.	ID=LmxM.01.0170_SLAS_1;Promastigote=18;Intracellular_Amastigote=15;Axenic_Amastigote=22;
LmxM.01	MF_V1	SLAS	45485	45486	.	-	.	ID=LmxM.01.0180_SLAS_3;Promastigote=14;Intracellular_Amastigote=6;Axenic_Amastigote=18;
LmxM.01	MF_V1	SLAS	45518	45519	.	-	.	ID=LmxM.01.0180_SLAS_2;Promastigote=41;Intracellular_Amastigote=11;Axenic_Amastigote=69;
LmxM.01	MF_V1	SLAS	45526	45527	.	-	.	ID=LmxM.01.0180_SLAS_1;Promastigote=9;Intracellular_Amastigote=4;Axenic_Amastigote=16;
LmxM.01	MF_V1	SLAS	46760	46761	.	-	.	ID=LmxM.01.0190_SLAS_3;Promastigote=1;Intracellular_Amastigote=9;Axenic_Amastigote=3;
LmxM.01	MF_V1	SLAS	46789	46790	.	-	.	ID=LmxM.01.0190_SLAS_2;Promastigote=4;Intracellular_Amastigote=10;Axenic_Amastigote=8;
LmxM.01	MF_V1	SLAS	46820	46821	.	-	.	ID=LmxM.01.0190_SLAS_1;Promastigote=68;Intracellular_Amastigote=36;Axenic_Amastigote=85;
LmxM.01	MF_V1	SLAS	48484	48485	.	-	.	ID=LmxM.01.0200_SLAS_1;Promastigote=63;Intracellular_Amastigote=37;Axenic_Amastigote=119;
LmxM.01	MF_V1	SLAS	52279	52280	.	-	.	ID=LmxM.01.0210_SLAS_2;Promastigote=11;Intracellular_Amastigote=5;Axenic_Amastigote=8;
LmxM.01	MF_V1	SLAS	52282	52283	.	-	.	ID=LmxM.01.0210_SLAS_1;Promastigote=1;Intracellular_Amastigote=1;Axenic_Amastigote=8;
LmxM.01	MF_V1	SLAS	54052	54053	.	-	.	ID=LmxM.01_53687_SLAS_5;Promastigote=3;Intracellular_Amastigote=3;Axenic_Amastigote=3;
LmxM.01	MF_V1	SLAS	54093	54094	.	-	.	ID=LmxM.01_53687_SLAS_4;Promastigote=79;Intracellular_Amastigote=62;Axenic_Amastigote=160;
LmxM.01	MF_V1	SLAS	54185	54186	.	-	.	ID=LmxM.01_53687_SLAS_3;Promastigote=9;Intracellular_Amastigote=7;Axenic_Amastigote=20;
LmxM.01	MF_V1	SLAS	54283	54284	.	-	.	ID=LmxM.01_53687_SLAS_2;Promastigote=10;Intracellular_Amastigote=12;Axenic_Amastigote=31;
LmxM.01	MF_V1	SLAS	54296	54297	.	-	.	ID=LmxM.01_53687_SLAS_1;Promastigote=13;Intracellular_Amastigote=6;Axenic_Amastigote=17;
LmxM.01	MF_V1	SLAS	56335	56336	.	-	.	ID=LmxM.01.0220_SLAS_1;Promastigote=49;Intracellular_Amastigote=14;Axenic_Amastigote=59;
LmxM.01	MF_V1	SLAS	58080	58081	.	-	.	ID=LmxM.01_57483_SLAS_3;Promastigote=4;Intracellular_Amastigote=2;Axenic_Amastigote=9;
LmxM.01	MF_V1	SLAS	58093	58094	.	-	.	ID=LmxM.01_57483_SLAS_2;Promastigote=123;Intracellular_Amastigote=34;Axenic_Amastigote=186;
LmxM.01	MF_V1	SLAS	58344	58345	.	-	.	ID=LmxM.01_57483_SLAS_1;Promastigote=8;Intracellular_Amastigote=11;Axenic_Amastigote=17;
LmxM.01	MF_V1	SLAS	59871	59872	.	-	.	ID=LmxM.01.0230_SLAS_5;Promastigote=4;Intracellular_Amastigote=4;Axenic_Amastigote=9;
LmxM.01	MF_V1	SLAS	59889	59890	.	-	.	ID=LmxM.01.0230_SLAS_4;Promastigote=4;Intracellular_Amastigote=3;Axenic_Amastigote=7;
LmxM.01	MF_V1	SLAS	59900	59901	.	-	.	ID=LmxM.01.0230_SLAS_3;Promastigote=3;Intracellular_Amastigote=11;Axenic_Amastigote=16;
LmxM.01	MF_V1	SLAS	59959	59960	.	-	.	ID=LmxM.01.0230_SLAS_2;Promastigote=41;Intracellular_Amastigote=30;Axenic_Amastigote=50;
LmxM.01	MF_V1	SLAS	59965	59966	.	-	.	ID=LmxM.01.0230_SLAS_1;Promastigote=452;Intracellular_Amastigote=323;Axenic_Amastigote=494;
LmxM.01	MF_V1	SLAS	63483	63484	.	-	.	ID=LmxM.01.0240_SLAS_1;Promastigote=316;Intracellular_Amastigote=261;Axenic_Amastigote=550;
LmxM.01	MF_V1	SLAS	66763	66764	.	-	.	ID=LmxM.01.0250_SLAS_3;Promastigote=5;Intracellular_Amastigote=0;Axenic_Amastigote=7;
LmxM.01	MF_V1	SLAS	66780	66781	.	-	.	ID=LmxM.01.0250_SLAS_2;Promastigote=2;Intracellular_Amastigote=4;Axenic_Amastigote=6;
LmxM.01	MF_V1	SLAS	66861	66862	.	-	.	ID=LmxM.01.0250_SLAS_1;Promastigote=2;Intracellular_Amastigote=4;Axenic_Amastigote=11;
LmxM.01	MF_V1	SLAS	68383	68384	.	-	.	ID=LmxM.01.0260_SLAS_3;Promastigote=8;Intracellular_Amastigote=5;Axenic_Amastigote=16;
LmxM.01	MF_V1	SLAS	68389	68390	.	-	.	ID=LmxM.01.0260_SLAS_2;Promastigote=113;Intracellular_Amastigote=59;Axenic_Amastigote=206;
LmxM.01	MF_V1	SLAS	68492	68493	.	-	.	ID=LmxM.01.0260_SLAS_1;Promastigote=56;Intracellular_Amastigote=23;Axenic_Amastigote=71;
LmxM.01	MF_V1	SLAS	70236	70237	.	-	.	ID=LmxM.01.0270_SLAS_2;Promastigote=6;Intracellular_Amastigote=15;Axenic_Amastigote=25;
LmxM.01	MF_V1	SLAS	70240	70241	.	-	.	ID=LmxM.01.0270_SLAS_1;Promastigote=206;Intracellular_Amastigote=188;Axenic_Amastigote=324;
LmxM.01	MF_V1	SLAS	72544	72545	.	-	.	ID=LmxM.01.0280_SLAS_1;Promastigote=36;Intracellular_Amastigote=47;Axenic_Amastigote=44;
LmxM.01	MF_V1	SLAS	74192	74193	.	-	.	ID=LmxM.01.0290_SLAS_2;Promastigote=103;Intracellular_Amastigote=110;Axenic_Amastigote=171;
LmxM.01	MF_V1	SLAS	74274	74275	.	-	.	ID=LmxM.01.0290_SLAS_1;Promastigote=4;Intracellular_Amastigote=8;Axenic_Amastigote=17;
LmxM.01	MF_V1	SLAS	75182	75183	.	-	.	ID=LmxM.01.0300_SLAS_3;Promastigote=2;Intracellular_Amastigote=0;Axenic_Amastigote=7;
LmxM.01	MF_V1	SLAS	75187	75188	.	-	.	ID=LmxM.01.0300_SLAS_2;Promastigote=80;Intracellular_Amastigote=30;Axenic_Amastigote=185;
LmxM.01	MF_V1	SLAS	75190	75191	.	-	.	ID=LmxM.01.0300_SLAS_1;Promastigote=597;Intracellular_Amastigote=262;Axenic_Amastigote=1013;
LmxM.01	MF_V1	SLAS	76476	76477	.	-	.	ID=LmxM.01.0310_SLAS_2;Promastigote=0;Intracellular_Amastigote=5;Axenic_Amastigote=5;
LmxM.01	MF_V1	SLAS	76838	76839	.	-	.	ID=LmxM.01.0310_SLAS_1;Promastigote=42;Intracellular_Amastigote=37;Axenic_Amastigote=76;
LmxM.01	MF_V1	SLAS	77652	77653	.	-	.	ID=LmxM.01.0315_SLAS_2;Promastigote=4;Intracellular_Amastigote=4;Axenic_Amastigote=3;
LmxM.01	MF_V1	SLAS	77669	77670	.	-	.	ID=LmxM.01.0315_SLAS_1;Promastigote=7;Intracellular_Amastigote=4;Axenic_Amastigote=12;
LmxM.01	MF_V1	SLAS	78397	78398	.	+	.	ID=LmxM.01.0320_SLAS_1;Promastigote=69;Intracellular_Amastigote=41;Axenic_Amastigote=120;
LmxM.01	MF_V1	SLAS	79925	79926	.	+	.	ID=LmxM.01.0330_SLAS_1;Promastigote=12;Intracellular_Amastigote=41;Axenic_Amastigote=26;
LmxM.01	MF_V1	SLAS	79930	79931	.	+	.	ID=LmxM.01.0330_SLAS_2;Promastigote=3;Intracellular_Amastigote=17;Axenic_Amastigote=14;
LmxM.01	MF_V1	SLAS	79951	79952	.	+	.	ID=LmxM.01.0330_SLAS_3;Promastigote=2;Intracellular_Amastigote=9;Axenic_Amastigote=6;
LmxM.01	MF_V1	SLAS	81088	81089	.	+	.	ID=LmxM.01.0335_SLAS_1;Promastigote=92;Intracellular_Amastigote=28;Axenic_Amastigote=111;
LmxM.01	MF_V1	SLAS	81091	81092	.	+	.	ID=LmxM.01.0335_SLAS_2;Promastigote=12;Intracellular_Amastigote=2;Axenic_Amastigote=8;
LmxM.01	MF_V1	SLAS	82359	82360	.	+	.	ID=LmxM.01.0340_SLAS_1;Promastigote=14;Intracellular_Amastigote=15;Axenic_Amastigote=27;
LmxM.01	MF_V1	SLAS	84283	84284	.	+	.	ID=LmxM.01.0350_SLAS_1;Promastigote=45;Intracellular_Amastigote=30;Axenic_Amastigote=61;
LmxM.01	MF_V1	SLAS	87998	87999	.	+	.	ID=LmxM.01.0360_SLAS_1;Promastigote=281;Intracellular_Amastigote=288;Axenic_Amastigote=420;
LmxM.01	MF_V1	SLAS	88024	88025	.	+	.	ID=LmxM.01.0360_SLAS_2;Promastigote=5;Intracellular_Amastigote=2;Axenic_Amastigote=13;
LmxM.01	MF_V1	SLAS	89294	89295	.	+	.	ID=LmxM.01.0370_SLAS_1;Promastigote=40;Intracellular_Amastigote=117;Axenic_Amastigote=99;
LmxM.01	MF_V1	SLAS	89329	89330	.	+	.	ID=LmxM.01.0370_SLAS_2;Promastigote=2;Intracellular_Amastigote=2;Axenic_Amastigote=6;
LmxM.01	MF_V1	SLAS	90474	90475	.	+	.	ID=LmxM.01.0380_SLAS_1;Promastigote=3;Intracellular_Amastigote=7;Axenic_Amastigote=4;
LmxM.01	MF_V1	SLAS	90499	90500	.	+	.	ID=LmxM.01.0380_SLAS_2;Promastigote=9;Intracellular_Amastigote=3;Axenic_Amastigote=10;
LmxM.01	MF_V1	SLAS	93849	93850	.	+	.	ID=LmxM.01.0390_SLAS_1;Promastigote=41;Intracellular_Amastigote=34;Axenic_Amastigote=72;
LmxM.01	MF_V1	SLAS	93853	93854	.	+	.	ID=LmxM.01.0390_SLAS_2;Promastigote=38;Intracellular_Amastigote=11;Axenic_Amastigote=39;
LmxM.01	MF_V1	SLAS	97076	97077	.	+	.	ID=LmxM.01.0400_SLAS_1;Promastigote=12;Intracellular_Amastigote=26;Axenic_Amastigote=22;
LmxM.01	MF_V1	SLAS	99407	99408	.	+	.	ID=LmxM.01.0410_SLAS_1;Promastigote=7;Intracellular_Amastigote=6;Axenic_Amastigote=8;
LmxM.01	MF_V1	SLAS	99460	99461	.	+	.	ID=LmxM.01.0410_SLAS_2;Promastigote=915;Intracellular_Amastigote=650;Axenic_Amastigote=1157;
LmxM.01	MF_V1	SLAS	99481	99482	.	+	.	ID=LmxM.01.0410_SLAS_3;Promastigote=38;Intracellular_Amastigote=101;Axenic_Amastigote=80;
LmxM.01	MF_V1	SLAS	99493	99494	.	+	.	ID=LmxM.01.0410_SLAS_4;Promastigote=9;Intracellular_Amastigote=35;Axenic_Amastigote=10;
LmxM.01	MF_V1	SLAS	100857	100858	.	+	.	ID=LmxM.01.0430_SLAS_1;Promastigote=39;Intracellular_Amastigote=25;Axenic_Amastigote=47;
LmxM.01	MF_V1	SLAS	104035	104036	.	+	.	ID=LmxM.01.0440_SLAS_1;Promastigote=304;Intracellular_Amastigote=165;Axenic_Amastigote=337;
LmxM.01	MF_V1	SLAS	104111	104112	.	+	.	ID=LmxM.01.0440_SLAS_2;Promastigote=50;Intracellular_Amastigote=6;Axenic_Amastigote=19;
LmxM.01	MF_V1	SLAS	107125	107126	.	+	.	ID=LmxM.01_107651_SLAS_1;Promastigote=206;Intracellular_Amastigote=174;Axenic_Amastigote=238;
LmxM.01	MF_V1	SLAS	108731	108732	.	+	.	ID=LmxM.01.0450_SLAS_1;Promastigote=624;Intracellular_Amastigote=144;Axenic_Amastigote=367;
LmxM.01	MF_V1	SLAS	108769	108770	.	+	.	ID=LmxM.01.0450_SLAS_2;Promastigote=46;Intracellular_Amastigote=2;Axenic_Amastigote=43;
LmxM.01	MF_V1	SLAS	108775	108776	.	+	.	ID=LmxM.01.0450_SLAS_3;Promastigote=13;Intracellular_Amastigote=0;Axenic_Amastigote=26;
LmxM.01	MF_V1	SLAS	110886	110887	.	+	.	ID=LmxM.01.0460_SLAS_1;Promastigote=16;Intracellular_Amastigote=4;Axenic_Amastigote=12;
LmxM.01	MF_V1	SLAS	112415	112416	.	+	.	ID=LmxM.01.0460_SLAS_2;Promastigote=3;Intracellular_Amastigote=2;Axenic_Amastigote=8;
LmxM.01	MF_V1	SLAS	120336	120337	.	+	.	ID=LmxM.01.0470_SLAS_1;Promastigote=46;Intracellular_Amastigote=16;Axenic_Amastigote=49;
LmxM.01	MF_V1	SLAS	120345	120346	.	+	.	ID=LmxM.01.0470_SLAS_2;Promastigote=83;Intracellular_Amastigote=51;Axenic_Amastigote=53;
LmxM.01	MF_V1	SLAS	120360	120361	.	+	.	ID=LmxM.01.0470_SLAS_3;Promastigote=99;Intracellular_Amastigote=66;Axenic_Amastigote=84;
LmxM.01	MF_V1	SLAS	120423	120424	.	+	.	ID=LmxM.01.0470_SLAS_4;Promastigote=13;Intracellular_Amastigote=0;Axenic_Amastigote=19;
LmxM.01	MF_V1	SLAS	123142	123143	.	+	.	ID=LmxM.01_123594_SLAS_1;Promastigote=23;Intracellular_Amastigote=30;Axenic_Amastigote=82;
LmxM.01	MF_V1	SLAS	123147	123148	.	+	.	ID=LmxM.01_123594_SLAS_2;Promastigote=1;Intracellular_Amastigote=6;Axenic_Amastigote=8;
LmxM.01	MF_V1	SLAS	124007	124008	.	+	.	ID=LmxM.01.0480_SLAS_1;Promastigote=63;Intracellular_Amastigote=18;Axenic_Amastigote=44;
LmxM.01	MF_V1	SLAS	124030	124031	.	+	.	ID=LmxM.01.0480_SLAS_2;Promastigote=7;Intracellular_Amastigote=5;Axenic_Amastigote=1;
LmxM.01	MF_V1	SLAS	124059	124060	.	+	.	ID=LmxM.01.0480_SLAS_3;Promastigote=24;Intracellular_Amastigote=5;Axenic_Amastigote=14;
LmxM.01	MF_V1	SLAS	126218	126219	.	+	.	ID=LmxM.01.0490_SLAS_1;Promastigote=2;Intracellular_Amastigote=5;Axenic_Amastigote=4;
LmxM.01	MF_V1	SLAS	127352	127353	.	+	.	ID=LmxM.01.0490_SLAS_2;Promastigote=85;Intracellular_Amastigote=17;Axenic_Amastigote=112;
LmxM.01	MF_V1	SLAS	130800	130801	.	+	.	ID=LmxM.01.0500_SLAS_1;Promastigote=23;Intracellular_Amastigote=9;Axenic_Amastigote=31;
LmxM.01	MF_V1	SLAS	135424	135425	.	+	.	ID=LmxM.01.0510_SLAS_1;Promastigote=187;Intracellular_Amastigote=132;Axenic_Amastigote=222;
LmxM.01	MF_V1	SLAS	135560	135561	.	+	.	ID=LmxM.01.0510_SLAS_2;Promastigote=0;Intracellular_Amastigote=7;Axenic_Amastigote=5;
LmxM.01	MF_V1	SLAS	136532	136533	.	+	.	ID=LmxM.01.0520_SLAS_1;Promastigote=1009;Intracellular_Amastigote=115;Axenic_Amastigote=697;
LmxM.01	MF_V1	SLAS	136534	136535	.	+	.	ID=LmxM.01.0520_SLAS_2;Promastigote=141;Intracellular_Amastigote=31;Axenic_Amastigote=108;
LmxM.01	MF_V1	SLAS	136541	136542	.	+	.	ID=LmxM.01.0520_SLAS_3;Promastigote=58;Intracellular_Amastigote=9;Axenic_Amastigote=27;
LmxM.01	MF_V1	SLAS	136592	136593	.	+	.	ID=LmxM.01.0520_SLAS_4;Promastigote=8;Intracellular_Amastigote=2;Axenic_Amastigote=5;
LmxM.01	MF_V1	SLAS	136619	136620	.	+	.	ID=LmxM.01.0520_SLAS_5;Promastigote=19;Intracellular_Amastigote=2;Axenic_Amastigote=3;
LmxM.01	MF_V1	SLAS	136627	136628	.	+	.	ID=LmxM.01.0520_SLAS_6;Promastigote=7;Intracellular_Amastigote=0;Axenic_Amastigote=2;
LmxM.01	MF_V1	SLAS	140303	140304	.	+	.	ID=LmxM.01.0530_SLAS_1;Promastigote=0;Intracellular_Amastigote=11;Axenic_Amastigote=2;
LmxM.01	MF_V1	SLAS	140869	140870	.	+	.	ID=LmxM.01.0530_SLAS_2;Promastigote=92;Intracellular_Amastigote=68;Axenic_Amastigote=218;
LmxM.01	MF_V1	SLAS	140881	140882	.	+	.	ID=LmxM.01.0530_SLAS_3;Promastigote=6;Intracellular_Amastigote=6;Axenic_Amastigote=9;
LmxM.01	MF_V1	SLAS	140889	140890	.	+	.	ID=LmxM.01.0530_SLAS_4;Promastigote=3;Intracellular_Amastigote=1;Axenic_Amastigote=5;
LmxM.01	MF_V1	SLAS	141829	141830	.	+	.	ID=LmxM.01.0530_SLAS_5;Promastigote=118;Intracellular_Amastigote=49;Axenic_Amastigote=159;
LmxM.01	MF_V1	SLAS	147716	147717	.	+	.	ID=LmxM.01.0540_SLAS_1;Promastigote=36;Intracellular_Amastigote=18;Axenic_Amastigote=56;
LmxM.01	MF_V1	SLAS	152602	152603	.	+	.	ID=LmxM.01.0550_SLAS_1;Promastigote=354;Intracellular_Amastigote=287;Axenic_Amastigote=495;
LmxM.01	MF_V1	SLAS	152617	152618	.	+	.	ID=LmxM.01.0550_SLAS_2;Promastigote=5;Intracellular_Amastigote=3;Axenic_Amastigote=7;
LmxM.01	MF_V1	SLAS	154674	154675	.	+	.	ID=LmxM.01.0560_SLAS_1;Promastigote=115;Intracellular_Amastigote=123;Axenic_Amastigote=176;
LmxM.01	MF_V1	SLAS	154679	154680	.	+	.	ID=LmxM.01.0560_SLAS_2;Promastigote=12;Intracellular_Amastigote=5;Axenic_Amastigote=12;
LmxM.01	MF_V1	SLAS	157003	157004	.	+	.	ID=LmxM.01.0570_SLAS_1;Promastigote=123;Intracellular_Amastigote=35;Axenic_Amastigote=147;
LmxM.01	MF_V1	SLAS	157075	157076	.	+	.	ID=LmxM.01.0570_SLAS_2;Promastigote=4;Intracellular_Amastigote=4;Axenic_Amastigote=14;
LmxM.01	MF_V1	SLAS	158612	158613	.	+	.	ID=LmxM.01.0580_SLAS_1;Promastigote=63;Intracellular_Amastigote=32;Axenic_Amastigote=53;
LmxM.01	MF_V1	SLAS	162156	162157	.	+	.	ID=LmxM.01.0590_SLAS_1;Promastigote=7;Intracellular_Amastigote=5;Axenic_Amastigote=11;
LmxM.01	MF_V1	SLAS	162210	162211	.	+	.	ID=LmxM.01.0590_SLAS_2;Promastigote=4;Intracellular_Amastigote=2;Axenic_Amastigote=7;
LmxM.01	MF_V1	SLAS	164438	164439	.	+	.	ID=LmxM.01.0600_SLAS_1;Promastigote=9;Intracellular_Amastigote=5;Axenic_Amastigote=17;
LmxM.01	MF_V1	SLAS	164749	164750	.	+	.	ID=LmxM.01.0600_SLAS_2;Promastigote=1;Intracellular_Amastigote=3;Axenic_Amastigote=6;
LmxM.01	MF_V1	SLAS	170796	170797	.	+	.	ID=LmxM.01.0610_SLAS_1;Promastigote=1;Intracellular_Amastigote=6;Axenic_Amastigote=6;
LmxM.01	MF_V1	SLAS	170830	170831	.	+	.	ID=LmxM.01.0610_SLAS_2;Promastigote=70;Intracellular_Amastigote=17;Axenic_Amastigote=86;
LmxM.01	MF_V1	SLAS	172463	172464	.	+	.	ID=LmxM.01.0620_SLAS_1;Promastigote=1003;Intracellular_Amastigote=181;Axenic_Amastigote=464;
LmxM.01	MF_V1	SLAS	172506	172507	.	+	.	ID=LmxM.01.0620_SLAS_2;Promastigote=22;Intracellular_Amastigote=1;Axenic_Amastigote=9;
LmxM.01	MF_V1	SLAS	175717	175718	.	+	.	ID=LmxM.01.0630_SLAS_1;Promastigote=10;Intracellular_Amastigote=17;Axenic_Amastigote=25;
LmxM.01	MF_V1	SLAS	175720	175721	.	+	.	ID=LmxM.01.0630_SLAS_2;Promastigote=10;Intracellular_Amastigote=6;Axenic_Amastigote=13;
LmxM.01	MF_V1	SLAS	180202	180203	.	+	.	ID=LmxM.01.0640_SLAS_1;Promastigote=131;Intracellular_Amastigote=57;Axenic_Amastigote=146;
LmxM.01	MF_V1	SLAS	184047	184048	.	+	.	ID=LmxM.01.0650_SLAS_1;Promastigote=227;Intracellular_Amastigote=173;Axenic_Amastigote=310;
LmxM.01	MF_V1	SLAS	186609	186610	.	+	.	ID=LmxM.01.0660_SLAS_1;Promastigote=54;Intracellular_Amastigote=18;Axenic_Amastigote=80;
LmxM.01	MF_V1	SLAS	186670	186671	.	+	.	ID=LmxM.01.0660_SLAS_2;Promastigote=20;Intracellular_Amastigote=30;Axenic_Amastigote=34;
LmxM.01	MF_V1	SLAS	192271	192272	.	+	.	ID=LmxM.01.0670_SLAS_1;Promastigote=133;Intracellular_Amastigote=84;Axenic_Amastigote=266;
LmxM.01	MF_V1	SLAS	195085	195086	.	+	.	ID=LmxM.01_195286_SLAS_1;Promastigote=25;Intracellular_Amastigote=15;Axenic_Amastigote=33;
LmxM.01	MF_V1	SLAS	196205	196206	.	+	.	ID=LmxM.01.0680_SLAS_1;Promastigote=52;Intracellular_Amastigote=42;Axenic_Amastigote=67;
LmxM.01	MF_V1	SLAS	196252	196253	.	+	.	ID=LmxM.01.0680_SLAS_2;Promastigote=2;Intracellular_Amastigote=6;Axenic_Amastigote=5;
LmxM.01	MF_V1	SLAS	200714	200715	.	+	.	ID=LmxM.01.0690_SLAS_1;Promastigote=1461;Intracellular_Amastigote=1140;Axenic_Amastigote=2826;
LmxM.01	MF_V1	SLAS	200723	200724	.	+	.	ID=LmxM.01.0690_SLAS_2;Promastigote=114;Intracellular_Amastigote=96;Axenic_Amastigote=343;
LmxM.01	MF_V1	SLAS	200732	200733	.	+	.	ID=LmxM.01.0690_SLAS_3;Promastigote=5;Intracellular_Amastigote=7;Axenic_Amastigote=20;
LmxM.01	MF_V1	SLAS	200804	200805	.	+	.	ID=LmxM.01.0690_SLAS_4;Promastigote=3;Intracellular_Amastigote=15;Axenic_Amastigote=39;
LmxM.01	MF_V1	SLAS	202483	202484	.	+	.	ID=LmxM.01.0700_SLAS_1;Promastigote=2;Intracellular_Amastigote=8;Axenic_Amastigote=22;
LmxM.01	MF_V1	SLAS	203381	203382	.	+	.	ID=LmxM.01.0700_SLAS_2;Promastigote=5;Intracellular_Amastigote=1;Axenic_Amastigote=8;
LmxM.01	MF_V1	SLAS	206443	206444	.	+	.	ID=LmxM.01.0710_SLAS_1;Promastigote=6;Intracellular_Amastigote=9;Axenic_Amastigote=12;
LmxM.01	MF_V1	SLAS	208962	208963	.	+	.	ID=LmxM.01.0720_SLAS_1;Promastigote=92;Intracellular_Amastigote=42;Axenic_Amastigote=133;
LmxM.01	MF_V1	SLAS	208977	208978	.	+	.	ID=LmxM.01.0720_SLAS_2;Promastigote=19;Intracellular_Amastigote=6;Axenic_Amastigote=64;
LmxM.01	MF_V1	SLAS	214488	214489	.	+	.	ID=LmxM.01.0730_SLAS_1;Promastigote=14;Intracellular_Amastigote=17;Axenic_Amastigote=33;
LmxM.01	MF_V1	SLAS	214497	214498	.	+	.	ID=LmxM.01.0730_SLAS_2;Promastigote=23;Intracellular_Amastigote=21;Axenic_Amastigote=54;
LmxM.01	MF_V1	SLAS	214512	214513	.	+	.	ID=LmxM.01.0730_SLAS_3;Promastigote=10;Intracellular_Amastigote=1;Axenic_Amastigote=26;
LmxM.01	MF_V1	SLAS	222129	222130	.	+	.	ID=LmxM.01.0740_SLAS_1;Promastigote=17;Intracellular_Amastigote=12;Axenic_Amastigote=33;
LmxM.01	MF_V1	SLAS	222159	222160	.	+	.	ID=LmxM.01.0740_SLAS_2;Promastigote=5;Intracellular_Amastigote=4;Axenic_Amastigote=13;
LmxM.01	MF_V1	SLAS	225484	225485	.	+	.	ID=LmxM.01.0750_SLAS_1;Promastigote=303;Intracellular_Amastigote=54;Axenic_Amastigote=214;
LmxM.01	MF_V1	SLAS	225489	225490	.	+	.	ID=LmxM.01.0750_SLAS_2;Promastigote=59;Intracellular_Amastigote=20;Axenic_Amastigote=75;
LmxM.01	MF_V1	SLAS	225522	225523	.	+	.	ID=LmxM.01.0750_SLAS_3;Promastigote=19;Intracellular_Amastigote=11;Axenic_Amastigote=27;
LmxM.01	MF_V1	SLAS	230439	230440	.	+	.	ID=LmxM.01.0760_SLAS_1;Promastigote=5;Intracellular_Amastigote=5;Axenic_Amastigote=4;
LmxM.01	MF_V1	SLAS	231942	231943	.	+	.	ID=LmxM.01_232406_SLAS_1;Promastigote=4221;Intracellular_Amastigote=2383;Axenic_Amastigote=4126;
LmxM.01	MF_V1	SLAS	231962	231963	.	+	.	ID=LmxM.01_232406_SLAS_2;Promastigote=76;Intracellular_Amastigote=61;Axenic_Amastigote=125;
LmxM.01	MF_V1	SLAS	232994	232995	.	+	.	ID=LmxM.01.0770_SLAS_1;Promastigote=4177;Intracellular_Amastigote=2467;Axenic_Amastigote=4121;
LmxM.01	MF_V1	SLAS	233014	233015	.	+	.	ID=LmxM.01.0770_SLAS_2;Promastigote=76;Intracellular_Amastigote=40;Axenic_Amastigote=105;
LmxM.01	MF_V1	SLAS	233138	233139	.	+	.	ID=LmxM.01.0770_SLAS_3;Promastigote=4;Intracellular_Amastigote=9;Axenic_Amastigote=16;
LmxM.01	MF_V1	SLAS	234567	234568	.	+	.	ID=LmxM.01.0790_SLAS_1;Promastigote=9;Intracellular_Amastigote=13;Axenic_Amastigote=9;
LmxM.01	MF_V1	SLAS	237335	237336	.	+	.	ID=LmxM.01.0790_SLAS_2;Promastigote=86;Intracellular_Amastigote=105;Axenic_Amastigote=78;
LmxM.01	MF_V1	SLAS	237366	237367	.	+	.	ID=LmxM.01.0790_SLAS_3;Promastigote=3;Intracellular_Amastigote=4;Axenic_Amastigote=5;
LmxM.01	MF_V1	SLAS	237404	237405	.	+	.	ID=LmxM.01.0790_SLAS_4;Promastigote=1;Intracellular_Amastigote=5;Axenic_Amastigote=6;
LmxM.01	MF_V1	SLAS	239855	239856	.	+	.	ID=LmxM.01_240110_SLAS_1;Promastigote=655;Intracellular_Amastigote=227;Axenic_Amastigote=716;
LmxM.01	MF_V1	SLAS	239860	239861	.	+	.	ID=LmxM.01_240110_SLAS_2;Promastigote=178;Intracellular_Amastigote=63;Axenic_Amastigote=269;
LmxM.01	MF_V1	SLAS	239866	239867	.	+	.	ID=LmxM.01_240110_SLAS_3;Promastigote=25;Intracellular_Amastigote=9;Axenic_Amastigote=48;
LmxM.01	MF_V1	SLAS	240672	240673	.	+	.	ID=LmxM.01.0800_SLAS_1;Promastigote=29;Intracellular_Amastigote=39;Axenic_Amastigote=43;
LmxM.01	MF_V1	SLAS	240751	240752	.	+	.	ID=LmxM.01.0800_SLAS_2;Promastigote=3;Intracellular_Amastigote=8;Axenic_Amastigote=12;
LmxM.01	MF_V1	SLAS	242509	242510	.	+	.	ID=LmxM.01.0810_SLAS_1;Promastigote=15;Intracellular_Amastigote=21;Axenic_Amastigote=41;
LmxM.01	MF_V1	SLAS	242515	242516	.	+	.	ID=LmxM.01.0810_SLAS_2;Promastigote=12;Intracellular_Amastigote=7;Axenic_Amastigote=18;
LmxM.01	MF_V1	SLAS	242524	242525	.	+	.	ID=LmxM.01.0810_SLAS_3;Promastigote=2;Intracellular_Amastigote=4;Axenic_Amastigote=6;
LmxM.01	MF_V1	SLAS	242541	242542	.	+	.	ID=LmxM.01.0810_SLAS_4;Promastigote=18;Intracellular_Amastigote=21;Axenic_Amastigote=41;
LmxM.01	MF_V1	SLAS	242553	242554	.	+	.	ID=LmxM.01.0810_SLAS_5;Promastigote=4;Intracellular_Amastigote=4;Axenic_Amastigote=8;
LmxM.01	MF_V1	SLAS	247538	247539	.	+	.	ID=LmxM.01.0820_SLAS_1;Promastigote=6;Intracellular_Amastigote=5;Axenic_Amastigote=12;
LmxM.02	MF_V1	SLAS	780	781	.	-	.	ID=LmxM.02.0030_SLAS_2;Promastigote=5;Intracellular_Amastigote=16;Axenic_Amastigote=37;
LmxM.02	MF_V1	SLAS	783	784	.	-	.	ID=LmxM.02.0030_SLAS_1;Promastigote=3;Intracellular_Amastigote=13;Axenic_Amastigote=11;
LmxM.02	MF_V1	SLAS	3708	3709	.	-	.	ID=LmxM.02.0040_SLAS_6;Promastigote=51;Intracellular_Amastigote=7;Axenic_Amastigote=57;
LmxM.02	MF_V1	SLAS	3714	3715	.	-	.	ID=LmxM.02.0040_SLAS_5;Promastigote=97;Intracellular_Amastigote=23;Axenic_Amastigote=71;
LmxM.02	MF_V1	SLAS	3721	3722	.	-	.	ID=LmxM.02.0040_SLAS_4;Promastigote=801;Intracellular_Amastigote=80;Axenic_Amastigote=449;
LmxM.02	MF_V1	SLAS	3723	3724	.	-	.	ID=LmxM.02.0040_SLAS_3;Promastigote=91;Intracellular_Amastigote=6;Axenic_Amastigote=49;
LmxM.02	MF_V1	SLAS	3727	3728	.	-	.	ID=LmxM.02.0040_SLAS_2;Promastigote=16;Intracellular_Amastigote=3;Axenic_Amastigote=8;
LmxM.02	MF_V1	SLAS	4445	4446	.	-	.	ID=LmxM.02.0040_SLAS_1;Promastigote=2;Intracellular_Amastigote=3;Axenic_Amastigote=6;
LmxM.02	MF_V1	SLAS	8024	8025	.	-	.	ID=LmxM.02.0050_SLAS_1;Promastigote=37;Intracellular_Amastigote=11;Axenic_Amastigote=69;
LmxM.02	MF_V1	SLAS	9126	9127	.	-	.	ID=LmxM.02.0060_SLAS_2;Promastigote=0;Intracellular_Amastigote=3;Axenic_Amastigote=7;
LmxM.02	MF_V1	SLAS	9134	9135	.	-	.	ID=LmxM.02.0060_SLAS_1;Promastigote=55;Intracellular_Amastigote=284;Axenic_Amastigote=123;
LmxM.02	MF_V1	SLAS	10865	10866	.	-	.	ID=LmxM.02.0070_SLAS_1;Promastigote=4;Intracellular_Amastigote=10;Axenic_Amastigote=14;
LmxM.02	MF_V1	SLAS	12317	12318	.	-	.	ID=LmxM.02_11936_SLAS_3;Promastigote=1;Intracellular_Amastigote=5;Axenic_Amastigote=3;
LmxM.02	MF_V1	SLAS	12322	12323	.	-	.	ID=LmxM.02_11936_SLAS_2;Promastigote=5;Intracellular_Amastigote=9;Axenic_Amastigote=10;
LmxM.02	MF_V1	SLAS	12365	12366	.	-	.	ID=LmxM.02_11936_SLAS_1;Promastigote=26;Intracellular_Amastigote=19;Axenic_Amastigote=29;
LmxM.02	MF_V1	SLAS	18591	18592	.	-	.	ID=LmxM.02.0085_SLAS_5;Promastigote=2;Intracellular_Amastigote=1;Axenic_Amastigote=8;
LmxM.02	MF_V1	SLAS	18607	18608	.	-	.	ID=LmxM.02.0085_SLAS_4;Promastigote=37;Intracellular_Amastigote=28;Axenic_Amastigote=69;
LmxM.02	MF_V1	SLAS	18629	18630	.	-	.	ID=LmxM.02.0085_SLAS_3;Promastigote=7;Intracellular_Amastigote=4;Axenic_Amastigote=13;
LmxM.02	MF_V1	SLAS	18642	18643	.	-	.	ID=LmxM.02.0085_SLAS_2;Promastigote=2;Intracellular_Amastigote=5;Axenic_Amastigote=5;
LmxM.02	MF_V1	SLAS	18792	18793	.	-	.	ID=LmxM.02.0085_SLAS_1;Promastigote=32;Intracellular_Amastigote=72;Axenic_Amastigote=68;
LmxM.02	MF_V1	SLAS	20846	20847	.	-	.	ID=LmxM.02.0090_SLAS_2;Promastigote=1;Intracellular_Amastigote=6;Axenic_Amastigote=4;
LmxM.02	MF_V1	SLAS	20858	20859	.	-	.	ID=LmxM.02.0090_SLAS_1;Promastigote=28;Intracellular_Amastigote=21;Axenic_Amastigote=39;
LmxM.02	MF_V1	SLAS	23763	23764	.	-	.	ID=LmxM.02.0100_SLAS_2;Promastigote=3;Intracellular_Amastigote=2;Axenic_Amastigote=6;
LmxM.02	MF_V1	SLAS	23796	23797	.	-	.	ID=LmxM.02.0100_SLAS_1;Promastigote=69;Intracellular_Amastigote=67;Axenic_Amastigote=120;
LmxM.02	MF_V1	SLAS	29506	29507	.	-	.	ID=LmxM.02.0110_SLAS_2;Promastigote=6;Intracellular_Amastigote=4;Axenic_Amastigote=8;
LmxM.02	MF_V1	SLAS	29514	29515	.	-	.	ID=LmxM.02.0110_SLAS_1;Promastigote=23;Intracellular_Amastigote=2;Axenic_Amastigote=16;
LmxM.02	MF_V1	SLAS	45562	45563	.	-	.	ID=LmxM.02.0120_SLAS_3;Promastigote=2;Intracellular_Amastigote=0;Axenic_Amastigote=8;
LmxM.02	MF_V1	SLAS	45574	45575	.	-	.	ID=LmxM.02.0120_SLAS_2;Promastigote=78;Intracellular_Amastigote=10;Axenic_Amastigote=86;
LmxM.02	MF_V1	SLAS	45578	45579	.	-	.	ID=LmxM.02.0120_SLAS_1;Promastigote=142;Intracellular_Amastigote=9;Axenic_Amastigote=141;
LmxM.02	MF_V1	SLAS	47116	47117	.	-	.	ID=LmxM.02.0130_SLAS_2;Promastigote=16;Intracellular_Amastigote=3;Axenic_Amastigote=22;
LmxM.02	MF_V1	SLAS	47125	47126	.	-	.	ID=LmxM.02.0130_SLAS_1;Promastigote=392;Intracellular_Amastigote=230;Axenic_Amastigote=498;
LmxM.02	MF_V1	SLAS	51210	51211	.	-	.	ID=LmxM.02.0140_SLAS_2;Promastigote=65;Intracellular_Amastigote=30;Axenic_Amastigote=132;
LmxM.02	MF_V1	SLAS	51323	51324	.	-	.	ID=LmxM.02.0140_SLAS_1;Promastigote=39;Intracellular_Amastigote=7;Axenic_Amastigote=45;
LmxM.02	MF_V1	SLAS	58445	58446	.	-	.	ID=LmxM.02.0150_SLAS_1;Promastigote=68;Intracellular_Amastigote=15;Axenic_Amastigote=116;
LmxM.02	MF_V1	SLAS	70474	70475	.	-	.	ID=LmxM.02.0160_SLAS_3;Promastigote=7;Intracellular_Amastigote=1;Axenic_Amastigote=5;
LmxM.02	MF_V1	SLAS	70476	70477	.	-	.	ID=LmxM.02.0160_SLAS_2;Promastigote=10;Intracellular_Amastigote=3;Axenic_Amastigote=17;
LmxM.02	MF_V1	SLAS	70535	70536	.	-	.	ID=LmxM.02.0160_SLAS_1;Promastigote=7;Intracellular_Amastigote=2;Axenic_Amastigote=9;
LmxM.02	MF_V1	SLAS	74472	74473	.	-	.	ID=LmxM.02.0170_SLAS_1;Promastigote=229;Intracellular_Amastigote=49;Axenic_Amastigote=251;
LmxM.02	MF_V1	SLAS	81441	81442	.	-	.	ID=LmxM.02.0200_SLAS_5;Promastigote=120;Intracellular_Amastigote=39;Axenic_Amastigote=86;
LmxM.02	MF_V1	SLAS	81476	81477	.	-	.	ID=LmxM.02.0200_SLAS_4;Promastigote=13;Intracellular_Amastigote=2;Axenic_Amastigote=5;
LmxM.02	MF_V1	SLAS	82653	82654	.	-	.	ID=LmxM.02.0200_SLAS_3;Promastigote=12;Intracellular_Amastigote=5;Axenic_Amastigote=15;
LmxM.02	MF_V1	SLAS	82676	82677	.	-	.	ID=LmxM.02.0200_SLAS_2;Promastigote=4;Intracellular_Amastigote=1;Axenic_Amastigote=6;
LmxM.02	MF_V1	SLAS	82917	82918	.	-	.	ID=LmxM.02.0200_SLAS_1;Promastigote=38;Intracellular_Amastigote=25;Axenic_Amastigote=32;
LmxM.02	MF_V1	SLAS	84665	84666	.	-	.	ID=LmxM.02_84177_SLAS_2;Promastigote=10;Intracellular_Amastigote=6;Axenic_Amastigote=40;
LmxM.02	MF_V1	SLAS	84698	84699	.	-	.	ID=LmxM.02_84177_SLAS_1;Promastigote=70;Intracellular_Amastigote=81;Axenic_Amastigote=223;
LmxM.02	MF_V1	SLAS	88938	88939	.	-	.	ID=LmxM.02.0230_SLAS_4;Promastigote=90;Intracellular_Amastigote=14;Axenic_Amastigote=56;
LmxM.02	MF_V1	SLAS	89978	89979	.	-	.	ID=LmxM.02.0230_SLAS_3;Promastigote=9;Intracellular_Amastigote=1;Axenic_Amastigote=22;
LmxM.02	MF_V1	SLAS	89987	89988	.	-	.	ID=LmxM.02.0230_SLAS_2;Promastigote=9;Intracellular_Amastigote=13;Axenic_Amastigote=23;
LmxM.02	MF_V1	SLAS	90003	90004	.	-	.	ID=LmxM.02.0230_SLAS_1;Promastigote=207;Intracellular_Amastigote=95;Axenic_Amastigote=263;
LmxM.02	MF_V1	SLAS	94242	94243	.	-	.	ID=LmxM.02.0240_SLAS_1;Promastigote=3;Intracellular_Amastigote=3;Axenic_Amastigote=13;
LmxM.02	MF_V1	SLAS	99099	99100	.	-	.	ID=LmxM.02.0250_SLAS_2;Promastigote=1;Intracellular_Amastigote=2;Axenic_Amastigote=12;
LmxM.02	MF_V1	SLAS	99330	99331	.	-	.	ID=LmxM.02.0250_SLAS_1;Promastigote=64;Intracellular_Amastigote=72;Axenic_Amastigote=100;
LmxM.02	MF_V1	SLAS	101037	101038	.	-	.	ID=LmxM.02.0260_SLAS_6;Promastigote=4;Intracellular_Amastigote=3;Axenic_Amastigote=26;
LmxM.02	MF_V1	SLAS	101207	101208	.	-	.	ID=LmxM.02.0260_SLAS_5;Promastigote=7;Intracellular_Amastigote=9;Axenic_Amastigote=24;
LmxM.02	MF_V1	SLAS	101215	101216	.	-	.	ID=LmxM.02.0260_SLAS_4;Promastigote=10;Intracellular_Amastigote=8;Axenic_Amastigote=14;
LmxM.02	MF_V1	SLAS	101271	101272	.	-	.	ID=LmxM.02.0260_SLAS_3;Promastigote=49;Intracellular_Amastigote=16;Axenic_Amastigote=54;
LmxM.02	MF_V1	SLAS	101293	101294	.	-	.	ID=LmxM.02.0260_SLAS_2;Promastigote=53;Intracellular_Amastigote=37;Axenic_Amastigote=50;
LmxM.02	MF_V1	SLAS	101329	101330	.	-	.	ID=LmxM.02.0260_SLAS_1;Promastigote=69;Intracellular_Amastigote=78;Axenic_Amastigote=65;
LmxM.02	MF_V1	SLAS	102765	102766	.	-	.	ID=LmxM.02.0270_SLAS_1;Promastigote=43;Intracellular_Amastigote=21;Axenic_Amastigote=62;
LmxM.02	MF_V1	SLAS	104526	104527	.	-	.	ID=LmxM.02.0280_SLAS_1;Promastigote=4;Intracellular_Amastigote=10;Axenic_Amastigote=8;
LmxM.02	MF_V1	SLAS	107334	107335	.	-	.	ID=LmxM.02.0290_SLAS_1;Promastigote=20;Intracellular_Amastigote=10;Axenic_Amastigote=14;
LmxM.02	MF_V1	SLAS	120695	120696	.	-	.	ID=LmxM.02.0300_SLAS_1;Promastigote=144;Intracellular_Amastigote=23;Axenic_Amastigote=212;
LmxM.02	MF_V1	SLAS	123859	123860	.	-	.	ID=LmxM.02.0310_SLAS_1;Promastigote=26;Intracellular_Amastigote=2;Axenic_Amastigote=9;
LmxM.02	MF_V1	SLAS	125686	125687	.	-	.	ID=LmxM.02.0320_SLAS_1;Promastigote=9;Intracellular_Amastigote=13;Axenic_Amastigote=25;
LmxM.02	MF_V1	SLAS	129852	129853	.	-	.	ID=LmxM.02.0330_SLAS_2;Promastigote=11;Intracellular_Amastigote=0;Axenic_Amastigote=11;
LmxM.02	MF_V1	SLAS	130021	130022	.	-	.	ID=LmxM.02.0330_SLAS_1;Promastigote=4;Intracellular_Amastigote=0;Axenic_Amastigote=5;
LmxM.02	MF_V1	SLAS	138144	138145	.	-	.	ID=LmxM.02.0350_SLAS_1;Promastigote=19;Intracellular_Amastigote=13;Axenic_Amastigote=27;
LmxM.02	MF_V1	SLAS	141120	141121	.	-	.	ID=LmxM.02.0360_SLAS_2;Promastigote=8;Intracellular_Amastigote=3;Axenic_Amastigote=19;
LmxM.02	MF_V1	SLAS	141184	141185	.	-	.	ID=LmxM.02.0360_SLAS_1;Promastigote=45;Intracellular_Amastigote=42;Axenic_Amastigote=78;
LmxM.02	MF_V1	SLAS	144592	144593	.	-	.	ID=LmxM.02.0370_SLAS_2;Promastigote=8;Intracellular_Amastigote=0;Axenic_Amastigote=16;
LmxM.02	MF_V1	SLAS	144736	144737	.	-	.	ID=LmxM.02.0370_SLAS_1;Promastigote=16;Intracellular_Amastigote=5;Axenic_Amastigote=13;
LmxM.02	MF_V1	SLAS	146761	146762	.	-	.	ID=LmxM.02.0380_SLAS_2;Promastigote=11;Intracellular_Amastigote=3;Axenic_Amastigote=17;
LmxM.02	MF_V1	SLAS	146766	146767	.	-	.	ID=LmxM.02.0380_SLAS_1;Promastigote=79;Intracellular_Amastigote=21;Axenic_Amastigote=104;
LmxM.02	MF_V1	SLAS	148745	148746	.	-	.	ID=LmxM.02.0390_SLAS_1;Promastigote=10;Intracellular_Amastigote=8;Axenic_Amastigote=21;
LmxM.02	MF_V1	SLAS	148819	148820	.	-	.	ID=LmxM.02.0400_SLAS_3;Promastigote=5;Intracellular_Amastigote=1;Axenic_Amastigote=4;
LmxM.02	MF_V1	SLAS	148844	148845	.	-	.	ID=LmxM.02.0400_SLAS_2;Promastigote=5;Intracellular_Amastigote=1;Axenic_Amastigote=4;
LmxM.02	MF_V1	SLAS	148868	148869	.	-	.	ID=LmxM.02.0400_SLAS_1;Promastigote=141;Intracellular_Amastigote=29;Axenic_Amastigote=169;
LmxM.02	MF_V1	SLAS	158925	158926	.	-	.	ID=LmxM.02.0420_SLAS_2;Promastigote=12;Intracellular_Amastigote=5;Axenic_Amastigote=14;
LmxM.02	MF_V1	SLAS	159048	159049	.	-	.	ID=LmxM.02.0420_SLAS_1;Promastigote=40;Intracellular_Amastigote=41;Axenic_Amastigote=86;
LmxM.02	MF_V1	SLAS	160135	160136	.	-	.	ID=LmxM.02_159692_SLAS_2;Promastigote=4;Intracellular_Amastigote=37;Axenic_Amastigote=14;
LmxM.02	MF_V1	SLAS	160235	160236	.	-	.	ID=LmxM.02_159692_SLAS_1;Promastigote=73;Intracellular_Amastigote=637;Axenic_Amastigote=235;
LmxM.02	MF_V1	SLAS	161699	161700	.	-	.	ID=LmxM.02.0430_SLAS_1;Promastigote=53;Intracellular_Amastigote=43;Axenic_Amastigote=127;
LmxM.02	MF_V1	SLAS	165801	165802	.	-	.	ID=LmxM.02.0440_SLAS_1;Promastigote=13;Intracellular_Amastigote=18;Axenic_Amastigote=24;
LmxM.02	MF_V1	SLAS	167617	167618	.	-	.	ID=LmxM.02.0450_SLAS_14;Promastigote=9;Intracellular_Amastigote=11;Axenic_Amastigote=12;
LmxM.02	MF_V1	SLAS	167766	167767	.	-	.	ID=LmxM.02.0450_SLAS_13;Promastigote=41;Intracellular_Amastigote=4;Axenic_Amastigote=15;
LmxM.02	MF_V1	SLAS	167813	167814	.	-	.	ID=LmxM.02.0450_SLAS_12;Promastigote=97;Intracellular_Amastigote=3;Axenic_Amastigote=58;
LmxM.02	MF_V1	SLAS	167817	167818	.	-	.	ID=LmxM.02.0450_SLAS_11;Promastigote=41;Intracellular_Amastigote=7;Axenic_Amastigote=23;
LmxM.02	MF_V1	SLAS	167994	167995	.	-	.	ID=LmxM.02.0450_SLAS_10;Promastigote=41;Intracellular_Amastigote=4;Axenic_Amastigote=50;
LmxM.02	MF_V1	SLAS	168028	168029	.	-	.	ID=LmxM.02.0450_SLAS_9;Promastigote=18;Intracellular_Amastigote=10;Axenic_Amastigote=12;
LmxM.02	MF_V1	SLAS	168474	168475	.	-	.	ID=LmxM.02.0450_SLAS_8;Promastigote=0;Intracellular_Amastigote=2;Axenic_Amastigote=9;
LmxM.02	MF_V1	SLAS	168481	168482	.	-	.	ID=LmxM.02.0450_SLAS_7;Promastigote=34;Intracellular_Amastigote=61;Axenic_Amastigote=148;
LmxM.02	MF_V1	SLAS	168507	168508	.	-	.	ID=LmxM.02.0450_SLAS_6;Promastigote=46;Intracellular_Amastigote=186;Axenic_Amastigote=139;
LmxM.02	MF_V1	SLAS	169973	169974	.	-	.	ID=LmxM.02.0450_SLAS_5;Promastigote=5;Intracellular_Amastigote=12;Axenic_Amastigote=7;
LmxM.02	MF_V1	SLAS	169982	169983	.	-	.	ID=LmxM.02.0450_SLAS_4;Promastigote=3;Intracellular_Amastigote=3;Axenic_Amastigote=14;
LmxM.02	MF_V1	SLAS	170278	170279	.	-	.	ID=LmxM.02.0450_SLAS_3;Promastigote=6;Intracellular_Amastigote=3;Axenic_Amastigote=4;
LmxM.02	MF_V1	SLAS	170294	170295	.	-	.	ID=LmxM.02.0450_SLAS_2;Promastigote=16;Intracellular_Amastigote=18;Axenic_Amastigote=12;
LmxM.02	MF_V1	SLAS	170299	170300	.	-	.	ID=LmxM.02.0450_SLAS_1;Promastigote=21;Intracellular_Amastigote=26;Axenic_Amastigote=7;
LmxM.02	MF_V1	SLAS	172477	172478	.	-	.	ID=LmxM.02.0460_SLAS_2;Promastigote=2;Intracellular_Amastigote=1;Axenic_Amastigote=17;
LmxM.02	MF_V1	SLAS	172647	172648	.	-	.	ID=LmxM.02.0460_SLAS_1;Promastigote=22;Intracellular_Amastigote=12;Axenic_Amastigote=34;
LmxM.02	MF_V1	SLAS	184019	184020	.	-	.	ID=LmxM.02.0470_SLAS_2;Promastigote=6;Intracellular_Amastigote=4;Axenic_Amastigote=10;
LmxM.02	MF_V1	SLAS	184116	184117	.	-	.	ID=LmxM.02.0470_SLAS_1;Promastigote=130;Intracellular_Amastigote=55;Axenic_Amastigote=231;
LmxM.02	MF_V1	SLAS	185737	185738	.	-	.	ID=LmxM.02.0480_SLAS_2;Promastigote=21;Intracellular_Amastigote=31;Axenic_Amastigote=37;
LmxM.02	MF_V1	SLAS	185873	185874	.	-	.	ID=LmxM.02.0480_SLAS_1;Promastigote=9;Intracellular_Amastigote=3;Axenic_Amastigote=8;
LmxM.02	MF_V1	SLAS	190021	190022	.	-	.	ID=LmxM.02.0490_SLAS_1;Promastigote=16;Intracellular_Amastigote=14;Axenic_Amastigote=21;
LmxM.02	MF_V1	SLAS	193282	193283	.	-	.	ID=LmxM.02.0500_SLAS_1;Promastigote=18;Intracellular_Amastigote=20;Axenic_Amastigote=36;
LmxM.02	MF_V1	SLAS	195118	195119	.	-	.	ID=LmxM.02.0510_SLAS_5;Promastigote=24;Intracellular_Amastigote=36;Axenic_Amastigote=26;
LmxM.02	MF_V1	SLAS	195125	195126	.	-	.	ID=LmxM.02.0510_SLAS_4;Promastigote=20;Intracellular_Amastigote=22;Axenic_Amastigote=17;
LmxM.02	MF_V1	SLAS	195261	195262	.	-	.	ID=LmxM.02.0510_SLAS_3;Promastigote=11;Intracellular_Amastigote=6;Axenic_Amastigote=15;
LmxM.02	MF_V1	SLAS	195297	195298	.	-	.	ID=LmxM.02.0510_SLAS_2;Promastigote=15;Intracellular_Amastigote=11;Axenic_Amastigote=30;
LmxM.02	MF_V1	SLAS	195345	195346	.	-	.	ID=LmxM.02.0510_SLAS_1;Promastigote=14;Intracellular_Amastigote=0;Axenic_Amastigote=5;
LmxM.02	MF_V1	SLAS	208830	208831	.	-	.	ID=LmxM.02.0520_SLAS_2;Promastigote=49;Intracellular_Amastigote=92;Axenic_Amastigote=110;
LmxM.02	MF_V1	SLAS	208877	208878	.	-	.	ID=LmxM.02.0520_SLAS_1;Promastigote=8;Intracellular_Amastigote=9;Axenic_Amastigote=34;
LmxM.02	MF_V1	SLAS	214260	214261	.	-	.	ID=LmxM.02.0530_SLAS_3;Promastigote=19;Intracellular_Amastigote=8;Axenic_Amastigote=16;
LmxM.02	MF_V1	SLAS	214283	214284	.	-	.	ID=LmxM.02.0530_SLAS_2;Promastigote=5;Intracellular_Amastigote=1;Axenic_Amastigote=7;
LmxM.02	MF_V1	SLAS	214851	214852	.	-	.	ID=LmxM.02.0530_SLAS_1;Promastigote=2;Intracellular_Amastigote=13;Axenic_Amastigote=5;
LmxM.02	MF_V1	SLAS	217110	217111	.	-	.	ID=LmxM.02.0540_SLAS_2;Promastigote=9;Intracellular_Amastigote=4;Axenic_Amastigote=8;
LmxM.02	MF_V1	SLAS	217115	217116	.	-	.	ID=LmxM.02.0540_SLAS_1;Promastigote=264;Intracellular_Amastigote=321;Axenic_Amastigote=356;
LmxM.02	MF_V1	SLAS	219448	219449	.	-	.	ID=LmxM.02.0550_SLAS_2;Promastigote=6;Intracellular_Amastigote=2;Axenic_Amastigote=2;
LmxM.02	MF_V1	SLAS	219470	219471	.	-	.	ID=LmxM.02.0550_SLAS_1;Promastigote=495;Intracellular_Amastigote=49;Axenic_Amastigote=140;
LmxM.02	MF_V1	SLAS	222987	222988	.	-	.	ID=LmxM.02.0560_SLAS_3;Promastigote=5;Intracellular_Amastigote=1;Axenic_Amastigote=3;
LmxM.02	MF_V1	SLAS	223117	223118	.	-	.	ID=LmxM.02.0560_SLAS_2;Promastigote=5;Intracellular_Amastigote=0;Axenic_Amastigote=4;
LmxM.02	MF_V1	SLAS	223283	223284	.	-	.	ID=LmxM.02.0560_SLAS_1;Promastigote=2;Intracellular_Amastigote=3;Axenic_Amastigote=4;
LmxM.02	MF_V1	SLAS	255571	255572	.	+	.	ID=LmxM.02.0600_SLAS_1;Promastigote=31;Intracellular_Amastigote=21;Axenic_Amastigote=33;
LmxM.02	MF_V1	SLAS	255621	255622	.	+	.	ID=LmxM.02.0600_SLAS_2;Promastigote=2;Intracellular_Amastigote=3;Axenic_Amastigote=5;
LmxM.02	MF_V1	SLAS	257580	257581	.	+	.	ID=LmxM.02.0610_SLAS_1;Promastigote=63;Intracellular_Amastigote=36;Axenic_Amastigote=126;
LmxM.02	MF_V1	SLAS	257660	257661	.	+	.	ID=LmxM.02.0610_SLAS_2;Promastigote=7;Intracellular_Amastigote=5;Axenic_Amastigote=7;
LmxM.02	MF_V1	SLAS	259696	259697	.	+	.	ID=LmxM.02.0620_SLAS_1;Promastigote=8;Intracellular_Amastigote=5;Axenic_Amastigote=2;
LmxM.02	MF_V1	SLAS	259745	259746	.	+	.	ID=LmxM.02.0620_SLAS_2;Promastigote=27;Intracellular_Amastigote=9;Axenic_Amastigote=64;
LmxM.02	MF_V1	SLAS	259748	259749	.	+	.	ID=LmxM.02.0620_SLAS_3;Promastigote=24;Intracellular_Amastigote=3;Axenic_Amastigote=28;
LmxM.02	MF_V1	SLAS	259750	259751	.	+	.	ID=LmxM.02.0620_SLAS_4;Promastigote=4;Intracellular_Amastigote=0;Axenic_Amastigote=10;
LmxM.02	MF_V1	SLAS	262264	262265	.	+	.	ID=LmxM.02.0630_SLAS_1;Promastigote=10;Intracellular_Amastigote=14;Axenic_Amastigote=41;
LmxM.02	MF_V1	SLAS	265584	265585	.	+	.	ID=LmxM.02.0640_SLAS_1;Promastigote=8;Intracellular_Amastigote=8;Axenic_Amastigote=13;
LmxM.02	MF_V1	SLAS	270238	270239	.	+	.	ID=LmxM.02.0650_SLAS_1;Promastigote=146;Intracellular_Amastigote=79;Axenic_Amastigote=159;
LmxM.02	MF_V1	SLAS	270243	270244	.	+	.	ID=LmxM.02.0650_SLAS_2;Promastigote=44;Intracellular_Amastigote=25;Axenic_Amastigote=61;
LmxM.02	MF_V1	SLAS	271987	271988	.	+	.	ID=LmxM.02.0660_SLAS_1;Promastigote=55;Intracellular_Amastigote=32;Axenic_Amastigote=68;
LmxM.02	MF_V1	SLAS	275609	275610	.	+	.	ID=LmxM.02.0670_SLAS_1;Promastigote=528;Intracellular_Amastigote=146;Axenic_Amastigote=608;
LmxM.02	MF_V1	SLAS	275634	275635	.	+	.	ID=LmxM.02.0670_SLAS_2;Promastigote=6;Intracellular_Amastigote=3;Axenic_Amastigote=8;
LmxM.02	MF_V1	SLAS	277281	277282	.	+	.	ID=LmxM.02.0680_SLAS_1;Promastigote=24;Intracellular_Amastigote=18;Axenic_Amastigote=28;
LmxM.02	MF_V1	SLAS	277609	277610	.	+	.	ID=LmxM.02.0680_SLAS_2;Promastigote=22;Intracellular_Amastigote=56;Axenic_Amastigote=63;
LmxM.02	MF_V1	SLAS	277613	277614	.	+	.	ID=LmxM.02.0680_SLAS_3;Promastigote=7;Intracellular_Amastigote=6;Axenic_Amastigote=13;
LmxM.02	MF_V1	SLAS	279742	279743	.	+	.	ID=LmxM.02.0690_SLAS_1;Promastigote=199;Intracellular_Amastigote=100;Axenic_Amastigote=287;
LmxM.02	MF_V1	SLAS	281947	281948	.	+	.	ID=LmxM.02.0700_SLAS_1;Promastigote=58;Intracellular_Amastigote=41;Axenic_Amastigote=86;
LmxM.02	MF_V1	SLAS	281967	281968	.	+	.	ID=LmxM.02.0700_SLAS_2;Promastigote=128;Intracellular_Amastigote=65;Axenic_Amastigote=156;
LmxM.02	MF_V1	SLAS	282044	282045	.	+	.	ID=LmxM.02.0700_SLAS_3;Promastigote=1;Intracellular_Amastigote=2;Axenic_Amastigote=7;
LmxM.02	MF_V1	SLAS	286145	286146	.	+	.	ID=LmxM.02.0710_SLAS_1;Promastigote=252;Intracellular_Amastigote=95;Axenic_Amastigote=272;
LmxM.02	MF_V1	SLAS	286156	286157	.	+	.	ID=LmxM.02.0710_SLAS_2;Promastigote=38;Intracellular_Amastigote=6;Axenic_Amastigote=60;
LmxM.02	MF_V1	SLAS	286221	286222	.	+	.	ID=LmxM.02.0710_SLAS_3;Promastigote=8;Intracellular_Amastigote=5;Axenic_Amastigote=12;
LmxM.02	MF_V1	SLAS	286266	286267	.	+	.	ID=LmxM.02.0710_SLAS_4;Promastigote=5;Intracellular_Amastigote=0;Axenic_Amastigote=9;
LmxM.02	MF_V1	SLAS	289956	289957	.	+	.	ID=LmxM.02.0720_SLAS_1;Promastigote=227;Intracellular_Amastigote=394;Axenic_Amastigote=417;
LmxM.02	MF_V1	SLAS	289959	289960	.	+	.	ID=LmxM.02.0720_SLAS_2;Promastigote=131;Intracellular_Amastigote=319;Axenic_Amastigote=265;
LmxM.02	MF_V1	SLAS	289966	289967	.	+	.	ID=LmxM.02.0720_SLAS_3;Promastigote=8;Intracellular_Amastigote=29;Axenic_Amastigote=36;
LmxM.02	MF_V1	SLAS	290780	290781	.	+	.	ID=LmxM.02.0730_SLAS_1;Promastigote=2;Intracellular_Amastigote=9;Axenic_Amastigote=13;
LmxM.02	MF_V1	SLAS	290942	290943	.	+	.	ID=LmxM.02.0730_SLAS_2;Promastigote=4;Intracellular_Amastigote=9;Axenic_Amastigote=19;
LmxM.02	MF_V1	SLAS	292517	292518	.	+	.	ID=LmxM.02.0740_SLAS_1;Promastigote=14;Intracellular_Amastigote=5;Axenic_Amastigote=12;
LmxM.02	MF_V1	SLAS	292532	292533	.	+	.	ID=LmxM.02.0740_SLAS_2;Promastigote=9;Intracellular_Amastigote=8;Axenic_Amastigote=7;
LmxM.02	MF_V1	SLAS	292551	292552	.	+	.	ID=LmxM.02.0740_SLAS_3;Promastigote=628;Intracellular_Amastigote=172;Axenic_Amastigote=531;
LmxM.02	MF_V1	SLAS	292572	292573	.	+	.	ID=LmxM.02.0740_SLAS_4;Promastigote=558;Intracellular_Amastigote=293;Axenic_Amastigote=590;
LmxM.02	MF_V1	SLAS	292644	292645	.	+	.	ID=LmxM.02.0740_SLAS_5;Promastigote=20;Intracellular_Amastigote=5;Axenic_Amastigote=16;
LmxM.02	MF_V1	SLAS	292687	292688	.	+	.	ID=LmxM.02.0740_SLAS_6;Promastigote=12;Intracellular_Amastigote=2;Axenic_Amastigote=15;
LmxM.03	MF_V1	SLAS	5402	5403	.	-	.	ID=LmxM.03.0010_SLAS_1;Promastigote=19;Intracellular_Amastigote=11;Axenic_Amastigote=21;
LmxM.03	MF_V1	SLAS	6696	6697	.	+	.	ID=LmxM.03.0020_SLAS_1;Promastigote=2;Intracellular_Amastigote=5;Axenic_Amastigote=3;
LmxM.03	MF_V1	SLAS	8089	8090	.	+	.	ID=LmxM.03.0030_SLAS_1;Promastigote=16;Intracellular_Amastigote=4;Axenic_Amastigote=8;
LmxM.03	MF_V1	SLAS	8104	8105	.	+	.	ID=LmxM.03.0030_SLAS_2;Promastigote=720;Intracellular_Amastigote=109;Axenic_Amastigote=478;
LmxM.03	MF_V1	SLAS	8111	8112	.	+	.	ID=LmxM.03.0030_SLAS_3;Promastigote=37;Intracellular_Amastigote=6;Axenic_Amastigote=24;
LmxM.03	MF_V1	SLAS	8170	8171	.	+	.	ID=LmxM.03.0030_SLAS_4;Promastigote=12;Intracellular_Amastigote=2;Axenic_Amastigote=9;
LmxM.03	MF_V1	SLAS	10276	10277	.	+	.	ID=LmxM.03.0040_SLAS_1;Promastigote=16;Intracellular_Amastigote=12;Axenic_Amastigote=11;
LmxM.03	MF_V1	SLAS	10300	10301	.	+	.	ID=LmxM.03.0040_SLAS_2;Promastigote=12;Intracellular_Amastigote=3;Axenic_Amastigote=15;
LmxM.03	MF_V1	SLAS	10306	10307	.	+	.	ID=LmxM.03.0040_SLAS_3;Promastigote=5;Intracellular_Amastigote=2;Axenic_Amastigote=6;
LmxM.03	MF_V1	SLAS	10370	10371	.	+	.	ID=LmxM.03.0040_SLAS_4;Promastigote=45;Intracellular_Amastigote=34;Axenic_Amastigote=36;
LmxM.03	MF_V1	SLAS	10382	10383	.	+	.	ID=LmxM.03.0040_SLAS_5;Promastigote=11;Intracellular_Amastigote=5;Axenic_Amastigote=7;
LmxM.03	MF_V1	SLAS	10399	10400	.	+	.	ID=LmxM.03.0040_SLAS_6;Promastigote=8;Intracellular_Amastigote=4;Axenic_Amastigote=7;
LmxM.03	MF_V1	SLAS	14592	14593	.	+	.	ID=LmxM.03.0060_SLAS_1;Promastigote=4;Intracellular_Amastigote=1;Axenic_Amastigote=14;
LmxM.03	MF_V1	SLAS	14727	14728	.	+	.	ID=LmxM.03.0060_SLAS_2;Promastigote=44;Intracellular_Amastigote=83;Axenic_Amastigote=55;
LmxM.03	MF_V1	SLAS	14734	14735	.	+	.	ID=LmxM.03.0060_SLAS_3;Promastigote=6;Intracellular_Amastigote=9;Axenic_Amastigote=5;
LmxM.03	MF_V1	SLAS	16552	16553	.	+	.	ID=LmxM.03.0070_SLAS_1;Promastigote=15;Intracellular_Amastigote=27;Axenic_Amastigote=27;
LmxM.03	MF_V1	SLAS	19511	19512	.	+	.	ID=LmxM.03.0080_SLAS_1;Promastigote=16;Intracellular_Amastigote=3;Axenic_Amastigote=14;
LmxM.03	MF_V1	SLAS	19556	19557	.	+	.	ID=LmxM.03.0080_SLAS_2;Promastigote=53;Intracellular_Amastigote=15;Axenic_Amastigote=44;
LmxM.03	MF_V1	SLAS	19560	19561	.	+	.	ID=LmxM.03.0080_SLAS_3;Promastigote=14;Intracellular_Amastigote=12;Axenic_Amastigote=24;
LmxM.03	MF_V1	SLAS	22775	22776	.	+	.	ID=LmxM.03.0090_SLAS_1;Promastigote=666;Intracellular_Amastigote=237;Axenic_Amastigote=434;
LmxM.03	MF_V1	SLAS	22799	22800	.	+	.	ID=LmxM.03.0090_SLAS_2;Promastigote=213;Intracellular_Amastigote=37;Axenic_Amastigote=215;
LmxM.03	MF_V1	SLAS	22805	22806	.	+	.	ID=LmxM.03.0090_SLAS_3;Promastigote=183;Intracellular_Amastigote=38;Axenic_Amastigote=235;
LmxM.03	MF_V1	SLAS	22807	22808	.	+	.	ID=LmxM.03.0090_SLAS_4;Promastigote=5;Intracellular_Amastigote=3;Axenic_Amastigote=13;
LmxM.03	MF_V1	SLAS	22815	22816	.	+	.	ID=LmxM.03.0090_SLAS_5;Promastigote=10;Intracellular_Amastigote=1;Axenic_Amastigote=19;
LmxM.03	MF_V1	SLAS	25869	25870	.	+	.	ID=LmxM.03.0100_SLAS_1;Promastigote=25;Intracellular_Amastigote=28;Axenic_Amastigote=41;
LmxM.03	MF_V1	SLAS	27846	27847	.	+	.	ID=LmxM.03.0110_SLAS_1;Promastigote=59;Intracellular_Amastigote=44;Axenic_Amastigote=70;
LmxM.03	MF_V1	SLAS	31156	31157	.	+	.	ID=LmxM.03.0120_SLAS_1;Promastigote=88;Intracellular_Amastigote=54;Axenic_Amastigote=99;
LmxM.03	MF_V1	SLAS	34875	34876	.	+	.	ID=LmxM.03.0130_SLAS_1;Promastigote=26;Intracellular_Amastigote=7;Axenic_Amastigote=13;
LmxM.03	MF_V1	SLAS	34969	34970	.	+	.	ID=LmxM.03.0130_SLAS_2;Promastigote=6;Intracellular_Amastigote=13;Axenic_Amastigote=8;
LmxM.03	MF_V1	SLAS	35003	35004	.	+	.	ID=LmxM.03.0130_SLAS_3;Promastigote=1431;Intracellular_Amastigote=403;Axenic_Amastigote=1278;
LmxM.03	MF_V1	SLAS	35021	35022	.	+	.	ID=LmxM.03.0130_SLAS_4;Promastigote=30;Intracellular_Amastigote=5;Axenic_Amastigote=25;
LmxM.03	MF_V1	SLAS	35025	35026	.	+	.	ID=LmxM.03.0130_SLAS_5;Promastigote=8;Intracellular_Amastigote=1;Axenic_Amastigote=5;
LmxM.03	MF_V1	SLAS	35087	35088	.	+	.	ID=LmxM.03.0130_SLAS_6;Promastigote=9;Intracellular_Amastigote=6;Axenic_Amastigote=6;
LmxM.03	MF_V1	SLAS	36393	36394	.	+	.	ID=LmxM.03.0140_SLAS_1;Promastigote=32;Intracellular_Amastigote=13;Axenic_Amastigote=36;
LmxM.03	MF_V1	SLAS	36511	36512	.	+	.	ID=LmxM.03.0140_SLAS_2;Promastigote=93;Intracellular_Amastigote=80;Axenic_Amastigote=125;
LmxM.03	MF_V1	SLAS	37979	37980	.	+	.	ID=LmxM.03.0150_SLAS_1;Promastigote=933;Intracellular_Amastigote=424;Axenic_Amastigote=657;
LmxM.03	MF_V1	SLAS	38001	38002	.	+	.	ID=LmxM.03.0150_SLAS_2;Promastigote=84;Intracellular_Amastigote=41;Axenic_Amastigote=94;
LmxM.03	MF_V1	SLAS	38129	38130	.	+	.	ID=LmxM.03.0150_SLAS_3;Promastigote=3;Intracellular_Amastigote=3;Axenic_Amastigote=16;
LmxM.03	MF_V1	SLAS	39788	39789	.	+	.	ID=LmxM.03.0160_SLAS_1;Promastigote=49;Intracellular_Amastigote=32;Axenic_Amastigote=63;
LmxM.03	MF_V1	SLAS	42711	42712	.	+	.	ID=LmxM.03.0170_SLAS_1;Promastigote=18;Intracellular_Amastigote=4;Axenic_Amastigote=4;
LmxM.03	MF_V1	SLAS	42805	42806	.	+	.	ID=LmxM.03.0170_SLAS_2;Promastigote=39;Intracellular_Amastigote=13;Axenic_Amastigote=20;
LmxM.03	MF_V1	SLAS	42815	42816	.	+	.	ID=LmxM.03.0170_SLAS_3;Promastigote=9;Intracellular_Amastigote=3;Axenic_Amastigote=6;
LmxM.03	MF_V1	SLAS	42852	42853	.	+	.	ID=LmxM.03.0170_SLAS_4;Promastigote=335;Intracellular_Amastigote=259;Axenic_Amastigote=333;
LmxM.03	MF_V1	SLAS	42872	42873	.	+	.	ID=LmxM.03.0170_SLAS_5;Promastigote=3;Intracellular_Amastigote=2;Axenic_Amastigote=5;
LmxM.03	MF_V1	SLAS	44094	44095	.	+	.	ID=LmxM.03.0180_SLAS_1;Promastigote=32;Intracellular_Amastigote=32;Axenic_Amastigote=54;
LmxM.03	MF_V1	SLAS	44124	44125	.	+	.	ID=LmxM.03.0180_SLAS_2;Promastigote=6;Intracellular_Amastigote=1;Axenic_Amastigote=6;
LmxM.03	MF_V1	SLAS	46667	46668	.	+	.	ID=LmxM.03.0190_SLAS_1;Promastigote=5;Intracellular_Amastigote=7;Axenic_Amastigote=4;
LmxM.03	MF_V1	SLAS	46698	46699	.	+	.	ID=LmxM.03.0190_SLAS_2;Promastigote=4;Intracellular_Amastigote=2;Axenic_Amastigote=4;
LmxM.03	MF_V1	SLAS	46701	46702	.	+	.	ID=LmxM.03.0190_SLAS_3;Promastigote=6;Intracellular_Amastigote=3;Axenic_Amastigote=1;
LmxM.03	MF_V1	SLAS	46702	46703	.	+	.	ID=LmxM.03.0190_SLAS_4;Promastigote=76;Intracellular_Amastigote=58;Axenic_Amastigote=72;
LmxM.03	MF_V1	SLAS	46715	46716	.	+	.	ID=LmxM.03.0190_SLAS_5;Promastigote=5;Intracellular_Amastigote=3;Axenic_Amastigote=4;
LmxM.03	MF_V1	SLAS	46761	46762	.	+	.	ID=LmxM.03.0190_SLAS_6;Promastigote=40;Intracellular_Amastigote=12;Axenic_Amastigote=62;
LmxM.03	MF_V1	SLAS	46766	46767	.	+	.	ID=LmxM.03.0190_SLAS_7;Promastigote=279;Intracellular_Amastigote=71;Axenic_Amastigote=346;
LmxM.03	MF_V1	SLAS	46768	46769	.	+	.	ID=LmxM.03.0190_SLAS_8;Promastigote=15;Intracellular_Amastigote=12;Axenic_Amastigote=27;
LmxM.03	MF_V1	SLAS	46771	46772	.	+	.	ID=LmxM.03.0190_SLAS_9;Promastigote=38;Intracellular_Amastigote=11;Axenic_Amastigote=41;
LmxM.03	MF_V1	SLAS	46821	46822	.	+	.	ID=LmxM.03.0190_SLAS_10;Promastigote=143;Intracellular_Amastigote=42;Axenic_Amastigote=125;
LmxM.03	MF_V1	SLAS	49198	49199	.	+	.	ID=LmxM.03.0200_SLAS_1;Promastigote=955;Intracellular_Amastigote=296;Axenic_Amastigote=748;
LmxM.03	MF_V1	SLAS	49209	49210	.	+	.	ID=LmxM.03.0200_SLAS_2;Promastigote=40;Intracellular_Amastigote=22;Axenic_Amastigote=48;
LmxM.03	MF_V1	SLAS	52266	52267	.	+	.	ID=LmxM.03.0210_SLAS_1;Promastigote=31;Intracellular_Amastigote=4;Axenic_Amastigote=16;
LmxM.03	MF_V1	SLAS	54625	54626	.	+	.	ID=LmxM.03.0220_SLAS_1;Promastigote=225;Intracellular_Amastigote=150;Axenic_Amastigote=163;
LmxM.03	MF_V1	SLAS	54649	54650	.	+	.	ID=LmxM.03.0220_SLAS_2;Promastigote=29;Intracellular_Amastigote=17;Axenic_Amastigote=31;
LmxM.03	MF_V1	SLAS	56557	56558	.	+	.	ID=LmxM.03.0230_SLAS_1;Promastigote=139;Intracellular_Amastigote=86;Axenic_Amastigote=56;
LmxM.03	MF_V1	SLAS	56572	56573	.	+	.	ID=LmxM.03.0230_SLAS_2;Promastigote=11;Intracellular_Amastigote=6;Axenic_Amastigote=20;
LmxM.03	MF_V1	SLAS	61327	61328	.	+	.	ID=LmxM.03.0240_SLAS_1;Promastigote=9;Intracellular_Amastigote=6;Axenic_Amastigote=15;
LmxM.03	MF_V1	SLAS	61332	61333	.	+	.	ID=LmxM.03.0240_SLAS_2;Promastigote=13;Intracellular_Amastigote=14;Axenic_Amastigote=35;
LmxM.03	MF_V1	SLAS	62013	62014	.	+	.	ID=LmxM.03.0240_SLAS_3;Promastigote=8;Intracellular_Amastigote=2;Axenic_Amastigote=7;
LmxM.03	MF_V1	SLAS	62144	62145	.	+	.	ID=LmxM.03.0240_SLAS_4;Promastigote=112;Intracellular_Amastigote=102;Axenic_Amastigote=188;
LmxM.03	MF_V1	SLAS	62161	62162	.	+	.	ID=LmxM.03.0240_SLAS_5;Promastigote=4;Intracellular_Amastigote=4;Axenic_Amastigote=9;
LmxM.03	MF_V1	SLAS	63146	63147	.	+	.	ID=LmxM.03.0250_SLAS_1;Promastigote=5;Intracellular_Amastigote=8;Axenic_Amastigote=11;
LmxM.03	MF_V1	SLAS	63173	63174	.	+	.	ID=LmxM.03.0250_SLAS_2;Promastigote=21;Intracellular_Amastigote=9;Axenic_Amastigote=15;
LmxM.03	MF_V1	SLAS	63216	63217	.	+	.	ID=LmxM.03.0250_SLAS_3;Promastigote=10726;Intracellular_Amastigote=5940;Axenic_Amastigote=11452;
LmxM.03	MF_V1	SLAS	63220	63221	.	+	.	ID=LmxM.03.0250_SLAS_4;Promastigote=799;Intracellular_Amastigote=600;Axenic_Amastigote=1090;
LmxM.03	MF_V1	SLAS	64466	64467	.	+	.	ID=LmxM.03.0260_SLAS_1;Promastigote=250;Intracellular_Amastigote=67;Axenic_Amastigote=242;
LmxM.03	MF_V1	SLAS	64482	64483	.	+	.	ID=LmxM.03.0260_SLAS_2;Promastigote=6;Intracellular_Amastigote=0;Axenic_Amastigote=9;
LmxM.03	MF_V1	SLAS	64560	64561	.	+	.	ID=LmxM.03.0260_SLAS_3;Promastigote=8;Intracellular_Amastigote=13;Axenic_Amastigote=7;
LmxM.03	MF_V1	SLAS	66446	66447	.	+	.	ID=LmxM.03.0270_SLAS_1;Promastigote=255;Intracellular_Amastigote=173;Axenic_Amastigote=349;
LmxM.03	MF_V1	SLAS	71890	71891	.	+	.	ID=LmxM.03.0280_SLAS_1;Promastigote=7;Intracellular_Amastigote=1;Axenic_Amastigote=17;
LmxM.03	MF_V1	SLAS	77504	77505	.	+	.	ID=LmxM.03_78395_SLAS_1;Promastigote=136;Intracellular_Amastigote=21;Axenic_Amastigote=95;
LmxM.03	MF_V1	SLAS	77511	77512	.	+	.	ID=LmxM.03_78395_SLAS_2;Promastigote=25;Intracellular_Amastigote=13;Axenic_Amastigote=38;
LmxM.03	MF_V1	SLAS	77514	77515	.	+	.	ID=LmxM.03_78395_SLAS_3;Promastigote=14;Intracellular_Amastigote=8;Axenic_Amastigote=15;
LmxM.03	MF_V1	SLAS	77524	77525	.	+	.	ID=LmxM.03_78395_SLAS_4;Promastigote=2;Intracellular_Amastigote=1;Axenic_Amastigote=6;
LmxM.03	MF_V1	SLAS	79585	79586	.	+	.	ID=LmxM.03.0310_SLAS_1;Promastigote=3;Intracellular_Amastigote=0;Axenic_Amastigote=12;
LmxM.03	MF_V1	SLAS	86845	86846	.	+	.	ID=LmxM.03.0320_SLAS_1;Promastigote=10;Intracellular_Amastigote=2;Axenic_Amastigote=9;
LmxM.03	MF_V1	SLAS	86887	86888	.	+	.	ID=LmxM.03.0320_SLAS_2;Promastigote=263;Intracellular_Amastigote=102;Axenic_Amastigote=440;
LmxM.03	MF_V1	SLAS	86890	86891	.	+	.	ID=LmxM.03.0320_SLAS_3;Promastigote=47;Intracellular_Amastigote=18;Axenic_Amastigote=90;
LmxM.03	MF_V1	SLAS	90922	90923	.	+	.	ID=LmxM.03.0330_SLAS_1;Promastigote=57;Intracellular_Amastigote=26;Axenic_Amastigote=132;
LmxM.03	MF_V1	SLAS	91070	91071	.	+	.	ID=LmxM.03.0330_SLAS_2;Promastigote=19;Intracellular_Amastigote=12;Axenic_Amastigote=31;
LmxM.03	MF_V1	SLAS	93825	93826	.	+	.	ID=LmxM.03.0340_SLAS_1;Promastigote=40;Intracellular_Amastigote=25;Axenic_Amastigote=39;
LmxM.03	MF_V1	SLAS	95756	95757	.	+	.	ID=LmxM.03.0350_SLAS_1;Promastigote=18;Intracellular_Amastigote=4;Axenic_Amastigote=30;
LmxM.03	MF_V1	SLAS	101159	101160	.	+	.	ID=LmxM.03_101644_SLAS_1;Promastigote=31;Intracellular_Amastigote=0;Axenic_Amastigote=15;
LmxM.03	MF_V1	SLAS	101257	101258	.	+	.	ID=LmxM.03_101644_SLAS_2;Promastigote=14;Intracellular_Amastigote=6;Axenic_Amastigote=17;
LmxM.03	MF_V1	SLAS	102449	102450	.	+	.	ID=LmxM.03.0360_SLAS_1;Promastigote=19;Intracellular_Amastigote=1;Axenic_Amastigote=6;
LmxM.03	MF_V1	SLAS	102451	102452	.	+	.	ID=LmxM.03.0360_SLAS_2;Promastigote=44;Intracellular_Amastigote=3;Axenic_Amastigote=11;
LmxM.03	MF_V1	SLAS	111188	111189	.	+	.	ID=LmxM.03.0370_SLAS_1;Promastigote=86;Intracellular_Amastigote=64;Axenic_Amastigote=76;
LmxM.03	MF_V1	SLAS	111191	111192	.	+	.	ID=LmxM.03.0370_SLAS_2;Promastigote=58;Intracellular_Amastigote=81;Axenic_Amastigote=96;
LmxM.03	MF_V1	SLAS	111274	111275	.	+	.	ID=LmxM.03.0370_SLAS_3;Promastigote=2;Intracellular_Amastigote=7;Axenic_Amastigote=2;
LmxM.03	MF_V1	SLAS	111280	111281	.	+	.	ID=LmxM.03.0370_SLAS_4;Promastigote=14;Intracellular_Amastigote=16;Axenic_Amastigote=18;
LmxM.03	MF_V1	SLAS	114205	114206	.	+	.	ID=LmxM.03.0380_SLAS_1;Promastigote=2;Intracellular_Amastigote=9;Axenic_Amastigote=3;
LmxM.03	MF_V1	SLAS	114908	114909	.	+	.	ID=LmxM.03.0380_SLAS_2;Promastigote=21;Intracellular_Amastigote=22;Axenic_Amastigote=26;
LmxM.03	MF_V1	SLAS	114911	114912	.	+	.	ID=LmxM.03.0380_SLAS_3;Promastigote=64;Intracellular_Amastigote=166;Axenic_Amastigote=131;
LmxM.03	MF_V1	SLAS	114990	114991	.	+	.	ID=LmxM.03.0380_SLAS_4;Promastigote=7;Intracellular_Amastigote=20;Axenic_Amastigote=21;
LmxM.03	MF_V1	SLAS	118631	118632	.	+	.	ID=LmxM.03.0390_SLAS_1;Promastigote=110;Intracellular_Amastigote=100;Axenic_Amastigote=110;
LmxM.03	MF_V1	SLAS	120205	120206	.	+	.	ID=LmxM.03.0400_SLAS_1;Promastigote=1818;Intracellular_Amastigote=1249;Axenic_Amastigote=3585;
LmxM.03	MF_V1	SLAS	120325	120326	.	+	.	ID=LmxM.03.0400_SLAS_2;Promastigote=5;Intracellular_Amastigote=0;Axenic_Amastigote=7;
LmxM.03	MF_V1	SLAS	123637	123638	.	+	.	ID=LmxM.03.0410_SLAS_1;Promastigote=0;Intracellular_Amastigote=11;Axenic_Amastigote=7;
LmxM.03	MF_V1	SLAS	124308	124309	.	+	.	ID=LmxM.03.0410_SLAS_2;Promastigote=424;Intracellular_Amastigote=30;Axenic_Amastigote=100;
LmxM.03	MF_V1	SLAS	124357	124358	.	+	.	ID=LmxM.03.0410_SLAS_3;Promastigote=142;Intracellular_Amastigote=27;Axenic_Amastigote=131;
LmxM.03	MF_V1	SLAS	124371	124372	.	+	.	ID=LmxM.03.0410_SLAS_4;Promastigote=12;Intracellular_Amastigote=5;Axenic_Amastigote=9;
LmxM.03	MF_V1	SLAS	124377	124378	.	+	.	ID=LmxM.03.0410_SLAS_5;Promastigote=8;Intracellular_Amastigote=4;Axenic_Amastigote=9;
LmxM.03	MF_V1	SLAS	128572	128573	.	+	.	ID=LmxM.03.0420_SLAS_1;Promastigote=24;Intracellular_Amastigote=15;Axenic_Amastigote=46;
LmxM.03	MF_V1	SLAS	128575	128576	.	+	.	ID=LmxM.03.0420_SLAS_2;Promastigote=33;Intracellular_Amastigote=25;Axenic_Amastigote=64;
LmxM.03	MF_V1	SLAS	128577	128578	.	+	.	ID=LmxM.03.0420_SLAS_3;Promastigote=21;Intracellular_Amastigote=14;Axenic_Amastigote=26;
LmxM.03	MF_V1	SLAS	128584	128585	.	+	.	ID=LmxM.03.0420_SLAS_4;Promastigote=38;Intracellular_Amastigote=17;Axenic_Amastigote=40;
LmxM.03	MF_V1	SLAS	128617	128618	.	+	.	ID=LmxM.03.0420_SLAS_5;Promastigote=13;Intracellular_Amastigote=13;Axenic_Amastigote=31;
LmxM.03	MF_V1	SLAS	135226	135227	.	+	.	ID=LmxM.03.0430_SLAS_1;Promastigote=15;Intracellular_Amastigote=10;Axenic_Amastigote=10;
LmxM.03	MF_V1	SLAS	135275	135276	.	+	.	ID=LmxM.03.0430_SLAS_2;Promastigote=3;Intracellular_Amastigote=2;Axenic_Amastigote=31;
LmxM.03	MF_V1	SLAS	136494	136495	.	+	.	ID=LmxM.03.0440_SLAS_1;Promastigote=43605;Intracellular_Amastigote=9625;Axenic_Amastigote=35897;
LmxM.03	MF_V1	SLAS	136507	136508	.	+	.	ID=LmxM.03.0440_SLAS_2;Promastigote=374;Intracellular_Amastigote=150;Axenic_Amastigote=778;
LmxM.03	MF_V1	SLAS	136522	136523	.	+	.	ID=LmxM.03.0440_SLAS_3;Promastigote=9;Intracellular_Amastigote=2;Axenic_Amastigote=23;
LmxM.03	MF_V1	SLAS	137455	137456	.	+	.	ID=LmxM.03.0450_SLAS_1;Promastigote=336;Intracellular_Amastigote=57;Axenic_Amastigote=341;
LmxM.03	MF_V1	SLAS	143619	143620	.	+	.	ID=LmxM.03.0460_SLAS_1;Promastigote=3;Intracellular_Amastigote=1;Axenic_Amastigote=9;
LmxM.03	MF_V1	SLAS	143623	143624	.	+	.	ID=LmxM.03.0460_SLAS_2;Promastigote=61;Intracellular_Amastigote=20;Axenic_Amastigote=86;
LmxM.03	MF_V1	SLAS	153327	153328	.	+	.	ID=LmxM.03_153620_SLAS_1;Promastigote=221;Intracellular_Amastigote=32;Axenic_Amastigote=195;
LmxM.03	MF_V1	SLAS	153335	153336	.	+	.	ID=LmxM.03_153620_SLAS_2;Promastigote=189;Intracellular_Amastigote=25;Axenic_Amastigote=172;
LmxM.03	MF_V1	SLAS	153338	153339	.	+	.	ID=LmxM.03_153620_SLAS_3;Promastigote=2;Intracellular_Amastigote=0;Axenic_Amastigote=7;
LmxM.03	MF_V1	SLAS	153359	153360	.	+	.	ID=LmxM.03_153620_SLAS_4;Promastigote=123;Intracellular_Amastigote=37;Axenic_Amastigote=201;
LmxM.03	MF_V1	SLAS	153376	153377	.	+	.	ID=LmxM.03_153620_SLAS_5;Promastigote=54;Intracellular_Amastigote=59;Axenic_Amastigote=106;
LmxM.03	MF_V1	SLAS	153394	153395	.	+	.	ID=LmxM.03_153620_SLAS_6;Promastigote=13;Intracellular_Amastigote=8;Axenic_Amastigote=21;
LmxM.03	MF_V1	SLAS	155024	155025	.	+	.	ID=LmxM.03.0470_SLAS_1;Promastigote=17;Intracellular_Amastigote=9;Axenic_Amastigote=33;
LmxM.03	MF_V1	SLAS	155026	155027	.	+	.	ID=LmxM.03.0470_SLAS_2;Promastigote=8;Intracellular_Amastigote=1;Axenic_Amastigote=4;
LmxM.03	MF_V1	SLAS	155042	155043	.	+	.	ID=LmxM.03.0470_SLAS_3;Promastigote=26;Intracellular_Amastigote=22;Axenic_Amastigote=17;
LmxM.03	MF_V1	SLAS	155079	155080	.	+	.	ID=LmxM.03.0470_SLAS_4;Promastigote=8;Intracellular_Amastigote=6;Axenic_Amastigote=11;
LmxM.03	MF_V1	SLAS	155088	155089	.	+	.	ID=LmxM.03.0470_SLAS_5;Promastigote=1;Intracellular_Amastigote=2;Axenic_Amastigote=7;
LmxM.03	MF_V1	SLAS	155465	155466	.	+	.	ID=LmxM.03.0470_SLAS_6;Promastigote=3;Intracellular_Amastigote=6;Axenic_Amastigote=3;
LmxM.03	MF_V1	SLAS	159687	159688	.	+	.	ID=LmxM.03.0480_SLAS_1;Promastigote=105;Intracellular_Amastigote=29;Axenic_Amastigote=157;
LmxM.03	MF_V1	SLAS	159710	159711	.	+	.	ID=LmxM.03.0480_SLAS_2;Promastigote=7;Intracellular_Amastigote=16;Axenic_Amastigote=14;
LmxM.03	MF_V1	SLAS	164428	164429	.	+	.	ID=LmxM.03.0490_SLAS_1;Promastigote=216;Intracellular_Amastigote=60;Axenic_Amastigote=306;
LmxM.03	MF_V1	SLAS	166900	166901	.	+	.	ID=LmxM.03.0490_SLAS_2;Promastigote=4;Intracellular_Amastigote=6;Axenic_Amastigote=17;
LmxM.03	MF_V1	SLAS	168532	168533	.	+	.	ID=LmxM.03.0500_SLAS_1;Promastigote=6;Intracellular_Amastigote=10;Axenic_Amastigote=34;
LmxM.03	MF_V1	SLAS	173011	173012	.	+	.	ID=LmxM.03.0510_SLAS_1;Promastigote=99;Intracellular_Amastigote=62;Axenic_Amastigote=168;
LmxM.03	MF_V1	SLAS	181322	181323	.	+	.	ID=LmxM.03.0520_SLAS_1;Promastigote=44;Intracellular_Amastigote=18;Axenic_Amastigote=47;
LmxM.03	MF_V1	SLAS	184746	184747	.	+	.	ID=LmxM.03.0530_SLAS_1;Promastigote=71;Intracellular_Amastigote=47;Axenic_Amastigote=98;
LmxM.03	MF_V1	SLAS	184759	184760	.	+	.	ID=LmxM.03.0530_SLAS_2;Promastigote=13;Intracellular_Amastigote=5;Axenic_Amastigote=15;
LmxM.03	MF_V1	SLAS	193082	193083	.	+	.	ID=LmxM.03.0540_SLAS_1;Promastigote=895;Intracellular_Amastigote=240;Axenic_Amastigote=862;
LmxM.03	MF_V1	SLAS	195951	195952	.	+	.	ID=LmxM.03.0550_SLAS_1;Promastigote=76;Intracellular_Amastigote=64;Axenic_Amastigote=145;
LmxM.03	MF_V1	SLAS	201033	201034	.	+	.	ID=LmxM.03.0560_SLAS_1;Promastigote=83;Intracellular_Amastigote=51;Axenic_Amastigote=192;
LmxM.03	MF_V1	SLAS	201036	201037	.	+	.	ID=LmxM.03.0560_SLAS_2;Promastigote=10;Intracellular_Amastigote=12;Axenic_Amastigote=35;
LmxM.03	MF_V1	SLAS	201154	201155	.	+	.	ID=LmxM.03.0560_SLAS_3;Promastigote=2;Intracellular_Amastigote=6;Axenic_Amastigote=5;
LmxM.03	MF_V1	SLAS	204097	204098	.	+	.	ID=LmxM.03_204918_SLAS_1;Promastigote=4;Intracellular_Amastigote=8;Axenic_Amastigote=6;
LmxM.03	MF_V1	SLAS	204410	204411	.	+	.	ID=LmxM.03_204918_SLAS_2;Promastigote=10;Intracellular_Amastigote=1;Axenic_Amastigote=3;
LmxM.03	MF_V1	SLAS	204574	204575	.	+	.	ID=LmxM.03_204918_SLAS_3;Promastigote=36;Intracellular_Amastigote=41;Axenic_Amastigote=62;
LmxM.03	MF_V1	SLAS	204656	204657	.	+	.	ID=LmxM.03_204918_SLAS_4;Promastigote=1;Intracellular_Amastigote=3;Axenic_Amastigote=8;
LmxM.03	MF_V1	SLAS	206102	206103	.	+	.	ID=LmxM.03.0570_SLAS_1;Promastigote=18;Intracellular_Amastigote=53;Axenic_Amastigote=13;
LmxM.03	MF_V1	SLAS	207485	207486	.	+	.	ID=LmxM.03.0580_SLAS_1;Promastigote=9;Intracellular_Amastigote=2;Axenic_Amastigote=7;
LmxM.03	MF_V1	SLAS	209176	209177	.	+	.	ID=LmxM.03.0590_SLAS_1;Promastigote=18;Intracellular_Amastigote=7;Axenic_Amastigote=23;
LmxM.03	MF_V1	SLAS	209200	209201	.	+	.	ID=LmxM.03.0590_SLAS_2;Promastigote=10;Intracellular_Amastigote=5;Axenic_Amastigote=17;
LmxM.03	MF_V1	SLAS	214287	214288	.	+	.	ID=LmxM.03.0600_SLAS_1;Promastigote=470;Intracellular_Amastigote=103;Axenic_Amastigote=394;
LmxM.03	MF_V1	SLAS	214293	214294	.	+	.	ID=LmxM.03.0600_SLAS_2;Promastigote=22;Intracellular_Amastigote=7;Axenic_Amastigote=40;
LmxM.03	MF_V1	SLAS	214305	214306	.	+	.	ID=LmxM.03.0600_SLAS_3;Promastigote=4;Intracellular_Amastigote=0;Axenic_Amastigote=5;
LmxM.03	MF_V1	SLAS	216346	216347	.	+	.	ID=LmxM.03.0610_SLAS_1;Promastigote=73;Intracellular_Amastigote=268;Axenic_Amastigote=200;
LmxM.03	MF_V1	SLAS	216367	216368	.	+	.	ID=LmxM.03.0610_SLAS_2;Promastigote=0;Intracellular_Amastigote=7;Axenic_Amastigote=17;
LmxM.03	MF_V1	SLAS	217187	217188	.	+	.	ID=LmxM.03.0610_SLAS_3;Promastigote=13;Intracellular_Amastigote=0;Axenic_Amastigote=17;
LmxM.03	MF_V1	SLAS	217312	217313	.	+	.	ID=LmxM.03.0610_SLAS_4;Promastigote=21;Intracellular_Amastigote=40;Axenic_Amastigote=35;
LmxM.03	MF_V1	SLAS	217314	217315	.	+	.	ID=LmxM.03.0610_SLAS_5;Promastigote=5;Intracellular_Amastigote=6;Axenic_Amastigote=3;
LmxM.03	MF_V1	SLAS	217318	217319	.	+	.	ID=LmxM.03.0610_SLAS_6;Promastigote=5;Intracellular_Amastigote=10;Axenic_Amastigote=15;
LmxM.03	MF_V1	SLAS	217320	217321	.	+	.	ID=LmxM.03.0610_SLAS_7;Promastigote=26;Intracellular_Amastigote=52;Axenic_Amastigote=73;
LmxM.03	MF_V1	SLAS	217340	217341	.	+	.	ID=LmxM.03.0610_SLAS_8;Promastigote=28;Intracellular_Amastigote=12;Axenic_Amastigote=50;
LmxM.03	MF_V1	SLAS	219384	219385	.	+	.	ID=LmxM.03.0620_SLAS_1;Promastigote=12;Intracellular_Amastigote=2;Axenic_Amastigote=14;
LmxM.03	MF_V1	SLAS	219484	219485	.	+	.	ID=LmxM.03.0620_SLAS_2;Promastigote=0;Intracellular_Amastigote=4;Axenic_Amastigote=7;
LmxM.03	MF_V1	SLAS	222859	222860	.	+	.	ID=LmxM.03.0630_SLAS_1;Promastigote=26;Intracellular_Amastigote=32;Axenic_Amastigote=36;
LmxM.03	MF_V1	SLAS	222892	222893	.	+	.	ID=LmxM.03.0630_SLAS_2;Promastigote=121;Intracellular_Amastigote=81;Axenic_Amastigote=148;
LmxM.03	MF_V1	SLAS	222908	222909	.	+	.	ID=LmxM.03.0630_SLAS_3;Promastigote=5;Intracellular_Amastigote=10;Axenic_Amastigote=15;
LmxM.03	MF_V1	SLAS	224379	224380	.	+	.	ID=LmxM.03.0640_SLAS_1;Promastigote=12;Intracellular_Amastigote=22;Axenic_Amastigote=32;
LmxM.03	MF_V1	SLAS	224450	224451	.	+	.	ID=LmxM.03.0640_SLAS_2;Promastigote=9;Intracellular_Amastigote=6;Axenic_Amastigote=5;
LmxM.03	MF_V1	SLAS	224463	224464	.	+	.	ID=LmxM.03.0640_SLAS_3;Promastigote=27;Intracellular_Amastigote=29;Axenic_Amastigote=43;
LmxM.03	MF_V1	SLAS	224470	224471	.	+	.	ID=LmxM.03.0640_SLAS_4;Promastigote=6;Intracellular_Amastigote=10;Axenic_Amastigote=6;
LmxM.03	MF_V1	SLAS	228014	228015	.	+	.	ID=LmxM.03.0650_SLAS_1;Promastigote=4;Intracellular_Amastigote=3;Axenic_Amastigote=7;
LmxM.03	MF_V1	SLAS	228752	228753	.	+	.	ID=LmxM.03.0650_SLAS_2;Promastigote=6;Intracellular_Amastigote=1;Axenic_Amastigote=11;
LmxM.03	MF_V1	SLAS	232452	232453	.	+	.	ID=LmxM.03.0660_SLAS_1;Promastigote=18;Intracellular_Amastigote=1;Axenic_Amastigote=8;
LmxM.03	MF_V1	SLAS	232506	232507	.	+	.	ID=LmxM.03.0660_SLAS_2;Promastigote=9;Intracellular_Amastigote=0;Axenic_Amastigote=3;
LmxM.03	MF_V1	SLAS	232927	232928	.	+	.	ID=LmxM.03.0660_SLAS_3;Promastigote=68;Intracellular_Amastigote=48;Axenic_Amastigote=109;
LmxM.03	MF_V1	SLAS	236264	236265	.	+	.	ID=LmxM.03.0670_SLAS_1;Promastigote=39;Intracellular_Amastigote=15;Axenic_Amastigote=52;
LmxM.03	MF_V1	SLAS	247559	247560	.	+	.	ID=LmxM.03.0680_SLAS_1;Promastigote=9;Intracellular_Amastigote=2;Axenic_Amastigote=2;
LmxM.03	MF_V1	SLAS	247563	247564	.	+	.	ID=LmxM.03.0680_SLAS_2;Promastigote=4;Intracellular_Amastigote=3;Axenic_Amastigote=4;
LmxM.03	MF_V1	SLAS	247588	247589	.	+	.	ID=LmxM.03.0680_SLAS_3;Promastigote=14;Intracellular_Amastigote=14;Axenic_Amastigote=10;
LmxM.03	MF_V1	SLAS	257437	257438	.	-	.	ID=LmxM.03.0690_SLAS_2;Promastigote=8;Intracellular_Amastigote=2;Axenic_Amastigote=7;
LmxM.03	MF_V1	SLAS	257493	257494	.	-	.	ID=LmxM.03.0690_SLAS_1;Promastigote=81;Intracellular_Amastigote=7;Axenic_Amastigote=28;
LmxM.03	MF_V1	SLAS	266684	266685	.	-	.	ID=LmxM.03.0700_SLAS_2;Promastigote=16;Intracellular_Amastigote=6;Axenic_Amastigote=21;
LmxM.03	MF_V1	SLAS	266734	266735	.	-	.	ID=LmxM.03.0700_SLAS_1;Promastigote=5;Intracellular_Amastigote=5;Axenic_Amastigote=3;
LmxM.03	MF_V1	SLAS	268406	268407	.	-	.	ID=LmxM.03.0710_SLAS_2;Promastigote=22;Intracellular_Amastigote=12;Axenic_Amastigote=15;
LmxM.03	MF_V1	SLAS	268454	268455	.	-	.	ID=LmxM.03.0710_SLAS_1;Promastigote=7;Intracellular_Amastigote=2;Axenic_Amastigote=2;
LmxM.03	MF_V1	SLAS	271911	271912	.	-	.	ID=LmxM.03.0720_SLAS_1;Promastigote=1;Intracellular_Amastigote=4;Axenic_Amastigote=7;
LmxM.03	MF_V1	SLAS	274499	274500	.	-	.	ID=LmxM.03.0730_SLAS_3;Promastigote=3;Intracellular_Amastigote=1;Axenic_Amastigote=6;
LmxM.03	MF_V1	SLAS	274517	274518	.	-	.	ID=LmxM.03.0730_SLAS_2;Promastigote=328;Intracellular_Amastigote=115;Axenic_Amastigote=217;
LmxM.03	MF_V1	SLAS	274524	274525	.	-	.	ID=LmxM.03.0730_SLAS_1;Promastigote=429;Intracellular_Amastigote=162;Axenic_Amastigote=191;
LmxM.03	MF_V1	SLAS	275643	275644	.	-	.	ID=LmxM.03.0740_SLAS_2;Promastigote=4;Intracellular_Amastigote=6;Axenic_Amastigote=20;
LmxM.03	MF_V1	SLAS	275655	275656	.	-	.	ID=LmxM.03.0740_SLAS_1;Promastigote=117;Intracellular_Amastigote=46;Axenic_Amastigote=146;
LmxM.03	MF_V1	SLAS	278379	278380	.	-	.	ID=LmxM.03.0750_SLAS_2;Promastigote=4;Intracellular_Amastigote=2;Axenic_Amastigote=8;
LmxM.03	MF_V1	SLAS	278474	278475	.	-	.	ID=LmxM.03.0750_SLAS_1;Promastigote=46;Intracellular_Amastigote=12;Axenic_Amastigote=68;
LmxM.03	MF_V1	SLAS	280271	280272	.	-	.	ID=LmxM.03.0760_SLAS_1;Promastigote=45;Intracellular_Amastigote=16;Axenic_Amastigote=72;
LmxM.03	MF_V1	SLAS	282556	282557	.	-	.	ID=LmxM.03.0770_SLAS_2;Promastigote=29;Intracellular_Amastigote=4;Axenic_Amastigote=31;
LmxM.03	MF_V1	SLAS	282575	282576	.	-	.	ID=LmxM.03.0770_SLAS_1;Promastigote=59;Intracellular_Amastigote=16;Axenic_Amastigote=49;
LmxM.03	MF_V1	SLAS	293481	293482	.	-	.	ID=LmxM.03.0780_SLAS_1;Promastigote=356;Intracellular_Amastigote=30;Axenic_Amastigote=405;
LmxM.03	MF_V1	SLAS	295401	295402	.	-	.	ID=LmxM.03.0790_SLAS_2;Promastigote=2;Intracellular_Amastigote=5;Axenic_Amastigote=2;
LmxM.03	MF_V1	SLAS	295424	295425	.	-	.	ID=LmxM.03.0790_SLAS_1;Promastigote=88;Intracellular_Amastigote=56;Axenic_Amastigote=229;
LmxM.03	MF_V1	SLAS	303825	303826	.	-	.	ID=LmxM.03.0800_SLAS_2;Promastigote=25;Intracellular_Amastigote=7;Axenic_Amastigote=28;
LmxM.03	MF_V1	SLAS	303951	303952	.	-	.	ID=LmxM.03.0800_SLAS_1;Promastigote=43;Intracellular_Amastigote=24;Axenic_Amastigote=59;
LmxM.03	MF_V1	SLAS	308127	308128	.	-	.	ID=LmxM.03.0810_SLAS_2;Promastigote=26;Intracellular_Amastigote=1;Axenic_Amastigote=27;
LmxM.03	MF_V1	SLAS	308135	308136	.	-	.	ID=LmxM.03.0810_SLAS_1;Promastigote=115;Intracellular_Amastigote=27;Axenic_Amastigote=95;
LmxM.03	MF_V1	SLAS	317707	317708	.	-	.	ID=LmxM.03.0820_SLAS_1;Promastigote=2;Intracellular_Amastigote=0;Axenic_Amastigote=9;
LmxM.03	MF_V1	SLAS	320245	320246	.	-	.	ID=LmxM.03.0821_SLAS_2;Promastigote=42;Intracellular_Amastigote=19;Axenic_Amastigote=102;
LmxM.03	MF_V1	SLAS	320295	320296	.	-	.	ID=LmxM.03.0821_SLAS_1;Promastigote=143;Intracellular_Amastigote=99;Axenic_Amastigote=170;
LmxM.03	MF_V1	SLAS	322164	322165	.	-	.	ID=LmxM.03.0830_SLAS_1;Promastigote=32;Intracellular_Amastigote=11;Axenic_Amastigote=44;
LmxM.03	MF_V1	SLAS	326053	326054	.	-	.	ID=LmxM.03.0840_SLAS_2;Promastigote=309;Intracellular_Amastigote=378;Axenic_Amastigote=418;
LmxM.03	MF_V1	SLAS	326272	326273	.	-	.	ID=LmxM.03.0840_SLAS_1;Promastigote=5;Intracellular_Amastigote=2;Axenic_Amastigote=5;
LmxM.03	MF_V1	SLAS	333816	333817	.	-	.	ID=LmxM.03.0850_SLAS_2;Promastigote=7;Intracellular_Amastigote=1;Axenic_Amastigote=10;
LmxM.03	MF_V1	SLAS	334160	334161	.	-	.	ID=LmxM.03.0850_SLAS_1;Promastigote=30;Intracellular_Amastigote=20;Axenic_Amastigote=47;
LmxM.03	MF_V1	SLAS	339353	339354	.	-	.	ID=LmxM.03.0860_SLAS_2;Promastigote=17;Intracellular_Amastigote=9;Axenic_Amastigote=28;
LmxM.03	MF_V1	SLAS	339364	339365	.	-	.	ID=LmxM.03.0860_SLAS_1;Promastigote=53;Intracellular_Amastigote=41;Axenic_Amastigote=77;
LmxM.03	MF_V1	SLAS	344247	344248	.	-	.	ID=LmxM.03.0870_SLAS_4;Promastigote=28;Intracellular_Amastigote=6;Axenic_Amastigote=36;
LmxM.03	MF_V1	SLAS	344268	344269	.	-	.	ID=LmxM.03.0870_SLAS_3;Promastigote=569;Intracellular_Amastigote=197;Axenic_Amastigote=627;
LmxM.03	MF_V1	SLAS	344470	344471	.	-	.	ID=LmxM.03.0870_SLAS_2;Promastigote=8;Intracellular_Amastigote=0;Axenic_Amastigote=6;
LmxM.03	MF_V1	SLAS	344486	344487	.	-	.	ID=LmxM.03.0870_SLAS_1;Promastigote=48;Intracellular_Amastigote=7;Axenic_Amastigote=21;
LmxM.03	MF_V1	SLAS	351414	351415	.	-	.	ID=LmxM.03.0880_SLAS_2;Promastigote=42;Intracellular_Amastigote=25;Axenic_Amastigote=62;
LmxM.03	MF_V1	SLAS	351417	351418	.	-	.	ID=LmxM.03.0880_SLAS_1;Promastigote=2;Intracellular_Amastigote=3;Axenic_Amastigote=6;
LmxM.03	MF_V1	SLAS	354363	354364	.	-	.	ID=LmxM.03.0890_SLAS_4;Promastigote=16;Intracellular_Amastigote=11;Axenic_Amastigote=10;
LmxM.03	MF_V1	SLAS	355025	355026	.	-	.	ID=LmxM.03.0890_SLAS_3;Promastigote=11;Intracellular_Amastigote=59;Axenic_Amastigote=47;
LmxM.03	MF_V1	SLAS	355060	355061	.	-	.	ID=LmxM.03.0890_SLAS_2;Promastigote=6;Intracellular_Amastigote=16;Axenic_Amastigote=28;
LmxM.03	MF_V1	SLAS	355078	355079	.	-	.	ID=LmxM.03.0890_SLAS_1;Promastigote=844;Intracellular_Amastigote=2117;Axenic_Amastigote=1494;
LmxM.03	MF_V1	SLAS	357571	357572	.	-	.	ID=LmxM.03.0900_SLAS_3;Promastigote=60;Intracellular_Amastigote=19;Axenic_Amastigote=93;
LmxM.03	MF_V1	SLAS	357625	357626	.	-	.	ID=LmxM.03.0900_SLAS_2;Promastigote=6;Intracellular_Amastigote=6;Axenic_Amastigote=8;
LmxM.03	MF_V1	SLAS	357664	357665	.	-	.	ID=LmxM.03.0900_SLAS_1;Promastigote=58;Intracellular_Amastigote=24;Axenic_Amastigote=41;
LmxM.03	MF_V1	SLAS	359361	359362	.	-	.	ID=LmxM.03.0910_SLAS_1;Promastigote=100;Intracellular_Amastigote=27;Axenic_Amastigote=190;
LmxM.03	MF_V1	SLAS	360658	360659	.	-	.	ID=LmxM.03.0920_SLAS_2;Promastigote=4;Intracellular_Amastigote=6;Axenic_Amastigote=21;
LmxM.03	MF_V1	SLAS	360691	360692	.	-	.	ID=LmxM.03.0920_SLAS_1;Promastigote=56;Intracellular_Amastigote=146;Axenic_Amastigote=106;
LmxM.03	MF_V1	SLAS	363532	363533	.	-	.	ID=LmxM.03.0930_SLAS_1;Promastigote=68;Intracellular_Amastigote=30;Axenic_Amastigote=147;
LmxM.03	MF_V1	SLAS	365164	365165	.	-	.	ID=LmxM.03.0940_SLAS_2;Promastigote=5;Intracellular_Amastigote=4;Axenic_Amastigote=4;
LmxM.03	MF_V1	SLAS	365201	365202	.	-	.	ID=LmxM.03.0940_SLAS_1;Promastigote=135;Intracellular_Amastigote=190;Axenic_Amastigote=304;
LmxM.03	MF_V1	SLAS	368303	368304	.	-	.	ID=LmxM.03.0950_SLAS_2;Promastigote=3;Intracellular_Amastigote=4;Axenic_Amastigote=22;
LmxM.03	MF_V1	SLAS	368325	368326	.	-	.	ID=LmxM.03.0950_SLAS_1;Promastigote=235;Intracellular_Amastigote=204;Axenic_Amastigote=712;
LmxM.03	MF_V1	SLAS	369291	369292	.	-	.	ID=LmxM.03.0960_SLAS_3;Promastigote=6;Intracellular_Amastigote=5;Axenic_Amastigote=23;
LmxM.03	MF_V1	SLAS	369294	369295	.	-	.	ID=LmxM.03.0960_SLAS_2;Promastigote=21;Intracellular_Amastigote=14;Axenic_Amastigote=33;
LmxM.03	MF_V1	SLAS	369297	369298	.	-	.	ID=LmxM.03.0960_SLAS_1;Promastigote=474;Intracellular_Amastigote=374;Axenic_Amastigote=538;
LmxM.03	MF_V1	SLAS	370755	370756	.	-	.	ID=LmxM.03.0970_SLAS_2;Promastigote=26;Intracellular_Amastigote=5;Axenic_Amastigote=8;
LmxM.03	MF_V1	SLAS	370771	370772	.	-	.	ID=LmxM.03.0970_SLAS_1;Promastigote=56;Intracellular_Amastigote=28;Axenic_Amastigote=43;
LmxM.03	MF_V1	SLAS	372686	372687	.	-	.	ID=LmxM.03.0980_SLAS_1;Promastigote=43;Intracellular_Amastigote=39;Axenic_Amastigote=51;
LmxM.04	MF_V1	SLAS	4238	4239	.	+	.	ID=LmxM.04.0010_SLAS_1;Promastigote=91;Intracellular_Amastigote=30;Axenic_Amastigote=117;
LmxM.04	MF_V1	SLAS	8230	8231	.	+	.	ID=LmxM.04.0020_SLAS_1;Promastigote=4;Intracellular_Amastigote=18;Axenic_Amastigote=16;
LmxM.04	MF_V1	SLAS	8237	8238	.	+	.	ID=LmxM.04.0020_SLAS_2;Promastigote=1;Intracellular_Amastigote=8;Axenic_Amastigote=1;
LmxM.04	MF_V1	SLAS	15324	15325	.	+	.	ID=LmxM.04.0035_SLAS_1;Promastigote=31;Intracellular_Amastigote=18;Axenic_Amastigote=55;
LmxM.04	MF_V1	SLAS	16073	16074	.	+	.	ID=LmxM.04.0040_SLAS_1;Promastigote=233;Intracellular_Amastigote=43;Axenic_Amastigote=106;
LmxM.04	MF_V1	SLAS	19514	19515	.	+	.	ID=LmxM.04.0045_SLAS_1;Promastigote=5;Intracellular_Amastigote=3;Axenic_Amastigote=1;
LmxM.04	MF_V1	SLAS	21482	21483	.	+	.	ID=LmxM.04.0045_SLAS_2;Promastigote=27;Intracellular_Amastigote=56;Axenic_Amastigote=40;
LmxM.04	MF_V1	SLAS	21493	21494	.	+	.	ID=LmxM.04.0045_SLAS_3;Promastigote=12;Intracellular_Amastigote=17;Axenic_Amastigote=18;
LmxM.04	MF_V1	SLAS	22459	22460	.	+	.	ID=LmxM.04.0050_SLAS_1;Promastigote=494;Intracellular_Amastigote=112;Axenic_Amastigote=632;
LmxM.04	MF_V1	SLAS	22511	22512	.	+	.	ID=LmxM.04.0050_SLAS_2;Promastigote=15;Intracellular_Amastigote=5;Axenic_Amastigote=17;
LmxM.04	MF_V1	SLAS	25279	25280	.	+	.	ID=LmxM.04.0060_SLAS_1;Promastigote=3;Intracellular_Amastigote=3;Axenic_Amastigote=7;
LmxM.04	MF_V1	SLAS	26524	26525	.	+	.	ID=LmxM.04.0060_SLAS_2;Promastigote=119;Intracellular_Amastigote=22;Axenic_Amastigote=174;
LmxM.04	MF_V1	SLAS	26581	26582	.	+	.	ID=LmxM.04.0060_SLAS_3;Promastigote=13;Intracellular_Amastigote=17;Axenic_Amastigote=23;
LmxM.04	MF_V1	SLAS	28427	28428	.	+	.	ID=LmxM.04.0070_SLAS_1;Promastigote=12;Intracellular_Amastigote=10;Axenic_Amastigote=17;
LmxM.04	MF_V1	SLAS	29922	29923	.	+	.	ID=LmxM.04.0080_SLAS_1;Promastigote=68;Intracellular_Amastigote=182;Axenic_Amastigote=198;
LmxM.04	MF_V1	SLAS	30758	30759	.	+	.	ID=LmxM.04.0090_SLAS_1;Promastigote=71;Intracellular_Amastigote=21;Axenic_Amastigote=43;
LmxM.04	MF_V1	SLAS	30778	30779	.	+	.	ID=LmxM.04.0090_SLAS_2;Promastigote=9;Intracellular_Amastigote=5;Axenic_Amastigote=7;
LmxM.04	MF_V1	SLAS	30792	30793	.	+	.	ID=LmxM.04.0090_SLAS_3;Promastigote=5;Intracellular_Amastigote=0;Axenic_Amastigote=4;
LmxM.04	MF_V1	SLAS	38195	38196	.	+	.	ID=LmxM.04.0100_SLAS_1;Promastigote=97;Intracellular_Amastigote=65;Axenic_Amastigote=113;
LmxM.04	MF_V1	SLAS	40291	40292	.	+	.	ID=LmxM.04.0110_SLAS_1;Promastigote=22;Intracellular_Amastigote=5;Axenic_Amastigote=6;
LmxM.04	MF_V1	SLAS	40960	40961	.	+	.	ID=LmxM.04.0110_SLAS_2;Promastigote=39;Intracellular_Amastigote=38;Axenic_Amastigote=69;
LmxM.04	MF_V1	SLAS	41013	41014	.	+	.	ID=LmxM.04.0110_SLAS_3;Promastigote=3;Intracellular_Amastigote=14;Axenic_Amastigote=16;
LmxM.04	MF_V1	SLAS	42890	42891	.	+	.	ID=LmxM.04.0120_SLAS_1;Promastigote=6;Intracellular_Amastigote=2;Axenic_Amastigote=4;
LmxM.04	MF_V1	SLAS	42918	42919	.	+	.	ID=LmxM.04.0120_SLAS_2;Promastigote=37;Intracellular_Amastigote=49;Axenic_Amastigote=37;
LmxM.04	MF_V1	SLAS	44550	44551	.	+	.	ID=LmxM.04.0123_SLAS_1;Promastigote=61;Intracellular_Amastigote=19;Axenic_Amastigote=51;
LmxM.04	MF_V1	SLAS	44633	44634	.	+	.	ID=LmxM.04.0123_SLAS_2;Promastigote=833;Intracellular_Amastigote=242;Axenic_Amastigote=768;
LmxM.04	MF_V1	SLAS	44692	44693	.	+	.	ID=LmxM.04.0123_SLAS_3;Promastigote=10;Intracellular_Amastigote=0;Axenic_Amastigote=21;
LmxM.04	MF_V1	SLAS	44821	44822	.	+	.	ID=LmxM.04.0123_SLAS_4;Promastigote=15;Intracellular_Amastigote=4;Axenic_Amastigote=21;
LmxM.04	MF_V1	SLAS	50535	50536	.	+	.	ID=LmxM.04_50854_SLAS_1;Promastigote=146;Intracellular_Amastigote=207;Axenic_Amastigote=246;
LmxM.04	MF_V1	SLAS	50540	50541	.	+	.	ID=LmxM.04_50854_SLAS_2;Promastigote=42;Intracellular_Amastigote=83;Axenic_Amastigote=129;
LmxM.04	MF_V1	SLAS	50552	50553	.	+	.	ID=LmxM.04_50854_SLAS_3;Promastigote=7;Intracellular_Amastigote=2;Axenic_Amastigote=12;
LmxM.04	MF_V1	SLAS	51728	51729	.	+	.	ID=LmxM.04.0180_SLAS_1;Promastigote=443;Intracellular_Amastigote=76;Axenic_Amastigote=656;
LmxM.04	MF_V1	SLAS	54194	54195	.	+	.	ID=LmxM.04.0190_SLAS_1;Promastigote=453;Intracellular_Amastigote=89;Axenic_Amastigote=598;
LmxM.04	MF_V1	SLAS	57368	57369	.	+	.	ID=LmxM.04.0200_SLAS_1;Promastigote=133;Intracellular_Amastigote=9;Axenic_Amastigote=50;
LmxM.04	MF_V1	SLAS	57416	57417	.	+	.	ID=LmxM.04.0200_SLAS_2;Promastigote=6;Intracellular_Amastigote=1;Axenic_Amastigote=5;
LmxM.04	MF_V1	SLAS	57512	57513	.	+	.	ID=LmxM.04.0200_SLAS_3;Promastigote=53;Intracellular_Amastigote=5;Axenic_Amastigote=38;
LmxM.04	MF_V1	SLAS	59539	59540	.	+	.	ID=LmxM.04.0210_SLAS_1;Promastigote=311;Intracellular_Amastigote=39;Axenic_Amastigote=199;
LmxM.04	MF_V1	SLAS	59608	59609	.	+	.	ID=LmxM.04.0210_SLAS_2;Promastigote=4;Intracellular_Amastigote=6;Axenic_Amastigote=8;
LmxM.04	MF_V1	SLAS	62529	62530	.	+	.	ID=LmxM.04.0220_SLAS_1;Promastigote=614;Intracellular_Amastigote=159;Axenic_Amastigote=866;
LmxM.04	MF_V1	SLAS	62531	62532	.	+	.	ID=LmxM.04.0220_SLAS_2;Promastigote=16;Intracellular_Amastigote=0;Axenic_Amastigote=11;
LmxM.04	MF_V1	SLAS	65505	65506	.	+	.	ID=LmxM.04.0230_SLAS_1;Promastigote=49;Intracellular_Amastigote=51;Axenic_Amastigote=82;
LmxM.04	MF_V1	SLAS	65598	65599	.	+	.	ID=LmxM.04.0230_SLAS_2;Promastigote=0;Intracellular_Amastigote=4;Axenic_Amastigote=8;
LmxM.04	MF_V1	SLAS	67315	67316	.	+	.	ID=LmxM.04.0240_SLAS_1;Promastigote=11;Intracellular_Amastigote=2;Axenic_Amastigote=11;
LmxM.04	MF_V1	SLAS	67483	67484	.	+	.	ID=LmxM.04.0240_SLAS_2;Promastigote=1101;Intracellular_Amastigote=347;Axenic_Amastigote=1531;
LmxM.04	MF_V1	SLAS	67487	67488	.	+	.	ID=LmxM.04.0240_SLAS_3;Promastigote=42;Intracellular_Amastigote=6;Axenic_Amastigote=50;
LmxM.04	MF_V1	SLAS	67582	67583	.	+	.	ID=LmxM.04.0240_SLAS_4;Promastigote=14;Intracellular_Amastigote=7;Axenic_Amastigote=15;
LmxM.04	MF_V1	SLAS	68988	68989	.	+	.	ID=LmxM.04.0250_SLAS_1;Promastigote=6;Intracellular_Amastigote=3;Axenic_Amastigote=15;
LmxM.04	MF_V1	SLAS	70537	70538	.	+	.	ID=LmxM.04.0250_SLAS_2;Promastigote=5;Intracellular_Amastigote=3;Axenic_Amastigote=3;
LmxM.04	MF_V1	SLAS	70601	70602	.	+	.	ID=LmxM.04.0250_SLAS_3;Promastigote=8;Intracellular_Amastigote=18;Axenic_Amastigote=15;
LmxM.04	MF_V1	SLAS	75517	75518	.	+	.	ID=LmxM.04.0260_SLAS_1;Promastigote=205;Intracellular_Amastigote=196;Axenic_Amastigote=264;
LmxM.04	MF_V1	SLAS	76987	76988	.	+	.	ID=LmxM.04.0270_SLAS_1;Promastigote=77;Intracellular_Amastigote=44;Axenic_Amastigote=77;
LmxM.04	MF_V1	SLAS	79281	79282	.	+	.	ID=LmxM.04.0280_SLAS_1;Promastigote=10;Intracellular_Amastigote=6;Axenic_Amastigote=6;
LmxM.04	MF_V1	SLAS	79339	79340	.	+	.	ID=LmxM.04.0280_SLAS_2;Promastigote=13;Intracellular_Amastigote=1;Axenic_Amastigote=5;
LmxM.04	MF_V1	SLAS	86269	86270	.	+	.	ID=LmxM.04.0290_SLAS_1;Promastigote=347;Intracellular_Amastigote=54;Axenic_Amastigote=334;
LmxM.04	MF_V1	SLAS	86356	86357	.	+	.	ID=LmxM.04.0290_SLAS_2;Promastigote=98;Intracellular_Amastigote=40;Axenic_Amastigote=89;
LmxM.04	MF_V1	SLAS	86359	86360	.	+	.	ID=LmxM.04.0290_SLAS_3;Promastigote=12;Intracellular_Amastigote=13;Axenic_Amastigote=18;
LmxM.04	MF_V1	SLAS	90550	90551	.	+	.	ID=LmxM.04.0310_SLAS_1;Promastigote=24;Intracellular_Amastigote=3;Axenic_Amastigote=4;
LmxM.04	MF_V1	SLAS	90567	90568	.	+	.	ID=LmxM.04.0310_SLAS_2;Promastigote=58;Intracellular_Amastigote=13;Axenic_Amastigote=13;
LmxM.04	MF_V1	SLAS	94047	94048	.	+	.	ID=LmxM.04.0320_SLAS_1;Promastigote=6;Intracellular_Amastigote=5;Axenic_Amastigote=7;
LmxM.04	MF_V1	SLAS	94139	94140	.	+	.	ID=LmxM.04.0320_SLAS_2;Promastigote=15;Intracellular_Amastigote=27;Axenic_Amastigote=33;
LmxM.04	MF_V1	SLAS	96767	96768	.	+	.	ID=LmxM.04.0330_SLAS_1;Promastigote=242;Intracellular_Amastigote=182;Axenic_Amastigote=262;
LmxM.04	MF_V1	SLAS	96796	96797	.	+	.	ID=LmxM.04.0330_SLAS_2;Promastigote=40;Intracellular_Amastigote=13;Axenic_Amastigote=53;
LmxM.04	MF_V1	SLAS	99918	99919	.	+	.	ID=LmxM.04.0340_SLAS_1;Promastigote=97;Intracellular_Amastigote=143;Axenic_Amastigote=181;
LmxM.04	MF_V1	SLAS	99921	99922	.	+	.	ID=LmxM.04.0340_SLAS_2;Promastigote=5;Intracellular_Amastigote=8;Axenic_Amastigote=21;
LmxM.04	MF_V1	SLAS	101343	101344	.	+	.	ID=LmxM.04.0350_SLAS_1;Promastigote=4;Intracellular_Amastigote=0;Axenic_Amastigote=14;
LmxM.04	MF_V1	SLAS	109451	109452	.	+	.	ID=LmxM.04.0370_SLAS_1;Promastigote=19;Intracellular_Amastigote=13;Axenic_Amastigote=14;
LmxM.04	MF_V1	SLAS	110857	110858	.	+	.	ID=LmxM.04.0380_SLAS_1;Promastigote=2;Intracellular_Amastigote=16;Axenic_Amastigote=4;
LmxM.04	MF_V1	SLAS	121576	121577	.	-	.	ID=LmxM.04.0390_SLAS_2;Promastigote=11;Intracellular_Amastigote=14;Axenic_Amastigote=9;
LmxM.04	MF_V1	SLAS	121579	121580	.	-	.	ID=LmxM.04.0390_SLAS_1;Promastigote=60;Intracellular_Amastigote=46;Axenic_Amastigote=46;
LmxM.04	MF_V1	SLAS	123286	123287	.	-	.	ID=LmxM.04_123059_SLAS_1;Promastigote=5;Intracellular_Amastigote=0;Axenic_Amastigote=4;
LmxM.04	MF_V1	SLAS	125047	125048	.	-	.	ID=LmxM.04.0400_SLAS_6;Promastigote=6;Intracellular_Amastigote=4;Axenic_Amastigote=15;
LmxM.04	MF_V1	SLAS	125075	125076	.	-	.	ID=LmxM.04.0400_SLAS_5;Promastigote=5;Intracellular_Amastigote=1;Axenic_Amastigote=7;
LmxM.04	MF_V1	SLAS	125078	125079	.	-	.	ID=LmxM.04.0400_SLAS_4;Promastigote=26;Intracellular_Amastigote=15;Axenic_Amastigote=54;
LmxM.04	MF_V1	SLAS	125089	125090	.	-	.	ID=LmxM.04.0400_SLAS_3;Promastigote=25;Intracellular_Amastigote=27;Axenic_Amastigote=59;
LmxM.04	MF_V1	SLAS	125126	125127	.	-	.	ID=LmxM.04.0400_SLAS_2;Promastigote=1;Intracellular_Amastigote=0;Axenic_Amastigote=8;
LmxM.04	MF_V1	SLAS	125138	125139	.	-	.	ID=LmxM.04.0400_SLAS_1;Promastigote=12;Intracellular_Amastigote=4;Axenic_Amastigote=8;
LmxM.04	MF_V1	SLAS	130746	130747	.	-	.	ID=LmxM.04.0410_SLAS_1;Promastigote=81;Intracellular_Amastigote=49;Axenic_Amastigote=130;
LmxM.04	MF_V1	SLAS	133417	133418	.	-	.	ID=LmxM.04.0420_SLAS_2;Promastigote=7;Intracellular_Amastigote=0;Axenic_Amastigote=3;
LmxM.04	MF_V1	SLAS	133421	133422	.	-	.	ID=LmxM.04.0420_SLAS_1;Promastigote=155;Intracellular_Amastigote=31;Axenic_Amastigote=85;
LmxM.04	MF_V1	SLAS	147468	147469	.	-	.	ID=LmxM.04.0430_SLAS_3;Promastigote=82;Intracellular_Amastigote=4;Axenic_Amastigote=85;
LmxM.04	MF_V1	SLAS	147500	147501	.	-	.	ID=LmxM.04.0430_SLAS_2;Promastigote=49;Intracellular_Amastigote=4;Axenic_Amastigote=43;
LmxM.04	MF_V1	SLAS	147535	147536	.	-	.	ID=LmxM.04.0430_SLAS_1;Promastigote=9;Intracellular_Amastigote=0;Axenic_Amastigote=1;
LmxM.04	MF_V1	SLAS	154613	154614	.	-	.	ID=LmxM.04.0440_SLAS_2;Promastigote=11;Intracellular_Amastigote=12;Axenic_Amastigote=14;
LmxM.04	MF_V1	SLAS	156184	156185	.	-	.	ID=LmxM.04.0440_SLAS_1;Promastigote=0;Intracellular_Amastigote=2;Axenic_Amastigote=7;
LmxM.04	MF_V1	SLAS	162318	162319	.	-	.	ID=LmxM.04.0450_SLAS_1;Promastigote=38;Intracellular_Amastigote=23;Axenic_Amastigote=53;
LmxM.04	MF_V1	SLAS	165030	165031	.	-	.	ID=LmxM.04.0460_SLAS_2;Promastigote=17;Intracellular_Amastigote=4;Axenic_Amastigote=32;
LmxM.04	MF_V1	SLAS	165051	165052	.	-	.	ID=LmxM.04.0460_SLAS_1;Promastigote=206;Intracellular_Amastigote=112;Axenic_Amastigote=213;
LmxM.04	MF_V1	SLAS	168379	168380	.	-	.	ID=LmxM.04.0465_SLAS_2;Promastigote=48;Intracellular_Amastigote=66;Axenic_Amastigote=129;
LmxM.04	MF_V1	SLAS	168429	168430	.	-	.	ID=LmxM.04.0465_SLAS_1;Promastigote=9;Intracellular_Amastigote=14;Axenic_Amastigote=9;
LmxM.04	MF_V1	SLAS	170080	170081	.	-	.	ID=LmxM.04.0470_SLAS_4;Promastigote=2;Intracellular_Amastigote=1;Axenic_Amastigote=6;
LmxM.04	MF_V1	SLAS	170083	170084	.	-	.	ID=LmxM.04.0470_SLAS_3;Promastigote=10;Intracellular_Amastigote=30;Axenic_Amastigote=17;
LmxM.04	MF_V1	SLAS	170085	170086	.	-	.	ID=LmxM.04.0470_SLAS_2;Promastigote=208;Intracellular_Amastigote=495;Axenic_Amastigote=305;
LmxM.04	MF_V1	SLAS	170169	170170	.	-	.	ID=LmxM.04.0470_SLAS_1;Promastigote=13;Intracellular_Amastigote=1;Axenic_Amastigote=9;
LmxM.04	MF_V1	SLAS	172311	172312	.	-	.	ID=LmxM.04.0480_SLAS_3;Promastigote=14;Intracellular_Amastigote=3;Axenic_Amastigote=11;
LmxM.04	MF_V1	SLAS	172345	172346	.	-	.	ID=LmxM.04.0480_SLAS_2;Promastigote=6;Intracellular_Amastigote=17;Axenic_Amastigote=13;
LmxM.04	MF_V1	SLAS	172358	172359	.	-	.	ID=LmxM.04.0480_SLAS_1;Promastigote=9;Intracellular_Amastigote=23;Axenic_Amastigote=20;
LmxM.04	MF_V1	SLAS	174712	174713	.	-	.	ID=LmxM.04.0490_SLAS_2;Promastigote=14;Intracellular_Amastigote=12;Axenic_Amastigote=21;
LmxM.04	MF_V1	SLAS	174721	174722	.	-	.	ID=LmxM.04.0490_SLAS_1;Promastigote=490;Intracellular_Amastigote=203;Axenic_Amastigote=433;
LmxM.04	MF_V1	SLAS	186068	186069	.	-	.	ID=LmxM.04.0500_SLAS_3;Promastigote=3;Intracellular_Amastigote=1;Axenic_Amastigote=6;
LmxM.04	MF_V1	SLAS	186123	186124	.	-	.	ID=LmxM.04.0500_SLAS_2;Promastigote=37;Intracellular_Amastigote=13;Axenic_Amastigote=67;
LmxM.04	MF_V1	SLAS	186132	186133	.	-	.	ID=LmxM.04.0500_SLAS_1;Promastigote=115;Intracellular_Amastigote=23;Axenic_Amastigote=137;
LmxM.04	MF_V1	SLAS	192825	192826	.	-	.	ID=LmxM.04.0510_SLAS_3;Promastigote=5;Intracellular_Amastigote=19;Axenic_Amastigote=25;
LmxM.04	MF_V1	SLAS	192867	192868	.	-	.	ID=LmxM.04.0510_SLAS_2;Promastigote=324;Intracellular_Amastigote=173;Axenic_Amastigote=584;
LmxM.04	MF_V1	SLAS	192892	192893	.	-	.	ID=LmxM.04.0510_SLAS_1;Promastigote=14;Intracellular_Amastigote=26;Axenic_Amastigote=27;
LmxM.04	MF_V1	SLAS	197823	197824	.	-	.	ID=LmxM.04.0520_SLAS_3;Promastigote=10;Intracellular_Amastigote=3;Axenic_Amastigote=16;
LmxM.04	MF_V1	SLAS	197837	197838	.	-	.	ID=LmxM.04.0520_SLAS_2;Promastigote=232;Intracellular_Amastigote=34;Axenic_Amastigote=209;
LmxM.04	MF_V1	SLAS	197845	197846	.	-	.	ID=LmxM.04.0520_SLAS_1;Promastigote=62;Intracellular_Amastigote=12;Axenic_Amastigote=30;
LmxM.04	MF_V1	SLAS	199883	199884	.	-	.	ID=LmxM.04.0530_SLAS_3;Promastigote=10;Intracellular_Amastigote=9;Axenic_Amastigote=20;
LmxM.04	MF_V1	SLAS	199940	199941	.	-	.	ID=LmxM.04.0530_SLAS_2;Promastigote=24;Intracellular_Amastigote=12;Axenic_Amastigote=35;
LmxM.04	MF_V1	SLAS	199958	199959	.	-	.	ID=LmxM.04.0530_SLAS_1;Promastigote=8;Intracellular_Amastigote=7;Axenic_Amastigote=16;
LmxM.04	MF_V1	SLAS	201180	201181	.	-	.	ID=LmxM.04_201044_SLAS_2;Promastigote=12;Intracellular_Amastigote=16;Axenic_Amastigote=15;
LmxM.04	MF_V1	SLAS	201193	201194	.	-	.	ID=LmxM.04_201044_SLAS_1;Promastigote=16;Intracellular_Amastigote=4;Axenic_Amastigote=14;
LmxM.04	MF_V1	SLAS	203967	203968	.	-	.	ID=LmxM.04.0540_SLAS_2;Promastigote=6;Intracellular_Amastigote=3;Axenic_Amastigote=7;
LmxM.04	MF_V1	SLAS	204606	204607	.	-	.	ID=LmxM.04.0540_SLAS_1;Promastigote=964;Intracellular_Amastigote=618;Axenic_Amastigote=1193;
LmxM.04	MF_V1	SLAS	210213	210214	.	-	.	ID=LmxM.04.0550_SLAS_3;Promastigote=5;Intracellular_Amastigote=7;Axenic_Amastigote=13;
LmxM.04	MF_V1	SLAS	210216	210217	.	-	.	ID=LmxM.04.0550_SLAS_2;Promastigote=118;Intracellular_Amastigote=55;Axenic_Amastigote=86;
LmxM.04	MF_V1	SLAS	210255	210256	.	-	.	ID=LmxM.04.0550_SLAS_1;Promastigote=6;Intracellular_Amastigote=1;Axenic_Amastigote=6;
LmxM.04	MF_V1	SLAS	212614	212615	.	-	.	ID=LmxM.04_212255_SLAS_2;Promastigote=9;Intracellular_Amastigote=5;Axenic_Amastigote=1;
LmxM.04	MF_V1	SLAS	212877	212878	.	-	.	ID=LmxM.04_212255_SLAS_1;Promastigote=12;Intracellular_Amastigote=2;Axenic_Amastigote=3;
LmxM.04	MF_V1	SLAS	214515	214516	.	-	.	ID=LmxM.04.0560_SLAS_2;Promastigote=32;Intracellular_Amastigote=19;Axenic_Amastigote=57;
LmxM.04	MF_V1	SLAS	214698	214699	.	-	.	ID=LmxM.04.0560_SLAS_1;Promastigote=3;Intracellular_Amastigote=4;Axenic_Amastigote=4;
LmxM.04	MF_V1	SLAS	220317	220318	.	-	.	ID=LmxM.04.0570_SLAS_3;Promastigote=10;Intracellular_Amastigote=4;Axenic_Amastigote=9;
LmxM.04	MF_V1	SLAS	220326	220327	.	-	.	ID=LmxM.04.0570_SLAS_2;Promastigote=34;Intracellular_Amastigote=8;Axenic_Amastigote=49;
LmxM.04	MF_V1	SLAS	220631	220632	.	-	.	ID=LmxM.04.0570_SLAS_1;Promastigote=8;Intracellular_Amastigote=3;Axenic_Amastigote=17;
LmxM.04	MF_V1	SLAS	222595	222596	.	-	.	ID=LmxM.04.0580_SLAS_2;Promastigote=26;Intracellular_Amastigote=9;Axenic_Amastigote=37;
LmxM.04	MF_V1	SLAS	222623	222624	.	-	.	ID=LmxM.04.0580_SLAS_1;Promastigote=218;Intracellular_Amastigote=181;Axenic_Amastigote=219;
LmxM.04	MF_V1	SLAS	224848	224849	.	-	.	ID=LmxM.04.0590_SLAS_4;Promastigote=5;Intracellular_Amastigote=0;Axenic_Amastigote=9;
LmxM.04	MF_V1	SLAS	224877	224878	.	-	.	ID=LmxM.04.0590_SLAS_3;Promastigote=21;Intracellular_Amastigote=2;Axenic_Amastigote=18;
LmxM.04	MF_V1	SLAS	224918	224919	.	-	.	ID=LmxM.04.0590_SLAS_2;Promastigote=166;Intracellular_Amastigote=179;Axenic_Amastigote=171;
LmxM.04	MF_V1	SLAS	224961	224962	.	-	.	ID=LmxM.04.0590_SLAS_1;Promastigote=219;Intracellular_Amastigote=103;Axenic_Amastigote=242;
LmxM.04	MF_V1	SLAS	235142	235143	.	-	.	ID=LmxM.04.0600_SLAS_3;Promastigote=4;Intracellular_Amastigote=0;Axenic_Amastigote=6;
LmxM.04	MF_V1	SLAS	235503	235504	.	-	.	ID=LmxM.04.0600_SLAS_2;Promastigote=101;Intracellular_Amastigote=33;Axenic_Amastigote=147;
LmxM.04	MF_V1	SLAS	235516	235517	.	-	.	ID=LmxM.04.0600_SLAS_1;Promastigote=10;Intracellular_Amastigote=0;Axenic_Amastigote=3;
LmxM.04	MF_V1	SLAS	236608	236609	.	-	.	ID=LmxM.04.0610_SLAS_2;Promastigote=6;Intracellular_Amastigote=9;Axenic_Amastigote=7;
LmxM.04	MF_V1	SLAS	236653	236654	.	-	.	ID=LmxM.04.0610_SLAS_1;Promastigote=13;Intracellular_Amastigote=6;Axenic_Amastigote=26;
LmxM.04	MF_V1	SLAS	241611	241612	.	-	.	ID=LmxM.04.0620_SLAS_2;Promastigote=4;Intracellular_Amastigote=3;Axenic_Amastigote=18;
LmxM.04	MF_V1	SLAS	241748	241749	.	-	.	ID=LmxM.04.0620_SLAS_1;Promastigote=31;Intracellular_Amastigote=7;Axenic_Amastigote=22;
LmxM.04	MF_V1	SLAS	243597	243598	.	-	.	ID=LmxM.04_243246_SLAS_1;Promastigote=98;Intracellular_Amastigote=29;Axenic_Amastigote=145;
LmxM.04	MF_V1	SLAS	245284	245285	.	-	.	ID=LmxM.04.0625_SLAS_2;Promastigote=14;Intracellular_Amastigote=5;Axenic_Amastigote=7;
LmxM.04	MF_V1	SLAS	245346	245347	.	-	.	ID=LmxM.04.0625_SLAS_1;Promastigote=71;Intracellular_Amastigote=7;Axenic_Amastigote=21;
LmxM.04	MF_V1	SLAS	246589	246590	.	-	.	ID=LmxM.04.0630_SLAS_3;Promastigote=4;Intracellular_Amastigote=4;Axenic_Amastigote=6;
LmxM.04	MF_V1	SLAS	246627	246628	.	-	.	ID=LmxM.04.0630_SLAS_2;Promastigote=28;Intracellular_Amastigote=19;Axenic_Amastigote=45;
LmxM.04	MF_V1	SLAS	246645	246646	.	-	.	ID=LmxM.04.0630_SLAS_1;Promastigote=1705;Intracellular_Amastigote=885;Axenic_Amastigote=1634;
LmxM.04	MF_V1	SLAS	247496	247497	.	-	.	ID=LmxM.04_246981_SLAS_1;Promastigote=5;Intracellular_Amastigote=1;Axenic_Amastigote=4;
LmxM.04	MF_V1	SLAS	249663	249664	.	-	.	ID=LmxM.04.0640_SLAS_3;Promastigote=22;Intracellular_Amastigote=11;Axenic_Amastigote=53;
LmxM.04	MF_V1	SLAS	249944	249945	.	-	.	ID=LmxM.04.0640_SLAS_2;Promastigote=31;Intracellular_Amastigote=9;Axenic_Amastigote=26;
LmxM.04	MF_V1	SLAS	250039	250040	.	-	.	ID=LmxM.04.0640_SLAS_1;Promastigote=60;Intracellular_Amastigote=89;Axenic_Amastigote=96;
LmxM.04	MF_V1	SLAS	254512	254513	.	-	.	ID=LmxM.04.0650_SLAS_2;Promastigote=5;Intracellular_Amastigote=4;Axenic_Amastigote=9;
LmxM.04	MF_V1	SLAS	254540	254541	.	-	.	ID=LmxM.04.0650_SLAS_1;Promastigote=247;Intracellular_Amastigote=54;Axenic_Amastigote=301;
LmxM.04	MF_V1	SLAS	256102	256103	.	-	.	ID=LmxM.04.0660_SLAS_1;Promastigote=38;Intracellular_Amastigote=18;Axenic_Amastigote=91;
LmxM.04	MF_V1	SLAS	257818	257819	.	-	.	ID=LmxM.04.0670_SLAS_7;Promastigote=6;Intracellular_Amastigote=5;Axenic_Amastigote=17;
LmxM.04	MF_V1	SLAS	257835	257836	.	-	.	ID=LmxM.04.0670_SLAS_6;Promastigote=119;Intracellular_Amastigote=87;Axenic_Amastigote=165;
LmxM.04	MF_V1	SLAS	257867	257868	.	-	.	ID=LmxM.04.0670_SLAS_5;Promastigote=3088;Intracellular_Amastigote=437;Axenic_Amastigote=2898;
LmxM.04	MF_V1	SLAS	257880	257881	.	-	.	ID=LmxM.04.0670_SLAS_4;Promastigote=248;Intracellular_Amastigote=44;Axenic_Amastigote=191;
LmxM.04	MF_V1	SLAS	257923	257924	.	-	.	ID=LmxM.04.0670_SLAS_3;Promastigote=15;Intracellular_Amastigote=5;Axenic_Amastigote=12;
LmxM.04	MF_V1	SLAS	257944	257945	.	-	.	ID=LmxM.04.0670_SLAS_2;Promastigote=7;Intracellular_Amastigote=4;Axenic_Amastigote=9;
LmxM.04	MF_V1	SLAS	258053	258054	.	-	.	ID=LmxM.04.0670_SLAS_1;Promastigote=12;Intracellular_Amastigote=6;Axenic_Amastigote=9;
LmxM.04	MF_V1	SLAS	260077	260078	.	-	.	ID=LmxM.04.0680_SLAS_3;Promastigote=63;Intracellular_Amastigote=16;Axenic_Amastigote=57;
LmxM.04	MF_V1	SLAS	260094	260095	.	-	.	ID=LmxM.04.0680_SLAS_2;Promastigote=9;Intracellular_Amastigote=2;Axenic_Amastigote=4;
LmxM.04	MF_V1	SLAS	260097	260098	.	-	.	ID=LmxM.04.0680_SLAS_1;Promastigote=3477;Intracellular_Amastigote=856;Axenic_Amastigote=2001;
LmxM.04	MF_V1	SLAS	263897	263898	.	-	.	ID=LmxM.04.0690_SLAS_1;Promastigote=5;Intracellular_Amastigote=1;Axenic_Amastigote=3;
LmxM.04	MF_V1	SLAS	268020	268021	.	-	.	ID=LmxM.04.0700_SLAS_1;Promastigote=172;Intracellular_Amastigote=67;Axenic_Amastigote=323;
LmxM.04	MF_V1	SLAS	271885	271886	.	-	.	ID=LmxM.04.0710_SLAS_3;Promastigote=7;Intracellular_Amastigote=1;Axenic_Amastigote=9;
LmxM.04	MF_V1	SLAS	271925	271926	.	-	.	ID=LmxM.04.0710_SLAS_2;Promastigote=63;Intracellular_Amastigote=14;Axenic_Amastigote=67;
LmxM.04	MF_V1	SLAS	271993	271994	.	-	.	ID=LmxM.04.0710_SLAS_1;Promastigote=14;Intracellular_Amastigote=5;Axenic_Amastigote=28;
LmxM.04	MF_V1	SLAS	276349	276350	.	-	.	ID=LmxM.04.0720_SLAS_2;Promastigote=90;Intracellular_Amastigote=17;Axenic_Amastigote=50;
LmxM.04	MF_V1	SLAS	276358	276359	.	-	.	ID=LmxM.04.0720_SLAS_1;Promastigote=87;Intracellular_Amastigote=29;Axenic_Amastigote=38;
LmxM.04	MF_V1	SLAS	279063	279064	.	-	.	ID=LmxM.04.0730_SLAS_1;Promastigote=8;Intracellular_Amastigote=0;Axenic_Amastigote=6;
LmxM.04	MF_V1	SLAS	282375	282376	.	-	.	ID=LmxM.04.0740_SLAS_2;Promastigote=3;Intracellular_Amastigote=4;Axenic_Amastigote=4;
LmxM.04	MF_V1	SLAS	282416	282417	.	-	.	ID=LmxM.04.0740_SLAS_1;Promastigote=280;Intracellular_Amastigote=84;Axenic_Amastigote=384;
LmxM.04	MF_V1	SLAS	283618	283619	.	-	.	ID=LmxM.04.0750_SLAS_4;Promastigote=2;Intracellular_Amastigote=3;Axenic_Amastigote=4;
LmxM.04	MF_V1	SLAS	283635	283636	.	-	.	ID=LmxM.04.0750_SLAS_3;Promastigote=9;Intracellular_Amastigote=5;Axenic_Amastigote=11;
LmxM.04	MF_V1	SLAS	283637	283638	.	-	.	ID=LmxM.04.0750_SLAS_2;Promastigote=16;Intracellular_Amastigote=7;Axenic_Amastigote=16;
LmxM.04	MF_V1	SLAS	283639	283640	.	-	.	ID=LmxM.04.0750_SLAS_1;Promastigote=382;Intracellular_Amastigote=250;Axenic_Amastigote=636;
LmxM.04	MF_V1	SLAS	285257	285258	.	-	.	ID=LmxM.04.0760_SLAS_5;Promastigote=153;Intracellular_Amastigote=142;Axenic_Amastigote=320;
LmxM.04	MF_V1	SLAS	285291	285292	.	-	.	ID=LmxM.04.0760_SLAS_4;Promastigote=1382;Intracellular_Amastigote=673;Axenic_Amastigote=2089;
LmxM.04	MF_V1	SLAS	285329	285330	.	-	.	ID=LmxM.04.0760_SLAS_3;Promastigote=4;Intracellular_Amastigote=4;Axenic_Amastigote=2;
LmxM.04	MF_V1	SLAS	285343	285344	.	-	.	ID=LmxM.04.0760_SLAS_2;Promastigote=6;Intracellular_Amastigote=3;Axenic_Amastigote=4;
LmxM.04	MF_V1	SLAS	286002	286003	.	-	.	ID=LmxM.04.0760_SLAS_1;Promastigote=6;Intracellular_Amastigote=3;Axenic_Amastigote=3;
LmxM.04	MF_V1	SLAS	287231	287232	.	-	.	ID=LmxM.04.0770_SLAS_1;Promastigote=423;Intracellular_Amastigote=357;Axenic_Amastigote=587;
LmxM.04	MF_V1	SLAS	289864	289865	.	-	.	ID=LmxM.04.0780_SLAS_4;Promastigote=3;Intracellular_Amastigote=0;Axenic_Amastigote=11;
LmxM.04	MF_V1	SLAS	289868	289869	.	-	.	ID=LmxM.04.0780_SLAS_3;Promastigote=14;Intracellular_Amastigote=3;Axenic_Amastigote=39;
LmxM.04	MF_V1	SLAS	289872	289873	.	-	.	ID=LmxM.04.0780_SLAS_2;Promastigote=101;Intracellular_Amastigote=37;Axenic_Amastigote=203;
LmxM.04	MF_V1	SLAS	289966	289967	.	-	.	ID=LmxM.04.0780_SLAS_1;Promastigote=3374;Intracellular_Amastigote=405;Axenic_Amastigote=3531;
LmxM.04	MF_V1	SLAS	294731	294732	.	-	.	ID=LmxM.04.0790_SLAS_4;Promastigote=18;Intracellular_Amastigote=3;Axenic_Amastigote=13;
LmxM.04	MF_V1	SLAS	294755	294756	.	-	.	ID=LmxM.04.0790_SLAS_3;Promastigote=47;Intracellular_Amastigote=21;Axenic_Amastigote=68;
LmxM.04	MF_V1	SLAS	294833	294834	.	-	.	ID=LmxM.04.0790_SLAS_2;Promastigote=4;Intracellular_Amastigote=3;Axenic_Amastigote=4;
LmxM.04	MF_V1	SLAS	295004	295005	.	-	.	ID=LmxM.04.0790_SLAS_1;Promastigote=10;Intracellular_Amastigote=3;Axenic_Amastigote=5;
LmxM.04	MF_V1	SLAS	296657	296658	.	-	.	ID=LmxM.04.0800_SLAS_3;Promastigote=14;Intracellular_Amastigote=16;Axenic_Amastigote=31;
LmxM.04	MF_V1	SLAS	296723	296724	.	-	.	ID=LmxM.04.0800_SLAS_2;Promastigote=479;Intracellular_Amastigote=343;Axenic_Amastigote=595;
LmxM.04	MF_V1	SLAS	296866	296867	.	-	.	ID=LmxM.04.0800_SLAS_1;Promastigote=5;Intracellular_Amastigote=3;Axenic_Amastigote=2;
LmxM.04	MF_V1	SLAS	299792	299793	.	-	.	ID=LmxM.04.0810_SLAS_2;Promastigote=16;Intracellular_Amastigote=12;Axenic_Amastigote=14;
LmxM.04	MF_V1	SLAS	299795	299796	.	-	.	ID=LmxM.04.0810_SLAS_1;Promastigote=24;Intracellular_Amastigote=20;Axenic_Amastigote=32;
LmxM.04	MF_V1	SLAS	301793	301794	.	-	.	ID=LmxM.04.0820_SLAS_1;Promastigote=241;Intracellular_Amastigote=170;Axenic_Amastigote=452;
LmxM.04	MF_V1	SLAS	307395	307396	.	-	.	ID=LmxM.04.0830_SLAS_2;Promastigote=6;Intracellular_Amastigote=0;Axenic_Amastigote=7;
LmxM.04	MF_V1	SLAS	307410	307411	.	-	.	ID=LmxM.04.0830_SLAS_1;Promastigote=460;Intracellular_Amastigote=53;Axenic_Amastigote=463;
LmxM.04	MF_V1	SLAS	310647	310648	.	-	.	ID=LmxM.04.0840_SLAS_4;Promastigote=3;Intracellular_Amastigote=3;Axenic_Amastigote=7;
LmxM.04	MF_V1	SLAS	310665	310666	.	-	.	ID=LmxM.04.0840_SLAS_3;Promastigote=41;Intracellular_Amastigote=62;Axenic_Amastigote=98;
LmxM.04	MF_V1	SLAS	310675	310676	.	-	.	ID=LmxM.04.0840_SLAS_2;Promastigote=32;Intracellular_Amastigote=11;Axenic_Amastigote=55;
LmxM.04	MF_V1	SLAS	310963	310964	.	-	.	ID=LmxM.04.0840_SLAS_1;Promastigote=2;Intracellular_Amastigote=7;Axenic_Amastigote=3;
LmxM.04	MF_V1	SLAS	313390	313391	.	-	.	ID=LmxM.04.0850_SLAS_1;Promastigote=160;Intracellular_Amastigote=56;Axenic_Amastigote=69;
LmxM.04	MF_V1	SLAS	314580	314581	.	-	.	ID=LmxM.04.0860_SLAS_2;Promastigote=16;Intracellular_Amastigote=20;Axenic_Amastigote=24;
LmxM.04	MF_V1	SLAS	314587	314588	.	-	.	ID=LmxM.04.0860_SLAS_1;Promastigote=204;Intracellular_Amastigote=293;Axenic_Amastigote=304;
LmxM.04	MF_V1	SLAS	321371	321372	.	-	.	ID=LmxM.04.0870_SLAS_1;Promastigote=4;Intracellular_Amastigote=0;Axenic_Amastigote=7;
LmxM.04	MF_V1	SLAS	328602	328603	.	-	.	ID=LmxM.04.0890_SLAS_4;Promastigote=26;Intracellular_Amastigote=26;Axenic_Amastigote=64;
LmxM.04	MF_V1	SLAS	328686	328687	.	-	.	ID=LmxM.04.0890_SLAS_3;Promastigote=5;Intracellular_Amastigote=3;Axenic_Amastigote=8;
LmxM.04	MF_V1	SLAS	329041	329042	.	-	.	ID=LmxM.04.0890_SLAS_2;Promastigote=6;Intracellular_Amastigote=12;Axenic_Amastigote=20;
LmxM.04	MF_V1	SLAS	329051	329052	.	-	.	ID=LmxM.04.0890_SLAS_1;Promastigote=4;Intracellular_Amastigote=1;Axenic_Amastigote=5;
LmxM.04	MF_V1	SLAS	330352	330353	.	-	.	ID=LmxM.04.0910_SLAS_2;Promastigote=4;Intracellular_Amastigote=3;Axenic_Amastigote=10;
LmxM.04	MF_V1	SLAS	330477	330478	.	-	.	ID=LmxM.04.0910_SLAS_1;Promastigote=20;Intracellular_Amastigote=8;Axenic_Amastigote=31;
LmxM.04	MF_V1	SLAS	334932	334933	.	-	.	ID=LmxM.04.0920_SLAS_2;Promastigote=4;Intracellular_Amastigote=4;Axenic_Amastigote=6;
LmxM.04	MF_V1	SLAS	335007	335008	.	-	.	ID=LmxM.04.0920_SLAS_1;Promastigote=75;Intracellular_Amastigote=26;Axenic_Amastigote=158;
LmxM.04	MF_V1	SLAS	336826	336827	.	-	.	ID=LmxM.04.0930_SLAS_2;Promastigote=2;Intracellular_Amastigote=2;Axenic_Amastigote=6;
LmxM.04	MF_V1	SLAS	336850	336851	.	-	.	ID=LmxM.04.0930_SLAS_1;Promastigote=208;Intracellular_Amastigote=57;Axenic_Amastigote=252;
LmxM.04	MF_V1	SLAS	340099	340100	.	-	.	ID=LmxM.04.0940_SLAS_2;Promastigote=58;Intracellular_Amastigote=6;Axenic_Amastigote=36;
LmxM.04	MF_V1	SLAS	340104	340105	.	-	.	ID=LmxM.04.0940_SLAS_1;Promastigote=1068;Intracellular_Amastigote=58;Axenic_Amastigote=470;
LmxM.04	MF_V1	SLAS	341569	341570	.	-	.	ID=LmxM.04.0950_SLAS_6;Promastigote=5;Intracellular_Amastigote=1;Axenic_Amastigote=6;
LmxM.04	MF_V1	SLAS	341624	341625	.	-	.	ID=LmxM.04.0950_SLAS_5;Promastigote=51;Intracellular_Amastigote=45;Axenic_Amastigote=71;
LmxM.04	MF_V1	SLAS	341628	341629	.	-	.	ID=LmxM.04.0950_SLAS_4;Promastigote=40;Intracellular_Amastigote=59;Axenic_Amastigote=79;
LmxM.04	MF_V1	SLAS	341632	341633	.	-	.	ID=LmxM.04.0950_SLAS_3;Promastigote=772;Intracellular_Amastigote=867;Axenic_Amastigote=957;
LmxM.04	MF_V1	SLAS	341833	341834	.	-	.	ID=LmxM.04.0950_SLAS_2;Promastigote=18;Intracellular_Amastigote=6;Axenic_Amastigote=13;
LmxM.04	MF_V1	SLAS	341869	341870	.	-	.	ID=LmxM.04.0950_SLAS_1;Promastigote=50;Intracellular_Amastigote=29;Axenic_Amastigote=50;
LmxM.04	MF_V1	SLAS	343066	343067	.	-	.	ID=LmxM.04.0960_SLAS_2;Promastigote=3;Intracellular_Amastigote=5;Axenic_Amastigote=4;
LmxM.04	MF_V1	SLAS	343134	343135	.	-	.	ID=LmxM.04.0960_SLAS_1;Promastigote=155;Intracellular_Amastigote=149;Axenic_Amastigote=131;
LmxM.04	MF_V1	SLAS	345360	345361	.	-	.	ID=LmxM.04.0970_SLAS_2;Promastigote=1;Intracellular_Amastigote=1;Axenic_Amastigote=7;
LmxM.04	MF_V1	SLAS	345375	345376	.	-	.	ID=LmxM.04.0970_SLAS_1;Promastigote=53;Intracellular_Amastigote=23;Axenic_Amastigote=94;
LmxM.04	MF_V1	SLAS	347366	347367	.	-	.	ID=LmxM.04.0975_SLAS_2;Promastigote=100;Intracellular_Amastigote=35;Axenic_Amastigote=159;
LmxM.04	MF_V1	SLAS	347421	347422	.	-	.	ID=LmxM.04.0975_SLAS_1;Promastigote=29;Intracellular_Amastigote=22;Axenic_Amastigote=30;
LmxM.04	MF_V1	SLAS	351600	351601	.	-	.	ID=LmxM.04.0980_SLAS_2;Promastigote=8;Intracellular_Amastigote=0;Axenic_Amastigote=11;
LmxM.04	MF_V1	SLAS	351630	351631	.	-	.	ID=LmxM.04.0980_SLAS_1;Promastigote=479;Intracellular_Amastigote=243;Axenic_Amastigote=512;
LmxM.04	MF_V1	SLAS	353227	353228	.	-	.	ID=LmxM.04.0990_SLAS_2;Promastigote=4;Intracellular_Amastigote=21;Axenic_Amastigote=13;
LmxM.04	MF_V1	SLAS	353256	353257	.	-	.	ID=LmxM.04.0990_SLAS_1;Promastigote=629;Intracellular_Amastigote=87;Axenic_Amastigote=681;
LmxM.04	MF_V1	SLAS	357828	357829	.	-	.	ID=LmxM.04.1000_SLAS_1;Promastigote=35;Intracellular_Amastigote=26;Axenic_Amastigote=49;
LmxM.04	MF_V1	SLAS	359641	359642	.	-	.	ID=LmxM.04.1010_SLAS_1;Promastigote=42;Intracellular_Amastigote=18;Axenic_Amastigote=60;
LmxM.04	MF_V1	SLAS	361677	361678	.	-	.	ID=LmxM.04.1030_SLAS_2;Promastigote=3;Intracellular_Amastigote=2;Axenic_Amastigote=6;
LmxM.04	MF_V1	SLAS	361772	361773	.	-	.	ID=LmxM.04.1030_SLAS_1;Promastigote=60;Intracellular_Amastigote=27;Axenic_Amastigote=60;
LmxM.04	MF_V1	SLAS	365137	365138	.	-	.	ID=LmxM.04.1040_SLAS_5;Promastigote=4;Intracellular_Amastigote=1;Axenic_Amastigote=4;
LmxM.04	MF_V1	SLAS	365165	365166	.	-	.	ID=LmxM.04.1040_SLAS_4;Promastigote=5;Intracellular_Amastigote=2;Axenic_Amastigote=6;
LmxM.04	MF_V1	SLAS	365308	365309	.	-	.	ID=LmxM.04.1040_SLAS_3;Promastigote=2;Intracellular_Amastigote=2;Axenic_Amastigote=9;
LmxM.04	MF_V1	SLAS	365340	365341	.	-	.	ID=LmxM.04.1040_SLAS_2;Promastigote=9;Intracellular_Amastigote=6;Axenic_Amastigote=23;
LmxM.04	MF_V1	SLAS	365349	365350	.	-	.	ID=LmxM.04.1040_SLAS_1;Promastigote=483;Intracellular_Amastigote=184;Axenic_Amastigote=743;
LmxM.04	MF_V1	SLAS	367160	367161	.	-	.	ID=LmxM.04.1050_SLAS_4;Promastigote=15;Intracellular_Amastigote=14;Axenic_Amastigote=13;
LmxM.04	MF_V1	SLAS	367446	367447	.	-	.	ID=LmxM.04.1050_SLAS_3;Promastigote=27;Intracellular_Amastigote=9;Axenic_Amastigote=15;
LmxM.04	MF_V1	SLAS	367474	367475	.	-	.	ID=LmxM.04.1050_SLAS_2;Promastigote=1331;Intracellular_Amastigote=222;Axenic_Amastigote=1169;
LmxM.04	MF_V1	SLAS	367478	367479	.	-	.	ID=LmxM.04.1050_SLAS_1;Promastigote=43;Intracellular_Amastigote=4;Axenic_Amastigote=29;
LmxM.04	MF_V1	SLAS	370143	370144	.	-	.	ID=LmxM.04.1060_SLAS_3;Promastigote=9;Intracellular_Amastigote=2;Axenic_Amastigote=9;
LmxM.04	MF_V1	SLAS	370150	370151	.	-	.	ID=LmxM.04.1060_SLAS_2;Promastigote=173;Intracellular_Amastigote=113;Axenic_Amastigote=231;
LmxM.04	MF_V1	SLAS	370153	370154	.	-	.	ID=LmxM.04.1060_SLAS_1;Promastigote=263;Intracellular_Amastigote=222;Axenic_Amastigote=336;
LmxM.04	MF_V1	SLAS	370857	370858	.	-	.	ID=LmxM.04.1070_SLAS_2;Promastigote=11;Intracellular_Amastigote=12;Axenic_Amastigote=7;
LmxM.04	MF_V1	SLAS	370860	370861	.	-	.	ID=LmxM.04.1070_SLAS_1;Promastigote=9;Intracellular_Amastigote=7;Axenic_Amastigote=6;
LmxM.04	MF_V1	SLAS	374509	374510	.	-	.	ID=LmxM.04.1080_SLAS_3;Promastigote=8;Intracellular_Amastigote=7;Axenic_Amastigote=21;
LmxM.04	MF_V1	SLAS	374517	374518	.	-	.	ID=LmxM.04.1080_SLAS_2;Promastigote=9;Intracellular_Amastigote=18;Axenic_Amastigote=42;
LmxM.04	MF_V1	SLAS	374526	374527	.	-	.	ID=LmxM.04.1080_SLAS_1;Promastigote=96;Intracellular_Amastigote=60;Axenic_Amastigote=203;
LmxM.04	MF_V1	SLAS	379791	379792	.	-	.	ID=LmxM.04.1090_SLAS_2;Promastigote=2;Intracellular_Amastigote=0;Axenic_Amastigote=9;
LmxM.04	MF_V1	SLAS	379803	379804	.	-	.	ID=LmxM.04.1090_SLAS_1;Promastigote=281;Intracellular_Amastigote=22;Axenic_Amastigote=182;
LmxM.04	MF_V1	SLAS	381439	381440	.	-	.	ID=LmxM.04.1100_SLAS_2;Promastigote=65;Intracellular_Amastigote=44;Axenic_Amastigote=173;
LmxM.04	MF_V1	SLAS	381447	381448	.	-	.	ID=LmxM.04.1100_SLAS_1;Promastigote=21;Intracellular_Amastigote=7;Axenic_Amastigote=28;
LmxM.04	MF_V1	SLAS	385168	385169	.	-	.	ID=LmxM.04.1110_SLAS_1;Promastigote=18;Intracellular_Amastigote=21;Axenic_Amastigote=58;
LmxM.04	MF_V1	SLAS	389233	389234	.	-	.	ID=LmxM.04.1120_SLAS_3;Promastigote=38;Intracellular_Amastigote=9;Axenic_Amastigote=38;
LmxM.04	MF_V1	SLAS	389254	389255	.	-	.	ID=LmxM.04.1120_SLAS_2;Promastigote=355;Intracellular_Amastigote=100;Axenic_Amastigote=286;
LmxM.04	MF_V1	SLAS	389448	389449	.	-	.	ID=LmxM.04.1120_SLAS_1;Promastigote=16;Intracellular_Amastigote=0;Axenic_Amastigote=7;
LmxM.04	MF_V1	SLAS	391089	391090	.	-	.	ID=LmxM.04.1130_SLAS_1;Promastigote=46;Intracellular_Amastigote=25;Axenic_Amastigote=70;
LmxM.04	MF_V1	SLAS	392745	392746	.	-	.	ID=LmxM.04.1140_SLAS_2;Promastigote=29;Intracellular_Amastigote=15;Axenic_Amastigote=49;
LmxM.04	MF_V1	SLAS	392757	392758	.	-	.	ID=LmxM.04.1140_SLAS_1;Promastigote=307;Intracellular_Amastigote=102;Axenic_Amastigote=269;
LmxM.04	MF_V1	SLAS	393673	393674	.	-	.	ID=LmxM.04.1150_SLAS_1;Promastigote=10;Intracellular_Amastigote=15;Axenic_Amastigote=20;
LmxM.04	MF_V1	SLAS	397204	397205	.	-	.	ID=LmxM.04.1160_SLAS_3;Promastigote=65;Intracellular_Amastigote=23;Axenic_Amastigote=27;
LmxM.04	MF_V1	SLAS	397295	397296	.	-	.	ID=LmxM.04.1160_SLAS_2;Promastigote=583;Intracellular_Amastigote=240;Axenic_Amastigote=619;
LmxM.04	MF_V1	SLAS	397375	397376	.	-	.	ID=LmxM.04.1160_SLAS_1;Promastigote=10;Intracellular_Amastigote=8;Axenic_Amastigote=13;
LmxM.04	MF_V1	SLAS	399854	399855	.	-	.	ID=LmxM.04.1165_SLAS_2;Promastigote=1;Intracellular_Amastigote=1;Axenic_Amastigote=7;
LmxM.04	MF_V1	SLAS	399874	399875	.	-	.	ID=LmxM.04.1165_SLAS_1;Promastigote=46;Intracellular_Amastigote=24;Axenic_Amastigote=86;
LmxM.04	MF_V1	SLAS	409216	409217	.	-	.	ID=LmxM.04.1170_SLAS_4;Promastigote=3;Intracellular_Amastigote=2;Axenic_Amastigote=9;
LmxM.04	MF_V1	SLAS	409277	409278	.	-	.	ID=LmxM.04.1170_SLAS_3;Promastigote=168;Intracellular_Amastigote=15;Axenic_Amastigote=107;
LmxM.04	MF_V1	SLAS	409283	409284	.	-	.	ID=LmxM.04.1170_SLAS_2;Promastigote=246;Intracellular_Amastigote=36;Axenic_Amastigote=88;
LmxM.04	MF_V1	SLAS	409286	409287	.	-	.	ID=LmxM.04.1170_SLAS_1;Promastigote=650;Intracellular_Amastigote=95;Axenic_Amastigote=315;
LmxM.04	MF_V1	SLAS	418654	418655	.	-	.	ID=LmxM.04.1180_SLAS_1;Promastigote=4;Intracellular_Amastigote=1;Axenic_Amastigote=8;
LmxM.04	MF_V1	SLAS	420783	420784	.	-	.	ID=LmxM.04.1190_SLAS_1;Promastigote=87;Intracellular_Amastigote=36;Axenic_Amastigote=122;
LmxM.04	MF_V1	SLAS	422139	422140	.	-	.	ID=LmxM.04.1200_SLAS_3;Promastigote=9;Intracellular_Amastigote=2;Axenic_Amastigote=6;
LmxM.04	MF_V1	SLAS	422169	422170	.	-	.	ID=LmxM.04.1200_SLAS_2;Promastigote=14;Intracellular_Amastigote=5;Axenic_Amastigote=10;
LmxM.04	MF_V1	SLAS	422235	422236	.	-	.	ID=LmxM.04.1200_SLAS_1;Promastigote=9;Intracellular_Amastigote=2;Axenic_Amastigote=13;
LmxM.04	MF_V1	SLAS	423406	423407	.	-	.	ID=LmxM.04_422972_SLAS_2;Promastigote=191;Intracellular_Amastigote=61;Axenic_Amastigote=276;
LmxM.04	MF_V1	SLAS	423437	423438	.	-	.	ID=LmxM.04_422972_SLAS_1;Promastigote=25;Intracellular_Amastigote=41;Axenic_Amastigote=41;
LmxM.04	MF_V1	SLAS	428265	428266	.	-	.	ID=LmxM.04.1210_SLAS_2;Promastigote=10;Intracellular_Amastigote=6;Axenic_Amastigote=9;
LmxM.04	MF_V1	SLAS	428270	428271	.	-	.	ID=LmxM.04.1210_SLAS_1;Promastigote=131;Intracellular_Amastigote=22;Axenic_Amastigote=147;
LmxM.04	MF_V1	SLAS	432258	432259	.	-	.	ID=LmxM.04.1220_SLAS_2;Promastigote=24;Intracellular_Amastigote=6;Axenic_Amastigote=36;
LmxM.04	MF_V1	SLAS	432288	432289	.	-	.	ID=LmxM.04.1220_SLAS_1;Promastigote=1;Intracellular_Amastigote=4;Axenic_Amastigote=13;
LmxM.04	MF_V1	SLAS	434435	434436	.	-	.	ID=LmxM.04.1230_SLAS_3;Promastigote=3;Intracellular_Amastigote=0;Axenic_Amastigote=8;
LmxM.04	MF_V1	SLAS	434468	434469	.	-	.	ID=LmxM.04.1230_SLAS_2;Promastigote=111;Intracellular_Amastigote=34;Axenic_Amastigote=137;
LmxM.04	MF_V1	SLAS	434476	434477	.	-	.	ID=LmxM.04.1230_SLAS_1;Promastigote=853;Intracellular_Amastigote=304;Axenic_Amastigote=829;
LmxM.05	MF_V1	SLAS	9269	9270	.	+	.	ID=LmxM.05.0020_SLAS_1;Promastigote=309;Intracellular_Amastigote=237;Axenic_Amastigote=555;
LmxM.05	MF_V1	SLAS	9272	9273	.	+	.	ID=LmxM.05.0020_SLAS_2;Promastigote=103;Intracellular_Amastigote=63;Axenic_Amastigote=185;
LmxM.05	MF_V1	SLAS	9283	9284	.	+	.	ID=LmxM.05.0020_SLAS_3;Promastigote=5;Intracellular_Amastigote=5;Axenic_Amastigote=14;
LmxM.05	MF_V1	SLAS	10173	10174	.	+	.	ID=LmxM.05.0030_SLAS_1;Promastigote=137;Intracellular_Amastigote=100;Axenic_Amastigote=141;
LmxM.05	MF_V1	SLAS	10213	10214	.	+	.	ID=LmxM.05.0030_SLAS_2;Promastigote=22;Intracellular_Amastigote=4;Axenic_Amastigote=10;
LmxM.05	MF_V1	SLAS	11818	11819	.	+	.	ID=LmxM.05.0040_SLAS_1;Promastigote=125;Intracellular_Amastigote=15;Axenic_Amastigote=112;
LmxM.05	MF_V1	SLAS	14644	14645	.	+	.	ID=LmxM.05.0050_SLAS_1;Promastigote=498;Intracellular_Amastigote=48;Axenic_Amastigote=384;
LmxM.05	MF_V1	SLAS	18216	18217	.	+	.	ID=LmxM.05.0060_SLAS_1;Promastigote=52;Intracellular_Amastigote=77;Axenic_Amastigote=111;
LmxM.05	MF_V1	SLAS	18592	18593	.	+	.	ID=LmxM.05.0060_SLAS_2;Promastigote=8;Intracellular_Amastigote=2;Axenic_Amastigote=5;
LmxM.05	MF_V1	SLAS	22778	22779	.	+	.	ID=LmxM.05.0070_SLAS_1;Promastigote=23;Intracellular_Amastigote=0;Axenic_Amastigote=21;
LmxM.05	MF_V1	SLAS	23107	23108	.	+	.	ID=LmxM.05.0070_SLAS_2;Promastigote=34;Intracellular_Amastigote=11;Axenic_Amastigote=41;
LmxM.05	MF_V1	SLAS	23116	23117	.	+	.	ID=LmxM.05.0070_SLAS_3;Promastigote=49;Intracellular_Amastigote=18;Axenic_Amastigote=56;
LmxM.05	MF_V1	SLAS	23119	23120	.	+	.	ID=LmxM.05.0070_SLAS_4;Promastigote=3;Intracellular_Amastigote=2;Axenic_Amastigote=5;
LmxM.05	MF_V1	SLAS	24295	24296	.	+	.	ID=LmxM.05.0080_SLAS_1;Promastigote=50;Intracellular_Amastigote=42;Axenic_Amastigote=70;
LmxM.05	MF_V1	SLAS	24317	24318	.	+	.	ID=LmxM.05.0080_SLAS_2;Promastigote=4;Intracellular_Amastigote=3;Axenic_Amastigote=10;
LmxM.05	MF_V1	SLAS	25675	25676	.	+	.	ID=LmxM.05.0090_SLAS_1;Promastigote=3;Intracellular_Amastigote=12;Axenic_Amastigote=7;
LmxM.05	MF_V1	SLAS	25694	25695	.	+	.	ID=LmxM.05.0090_SLAS_2;Promastigote=9;Intracellular_Amastigote=45;Axenic_Amastigote=31;
LmxM.05	MF_V1	SLAS	25783	25784	.	+	.	ID=LmxM.05.0090_SLAS_3;Promastigote=8;Intracellular_Amastigote=7;Axenic_Amastigote=6;
LmxM.05	MF_V1	SLAS	25838	25839	.	+	.	ID=LmxM.05.0090_SLAS_4;Promastigote=144;Intracellular_Amastigote=74;Axenic_Amastigote=186;
LmxM.05	MF_V1	SLAS	25852	25853	.	+	.	ID=LmxM.05.0090_SLAS_5;Promastigote=18;Intracellular_Amastigote=47;Axenic_Amastigote=46;
LmxM.05	MF_V1	SLAS	27634	27635	.	+	.	ID=LmxM.05.0100_SLAS_1;Promastigote=121;Intracellular_Amastigote=61;Axenic_Amastigote=126;
LmxM.05	MF_V1	SLAS	33604	33605	.	+	.	ID=LmxM.05.0110_SLAS_1;Promastigote=51;Intracellular_Amastigote=59;Axenic_Amastigote=43;
LmxM.05	MF_V1	SLAS	33618	33619	.	+	.	ID=LmxM.05.0110_SLAS_2;Promastigote=33;Intracellular_Amastigote=30;Axenic_Amastigote=34;
LmxM.05	MF_V1	SLAS	34735	34736	.	+	.	ID=LmxM.05.0120_SLAS_1;Promastigote=31;Intracellular_Amastigote=25;Axenic_Amastigote=79;
LmxM.05	MF_V1	SLAS	36917	36918	.	+	.	ID=LmxM.05.0130_SLAS_1;Promastigote=172;Intracellular_Amastigote=51;Axenic_Amastigote=154;
LmxM.05	MF_V1	SLAS	40465	40466	.	+	.	ID=LmxM.05.0140_SLAS_1;Promastigote=0;Intracellular_Amastigote=3;Axenic_Amastigote=7;
LmxM.05	MF_V1	SLAS	41475	41476	.	+	.	ID=LmxM.05.0140_SLAS_2;Promastigote=434;Intracellular_Amastigote=50;Axenic_Amastigote=255;
LmxM.05	MF_V1	SLAS	41489	41490	.	+	.	ID=LmxM.05.0140_SLAS_3;Promastigote=9;Intracellular_Amastigote=1;Axenic_Amastigote=9;
LmxM.05	MF_V1	SLAS	41564	41565	.	+	.	ID=LmxM.05.0140_SLAS_4;Promastigote=40;Intracellular_Amastigote=32;Axenic_Amastigote=60;
LmxM.05	MF_V1	SLAS	41592	41593	.	+	.	ID=LmxM.05.0140_SLAS_5;Promastigote=9;Intracellular_Amastigote=3;Axenic_Amastigote=11;
LmxM.05	MF_V1	SLAS	41603	41604	.	+	.	ID=LmxM.05.0140_SLAS_6;Promastigote=3;Intracellular_Amastigote=2;Axenic_Amastigote=4;
LmxM.05	MF_V1	SLAS	44831	44832	.	+	.	ID=LmxM.05.0150_SLAS_1;Promastigote=150;Intracellular_Amastigote=44;Axenic_Amastigote=117;
LmxM.05	MF_V1	SLAS	44839	44840	.	+	.	ID=LmxM.05.0150_SLAS_2;Promastigote=5;Intracellular_Amastigote=3;Axenic_Amastigote=1;
LmxM.05	MF_V1	SLAS	47024	47025	.	+	.	ID=LmxM.05.0160_SLAS_1;Promastigote=191;Intracellular_Amastigote=37;Axenic_Amastigote=304;
LmxM.05	MF_V1	SLAS	47047	47048	.	+	.	ID=LmxM.05.0160_SLAS_2;Promastigote=11;Intracellular_Amastigote=7;Axenic_Amastigote=17;
LmxM.05	MF_V1	SLAS	49429	49430	.	+	.	ID=LmxM.05.0170_SLAS_1;Promastigote=9;Intracellular_Amastigote=8;Axenic_Amastigote=12;
LmxM.05	MF_V1	SLAS	52612	52613	.	+	.	ID=LmxM.05.0180_SLAS_1;Promastigote=77;Intracellular_Amastigote=49;Axenic_Amastigote=68;
LmxM.05	MF_V1	SLAS	52940	52941	.	+	.	ID=LmxM.05.0180_SLAS_2;Promastigote=12;Intracellular_Amastigote=4;Axenic_Amastigote=9;
LmxM.05	MF_V1	SLAS	56077	56078	.	+	.	ID=LmxM.05.0190_SLAS_1;Promastigote=171;Intracellular_Amastigote=59;Axenic_Amastigote=148;
LmxM.05	MF_V1	SLAS	56121	56122	.	+	.	ID=LmxM.05.0190_SLAS_2;Promastigote=1;Intracellular_Amastigote=2;Axenic_Amastigote=9;
LmxM.05	MF_V1	SLAS	58023	58024	.	+	.	ID=LmxM.05.0200_SLAS_1;Promastigote=9;Intracellular_Amastigote=7;Axenic_Amastigote=8;
LmxM.05	MF_V1	SLAS	58190	58191	.	+	.	ID=LmxM.05.0200_SLAS_2;Promastigote=79;Intracellular_Amastigote=46;Axenic_Amastigote=119;
LmxM.05	MF_V1	SLAS	58193	58194	.	+	.	ID=LmxM.05.0200_SLAS_3;Promastigote=49;Intracellular_Amastigote=25;Axenic_Amastigote=74;
LmxM.05	MF_V1	SLAS	58205	58206	.	+	.	ID=LmxM.05.0200_SLAS_4;Promastigote=7;Intracellular_Amastigote=2;Axenic_Amastigote=19;
LmxM.05	MF_V1	SLAS	61412	61413	.	+	.	ID=LmxM.05.0210_SLAS_1;Promastigote=4;Intracellular_Amastigote=2;Axenic_Amastigote=4;
LmxM.05	MF_V1	SLAS	61493	61494	.	+	.	ID=LmxM.05.0210_SLAS_2;Promastigote=11;Intracellular_Amastigote=8;Axenic_Amastigote=32;
LmxM.05	MF_V1	SLAS	66678	66679	.	+	.	ID=LmxM.05.0220_SLAS_1;Promastigote=147;Intracellular_Amastigote=81;Axenic_Amastigote=143;
LmxM.05	MF_V1	SLAS	66686	66687	.	+	.	ID=LmxM.05.0220_SLAS_2;Promastigote=13;Intracellular_Amastigote=8;Axenic_Amastigote=18;
LmxM.05	MF_V1	SLAS	74083	74084	.	+	.	ID=LmxM.05.0230_SLAS_1;Promastigote=67;Intracellular_Amastigote=3;Axenic_Amastigote=83;
LmxM.05	MF_V1	SLAS	74090	74091	.	+	.	ID=LmxM.05.0230_SLAS_2;Promastigote=108;Intracellular_Amastigote=18;Axenic_Amastigote=209;
LmxM.05	MF_V1	SLAS	76721	76722	.	+	.	ID=LmxM.05.0240_SLAS_1;Promastigote=126;Intracellular_Amastigote=18;Axenic_Amastigote=25;
LmxM.05	MF_V1	SLAS	76762	76763	.	+	.	ID=LmxM.05.0240_SLAS_2;Promastigote=3;Intracellular_Amastigote=1;Axenic_Amastigote=9;
LmxM.05	MF_V1	SLAS	76892	76893	.	+	.	ID=LmxM.05.0240_SLAS_3;Promastigote=47;Intracellular_Amastigote=21;Axenic_Amastigote=45;
LmxM.05	MF_V1	SLAS	76946	76947	.	+	.	ID=LmxM.05.0240_SLAS_4;Promastigote=3;Intracellular_Amastigote=3;Axenic_Amastigote=3;
LmxM.05	MF_V1	SLAS	82149	82150	.	+	.	ID=LmxM.05.0241_SLAS_1;Promastigote=34;Intracellular_Amastigote=43;Axenic_Amastigote=37;
LmxM.05	MF_V1	SLAS	82152	82153	.	+	.	ID=LmxM.05.0241_SLAS_2;Promastigote=3;Intracellular_Amastigote=4;Axenic_Amastigote=2;
LmxM.05	MF_V1	SLAS	87696	87697	.	+	.	ID=LmxM.05.0250_SLAS_1;Promastigote=17;Intracellular_Amastigote=70;Axenic_Amastigote=27;
LmxM.05	MF_V1	SLAS	87699	87700	.	+	.	ID=LmxM.05.0250_SLAS_2;Promastigote=1;Intracellular_Amastigote=5;Axenic_Amastigote=7;
LmxM.05	MF_V1	SLAS	88340	88341	.	+	.	ID=LmxM.05.0250_SLAS_3;Promastigote=24;Intracellular_Amastigote=4;Axenic_Amastigote=16;
LmxM.05	MF_V1	SLAS	88370	88371	.	+	.	ID=LmxM.05.0250_SLAS_4;Promastigote=14;Intracellular_Amastigote=2;Axenic_Amastigote=30;
LmxM.05	MF_V1	SLAS	89295	89296	.	+	.	ID=LmxM.05.0260_SLAS_1;Promastigote=13;Intracellular_Amastigote=5;Axenic_Amastigote=21;
LmxM.05	MF_V1	SLAS	91249	91250	.	+	.	ID=LmxM.05.0270_SLAS_1;Promastigote=170;Intracellular_Amastigote=65;Axenic_Amastigote=141;
LmxM.05	MF_V1	SLAS	91310	91311	.	+	.	ID=LmxM.05.0270_SLAS_2;Promastigote=46;Intracellular_Amastigote=16;Axenic_Amastigote=53;
LmxM.05	MF_V1	SLAS	93844	93845	.	+	.	ID=LmxM.05.0280_SLAS_1;Promastigote=196;Intracellular_Amastigote=62;Axenic_Amastigote=181;
LmxM.05	MF_V1	SLAS	95430	95431	.	+	.	ID=LmxM.05.0285_SLAS_1;Promastigote=80;Intracellular_Amastigote=13;Axenic_Amastigote=89;
LmxM.05	MF_V1	SLAS	96209	96210	.	+	.	ID=LmxM.05.0285_SLAS_2;Promastigote=29;Intracellular_Amastigote=13;Axenic_Amastigote=74;
LmxM.05	MF_V1	SLAS	96372	96373	.	+	.	ID=LmxM.05.0285_SLAS_3;Promastigote=2;Intracellular_Amastigote=7;Axenic_Amastigote=3;
LmxM.05	MF_V1	SLAS	98100	98101	.	+	.	ID=LmxM.05.0290_SLAS_1;Promastigote=120;Intracellular_Amastigote=104;Axenic_Amastigote=132;
LmxM.05	MF_V1	SLAS	98113	98114	.	+	.	ID=LmxM.05.0290_SLAS_2;Promastigote=18;Intracellular_Amastigote=10;Axenic_Amastigote=15;
LmxM.05	MF_V1	SLAS	98163	98164	.	+	.	ID=LmxM.05.0290_SLAS_3;Promastigote=3;Intracellular_Amastigote=0;Axenic_Amastigote=6;
LmxM.05	MF_V1	SLAS	100543	100544	.	+	.	ID=LmxM.05.0300_SLAS_1;Promastigote=545;Intracellular_Amastigote=233;Axenic_Amastigote=489;
LmxM.05	MF_V1	SLAS	103240	103241	.	+	.	ID=LmxM.05.0310_SLAS_1;Promastigote=32;Intracellular_Amastigote=22;Axenic_Amastigote=30;
LmxM.05	MF_V1	SLAS	103355	103356	.	+	.	ID=LmxM.05.0310_SLAS_2;Promastigote=1;Intracellular_Amastigote=2;Axenic_Amastigote=9;
LmxM.05	MF_V1	SLAS	104765	104766	.	+	.	ID=LmxM.05.0330_SLAS_1;Promastigote=8;Intracellular_Amastigote=33;Axenic_Amastigote=19;
LmxM.05	MF_V1	SLAS	105225	105226	.	+	.	ID=LmxM.05.0330_SLAS_2;Promastigote=24;Intracellular_Amastigote=23;Axenic_Amastigote=66;
LmxM.05	MF_V1	SLAS	108996	108997	.	+	.	ID=LmxM.05.0340_SLAS_1;Promastigote=25;Intracellular_Amastigote=23;Axenic_Amastigote=41;
LmxM.05	MF_V1	SLAS	109078	109079	.	+	.	ID=LmxM.05.0340_SLAS_2;Promastigote=2;Intracellular_Amastigote=3;Axenic_Amastigote=5;
LmxM.05	MF_V1	SLAS	111016	111017	.	+	.	ID=LmxM.05_111769_SLAS_1;Promastigote=50;Intracellular_Amastigote=76;Axenic_Amastigote=112;
LmxM.05	MF_V1	SLAS	111083	111084	.	+	.	ID=LmxM.05_111769_SLAS_2;Promastigote=2;Intracellular_Amastigote=7;Axenic_Amastigote=8;
LmxM.05	MF_V1	SLAS	111267	111268	.	+	.	ID=LmxM.05_111769_SLAS_3;Promastigote=3;Intracellular_Amastigote=12;Axenic_Amastigote=39;
LmxM.05	MF_V1	SLAS	111398	111399	.	+	.	ID=LmxM.05_111769_SLAS_4;Promastigote=1;Intracellular_Amastigote=1;Axenic_Amastigote=15;
LmxM.05	MF_V1	SLAS	113394	113395	.	+	.	ID=LmxM.05.0350_SLAS_1;Promastigote=181;Intracellular_Amastigote=35;Axenic_Amastigote=217;
LmxM.05	MF_V1	SLAS	113400	113401	.	+	.	ID=LmxM.05.0350_SLAS_2;Promastigote=19;Intracellular_Amastigote=13;Axenic_Amastigote=30;
LmxM.05	MF_V1	SLAS	113451	113452	.	+	.	ID=LmxM.05.0350_SLAS_3;Promastigote=25;Intracellular_Amastigote=3;Axenic_Amastigote=24;
LmxM.05	MF_V1	SLAS	113511	113512	.	+	.	ID=LmxM.05.0350_SLAS_4;Promastigote=5;Intracellular_Amastigote=3;Axenic_Amastigote=3;
LmxM.05	MF_V1	SLAS	116127	116128	.	+	.	ID=LmxM.05.0360_SLAS_1;Promastigote=645;Intracellular_Amastigote=241;Axenic_Amastigote=563;
LmxM.05	MF_V1	SLAS	116130	116131	.	+	.	ID=LmxM.05.0360_SLAS_2;Promastigote=131;Intracellular_Amastigote=41;Axenic_Amastigote=121;
LmxM.05	MF_V1	SLAS	118671	118672	.	+	.	ID=LmxM.05.0370_SLAS_1;Promastigote=387;Intracellular_Amastigote=84;Axenic_Amastigote=199;
LmxM.05	MF_V1	SLAS	118760	118761	.	+	.	ID=LmxM.05.0370_SLAS_2;Promastigote=10;Intracellular_Amastigote=3;Axenic_Amastigote=13;
LmxM.05	MF_V1	SLAS	121123	121124	.	+	.	ID=LmxM.05.0380_SLAS_1;Promastigote=68;Intracellular_Amastigote=26;Axenic_Amastigote=39;
LmxM.05	MF_V1	SLAS	121196	121197	.	+	.	ID=LmxM.05.0380_SLAS_2;Promastigote=66;Intracellular_Amastigote=11;Axenic_Amastigote=47;
LmxM.05	MF_V1	SLAS	121254	121255	.	+	.	ID=LmxM.05.0380_SLAS_3;Promastigote=5;Intracellular_Amastigote=0;Axenic_Amastigote=11;
LmxM.05	MF_V1	SLAS	129882	129883	.	+	.	ID=LmxM.05.0390_SLAS_1;Promastigote=447;Intracellular_Amastigote=203;Axenic_Amastigote=550;
LmxM.05	MF_V1	SLAS	129884	129885	.	+	.	ID=LmxM.05.0390_SLAS_2;Promastigote=26;Intracellular_Amastigote=13;Axenic_Amastigote=22;
LmxM.05	MF_V1	SLAS	129899	129900	.	+	.	ID=LmxM.05.0390_SLAS_3;Promastigote=60;Intracellular_Amastigote=36;Axenic_Amastigote=118;
LmxM.05	MF_V1	SLAS	129919	129920	.	+	.	ID=LmxM.05.0390_SLAS_4;Promastigote=1;Intracellular_Amastigote=1;Axenic_Amastigote=7;
LmxM.05	MF_V1	SLAS	130978	130979	.	+	.	ID=LmxM.05.0390_SLAS_5;Promastigote=19;Intracellular_Amastigote=23;Axenic_Amastigote=22;
LmxM.05	MF_V1	SLAS	131090	131091	.	+	.	ID=LmxM.05.0390_SLAS_6;Promastigote=5;Intracellular_Amastigote=1;Axenic_Amastigote=3;
LmxM.05	MF_V1	SLAS	131395	131396	.	+	.	ID=LmxM.05.0390_SLAS_7;Promastigote=2;Intracellular_Amastigote=3;Axenic_Amastigote=4;
LmxM.05	MF_V1	SLAS	135788	135789	.	+	.	ID=LmxM.05.0400_SLAS_1;Promastigote=26;Intracellular_Amastigote=8;Axenic_Amastigote=26;
LmxM.05	MF_V1	SLAS	135812	135813	.	+	.	ID=LmxM.05.0400_SLAS_2;Promastigote=160;Intracellular_Amastigote=89;Axenic_Amastigote=183;
LmxM.05	MF_V1	SLAS	135854	135855	.	+	.	ID=LmxM.05.0400_SLAS_3;Promastigote=3;Intracellular_Amastigote=0;Axenic_Amastigote=8;
LmxM.05	MF_V1	SLAS	140547	140548	.	+	.	ID=LmxM.05.0410_SLAS_1;Promastigote=28;Intracellular_Amastigote=7;Axenic_Amastigote=22;
LmxM.05	MF_V1	SLAS	144020	144021	.	+	.	ID=LmxM.05.0420_SLAS_1;Promastigote=746;Intracellular_Amastigote=340;Axenic_Amastigote=429;
LmxM.05	MF_V1	SLAS	145340	145341	.	+	.	ID=LmxM.05_145594_SLAS_1;Promastigote=151;Intracellular_Amastigote=26;Axenic_Amastigote=178;
LmxM.05	MF_V1	SLAS	147043	147044	.	+	.	ID=LmxM.05.0430_SLAS_1;Promastigote=2;Intracellular_Amastigote=4;Axenic_Amastigote=10;
LmxM.05	MF_V1	SLAS	149759	149760	.	+	.	ID=LmxM.05.0440_SLAS_1;Promastigote=10;Intracellular_Amastigote=18;Axenic_Amastigote=9;
LmxM.05	MF_V1	SLAS	153481	153482	.	+	.	ID=LmxM.05.0450_SLAS_1;Promastigote=1556;Intracellular_Amastigote=956;Axenic_Amastigote=1847;
LmxM.05	MF_V1	SLAS	153490	153491	.	+	.	ID=LmxM.05.0450_SLAS_2;Promastigote=103;Intracellular_Amastigote=60;Axenic_Amastigote=189;
LmxM.05	MF_V1	SLAS	153495	153496	.	+	.	ID=LmxM.05.0450_SLAS_3;Promastigote=16;Intracellular_Amastigote=22;Axenic_Amastigote=47;
LmxM.05	MF_V1	SLAS	153539	153540	.	+	.	ID=LmxM.05.0450_SLAS_4;Promastigote=2;Intracellular_Amastigote=2;Axenic_Amastigote=5;
LmxM.05	MF_V1	SLAS	154872	154873	.	+	.	ID=LmxM.05.0460_SLAS_1;Promastigote=3;Intracellular_Amastigote=7;Axenic_Amastigote=7;
LmxM.05	MF_V1	SLAS	158223	158224	.	+	.	ID=LmxM.05.0470_SLAS_1;Promastigote=10;Intracellular_Amastigote=19;Axenic_Amastigote=28;
LmxM.05	MF_V1	SLAS	159949	159950	.	+	.	ID=LmxM.05.0480_SLAS_1;Promastigote=3;Intracellular_Amastigote=1;Axenic_Amastigote=5;
LmxM.05	MF_V1	SLAS	166280	166281	.	+	.	ID=LmxM.05.0490_SLAS_1;Promastigote=227;Intracellular_Amastigote=40;Axenic_Amastigote=135;
LmxM.05	MF_V1	SLAS	166375	166376	.	+	.	ID=LmxM.05.0490_SLAS_2;Promastigote=24;Intracellular_Amastigote=4;Axenic_Amastigote=25;
LmxM.05	MF_V1	SLAS	168661	168662	.	+	.	ID=LmxM.05.0500_SLAS_1;Promastigote=78;Intracellular_Amastigote=5;Axenic_Amastigote=80;
LmxM.05	MF_V1	SLAS	172371	172372	.	+	.	ID=LmxM.05.0510_SLAS_1;Promastigote=107;Intracellular_Amastigote=8;Axenic_Amastigote=121;
LmxM.05	MF_V1	SLAS	175825	175826	.	+	.	ID=LmxM.05.0520_SLAS_1;Promastigote=111;Intracellular_Amastigote=65;Axenic_Amastigote=132;
LmxM.05	MF_V1	SLAS	175828	175829	.	+	.	ID=LmxM.05.0520_SLAS_2;Promastigote=10;Intracellular_Amastigote=7;Axenic_Amastigote=14;
LmxM.05	MF_V1	SLAS	175980	175981	.	+	.	ID=LmxM.05.0520_SLAS_3;Promastigote=6;Intracellular_Amastigote=1;Axenic_Amastigote=7;
LmxM.05	MF_V1	SLAS	178214	178215	.	+	.	ID=LmxM.05.0530_SLAS_1;Promastigote=62;Intracellular_Amastigote=4;Axenic_Amastigote=90;
LmxM.05	MF_V1	SLAS	178405	178406	.	+	.	ID=LmxM.05.0530_SLAS_2;Promastigote=11;Intracellular_Amastigote=2;Axenic_Amastigote=27;
LmxM.05	MF_V1	SLAS	185140	185141	.	+	.	ID=LmxM.05.0540_SLAS_1;Promastigote=44;Intracellular_Amastigote=43;Axenic_Amastigote=87;
LmxM.05	MF_V1	SLAS	185158	185159	.	+	.	ID=LmxM.05.0540_SLAS_2;Promastigote=3;Intracellular_Amastigote=3;Axenic_Amastigote=4;
LmxM.05	MF_V1	SLAS	185164	185165	.	+	.	ID=LmxM.05.0540_SLAS_3;Promastigote=11;Intracellular_Amastigote=13;Axenic_Amastigote=20;
LmxM.05	MF_V1	SLAS	185173	185174	.	+	.	ID=LmxM.05.0540_SLAS_4;Promastigote=4;Intracellular_Amastigote=12;Axenic_Amastigote=18;
LmxM.05	MF_V1	SLAS	189097	189098	.	+	.	ID=LmxM.05.0560_SLAS_1;Promastigote=37;Intracellular_Amastigote=15;Axenic_Amastigote=45;
LmxM.05	MF_V1	SLAS	189177	189178	.	+	.	ID=LmxM.05.0560_SLAS_2;Promastigote=7;Intracellular_Amastigote=5;Axenic_Amastigote=10;
LmxM.05	MF_V1	SLAS	192913	192914	.	+	.	ID=LmxM.05.0570_SLAS_1;Promastigote=136;Intracellular_Amastigote=184;Axenic_Amastigote=187;
LmxM.05	MF_V1	SLAS	194982	194983	.	+	.	ID=LmxM.05.0580_SLAS_1;Promastigote=146;Intracellular_Amastigote=114;Axenic_Amastigote=211;
LmxM.05	MF_V1	SLAS	196754	196755	.	+	.	ID=LmxM.05.0580_SLAS_2;Promastigote=4;Intracellular_Amastigote=3;Axenic_Amastigote=4;
LmxM.05	MF_V1	SLAS	200257	200258	.	+	.	ID=LmxM.05.0590_SLAS_1;Promastigote=15;Intracellular_Amastigote=17;Axenic_Amastigote=16;
LmxM.05	MF_V1	SLAS	200312	200313	.	+	.	ID=LmxM.05.0590_SLAS_2;Promastigote=15;Intracellular_Amastigote=7;Axenic_Amastigote=23;
LmxM.05	MF_V1	SLAS	200319	200320	.	+	.	ID=LmxM.05.0590_SLAS_3;Promastigote=7;Intracellular_Amastigote=2;Axenic_Amastigote=7;
LmxM.05	MF_V1	SLAS	203813	203814	.	+	.	ID=LmxM.05.0600_SLAS_1;Promastigote=26;Intracellular_Amastigote=16;Axenic_Amastigote=97;
LmxM.05	MF_V1	SLAS	207204	207205	.	+	.	ID=LmxM.05.0610_SLAS_1;Promastigote=41;Intracellular_Amastigote=19;Axenic_Amastigote=93;
LmxM.05	MF_V1	SLAS	207207	207208	.	+	.	ID=LmxM.05.0610_SLAS_2;Promastigote=6;Intracellular_Amastigote=0;Axenic_Amastigote=5;
LmxM.05	MF_V1	SLAS	207239	207240	.	+	.	ID=LmxM.05.0610_SLAS_3;Promastigote=10;Intracellular_Amastigote=14;Axenic_Amastigote=21;
LmxM.05	MF_V1	SLAS	210902	210903	.	+	.	ID=LmxM.05.0620_SLAS_1;Promastigote=21;Intracellular_Amastigote=6;Axenic_Amastigote=25;
LmxM.05	MF_V1	SLAS	210928	210929	.	+	.	ID=LmxM.05.0620_SLAS_2;Promastigote=6;Intracellular_Amastigote=4;Axenic_Amastigote=6;
LmxM.05	MF_V1	SLAS	210993	210994	.	+	.	ID=LmxM.05.0620_SLAS_3;Promastigote=52;Intracellular_Amastigote=13;Axenic_Amastigote=87;
LmxM.05	MF_V1	SLAS	210996	210997	.	+	.	ID=LmxM.05.0620_SLAS_4;Promastigote=12;Intracellular_Amastigote=4;Axenic_Amastigote=16;
LmxM.05	MF_V1	SLAS	214637	214638	.	+	.	ID=LmxM.05.0630_SLAS_1;Promastigote=80;Intracellular_Amastigote=28;Axenic_Amastigote=93;
LmxM.05	MF_V1	SLAS	214653	214654	.	+	.	ID=LmxM.05.0630_SLAS_2;Promastigote=8;Intracellular_Amastigote=2;Axenic_Amastigote=2;
LmxM.05	MF_V1	SLAS	219259	219260	.	+	.	ID=LmxM.05.0640_SLAS_1;Promastigote=12;Intracellular_Amastigote=0;Axenic_Amastigote=4;
LmxM.05	MF_V1	SLAS	219334	219335	.	+	.	ID=LmxM.05.0640_SLAS_2;Promastigote=23;Intracellular_Amastigote=1;Axenic_Amastigote=19;
LmxM.05	MF_V1	SLAS	226147	226148	.	+	.	ID=LmxM.05.0650_SLAS_1;Promastigote=17;Intracellular_Amastigote=2;Axenic_Amastigote=4;
LmxM.05	MF_V1	SLAS	230897	230898	.	+	.	ID=LmxM.05.0660_SLAS_1;Promastigote=72;Intracellular_Amastigote=26;Axenic_Amastigote=100;
LmxM.05	MF_V1	SLAS	230930	230931	.	+	.	ID=LmxM.05.0660_SLAS_2;Promastigote=2;Intracellular_Amastigote=1;Axenic_Amastigote=6;
LmxM.05	MF_V1	SLAS	231444	231445	.	+	.	ID=LmxM.05.0660_SLAS_3;Promastigote=82;Intracellular_Amastigote=129;Axenic_Amastigote=135;
LmxM.05	MF_V1	SLAS	231482	231483	.	+	.	ID=LmxM.05.0660_SLAS_4;Promastigote=3;Intracellular_Amastigote=4;Axenic_Amastigote=6;
LmxM.05	MF_V1	SLAS	233123	233124	.	+	.	ID=LmxM.05.0670_SLAS_1;Promastigote=145;Intracellular_Amastigote=44;Axenic_Amastigote=176;
LmxM.05	MF_V1	SLAS	233383	233384	.	+	.	ID=LmxM.05.0670_SLAS_2;Promastigote=7;Intracellular_Amastigote=4;Axenic_Amastigote=8;
LmxM.05	MF_V1	SLAS	242416	242417	.	+	.	ID=LmxM.05.0680_SLAS_1;Promastigote=76;Intracellular_Amastigote=10;Axenic_Amastigote=48;
LmxM.05	MF_V1	SLAS	242432	242433	.	+	.	ID=LmxM.05.0680_SLAS_2;Promastigote=52;Intracellular_Amastigote=25;Axenic_Amastigote=67;
LmxM.05	MF_V1	SLAS	242543	242544	.	+	.	ID=LmxM.05.0680_SLAS_3;Promastigote=119;Intracellular_Amastigote=35;Axenic_Amastigote=103;
LmxM.05	MF_V1	SLAS	244614	244615	.	+	.	ID=LmxM.05.0690_SLAS_1;Promastigote=37;Intracellular_Amastigote=3;Axenic_Amastigote=45;
LmxM.05	MF_V1	SLAS	244632	244633	.	+	.	ID=LmxM.05.0690_SLAS_2;Promastigote=3;Intracellular_Amastigote=1;Axenic_Amastigote=6;
LmxM.05	MF_V1	SLAS	253548	253549	.	+	.	ID=LmxM.05_253920_SLAS_1;Promastigote=70;Intracellular_Amastigote=26;Axenic_Amastigote=92;
LmxM.05	MF_V1	SLAS	253555	253556	.	+	.	ID=LmxM.05_253920_SLAS_2;Promastigote=2;Intracellular_Amastigote=1;Axenic_Amastigote=12;
LmxM.05	MF_V1	SLAS	253558	253559	.	+	.	ID=LmxM.05_253920_SLAS_3;Promastigote=4;Intracellular_Amastigote=2;Axenic_Amastigote=7;
LmxM.05	MF_V1	SLAS	254417	254418	.	+	.	ID=LmxM.05.0700_SLAS_1;Promastigote=26;Intracellular_Amastigote=4;Axenic_Amastigote=21;
LmxM.05	MF_V1	SLAS	254419	254420	.	+	.	ID=LmxM.05.0700_SLAS_2;Promastigote=172;Intracellular_Amastigote=26;Axenic_Amastigote=105;
LmxM.05	MF_V1	SLAS	254430	254431	.	+	.	ID=LmxM.05.0700_SLAS_3;Promastigote=25;Intracellular_Amastigote=5;Axenic_Amastigote=17;
LmxM.05	MF_V1	SLAS	254435	254436	.	+	.	ID=LmxM.05.0700_SLAS_4;Promastigote=5;Intracellular_Amastigote=6;Axenic_Amastigote=15;
LmxM.05	MF_V1	SLAS	254601	254602	.	+	.	ID=LmxM.05.0700_SLAS_5;Promastigote=14;Intracellular_Amastigote=4;Axenic_Amastigote=20;
LmxM.05	MF_V1	SLAS	261101	261102	.	+	.	ID=LmxM.05.0710_SLAS_1;Promastigote=160;Intracellular_Amastigote=65;Axenic_Amastigote=177;
LmxM.05	MF_V1	SLAS	261124	261125	.	+	.	ID=LmxM.05.0710_SLAS_2;Promastigote=23;Intracellular_Amastigote=28;Axenic_Amastigote=23;
LmxM.05	MF_V1	SLAS	261143	261144	.	+	.	ID=LmxM.05.0710_SLAS_3;Promastigote=7;Intracellular_Amastigote=0;Axenic_Amastigote=7;
LmxM.05	MF_V1	SLAS	267829	267830	.	+	.	ID=LmxM.05.0720_SLAS_1;Promastigote=78;Intracellular_Amastigote=29;Axenic_Amastigote=106;
LmxM.05	MF_V1	SLAS	274137	274138	.	+	.	ID=LmxM.05.0730_SLAS_1;Promastigote=46;Intracellular_Amastigote=22;Axenic_Amastigote=54;
LmxM.05	MF_V1	SLAS	274149	274150	.	+	.	ID=LmxM.05.0730_SLAS_2;Promastigote=7;Intracellular_Amastigote=10;Axenic_Amastigote=17;
LmxM.05	MF_V1	SLAS	274266	274267	.	+	.	ID=LmxM.05.0730_SLAS_3;Promastigote=4;Intracellular_Amastigote=2;Axenic_Amastigote=7;
LmxM.05	MF_V1	SLAS	277992	277993	.	+	.	ID=LmxM.05.0740_SLAS_1;Promastigote=8;Intracellular_Amastigote=5;Axenic_Amastigote=7;
LmxM.05	MF_V1	SLAS	278040	278041	.	+	.	ID=LmxM.05.0740_SLAS_2;Promastigote=80;Intracellular_Amastigote=26;Axenic_Amastigote=90;
LmxM.05	MF_V1	SLAS	278157	278158	.	+	.	ID=LmxM.05.0740_SLAS_3;Promastigote=60;Intracellular_Amastigote=51;Axenic_Amastigote=135;
LmxM.05	MF_V1	SLAS	278163	278164	.	+	.	ID=LmxM.05.0740_SLAS_4;Promastigote=10;Intracellular_Amastigote=7;Axenic_Amastigote=17;
LmxM.05	MF_V1	SLAS	280603	280604	.	+	.	ID=LmxM.05.0750_SLAS_1;Promastigote=302;Intracellular_Amastigote=51;Axenic_Amastigote=387;
LmxM.05	MF_V1	SLAS	283992	283993	.	+	.	ID=LmxM.05.0760_SLAS_1;Promastigote=13;Intracellular_Amastigote=5;Axenic_Amastigote=0;
LmxM.05	MF_V1	SLAS	284044	284045	.	+	.	ID=LmxM.05.0760_SLAS_2;Promastigote=8;Intracellular_Amastigote=7;Axenic_Amastigote=11;
LmxM.05	MF_V1	SLAS	289972	289973	.	+	.	ID=LmxM.05.0770_SLAS_1;Promastigote=6;Intracellular_Amastigote=0;Axenic_Amastigote=8;
LmxM.05	MF_V1	SLAS	290189	290190	.	+	.	ID=LmxM.05.0770_SLAS_2;Promastigote=36;Intracellular_Amastigote=12;Axenic_Amastigote=62;
LmxM.05	MF_V1	SLAS	290222	290223	.	+	.	ID=LmxM.05.0770_SLAS_3;Promastigote=35;Intracellular_Amastigote=23;Axenic_Amastigote=42;
LmxM.05	MF_V1	SLAS	290254	290255	.	+	.	ID=LmxM.05.0770_SLAS_4;Promastigote=7;Intracellular_Amastigote=3;Axenic_Amastigote=7;
LmxM.05	MF_V1	SLAS	295712	295713	.	+	.	ID=LmxM.05_296301_SLAS_1;Promastigote=80;Intracellular_Amastigote=10;Axenic_Amastigote=51;
LmxM.05	MF_V1	SLAS	295847	295848	.	+	.	ID=LmxM.05_296301_SLAS_2;Promastigote=4;Intracellular_Amastigote=4;Axenic_Amastigote=6;
LmxM.05	MF_V1	SLAS	297664	297665	.	+	.	ID=LmxM.05.0790_SLAS_1;Promastigote=2;Intracellular_Amastigote=0;Axenic_Amastigote=10;
LmxM.05	MF_V1	SLAS	297714	297715	.	+	.	ID=LmxM.05.0790_SLAS_2;Promastigote=58;Intracellular_Amastigote=89;Axenic_Amastigote=106;
LmxM.05	MF_V1	SLAS	297738	297739	.	+	.	ID=LmxM.05.0790_SLAS_3;Promastigote=16;Intracellular_Amastigote=3;Axenic_Amastigote=34;
LmxM.05	MF_V1	SLAS	299712	299713	.	+	.	ID=LmxM.05.0800_SLAS_1;Promastigote=58;Intracellular_Amastigote=23;Axenic_Amastigote=119;
LmxM.05	MF_V1	SLAS	299724	299725	.	+	.	ID=LmxM.05.0800_SLAS_2;Promastigote=12;Intracellular_Amastigote=22;Axenic_Amastigote=27;
LmxM.05	MF_V1	SLAS	301881	301882	.	+	.	ID=LmxM.05.0810_SLAS_1;Promastigote=34;Intracellular_Amastigote=84;Axenic_Amastigote=99;
LmxM.05	MF_V1	SLAS	301887	301888	.	+	.	ID=LmxM.05.0810_SLAS_2;Promastigote=2;Intracellular_Amastigote=9;Axenic_Amastigote=10;
LmxM.05	MF_V1	SLAS	301889	301890	.	+	.	ID=LmxM.05.0810_SLAS_3;Promastigote=2;Intracellular_Amastigote=6;Axenic_Amastigote=6;
LmxM.05	MF_V1	SLAS	301907	301908	.	+	.	ID=LmxM.05.0810_SLAS_4;Promastigote=2;Intracellular_Amastigote=7;Axenic_Amastigote=15;
LmxM.05	MF_V1	SLAS	303238	303239	.	+	.	ID=LmxM.05.0820_SLAS_1;Promastigote=121;Intracellular_Amastigote=120;Axenic_Amastigote=134;
LmxM.05	MF_V1	SLAS	306873	306874	.	+	.	ID=LmxM.05.0830_SLAS_1;Promastigote=284;Intracellular_Amastigote=137;Axenic_Amastigote=212;
LmxM.05	MF_V1	SLAS	306943	306944	.	+	.	ID=LmxM.05.0830_SLAS_2;Promastigote=19;Intracellular_Amastigote=8;Axenic_Amastigote=23;
LmxM.05	MF_V1	SLAS	309295	309296	.	+	.	ID=LmxM.05.0840_SLAS_1;Promastigote=509;Intracellular_Amastigote=105;Axenic_Amastigote=405;
LmxM.05	MF_V1	SLAS	315981	315982	.	+	.	ID=LmxM.05.0850_SLAS_1;Promastigote=898;Intracellular_Amastigote=226;Axenic_Amastigote=700;
LmxM.05	MF_V1	SLAS	315988	315989	.	+	.	ID=LmxM.05.0850_SLAS_2;Promastigote=86;Intracellular_Amastigote=13;Axenic_Amastigote=45;
LmxM.05	MF_V1	SLAS	316000	316001	.	+	.	ID=LmxM.05.0850_SLAS_3;Promastigote=21;Intracellular_Amastigote=0;Axenic_Amastigote=16;
LmxM.05	MF_V1	SLAS	316010	316011	.	+	.	ID=LmxM.05.0850_SLAS_4;Promastigote=8;Intracellular_Amastigote=1;Axenic_Amastigote=14;
LmxM.05	MF_V1	SLAS	316183	316184	.	+	.	ID=LmxM.05.0850_SLAS_5;Promastigote=4;Intracellular_Amastigote=2;Axenic_Amastigote=8;
LmxM.05	MF_V1	SLAS	319148	319149	.	+	.	ID=LmxM.05.0860_SLAS_1;Promastigote=255;Intracellular_Amastigote=110;Axenic_Amastigote=424;
LmxM.05	MF_V1	SLAS	319160	319161	.	+	.	ID=LmxM.05.0860_SLAS_2;Promastigote=10;Intracellular_Amastigote=22;Axenic_Amastigote=23;
LmxM.05	MF_V1	SLAS	327072	327073	.	+	.	ID=LmxM.05.0880_SLAS_1;Promastigote=70;Intracellular_Amastigote=20;Axenic_Amastigote=49;
LmxM.05	MF_V1	SLAS	327122	327123	.	+	.	ID=LmxM.05.0880_SLAS_2;Promastigote=1478;Intracellular_Amastigote=590;Axenic_Amastigote=1161;
LmxM.05	MF_V1	SLAS	327130	327131	.	+	.	ID=LmxM.05.0880_SLAS_3;Promastigote=523;Intracellular_Amastigote=347;Axenic_Amastigote=590;
LmxM.05	MF_V1	SLAS	327133	327134	.	+	.	ID=LmxM.05.0880_SLAS_4;Promastigote=285;Intracellular_Amastigote=179;Axenic_Amastigote=378;
LmxM.05	MF_V1	SLAS	327142	327143	.	+	.	ID=LmxM.05.0880_SLAS_5;Promastigote=41;Intracellular_Amastigote=47;Axenic_Amastigote=64;
LmxM.05	MF_V1	SLAS	327145	327146	.	+	.	ID=LmxM.05.0880_SLAS_6;Promastigote=14;Intracellular_Amastigote=5;Axenic_Amastigote=9;
LmxM.05	MF_V1	SLAS	329045	329046	.	+	.	ID=LmxM.05.0890_SLAS_1;Promastigote=61;Intracellular_Amastigote=76;Axenic_Amastigote=61;
LmxM.05	MF_V1	SLAS	329069	329070	.	+	.	ID=LmxM.05.0890_SLAS_2;Promastigote=4;Intracellular_Amastigote=0;Axenic_Amastigote=7;
LmxM.05	MF_V1	SLAS	336235	336236	.	+	.	ID=LmxM.05.0900_SLAS_1;Promastigote=7;Intracellular_Amastigote=0;Axenic_Amastigote=6;
LmxM.05	MF_V1	SLAS	336313	336314	.	+	.	ID=LmxM.05.0900_SLAS_2;Promastigote=43;Intracellular_Amastigote=21;Axenic_Amastigote=32;
LmxM.05	MF_V1	SLAS	338831	338832	.	+	.	ID=LmxM.05.0910_SLAS_1;Promastigote=149;Intracellular_Amastigote=247;Axenic_Amastigote=296;
LmxM.05	MF_V1	SLAS	342530	342531	.	+	.	ID=LmxM.05.0920_SLAS_1;Promastigote=10;Intracellular_Amastigote=1;Axenic_Amastigote=3;
LmxM.05	MF_V1	SLAS	342610	342611	.	+	.	ID=LmxM.05.0920_SLAS_2;Promastigote=44;Intracellular_Amastigote=10;Axenic_Amastigote=29;
LmxM.05	MF_V1	SLAS	346489	346490	.	+	.	ID=LmxM.05.0930_SLAS_1;Promastigote=2;Intracellular_Amastigote=7;Axenic_Amastigote=23;
LmxM.05	MF_V1	SLAS	347516	347517	.	+	.	ID=LmxM.05.0930_SLAS_2;Promastigote=297;Intracellular_Amastigote=354;Axenic_Amastigote=418;
LmxM.05	MF_V1	SLAS	347519	347520	.	+	.	ID=LmxM.05.0930_SLAS_3;Promastigote=47;Intracellular_Amastigote=44;Axenic_Amastigote=68;
LmxM.05	MF_V1	SLAS	347542	347543	.	+	.	ID=LmxM.05.0930_SLAS_4;Promastigote=4;Intracellular_Amastigote=2;Axenic_Amastigote=8;
LmxM.05	MF_V1	SLAS	349920	349921	.	+	.	ID=LmxM.05.0940_SLAS_1;Promastigote=14;Intracellular_Amastigote=10;Axenic_Amastigote=13;
LmxM.05	MF_V1	SLAS	349964	349965	.	+	.	ID=LmxM.05.0940_SLAS_2;Promastigote=16;Intracellular_Amastigote=2;Axenic_Amastigote=8;
LmxM.05	MF_V1	SLAS	358618	358619	.	+	.	ID=LmxM.05.0960_SLAS_1;Promastigote=22;Intracellular_Amastigote=4;Axenic_Amastigote=7;
LmxM.05	MF_V1	SLAS	361294	361295	.	+	.	ID=LmxM.05_361535_SLAS_1;Promastigote=3;Intracellular_Amastigote=1;Axenic_Amastigote=5;
LmxM.05	MF_V1	SLAS	369917	369918	.	-	.	ID=LmxM.05.0970_SLAS_5;Promastigote=4;Intracellular_Amastigote=4;Axenic_Amastigote=15;
LmxM.05	MF_V1	SLAS	370021	370022	.	-	.	ID=LmxM.05.0970_SLAS_4;Promastigote=30;Intracellular_Amastigote=19;Axenic_Amastigote=31;
LmxM.05	MF_V1	SLAS	370025	370026	.	-	.	ID=LmxM.05.0970_SLAS_3;Promastigote=79;Intracellular_Amastigote=49;Axenic_Amastigote=71;
LmxM.05	MF_V1	SLAS	370262	370263	.	-	.	ID=LmxM.05.0970_SLAS_2;Promastigote=7;Intracellular_Amastigote=1;Axenic_Amastigote=2;
LmxM.05	MF_V1	SLAS	370269	370270	.	-	.	ID=LmxM.05.0970_SLAS_1;Promastigote=28;Intracellular_Amastigote=10;Axenic_Amastigote=14;
LmxM.05	MF_V1	SLAS	372816	372817	.	-	.	ID=LmxM.05.0980_SLAS_2;Promastigote=10;Intracellular_Amastigote=6;Axenic_Amastigote=16;
LmxM.05	MF_V1	SLAS	372832	372833	.	-	.	ID=LmxM.05.0980_SLAS_1;Promastigote=922;Intracellular_Amastigote=402;Axenic_Amastigote=714;
LmxM.05	MF_V1	SLAS	373532	373533	.	-	.	ID=LmxM.05.0990_SLAS_1;Promastigote=17;Intracellular_Amastigote=7;Axenic_Amastigote=19;
LmxM.05	MF_V1	SLAS	375619	375620	.	-	.	ID=LmxM.05.1000_SLAS_3;Promastigote=8;Intracellular_Amastigote=3;Axenic_Amastigote=7;
LmxM.05	MF_V1	SLAS	375680	375681	.	-	.	ID=LmxM.05.1000_SLAS_2;Promastigote=11;Intracellular_Amastigote=11;Axenic_Amastigote=17;
LmxM.05	MF_V1	SLAS	375722	375723	.	-	.	ID=LmxM.05.1000_SLAS_1;Promastigote=185;Intracellular_Amastigote=82;Axenic_Amastigote=387;
LmxM.05	MF_V1	SLAS	378504	378505	.	-	.	ID=LmxM.05.1010_SLAS_1;Promastigote=5;Intracellular_Amastigote=2;Axenic_Amastigote=10;
LmxM.05	MF_V1	SLAS	382036	382037	.	-	.	ID=LmxM.05.1020_SLAS_2;Promastigote=7;Intracellular_Amastigote=0;Axenic_Amastigote=8;
LmxM.05	MF_V1	SLAS	382076	382077	.	-	.	ID=LmxM.05.1020_SLAS_1;Promastigote=330;Intracellular_Amastigote=70;Axenic_Amastigote=218;
LmxM.05	MF_V1	SLAS	383006	383007	.	-	.	ID=LmxM.05.1030_SLAS_2;Promastigote=7;Intracellular_Amastigote=0;Axenic_Amastigote=4;
LmxM.05	MF_V1	SLAS	383027	383028	.	-	.	ID=LmxM.05.1030_SLAS_1;Promastigote=163;Intracellular_Amastigote=191;Axenic_Amastigote=179;
LmxM.05	MF_V1	SLAS	384538	384539	.	-	.	ID=LmxM.05.1040_SLAS_4;Promastigote=22;Intracellular_Amastigote=5;Axenic_Amastigote=32;
LmxM.05	MF_V1	SLAS	384564	384565	.	-	.	ID=LmxM.05.1040_SLAS_3;Promastigote=157;Intracellular_Amastigote=65;Axenic_Amastigote=102;
LmxM.05	MF_V1	SLAS	384578	384579	.	-	.	ID=LmxM.05.1040_SLAS_2;Promastigote=107;Intracellular_Amastigote=41;Axenic_Amastigote=47;
LmxM.05	MF_V1	SLAS	384649	384650	.	-	.	ID=LmxM.05.1040_SLAS_1;Promastigote=6;Intracellular_Amastigote=1;Axenic_Amastigote=2;
LmxM.05	MF_V1	SLAS	385924	385925	.	+	.	ID=LmxM.05.1050_SLAS_1;Promastigote=56;Intracellular_Amastigote=21;Axenic_Amastigote=61;
LmxM.05	MF_V1	SLAS	385986	385987	.	+	.	ID=LmxM.05.1050_SLAS_2;Promastigote=17;Intracellular_Amastigote=4;Axenic_Amastigote=13;
LmxM.05	MF_V1	SLAS	388151	388152	.	+	.	ID=LmxM.05.1060_SLAS_1;Promastigote=135;Intracellular_Amastigote=26;Axenic_Amastigote=276;
LmxM.05	MF_V1	SLAS	390390	390391	.	+	.	ID=LmxM.05.1061_SLAS_1;Promastigote=3;Intracellular_Amastigote=6;Axenic_Amastigote=3;
LmxM.05	MF_V1	SLAS	392618	392619	.	+	.	ID=LmxM.05.1070_SLAS_1;Promastigote=5;Intracellular_Amastigote=5;Axenic_Amastigote=4;
LmxM.05	MF_V1	SLAS	395507	395508	.	+	.	ID=LmxM.05.1080_SLAS_1;Promastigote=78;Intracellular_Amastigote=14;Axenic_Amastigote=40;
LmxM.05	MF_V1	SLAS	395574	395575	.	+	.	ID=LmxM.05.1080_SLAS_2;Promastigote=11;Intracellular_Amastigote=0;Axenic_Amastigote=6;
LmxM.05	MF_V1	SLAS	398899	398900	.	+	.	ID=LmxM.05_399275_SLAS_1;Promastigote=83;Intracellular_Amastigote=34;Axenic_Amastigote=147;
LmxM.05	MF_V1	SLAS	400289	400290	.	+	.	ID=LmxM.05.1090_SLAS_1;Promastigote=23;Intracellular_Amastigote=8;Axenic_Amastigote=20;
LmxM.05	MF_V1	SLAS	404816	404817	.	+	.	ID=LmxM.05.1100_SLAS_1;Promastigote=75;Intracellular_Amastigote=16;Axenic_Amastigote=49;
LmxM.05	MF_V1	SLAS	404836	404837	.	+	.	ID=LmxM.05.1100_SLAS_2;Promastigote=16;Intracellular_Amastigote=4;Axenic_Amastigote=12;
LmxM.05	MF_V1	SLAS	404841	404842	.	+	.	ID=LmxM.05.1100_SLAS_3;Promastigote=8;Intracellular_Amastigote=3;Axenic_Amastigote=3;
LmxM.05	MF_V1	SLAS	406856	406857	.	+	.	ID=LmxM.05.1110_SLAS_1;Promastigote=1167;Intracellular_Amastigote=111;Axenic_Amastigote=1144;
LmxM.05	MF_V1	SLAS	406864	406865	.	+	.	ID=LmxM.05.1110_SLAS_2;Promastigote=119;Intracellular_Amastigote=9;Axenic_Amastigote=187;
LmxM.05	MF_V1	SLAS	414145	414146	.	+	.	ID=LmxM.05_414407_SLAS_1;Promastigote=13;Intracellular_Amastigote=3;Axenic_Amastigote=12;
LmxM.05	MF_V1	SLAS	416088	416089	.	+	.	ID=LmxM.05.1120_SLAS_1;Promastigote=24;Intracellular_Amastigote=63;Axenic_Amastigote=94;
LmxM.05	MF_V1	SLAS	421001	421002	.	-	.	ID=LmxM.05.1130_SLAS_3;Promastigote=7;Intracellular_Amastigote=13;Axenic_Amastigote=13;
LmxM.05	MF_V1	SLAS	421029	421030	.	-	.	ID=LmxM.05.1130_SLAS_2;Promastigote=1;Intracellular_Amastigote=2;Axenic_Amastigote=6;
LmxM.05	MF_V1	SLAS	421054	421055	.	-	.	ID=LmxM.05.1130_SLAS_1;Promastigote=61;Intracellular_Amastigote=54;Axenic_Amastigote=87;
LmxM.05	MF_V1	SLAS	422946	422947	.	-	.	ID=LmxM.05.1140_SLAS_1;Promastigote=116;Intracellular_Amastigote=42;Axenic_Amastigote=151;
LmxM.05	MF_V1	SLAS	426385	426386	.	-	.	ID=LmxM.05.1160_SLAS_1;Promastigote=57;Intracellular_Amastigote=11;Axenic_Amastigote=116;
LmxM.05	MF_V1	SLAS	427417	427418	.	-	.	ID=LmxM.05_426918_SLAS_4;Promastigote=11;Intracellular_Amastigote=7;Axenic_Amastigote=13;
LmxM.05	MF_V1	SLAS	427429	427430	.	-	.	ID=LmxM.05_426918_SLAS_3;Promastigote=98;Intracellular_Amastigote=80;Axenic_Amastigote=139;
LmxM.05	MF_V1	SLAS	427530	427531	.	-	.	ID=LmxM.05_426918_SLAS_2;Promastigote=15;Intracellular_Amastigote=101;Axenic_Amastigote=53;
LmxM.05	MF_V1	SLAS	427541	427542	.	-	.	ID=LmxM.05_426918_SLAS_1;Promastigote=3;Intracellular_Amastigote=6;Axenic_Amastigote=2;
LmxM.05	MF_V1	SLAS	429126	429127	.	-	.	ID=LmxM.05.1170_SLAS_3;Promastigote=4;Intracellular_Amastigote=3;Axenic_Amastigote=4;
LmxM.05	MF_V1	SLAS	429166	429167	.	-	.	ID=LmxM.05.1170_SLAS_2;Promastigote=24;Intracellular_Amastigote=25;Axenic_Amastigote=25;
LmxM.05	MF_V1	SLAS	429193	429194	.	-	.	ID=LmxM.05.1170_SLAS_1;Promastigote=50;Intracellular_Amastigote=9;Axenic_Amastigote=61;
LmxM.05	MF_V1	SLAS	431430	431431	.	-	.	ID=LmxM.05.1180_SLAS_1;Promastigote=158;Intracellular_Amastigote=111;Axenic_Amastigote=224;
LmxM.05	MF_V1	SLAS	438418	438419	.	-	.	ID=LmxM.05.1190_SLAS_1;Promastigote=10;Intracellular_Amastigote=13;Axenic_Amastigote=23;
LmxM.05	MF_V1	SLAS	439242	439243	.	-	.	ID=LmxM.05.1200_SLAS_1;Promastigote=352;Intracellular_Amastigote=62;Axenic_Amastigote=403;
LmxM.05	MF_V1	SLAS	441344	441345	.	-	.	ID=LmxM.05.1210_SLAS_2;Promastigote=27;Intracellular_Amastigote=10;Axenic_Amastigote=33;
LmxM.05	MF_V1	SLAS	441375	441376	.	-	.	ID=LmxM.05.1210_SLAS_1;Promastigote=76;Intracellular_Amastigote=67;Axenic_Amastigote=52;
LmxM.05	MF_V1	SLAS	443524	443525	.	+	.	ID=LmxM.05.1215_SLAS_1;Promastigote=4;Intracellular_Amastigote=2;Axenic_Amastigote=5;
LmxM.06	MF_V1	SLAS	1552	1553	.	-	.	ID=LmxM.06_1380_SLAS_1;Promastigote=1;Intracellular_Amastigote=4;Axenic_Amastigote=7;
LmxM.06	MF_V1	SLAS	4302	4303	.	-	.	ID=LmxM.06.0010_SLAS_5;Promastigote=4;Intracellular_Amastigote=1;Axenic_Amastigote=7;
LmxM.06	MF_V1	SLAS	4363	4364	.	-	.	ID=LmxM.06.0010_SLAS_4;Promastigote=7;Intracellular_Amastigote=7;Axenic_Amastigote=16;
LmxM.06	MF_V1	SLAS	4389	4390	.	-	.	ID=LmxM.06.0010_SLAS_3;Promastigote=598;Intracellular_Amastigote=212;Axenic_Amastigote=724;
LmxM.06	MF_V1	SLAS	5561	5562	.	-	.	ID=LmxM.06.0010_SLAS_2;Promastigote=1;Intracellular_Amastigote=1;Axenic_Amastigote=7;
LmxM.06	MF_V1	SLAS	6184	6185	.	-	.	ID=LmxM.06.0010_SLAS_1;Promastigote=6;Intracellular_Amastigote=21;Axenic_Amastigote=26;
LmxM.06	MF_V1	SLAS	8100	8101	.	-	.	ID=LmxM.06.0020_SLAS_3;Promastigote=0;Intracellular_Amastigote=3;Axenic_Amastigote=7;
LmxM.06	MF_V1	SLAS	8134	8135	.	-	.	ID=LmxM.06.0020_SLAS_2;Promastigote=19;Intracellular_Amastigote=56;Axenic_Amastigote=56;
LmxM.06	MF_V1	SLAS	8216	8217	.	-	.	ID=LmxM.06.0020_SLAS_1;Promastigote=6;Intracellular_Amastigote=19;Axenic_Amastigote=12;
LmxM.06	MF_V1	SLAS	9663	9664	.	-	.	ID=LmxM.06_9341_SLAS_3;Promastigote=19;Intracellular_Amastigote=17;Axenic_Amastigote=36;
LmxM.06	MF_V1	SLAS	9697	9698	.	-	.	ID=LmxM.06_9341_SLAS_2;Promastigote=15;Intracellular_Amastigote=2;Axenic_Amastigote=19;
LmxM.06	MF_V1	SLAS	9699	9700	.	-	.	ID=LmxM.06_9341_SLAS_1;Promastigote=67;Intracellular_Amastigote=17;Axenic_Amastigote=101;
LmxM.06	MF_V1	SLAS	15972	15973	.	-	.	ID=LmxM.06.0030_SLAS_2;Promastigote=7;Intracellular_Amastigote=3;Axenic_Amastigote=12;
LmxM.06	MF_V1	SLAS	15991	15992	.	-	.	ID=LmxM.06.0030_SLAS_1;Promastigote=178;Intracellular_Amastigote=107;Axenic_Amastigote=296;
LmxM.06	MF_V1	SLAS	17509	17510	.	-	.	ID=LmxM.06.0040_SLAS_4;Promastigote=24;Intracellular_Amastigote=11;Axenic_Amastigote=26;
LmxM.06	MF_V1	SLAS	17517	17518	.	-	.	ID=LmxM.06.0040_SLAS_3;Promastigote=171;Intracellular_Amastigote=77;Axenic_Amastigote=169;
LmxM.06	MF_V1	SLAS	17576	17577	.	-	.	ID=LmxM.06.0040_SLAS_2;Promastigote=19;Intracellular_Amastigote=14;Axenic_Amastigote=36;
LmxM.06	MF_V1	SLAS	17851	17852	.	-	.	ID=LmxM.06.0040_SLAS_1;Promastigote=3;Intracellular_Amastigote=1;Axenic_Amastigote=6;
LmxM.06	MF_V1	SLAS	18887	18888	.	-	.	ID=LmxM.06_18579_SLAS_4;Promastigote=4;Intracellular_Amastigote=3;Axenic_Amastigote=9;
LmxM.06	MF_V1	SLAS	18917	18918	.	-	.	ID=LmxM.06_18579_SLAS_3;Promastigote=164;Intracellular_Amastigote=48;Axenic_Amastigote=149;
LmxM.06	MF_V1	SLAS	19928	19929	.	-	.	ID=LmxM.06_18579_SLAS_2;Promastigote=1;Intracellular_Amastigote=14;Axenic_Amastigote=5;
LmxM.06	MF_V1	SLAS	22494	22495	.	-	.	ID=LmxM.06_18579_SLAS_1;Promastigote=5;Intracellular_Amastigote=1;Axenic_Amastigote=3;
LmxM.06	MF_V1	SLAS	25599	25600	.	-	.	ID=LmxM.06.0050_SLAS_2;Promastigote=4;Intracellular_Amastigote=12;Axenic_Amastigote=8;
LmxM.06	MF_V1	SLAS	25607	25608	.	-	.	ID=LmxM.06.0050_SLAS_1;Promastigote=87;Intracellular_Amastigote=88;Axenic_Amastigote=110;
LmxM.06	MF_V1	SLAS	27344	27345	.	-	.	ID=LmxM.06_27195_SLAS_2;Promastigote=1;Intracellular_Amastigote=7;Axenic_Amastigote=8;
LmxM.06	MF_V1	SLAS	27347	27348	.	-	.	ID=LmxM.06_27195_SLAS_1;Promastigote=8;Intracellular_Amastigote=20;Axenic_Amastigote=37;
LmxM.06	MF_V1	SLAS	29399	29400	.	-	.	ID=LmxM.06.0060_SLAS_3;Promastigote=2;Intracellular_Amastigote=10;Axenic_Amastigote=11;
LmxM.06	MF_V1	SLAS	29718	29719	.	-	.	ID=LmxM.06.0060_SLAS_2;Promastigote=65;Intracellular_Amastigote=20;Axenic_Amastigote=41;
LmxM.06	MF_V1	SLAS	29730	29731	.	-	.	ID=LmxM.06.0060_SLAS_1;Promastigote=4;Intracellular_Amastigote=4;Axenic_Amastigote=1;
LmxM.06	MF_V1	SLAS	30100	30101	.	-	.	ID=LmxM.06_29862_SLAS_1;Promastigote=20;Intracellular_Amastigote=96;Axenic_Amastigote=81;
LmxM.06	MF_V1	SLAS	32275	32276	.	-	.	ID=LmxM.06.0070_SLAS_2;Promastigote=46;Intracellular_Amastigote=14;Axenic_Amastigote=110;
LmxM.06	MF_V1	SLAS	32285	32286	.	-	.	ID=LmxM.06.0070_SLAS_1;Promastigote=1016;Intracellular_Amastigote=59;Axenic_Amastigote=891;
LmxM.06	MF_V1	SLAS	37756	37757	.	-	.	ID=LmxM.06.0080_SLAS_3;Promastigote=3;Intracellular_Amastigote=7;Axenic_Amastigote=11;
LmxM.06	MF_V1	SLAS	37770	37771	.	-	.	ID=LmxM.06.0080_SLAS_2;Promastigote=35;Intracellular_Amastigote=121;Axenic_Amastigote=121;
LmxM.06	MF_V1	SLAS	37790	37791	.	-	.	ID=LmxM.06.0080_SLAS_1;Promastigote=107;Intracellular_Amastigote=200;Axenic_Amastigote=318;
LmxM.06	MF_V1	SLAS	43781	43782	.	-	.	ID=LmxM.06.0090_SLAS_1;Promastigote=12;Intracellular_Amastigote=8;Axenic_Amastigote=15;
LmxM.06	MF_V1	SLAS	45501	45502	.	-	.	ID=LmxM.06.0100_SLAS_1;Promastigote=52;Intracellular_Amastigote=24;Axenic_Amastigote=82;
LmxM.06	MF_V1	SLAS	48546	48547	.	-	.	ID=LmxM.06.0110_SLAS_4;Promastigote=18;Intracellular_Amastigote=9;Axenic_Amastigote=30;
LmxM.06	MF_V1	SLAS	48592	48593	.	-	.	ID=LmxM.06.0110_SLAS_3;Promastigote=54;Intracellular_Amastigote=19;Axenic_Amastigote=64;
LmxM.06	MF_V1	SLAS	48595	48596	.	-	.	ID=LmxM.06.0110_SLAS_2;Promastigote=253;Intracellular_Amastigote=70;Axenic_Amastigote=317;
LmxM.06	MF_V1	SLAS	48688	48689	.	-	.	ID=LmxM.06.0110_SLAS_1;Promastigote=36;Intracellular_Amastigote=6;Axenic_Amastigote=26;
LmxM.06	MF_V1	SLAS	50314	50315	.	-	.	ID=LmxM.06.0120_SLAS_3;Promastigote=22;Intracellular_Amastigote=19;Axenic_Amastigote=23;
LmxM.06	MF_V1	SLAS	50330	50331	.	-	.	ID=LmxM.06.0120_SLAS_2;Promastigote=3026;Intracellular_Amastigote=866;Axenic_Amastigote=4474;
LmxM.06	MF_V1	SLAS	50350	50351	.	-	.	ID=LmxM.06.0120_SLAS_1;Promastigote=22;Intracellular_Amastigote=9;Axenic_Amastigote=12;
LmxM.06	MF_V1	SLAS	51716	51717	.	-	.	ID=LmxM.06.0130_SLAS_3;Promastigote=5;Intracellular_Amastigote=3;Axenic_Amastigote=7;
LmxM.06	MF_V1	SLAS	51925	51926	.	-	.	ID=LmxM.06.0130_SLAS_2;Promastigote=6;Intracellular_Amastigote=1;Axenic_Amastigote=12;
LmxM.06	MF_V1	SLAS	51970	51971	.	-	.	ID=LmxM.06.0130_SLAS_1;Promastigote=81;Intracellular_Amastigote=44;Axenic_Amastigote=52;
LmxM.06	MF_V1	SLAS	53909	53910	.	-	.	ID=LmxM.06.0140_SLAS_6;Promastigote=7;Intracellular_Amastigote=0;Axenic_Amastigote=7;
LmxM.06	MF_V1	SLAS	53932	53933	.	-	.	ID=LmxM.06.0140_SLAS_5;Promastigote=113;Intracellular_Amastigote=74;Axenic_Amastigote=237;
LmxM.06	MF_V1	SLAS	53963	53964	.	-	.	ID=LmxM.06.0140_SLAS_4;Promastigote=10;Intracellular_Amastigote=2;Axenic_Amastigote=8;
LmxM.06	MF_V1	SLAS	54034	54035	.	-	.	ID=LmxM.06.0140_SLAS_3;Promastigote=4;Intracellular_Amastigote=3;Axenic_Amastigote=5;
LmxM.06	MF_V1	SLAS	54063	54064	.	-	.	ID=LmxM.06.0140_SLAS_2;Promastigote=43;Intracellular_Amastigote=16;Axenic_Amastigote=24;
LmxM.06	MF_V1	SLAS	54093	54094	.	-	.	ID=LmxM.06.0140_SLAS_1;Promastigote=3641;Intracellular_Amastigote=562;Axenic_Amastigote=1623;
LmxM.06	MF_V1	SLAS	54940	54941	.	-	.	ID=LmxM.06.0150_SLAS_2;Promastigote=8;Intracellular_Amastigote=9;Axenic_Amastigote=12;
LmxM.06	MF_V1	SLAS	54982	54983	.	-	.	ID=LmxM.06.0150_SLAS_1;Promastigote=51;Intracellular_Amastigote=62;Axenic_Amastigote=122;
LmxM.06	MF_V1	SLAS	57332	57333	.	-	.	ID=LmxM.06.0160_SLAS_4;Promastigote=3;Intracellular_Amastigote=3;Axenic_Amastigote=7;
LmxM.06	MF_V1	SLAS	57338	57339	.	-	.	ID=LmxM.06.0160_SLAS_3;Promastigote=18;Intracellular_Amastigote=15;Axenic_Amastigote=13;
LmxM.06	MF_V1	SLAS	57372	57373	.	-	.	ID=LmxM.06.0160_SLAS_2;Promastigote=6;Intracellular_Amastigote=2;Axenic_Amastigote=1;
LmxM.06	MF_V1	SLAS	57394	57395	.	-	.	ID=LmxM.06.0160_SLAS_1;Promastigote=50;Intracellular_Amastigote=72;Axenic_Amastigote=75;
LmxM.06	MF_V1	SLAS	58723	58724	.	-	.	ID=LmxM.06.0170_SLAS_2;Promastigote=16;Intracellular_Amastigote=5;Axenic_Amastigote=20;
LmxM.06	MF_V1	SLAS	58749	58750	.	-	.	ID=LmxM.06.0170_SLAS_1;Promastigote=107;Intracellular_Amastigote=96;Axenic_Amastigote=167;
LmxM.06	MF_V1	SLAS	61827	61828	.	-	.	ID=LmxM.06.0180_SLAS_2;Promastigote=43;Intracellular_Amastigote=87;Axenic_Amastigote=95;
LmxM.06	MF_V1	SLAS	61843	61844	.	-	.	ID=LmxM.06.0180_SLAS_1;Promastigote=0;Intracellular_Amastigote=5;Axenic_Amastigote=6;
LmxM.06	MF_V1	SLAS	65035	65036	.	-	.	ID=LmxM.06.0190_SLAS_3;Promastigote=10;Intracellular_Amastigote=4;Axenic_Amastigote=9;
LmxM.06	MF_V1	SLAS	65117	65118	.	-	.	ID=LmxM.06.0190_SLAS_2;Promastigote=203;Intracellular_Amastigote=132;Axenic_Amastigote=156;
LmxM.06	MF_V1	SLAS	65227	65228	.	-	.	ID=LmxM.06.0190_SLAS_1;Promastigote=13;Intracellular_Amastigote=3;Axenic_Amastigote=10;
LmxM.06	MF_V1	SLAS	67974	67975	.	-	.	ID=LmxM.06.0200_SLAS_1;Promastigote=144;Intracellular_Amastigote=50;Axenic_Amastigote=135;
LmxM.06	MF_V1	SLAS	69000	69001	.	-	.	ID=LmxM.06_68747_SLAS_2;Promastigote=187;Intracellular_Amastigote=64;Axenic_Amastigote=193;
LmxM.06	MF_V1	SLAS	69057	69058	.	-	.	ID=LmxM.06_68747_SLAS_1;Promastigote=10;Intracellular_Amastigote=8;Axenic_Amastigote=38;
LmxM.06	MF_V1	SLAS	69579	69580	.	-	.	ID=LmxM.06_69456_SLAS_1;Promastigote=2;Intracellular_Amastigote=5;Axenic_Amastigote=6;
LmxM.06	MF_V1	SLAS	72615	72616	.	-	.	ID=LmxM.06.0210_SLAS_3;Promastigote=12;Intracellular_Amastigote=1;Axenic_Amastigote=19;
LmxM.06	MF_V1	SLAS	72629	72630	.	-	.	ID=LmxM.06.0210_SLAS_2;Promastigote=94;Intracellular_Amastigote=51;Axenic_Amastigote=102;
LmxM.06	MF_V1	SLAS	72634	72635	.	-	.	ID=LmxM.06.0210_SLAS_1;Promastigote=535;Intracellular_Amastigote=225;Axenic_Amastigote=368;
LmxM.06	MF_V1	SLAS	74130	74131	.	-	.	ID=LmxM.06.0220_SLAS_2;Promastigote=9;Intracellular_Amastigote=3;Axenic_Amastigote=6;
LmxM.06	MF_V1	SLAS	74137	74138	.	-	.	ID=LmxM.06.0220_SLAS_1;Promastigote=31;Intracellular_Amastigote=6;Axenic_Amastigote=31;
LmxM.06	MF_V1	SLAS	75541	75542	.	-	.	ID=LmxM.06.0230_SLAS_2;Promastigote=14;Intracellular_Amastigote=1;Axenic_Amastigote=34;
LmxM.06	MF_V1	SLAS	75565	75566	.	-	.	ID=LmxM.06.0230_SLAS_1;Promastigote=5397;Intracellular_Amastigote=1338;Axenic_Amastigote=5112;
LmxM.06	MF_V1	SLAS	79534	79535	.	-	.	ID=LmxM.06.0240_SLAS_2;Promastigote=68;Intracellular_Amastigote=9;Axenic_Amastigote=51;
LmxM.06	MF_V1	SLAS	79540	79541	.	-	.	ID=LmxM.06.0240_SLAS_1;Promastigote=1324;Intracellular_Amastigote=466;Axenic_Amastigote=1933;
LmxM.06	MF_V1	SLAS	81429	81430	.	-	.	ID=LmxM.06.0250_SLAS_4;Promastigote=2;Intracellular_Amastigote=2;Axenic_Amastigote=10;
LmxM.06	MF_V1	SLAS	81460	81461	.	-	.	ID=LmxM.06.0250_SLAS_3;Promastigote=136;Intracellular_Amastigote=98;Axenic_Amastigote=189;
LmxM.06	MF_V1	SLAS	81631	81632	.	-	.	ID=LmxM.06.0250_SLAS_2;Promastigote=4;Intracellular_Amastigote=5;Axenic_Amastigote=12;
LmxM.06	MF_V1	SLAS	81645	81646	.	-	.	ID=LmxM.06.0250_SLAS_1;Promastigote=16;Intracellular_Amastigote=21;Axenic_Amastigote=21;
LmxM.06	MF_V1	SLAS	88400	88401	.	-	.	ID=LmxM.06.0260_SLAS_3;Promastigote=31;Intracellular_Amastigote=11;Axenic_Amastigote=44;
LmxM.06	MF_V1	SLAS	88478	88479	.	-	.	ID=LmxM.06.0260_SLAS_2;Promastigote=40;Intracellular_Amastigote=9;Axenic_Amastigote=39;
LmxM.06	MF_V1	SLAS	88696	88697	.	-	.	ID=LmxM.06.0260_SLAS_1;Promastigote=36;Intracellular_Amastigote=9;Axenic_Amastigote=32;
LmxM.06	MF_V1	SLAS	90943	90944	.	-	.	ID=LmxM.06.0270_SLAS_2;Promastigote=15;Intracellular_Amastigote=5;Axenic_Amastigote=18;
LmxM.06	MF_V1	SLAS	91017	91018	.	-	.	ID=LmxM.06.0270_SLAS_1;Promastigote=101;Intracellular_Amastigote=47;Axenic_Amastigote=77;
LmxM.06	MF_V1	SLAS	94294	94295	.	-	.	ID=LmxM.06.0280_SLAS_2;Promastigote=3;Intracellular_Amastigote=2;Axenic_Amastigote=8;
LmxM.06	MF_V1	SLAS	94346	94347	.	-	.	ID=LmxM.06.0280_SLAS_1;Promastigote=892;Intracellular_Amastigote=292;Axenic_Amastigote=842;
LmxM.06	MF_V1	SLAS	95777	95778	.	-	.	ID=LmxM.06_94775_SLAS_1;Promastigote=15;Intracellular_Amastigote=15;Axenic_Amastigote=16;
LmxM.06	MF_V1	SLAS	98146	98147	.	-	.	ID=LmxM.06.0290_SLAS_2;Promastigote=196;Intracellular_Amastigote=105;Axenic_Amastigote=392;
LmxM.06	MF_V1	SLAS	98172	98173	.	-	.	ID=LmxM.06.0290_SLAS_1;Promastigote=32;Intracellular_Amastigote=1;Axenic_Amastigote=14;
LmxM.06	MF_V1	SLAS	99758	99759	.	-	.	ID=LmxM.06.0300_SLAS_1;Promastigote=47;Intracellular_Amastigote=96;Axenic_Amastigote=170;
LmxM.06	MF_V1	SLAS	101850	101851	.	-	.	ID=LmxM.06_101525_SLAS_1;Promastigote=7;Intracellular_Amastigote=8;Axenic_Amastigote=6;
LmxM.06	MF_V1	SLAS	105081	105082	.	-	.	ID=LmxM.06.0310_SLAS_1;Promastigote=61;Intracellular_Amastigote=30;Axenic_Amastigote=86;
LmxM.06	MF_V1	SLAS	108996	108997	.	-	.	ID=LmxM.06.0320_SLAS_2;Promastigote=4;Intracellular_Amastigote=2;Axenic_Amastigote=3;
LmxM.06	MF_V1	SLAS	109361	109362	.	-	.	ID=LmxM.06.0320_SLAS_1;Promastigote=301;Intracellular_Amastigote=73;Axenic_Amastigote=242;
LmxM.06	MF_V1	SLAS	109853	109854	.	-	.	ID=LmxM.06_109552_SLAS_2;Promastigote=6;Intracellular_Amastigote=4;Axenic_Amastigote=8;
LmxM.06	MF_V1	SLAS	109872	109873	.	-	.	ID=LmxM.06_109552_SLAS_1;Promastigote=95;Intracellular_Amastigote=32;Axenic_Amastigote=113;
LmxM.06	MF_V1	SLAS	114064	114065	.	-	.	ID=LmxM.06.0330_SLAS_1;Promastigote=42;Intracellular_Amastigote=12;Axenic_Amastigote=66;
LmxM.06	MF_V1	SLAS	117469	117470	.	-	.	ID=LmxM.06.0340_SLAS_1;Promastigote=92;Intracellular_Amastigote=16;Axenic_Amastigote=76;
LmxM.06	MF_V1	SLAS	119489	119490	.	-	.	ID=LmxM.06.0350_SLAS_2;Promastigote=7;Intracellular_Amastigote=4;Axenic_Amastigote=8;
LmxM.06	MF_V1	SLAS	119506	119507	.	-	.	ID=LmxM.06.0350_SLAS_1;Promastigote=59;Intracellular_Amastigote=28;Axenic_Amastigote=53;
LmxM.06	MF_V1	SLAS	121262	121263	.	-	.	ID=LmxM.06.0360_SLAS_3;Promastigote=1;Intracellular_Amastigote=4;Axenic_Amastigote=10;
LmxM.06	MF_V1	SLAS	121268	121269	.	-	.	ID=LmxM.06.0360_SLAS_2;Promastigote=20;Intracellular_Amastigote=10;Axenic_Amastigote=25;
LmxM.06	MF_V1	SLAS	121294	121295	.	-	.	ID=LmxM.06.0360_SLAS_1;Promastigote=22;Intracellular_Amastigote=52;Axenic_Amastigote=54;
LmxM.06	MF_V1	SLAS	125786	125787	.	+	.	ID=LmxM.06.0370_SLAS_1;Promastigote=2948;Intracellular_Amastigote=2464;Axenic_Amastigote=3371;
LmxM.06	MF_V1	SLAS	125789	125790	.	+	.	ID=LmxM.06.0370_SLAS_2;Promastigote=869;Intracellular_Amastigote=768;Axenic_Amastigote=1283;
LmxM.06	MF_V1	SLAS	125796	125797	.	+	.	ID=LmxM.06.0370_SLAS_3;Promastigote=144;Intracellular_Amastigote=82;Axenic_Amastigote=170;
LmxM.06	MF_V1	SLAS	125809	125810	.	+	.	ID=LmxM.06.0370_SLAS_4;Promastigote=55;Intracellular_Amastigote=56;Axenic_Amastigote=112;
LmxM.06	MF_V1	SLAS	127904	127905	.	+	.	ID=LmxM.06.0380_SLAS_1;Promastigote=8;Intracellular_Amastigote=25;Axenic_Amastigote=29;
LmxM.06	MF_V1	SLAS	127915	127916	.	+	.	ID=LmxM.06.0380_SLAS_2;Promastigote=1;Intracellular_Amastigote=7;Axenic_Amastigote=10;
LmxM.06	MF_V1	SLAS	129321	129322	.	+	.	ID=LmxM.06_129660_SLAS_1;Promastigote=182;Intracellular_Amastigote=99;Axenic_Amastigote=259;
LmxM.06	MF_V1	SLAS	129330	129331	.	+	.	ID=LmxM.06_129660_SLAS_2;Promastigote=25;Intracellular_Amastigote=13;Axenic_Amastigote=55;
LmxM.06	MF_V1	SLAS	129932	129933	.	+	.	ID=LmxM.06.0390_SLAS_1;Promastigote=35;Intracellular_Amastigote=31;Axenic_Amastigote=62;
LmxM.06	MF_V1	SLAS	129957	129958	.	+	.	ID=LmxM.06.0390_SLAS_2;Promastigote=0;Intracellular_Amastigote=3;Axenic_Amastigote=8;
LmxM.06	MF_V1	SLAS	133042	133043	.	+	.	ID=LmxM.06.0400_SLAS_1;Promastigote=51;Intracellular_Amastigote=35;Axenic_Amastigote=94;
LmxM.06	MF_V1	SLAS	133049	133050	.	+	.	ID=LmxM.06.0400_SLAS_2;Promastigote=14;Intracellular_Amastigote=8;Axenic_Amastigote=22;
LmxM.06	MF_V1	SLAS	135988	135989	.	+	.	ID=LmxM.06.0410_SLAS_1;Promastigote=609;Intracellular_Amastigote=727;Axenic_Amastigote=814;
LmxM.06	MF_V1	SLAS	135995	135996	.	+	.	ID=LmxM.06.0410_SLAS_2;Promastigote=12;Intracellular_Amastigote=21;Axenic_Amastigote=22;
LmxM.06	MF_V1	SLAS	135998	135999	.	+	.	ID=LmxM.06.0410_SLAS_3;Promastigote=17;Intracellular_Amastigote=17;Axenic_Amastigote=28;
LmxM.06	MF_V1	SLAS	137724	137725	.	+	.	ID=LmxM.06.0412_SLAS_1;Promastigote=891;Intracellular_Amastigote=191;Axenic_Amastigote=630;
LmxM.06	MF_V1	SLAS	137742	137743	.	+	.	ID=LmxM.06.0412_SLAS_2;Promastigote=50;Intracellular_Amastigote=13;Axenic_Amastigote=56;
LmxM.06	MF_V1	SLAS	137745	137746	.	+	.	ID=LmxM.06.0412_SLAS_3;Promastigote=8;Intracellular_Amastigote=4;Axenic_Amastigote=11;
LmxM.06	MF_V1	SLAS	139304	139305	.	+	.	ID=LmxM.06.0415_SLAS_1;Promastigote=17;Intracellular_Amastigote=3;Axenic_Amastigote=11;
LmxM.06	MF_V1	SLAS	139361	139362	.	+	.	ID=LmxM.06.0415_SLAS_2;Promastigote=0;Intracellular_Amastigote=8;Axenic_Amastigote=5;
LmxM.06	MF_V1	SLAS	139387	139388	.	+	.	ID=LmxM.06.0415_SLAS_3;Promastigote=5;Intracellular_Amastigote=7;Axenic_Amastigote=2;
LmxM.06	MF_V1	SLAS	139445	139446	.	+	.	ID=LmxM.06.0415_SLAS_4;Promastigote=241;Intracellular_Amastigote=266;Axenic_Amastigote=343;
LmxM.06	MF_V1	SLAS	139448	139449	.	+	.	ID=LmxM.06.0415_SLAS_5;Promastigote=20;Intracellular_Amastigote=17;Axenic_Amastigote=23;
LmxM.06	MF_V1	SLAS	139484	139485	.	+	.	ID=LmxM.06.0415_SLAS_6;Promastigote=30;Intracellular_Amastigote=4;Axenic_Amastigote=31;
LmxM.06	MF_V1	SLAS	141216	141217	.	+	.	ID=LmxM.06.0420_SLAS_1;Promastigote=2;Intracellular_Amastigote=2;Axenic_Amastigote=6;
LmxM.06	MF_V1	SLAS	141263	141264	.	+	.	ID=LmxM.06.0420_SLAS_2;Promastigote=51;Intracellular_Amastigote=74;Axenic_Amastigote=157;
LmxM.06	MF_V1	SLAS	144780	144781	.	+	.	ID=LmxM.06.0430_SLAS_1;Promastigote=49;Intracellular_Amastigote=37;Axenic_Amastigote=91;
LmxM.06	MF_V1	SLAS	144797	144798	.	+	.	ID=LmxM.06.0430_SLAS_2;Promastigote=8;Intracellular_Amastigote=6;Axenic_Amastigote=14;
LmxM.06	MF_V1	SLAS	148761	148762	.	+	.	ID=LmxM.06.0440_SLAS_1;Promastigote=512;Intracellular_Amastigote=116;Axenic_Amastigote=205;
LmxM.06	MF_V1	SLAS	148790	148791	.	+	.	ID=LmxM.06.0440_SLAS_2;Promastigote=8;Intracellular_Amastigote=1;Axenic_Amastigote=6;
LmxM.06	MF_V1	SLAS	152559	152560	.	+	.	ID=LmxM.06_152779_SLAS_1;Promastigote=4;Intracellular_Amastigote=10;Axenic_Amastigote=3;
LmxM.06	MF_V1	SLAS	153504	153505	.	+	.	ID=LmxM.06.0450_SLAS_1;Promastigote=15;Intracellular_Amastigote=25;Axenic_Amastigote=27;
LmxM.06	MF_V1	SLAS	156598	156599	.	+	.	ID=LmxM.06.0460_SLAS_1;Promastigote=74;Intracellular_Amastigote=20;Axenic_Amastigote=91;
LmxM.06	MF_V1	SLAS	161899	161900	.	+	.	ID=LmxM.06.0470_SLAS_1;Promastigote=27;Intracellular_Amastigote=20;Axenic_Amastigote=24;
LmxM.06	MF_V1	SLAS	161932	161933	.	+	.	ID=LmxM.06.0470_SLAS_2;Promastigote=121;Intracellular_Amastigote=51;Axenic_Amastigote=140;
LmxM.06	MF_V1	SLAS	161945	161946	.	+	.	ID=LmxM.06.0470_SLAS_3;Promastigote=22;Intracellular_Amastigote=9;Axenic_Amastigote=32;
LmxM.06	MF_V1	SLAS	166547	166548	.	+	.	ID=LmxM.06.0480_SLAS_1;Promastigote=82;Intracellular_Amastigote=50;Axenic_Amastigote=52;
LmxM.06	MF_V1	SLAS	171339	171340	.	+	.	ID=LmxM.06.0500_SLAS_1;Promastigote=19;Intracellular_Amastigote=27;Axenic_Amastigote=33;
LmxM.06	MF_V1	SLAS	173599	173600	.	+	.	ID=LmxM.06.0510_SLAS_1;Promastigote=1036;Intracellular_Amastigote=230;Axenic_Amastigote=1005;
LmxM.06	MF_V1	SLAS	173642	173643	.	+	.	ID=LmxM.06.0510_SLAS_2;Promastigote=14;Intracellular_Amastigote=12;Axenic_Amastigote=18;
LmxM.06	MF_V1	SLAS	176386	176387	.	+	.	ID=LmxM.06.0520_SLAS_1;Promastigote=15;Intracellular_Amastigote=1;Axenic_Amastigote=5;
LmxM.06	MF_V1	SLAS	176418	176419	.	+	.	ID=LmxM.06.0520_SLAS_2;Promastigote=53;Intracellular_Amastigote=5;Axenic_Amastigote=99;
LmxM.06	MF_V1	SLAS	183307	183308	.	+	.	ID=LmxM.06.0530_SLAS_1;Promastigote=159;Intracellular_Amastigote=90;Axenic_Amastigote=91;
LmxM.06	MF_V1	SLAS	183311	183312	.	+	.	ID=LmxM.06.0530_SLAS_2;Promastigote=66;Intracellular_Amastigote=23;Axenic_Amastigote=30;
LmxM.06	MF_V1	SLAS	183334	183335	.	+	.	ID=LmxM.06.0530_SLAS_3;Promastigote=20;Intracellular_Amastigote=6;Axenic_Amastigote=18;
LmxM.06	MF_V1	SLAS	183340	183341	.	+	.	ID=LmxM.06.0530_SLAS_4;Promastigote=28;Intracellular_Amastigote=2;Axenic_Amastigote=13;
LmxM.06	MF_V1	SLAS	183371	183372	.	+	.	ID=LmxM.06.0530_SLAS_5;Promastigote=31;Intracellular_Amastigote=6;Axenic_Amastigote=53;
LmxM.06	MF_V1	SLAS	185785	185786	.	+	.	ID=LmxM.06.0540_SLAS_1;Promastigote=236;Intracellular_Amastigote=129;Axenic_Amastigote=379;
LmxM.06	MF_V1	SLAS	185788	185789	.	+	.	ID=LmxM.06.0540_SLAS_2;Promastigote=6;Intracellular_Amastigote=6;Axenic_Amastigote=22;
LmxM.06	MF_V1	SLAS	189040	189041	.	+	.	ID=LmxM.06.0550_SLAS_1;Promastigote=66;Intracellular_Amastigote=46;Axenic_Amastigote=75;
LmxM.06	MF_V1	SLAS	189043	189044	.	+	.	ID=LmxM.06.0550_SLAS_2;Promastigote=4;Intracellular_Amastigote=15;Axenic_Amastigote=8;
LmxM.06	MF_V1	SLAS	195471	195472	.	+	.	ID=LmxM.06.0560_SLAS_1;Promastigote=239;Intracellular_Amastigote=214;Axenic_Amastigote=216;
LmxM.06	MF_V1	SLAS	195478	195479	.	+	.	ID=LmxM.06.0560_SLAS_2;Promastigote=57;Intracellular_Amastigote=65;Axenic_Amastigote=72;
LmxM.06	MF_V1	SLAS	197658	197659	.	+	.	ID=LmxM.06.0570_SLAS_1;Promastigote=40;Intracellular_Amastigote=14;Axenic_Amastigote=25;
LmxM.06	MF_V1	SLAS	197675	197676	.	+	.	ID=LmxM.06.0570_SLAS_2;Promastigote=7;Intracellular_Amastigote=6;Axenic_Amastigote=7;
LmxM.06	MF_V1	SLAS	197720	197721	.	+	.	ID=LmxM.06.0570_SLAS_3;Promastigote=3881;Intracellular_Amastigote=1388;Axenic_Amastigote=6120;
LmxM.06	MF_V1	SLAS	198538	198539	.	+	.	ID=LmxM.06.0580_SLAS_1;Promastigote=20;Intracellular_Amastigote=9;Axenic_Amastigote=8;
LmxM.06	MF_V1	SLAS	198586	198587	.	+	.	ID=LmxM.06.0580_SLAS_2;Promastigote=64;Intracellular_Amastigote=31;Axenic_Amastigote=118;
LmxM.06	MF_V1	SLAS	198602	198603	.	+	.	ID=LmxM.06.0580_SLAS_3;Promastigote=3145;Intracellular_Amastigote=2106;Axenic_Amastigote=6580;
LmxM.06	MF_V1	SLAS	198608	198609	.	+	.	ID=LmxM.06.0580_SLAS_4;Promastigote=659;Intracellular_Amastigote=432;Axenic_Amastigote=1754;
LmxM.06	MF_V1	SLAS	199786	199787	.	+	.	ID=LmxM.06.0590_SLAS_1;Promastigote=220;Intracellular_Amastigote=171;Axenic_Amastigote=293;
LmxM.06	MF_V1	SLAS	199790	199791	.	+	.	ID=LmxM.06.0590_SLAS_2;Promastigote=75;Intracellular_Amastigote=72;Axenic_Amastigote=118;
LmxM.06	MF_V1	SLAS	205516	205517	.	+	.	ID=LmxM.06.0600_SLAS_1;Promastigote=23;Intracellular_Amastigote=48;Axenic_Amastigote=47;
LmxM.06	MF_V1	SLAS	205523	205524	.	+	.	ID=LmxM.06.0600_SLAS_2;Promastigote=6;Intracellular_Amastigote=3;Axenic_Amastigote=5;
LmxM.06	MF_V1	SLAS	210561	210562	.	+	.	ID=LmxM.06.0610_SLAS_1;Promastigote=110;Intracellular_Amastigote=20;Axenic_Amastigote=53;
LmxM.06	MF_V1	SLAS	210603	210604	.	+	.	ID=LmxM.06.0610_SLAS_2;Promastigote=474;Intracellular_Amastigote=372;Axenic_Amastigote=462;
LmxM.06	MF_V1	SLAS	210625	210626	.	+	.	ID=LmxM.06.0610_SLAS_3;Promastigote=59;Intracellular_Amastigote=63;Axenic_Amastigote=123;
LmxM.06	MF_V1	SLAS	217368	217369	.	+	.	ID=LmxM.06.0630_SLAS_1;Promastigote=124;Intracellular_Amastigote=100;Axenic_Amastigote=72;
LmxM.06	MF_V1	SLAS	217413	217414	.	+	.	ID=LmxM.06.0630_SLAS_2;Promastigote=3;Intracellular_Amastigote=4;Axenic_Amastigote=3;
LmxM.06	MF_V1	SLAS	217452	217453	.	+	.	ID=LmxM.06.0630_SLAS_3;Promastigote=2;Intracellular_Amastigote=2;Axenic_Amastigote=5;
LmxM.06	MF_V1	SLAS	217463	217464	.	+	.	ID=LmxM.06.0630_SLAS_4;Promastigote=3;Intracellular_Amastigote=4;Axenic_Amastigote=2;
LmxM.06	MF_V1	SLAS	217667	217668	.	+	.	ID=LmxM.06.0630_SLAS_5;Promastigote=17;Intracellular_Amastigote=31;Axenic_Amastigote=15;
LmxM.06	MF_V1	SLAS	217677	217678	.	+	.	ID=LmxM.06.0630_SLAS_6;Promastigote=6;Intracellular_Amastigote=6;Axenic_Amastigote=7;
LmxM.06	MF_V1	SLAS	219523	219524	.	+	.	ID=LmxM.06.0640_SLAS_1;Promastigote=205;Intracellular_Amastigote=42;Axenic_Amastigote=271;
LmxM.06	MF_V1	SLAS	230178	230179	.	+	.	ID=LmxM.06.0650_SLAS_1;Promastigote=1;Intracellular_Amastigote=1;Axenic_Amastigote=10;
LmxM.06	MF_V1	SLAS	230446	230447	.	+	.	ID=LmxM.06.0650_SLAS_2;Promastigote=38;Intracellular_Amastigote=12;Axenic_Amastigote=65;
LmxM.06	MF_V1	SLAS	235152	235153	.	+	.	ID=LmxM.06.0660_SLAS_1;Promastigote=3;Intracellular_Amastigote=1;Axenic_Amastigote=6;
LmxM.06	MF_V1	SLAS	235239	235240	.	+	.	ID=LmxM.06.0660_SLAS_2;Promastigote=75;Intracellular_Amastigote=76;Axenic_Amastigote=93;
LmxM.06	MF_V1	SLAS	238970	238971	.	+	.	ID=LmxM.06.0670_SLAS_1;Promastigote=8;Intracellular_Amastigote=9;Axenic_Amastigote=9;
LmxM.06	MF_V1	SLAS	239029	239030	.	+	.	ID=LmxM.06.0670_SLAS_2;Promastigote=70;Intracellular_Amastigote=48;Axenic_Amastigote=99;
LmxM.06	MF_V1	SLAS	239038	239039	.	+	.	ID=LmxM.06.0670_SLAS_3;Promastigote=8;Intracellular_Amastigote=0;Axenic_Amastigote=6;
LmxM.06	MF_V1	SLAS	239291	239292	.	+	.	ID=LmxM.06.0670_SLAS_4;Promastigote=5;Intracellular_Amastigote=2;Axenic_Amastigote=2;
LmxM.06	MF_V1	SLAS	245280	245281	.	+	.	ID=LmxM.06.0680_SLAS_1;Promastigote=43;Intracellular_Amastigote=6;Axenic_Amastigote=54;
LmxM.06	MF_V1	SLAS	246749	246750	.	+	.	ID=LmxM.06.0685_SLAS_1;Promastigote=96;Intracellular_Amastigote=23;Axenic_Amastigote=105;
LmxM.06	MF_V1	SLAS	246788	246789	.	+	.	ID=LmxM.06.0685_SLAS_2;Promastigote=32;Intracellular_Amastigote=27;Axenic_Amastigote=70;
LmxM.06	MF_V1	SLAS	248829	248830	.	+	.	ID=LmxM.06.0690_SLAS_1;Promastigote=30;Intracellular_Amastigote=19;Axenic_Amastigote=56;
LmxM.06	MF_V1	SLAS	248832	248833	.	+	.	ID=LmxM.06.0690_SLAS_2;Promastigote=3;Intracellular_Amastigote=3;Axenic_Amastigote=5;
LmxM.06	MF_V1	SLAS	257818	257819	.	+	.	ID=LmxM.06.0700_SLAS_1;Promastigote=1779;Intracellular_Amastigote=191;Axenic_Amastigote=1104;
LmxM.06	MF_V1	SLAS	264931	264932	.	+	.	ID=LmxM.06_265056_SLAS_1;Promastigote=6;Intracellular_Amastigote=26;Axenic_Amastigote=8;
LmxM.06	MF_V1	SLAS	265894	265895	.	+	.	ID=LmxM.06.0710_SLAS_1;Promastigote=531;Intracellular_Amastigote=388;Axenic_Amastigote=629;
LmxM.06	MF_V1	SLAS	265947	265948	.	+	.	ID=LmxM.06.0710_SLAS_2;Promastigote=3;Intracellular_Amastigote=2;Axenic_Amastigote=5;
LmxM.06	MF_V1	SLAS	268115	268116	.	+	.	ID=LmxM.06.0720_SLAS_1;Promastigote=209;Intracellular_Amastigote=304;Axenic_Amastigote=381;
LmxM.06	MF_V1	SLAS	274355	274356	.	+	.	ID=LmxM.06.0730_SLAS_1;Promastigote=403;Intracellular_Amastigote=41;Axenic_Amastigote=290;
LmxM.06	MF_V1	SLAS	274358	274359	.	+	.	ID=LmxM.06.0730_SLAS_2;Promastigote=61;Intracellular_Amastigote=7;Axenic_Amastigote=47;
LmxM.06	MF_V1	SLAS	274364	274365	.	+	.	ID=LmxM.06.0730_SLAS_3;Promastigote=4;Intracellular_Amastigote=3;Axenic_Amastigote=4;
LmxM.06	MF_V1	SLAS	274471	274472	.	+	.	ID=LmxM.06.0730_SLAS_4;Promastigote=12;Intracellular_Amastigote=8;Axenic_Amastigote=6;
LmxM.06	MF_V1	SLAS	276922	276923	.	+	.	ID=LmxM.06_277328_SLAS_1;Promastigote=19;Intracellular_Amastigote=80;Axenic_Amastigote=34;
LmxM.06	MF_V1	SLAS	276925	276926	.	+	.	ID=LmxM.06_277328_SLAS_2;Promastigote=2;Intracellular_Amastigote=18;Axenic_Amastigote=8;
LmxM.06	MF_V1	SLAS	278346	278347	.	+	.	ID=LmxM.06.0740_SLAS_1;Promastigote=46;Intracellular_Amastigote=43;Axenic_Amastigote=87;
LmxM.06	MF_V1	SLAS	281837	281838	.	+	.	ID=LmxM.06.0750_SLAS_1;Promastigote=14;Intracellular_Amastigote=6;Axenic_Amastigote=24;
LmxM.06	MF_V1	SLAS	281894	281895	.	+	.	ID=LmxM.06.0750_SLAS_2;Promastigote=41;Intracellular_Amastigote=35;Axenic_Amastigote=96;
LmxM.06	MF_V1	SLAS	284986	284987	.	+	.	ID=LmxM.06.0760_SLAS_1;Promastigote=16;Intracellular_Amastigote=15;Axenic_Amastigote=23;
LmxM.06	MF_V1	SLAS	284995	284996	.	+	.	ID=LmxM.06.0760_SLAS_2;Promastigote=16;Intracellular_Amastigote=15;Axenic_Amastigote=35;
LmxM.06	MF_V1	SLAS	285177	285178	.	+	.	ID=LmxM.06.0760_SLAS_3;Promastigote=22;Intracellular_Amastigote=22;Axenic_Amastigote=39;
LmxM.06	MF_V1	SLAS	285224	285225	.	+	.	ID=LmxM.06.0760_SLAS_4;Promastigote=34;Intracellular_Amastigote=23;Axenic_Amastigote=34;
LmxM.06	MF_V1	SLAS	285237	285238	.	+	.	ID=LmxM.06.0760_SLAS_5;Promastigote=20;Intracellular_Amastigote=5;Axenic_Amastigote=16;
LmxM.06	MF_V1	SLAS	285254	285255	.	+	.	ID=LmxM.06.0760_SLAS_6;Promastigote=6;Intracellular_Amastigote=3;Axenic_Amastigote=11;
LmxM.06	MF_V1	SLAS	299459	299460	.	+	.	ID=LmxM.06_299794_SLAS_1;Promastigote=269;Intracellular_Amastigote=166;Axenic_Amastigote=465;
LmxM.06	MF_V1	SLAS	299468	299469	.	+	.	ID=LmxM.06_299794_SLAS_2;Promastigote=3;Intracellular_Amastigote=3;Axenic_Amastigote=7;
LmxM.06	MF_V1	SLAS	302314	302315	.	+	.	ID=LmxM.06.0790_SLAS_1;Promastigote=64;Intracellular_Amastigote=10;Axenic_Amastigote=24;
LmxM.06	MF_V1	SLAS	302400	302401	.	+	.	ID=LmxM.06.0790_SLAS_2;Promastigote=26;Intracellular_Amastigote=25;Axenic_Amastigote=15;
LmxM.06	MF_V1	SLAS	302519	302520	.	+	.	ID=LmxM.06.0790_SLAS_3;Promastigote=7;Intracellular_Amastigote=18;Axenic_Amastigote=37;
LmxM.06	MF_V1	SLAS	312454	312455	.	+	.	ID=LmxM.06.0810_SLAS_1;Promastigote=135;Intracellular_Amastigote=39;Axenic_Amastigote=134;
LmxM.06	MF_V1	SLAS	312461	312462	.	+	.	ID=LmxM.06.0810_SLAS_2;Promastigote=5;Intracellular_Amastigote=1;Axenic_Amastigote=19;
LmxM.06	MF_V1	SLAS	324377	324378	.	+	.	ID=LmxM.06.0820_SLAS_1;Promastigote=42;Intracellular_Amastigote=26;Axenic_Amastigote=84;
LmxM.06	MF_V1	SLAS	324429	324430	.	+	.	ID=LmxM.06.0820_SLAS_2;Promastigote=13;Intracellular_Amastigote=52;Axenic_Amastigote=49;
LmxM.06	MF_V1	SLAS	324511	324512	.	+	.	ID=LmxM.06.0820_SLAS_3;Promastigote=2;Intracellular_Amastigote=6;Axenic_Amastigote=11;
LmxM.06	MF_V1	SLAS	327594	327595	.	+	.	ID=LmxM.06.0830_SLAS_1;Promastigote=136;Intracellular_Amastigote=109;Axenic_Amastigote=242;
LmxM.06	MF_V1	SLAS	327602	327603	.	+	.	ID=LmxM.06.0830_SLAS_2;Promastigote=2;Intracellular_Amastigote=3;Axenic_Amastigote=5;
LmxM.06	MF_V1	SLAS	333442	333443	.	+	.	ID=LmxM.06.0840_SLAS_1;Promastigote=902;Intracellular_Amastigote=718;Axenic_Amastigote=945;
LmxM.06	MF_V1	SLAS	333450	333451	.	+	.	ID=LmxM.06.0840_SLAS_2;Promastigote=19;Intracellular_Amastigote=8;Axenic_Amastigote=23;
LmxM.06	MF_V1	SLAS	333457	333458	.	+	.	ID=LmxM.06.0840_SLAS_3;Promastigote=52;Intracellular_Amastigote=30;Axenic_Amastigote=86;
LmxM.06	MF_V1	SLAS	333488	333489	.	+	.	ID=LmxM.06.0840_SLAS_4;Promastigote=4;Intracellular_Amastigote=2;Axenic_Amastigote=5;
LmxM.06	MF_V1	SLAS	335264	335265	.	+	.	ID=LmxM.06.0850_SLAS_1;Promastigote=0;Intracellular_Amastigote=3;Axenic_Amastigote=8;
LmxM.06	MF_V1	SLAS	335272	335273	.	+	.	ID=LmxM.06.0850_SLAS_2;Promastigote=53;Intracellular_Amastigote=20;Axenic_Amastigote=52;
LmxM.06	MF_V1	SLAS	335354	335355	.	+	.	ID=LmxM.06.0850_SLAS_3;Promastigote=13;Intracellular_Amastigote=4;Axenic_Amastigote=27;
LmxM.06	MF_V1	SLAS	346902	346903	.	+	.	ID=LmxM.06.0860_SLAS_1;Promastigote=6;Intracellular_Amastigote=3;Axenic_Amastigote=5;
LmxM.06	MF_V1	SLAS	346939	346940	.	+	.	ID=LmxM.06.0860_SLAS_2;Promastigote=149;Intracellular_Amastigote=38;Axenic_Amastigote=209;
LmxM.06	MF_V1	SLAS	346948	346949	.	+	.	ID=LmxM.06.0860_SLAS_3;Promastigote=68;Intracellular_Amastigote=15;Axenic_Amastigote=74;
LmxM.06	MF_V1	SLAS	347058	347059	.	+	.	ID=LmxM.06.0860_SLAS_4;Promastigote=97;Intracellular_Amastigote=16;Axenic_Amastigote=91;
LmxM.06	MF_V1	SLAS	347070	347071	.	+	.	ID=LmxM.06.0860_SLAS_5;Promastigote=324;Intracellular_Amastigote=75;Axenic_Amastigote=302;
LmxM.06	MF_V1	SLAS	347079	347080	.	+	.	ID=LmxM.06.0860_SLAS_6;Promastigote=32;Intracellular_Amastigote=7;Axenic_Amastigote=26;
LmxM.06	MF_V1	SLAS	347125	347126	.	+	.	ID=LmxM.06.0860_SLAS_7;Promastigote=18;Intracellular_Amastigote=0;Axenic_Amastigote=24;
LmxM.06	MF_V1	SLAS	347137	347138	.	+	.	ID=LmxM.06.0860_SLAS_8;Promastigote=4;Intracellular_Amastigote=0;Axenic_Amastigote=7;
LmxM.06	MF_V1	SLAS	349949	349950	.	+	.	ID=LmxM.06.0870_SLAS_1;Promastigote=42;Intracellular_Amastigote=21;Axenic_Amastigote=51;
LmxM.06	MF_V1	SLAS	350041	350042	.	+	.	ID=LmxM.06.0870_SLAS_2;Promastigote=26;Intracellular_Amastigote=2;Axenic_Amastigote=14;
LmxM.06	MF_V1	SLAS	350062	350063	.	+	.	ID=LmxM.06.0870_SLAS_3;Promastigote=17;Intracellular_Amastigote=5;Axenic_Amastigote=7;
LmxM.06	MF_V1	SLAS	352331	352332	.	+	.	ID=LmxM.06.0880_SLAS_1;Promastigote=112;Intracellular_Amastigote=168;Axenic_Amastigote=269;
LmxM.06	MF_V1	SLAS	352978	352979	.	+	.	ID=LmxM.06.0880_SLAS_2;Promastigote=325;Intracellular_Amastigote=272;Axenic_Amastigote=569;
LmxM.06	MF_V1	SLAS	353072	353073	.	+	.	ID=LmxM.06.0880_SLAS_3;Promastigote=46;Intracellular_Amastigote=41;Axenic_Amastigote=79;
LmxM.06	MF_V1	SLAS	355994	355995	.	+	.	ID=LmxM.06.0890_SLAS_1;Promastigote=227;Intracellular_Amastigote=404;Axenic_Amastigote=446;
LmxM.06	MF_V1	SLAS	356002	356003	.	+	.	ID=LmxM.06.0890_SLAS_2;Promastigote=3;Intracellular_Amastigote=4;Axenic_Amastigote=10;
LmxM.06	MF_V1	SLAS	359128	359129	.	+	.	ID=LmxM.06.0900_SLAS_1;Promastigote=177;Intracellular_Amastigote=81;Axenic_Amastigote=207;
LmxM.06	MF_V1	SLAS	359131	359132	.	+	.	ID=LmxM.06.0900_SLAS_2;Promastigote=11;Intracellular_Amastigote=0;Axenic_Amastigote=15;
LmxM.06	MF_V1	SLAS	365844	365845	.	+	.	ID=LmxM.06.0910_SLAS_1;Promastigote=548;Intracellular_Amastigote=419;Axenic_Amastigote=349;
LmxM.06	MF_V1	SLAS	365857	365858	.	+	.	ID=LmxM.06.0910_SLAS_2;Promastigote=24;Intracellular_Amastigote=20;Axenic_Amastigote=32;
LmxM.06	MF_V1	SLAS	367210	367211	.	+	.	ID=LmxM.06.0920_SLAS_1;Promastigote=52;Intracellular_Amastigote=32;Axenic_Amastigote=96;
LmxM.06	MF_V1	SLAS	369330	369331	.	+	.	ID=LmxM.06.0930_SLAS_1;Promastigote=20;Intracellular_Amastigote=23;Axenic_Amastigote=16;
LmxM.06	MF_V1	SLAS	369379	369380	.	+	.	ID=LmxM.06.0930_SLAS_2;Promastigote=167;Intracellular_Amastigote=37;Axenic_Amastigote=228;
LmxM.06	MF_V1	SLAS	372558	372559	.	+	.	ID=LmxM.06.0940_SLAS_1;Promastigote=8;Intracellular_Amastigote=5;Axenic_Amastigote=5;
LmxM.06	MF_V1	SLAS	372636	372637	.	+	.	ID=LmxM.06.0940_SLAS_2;Promastigote=99;Intracellular_Amastigote=14;Axenic_Amastigote=108;
LmxM.06	MF_V1	SLAS	372640	372641	.	+	.	ID=LmxM.06.0940_SLAS_3;Promastigote=4;Intracellular_Amastigote=2;Axenic_Amastigote=3;
LmxM.06	MF_V1	SLAS	372979	372980	.	+	.	ID=LmxM.06.0940_SLAS_4;Promastigote=7;Intracellular_Amastigote=1;Axenic_Amastigote=14;
LmxM.06	MF_V1	SLAS	375750	375751	.	+	.	ID=LmxM.06.0950_SLAS_1;Promastigote=71;Intracellular_Amastigote=22;Axenic_Amastigote=59;
LmxM.06	MF_V1	SLAS	375850	375851	.	+	.	ID=LmxM.06.0950_SLAS_2;Promastigote=19;Intracellular_Amastigote=13;Axenic_Amastigote=17;
LmxM.06	MF_V1	SLAS	379281	379282	.	+	.	ID=LmxM.06.0960_SLAS_1;Promastigote=82;Intracellular_Amastigote=149;Axenic_Amastigote=124;
LmxM.06	MF_V1	SLAS	379292	379293	.	+	.	ID=LmxM.06.0960_SLAS_2;Promastigote=1;Intracellular_Amastigote=4;Axenic_Amastigote=7;
LmxM.06	MF_V1	SLAS	380975	380976	.	+	.	ID=LmxM.06.0970_SLAS_1;Promastigote=7;Intracellular_Amastigote=2;Axenic_Amastigote=6;
LmxM.06	MF_V1	SLAS	386585	386586	.	+	.	ID=LmxM.06.0980_SLAS_1;Promastigote=164;Intracellular_Amastigote=133;Axenic_Amastigote=237;
LmxM.06	MF_V1	SLAS	386622	386623	.	+	.	ID=LmxM.06.0980_SLAS_2;Promastigote=7;Intracellular_Amastigote=5;Axenic_Amastigote=22;
LmxM.06	MF_V1	SLAS	386625	386626	.	+	.	ID=LmxM.06.0980_SLAS_3;Promastigote=3;Intracellular_Amastigote=2;Axenic_Amastigote=8;
LmxM.06	MF_V1	SLAS	386855	386856	.	+	.	ID=LmxM.06.0980_SLAS_4;Promastigote=7;Intracellular_Amastigote=1;Axenic_Amastigote=10;
LmxM.06	MF_V1	SLAS	386859	386860	.	+	.	ID=LmxM.06.0980_SLAS_5;Promastigote=30;Intracellular_Amastigote=7;Axenic_Amastigote=31;
LmxM.06	MF_V1	SLAS	390966	390967	.	+	.	ID=LmxM.06_391458_SLAS_1;Promastigote=5;Intracellular_Amastigote=21;Axenic_Amastigote=28;
LmxM.06	MF_V1	SLAS	392326	392327	.	+	.	ID=LmxM.06.0990_SLAS_1;Promastigote=139;Intracellular_Amastigote=98;Axenic_Amastigote=177;
LmxM.06	MF_V1	SLAS	392423	392424	.	+	.	ID=LmxM.06.0990_SLAS_2;Promastigote=4;Intracellular_Amastigote=2;Axenic_Amastigote=7;
LmxM.06	MF_V1	SLAS	397199	397200	.	+	.	ID=LmxM.06.0995_SLAS_1;Promastigote=6;Intracellular_Amastigote=24;Axenic_Amastigote=5;
LmxM.06	MF_V1	SLAS	397237	397238	.	+	.	ID=LmxM.06.0995_SLAS_2;Promastigote=39;Intracellular_Amastigote=48;Axenic_Amastigote=57;
LmxM.06	MF_V1	SLAS	398116	398117	.	+	.	ID=LmxM.06.1000_SLAS_1;Promastigote=64;Intracellular_Amastigote=42;Axenic_Amastigote=132;
LmxM.06	MF_V1	SLAS	400438	400439	.	+	.	ID=LmxM.06.1010_SLAS_1;Promastigote=109;Intracellular_Amastigote=21;Axenic_Amastigote=192;
LmxM.06	MF_V1	SLAS	400460	400461	.	+	.	ID=LmxM.06.1010_SLAS_2;Promastigote=4;Intracellular_Amastigote=1;Axenic_Amastigote=6;
LmxM.06	MF_V1	SLAS	403484	403485	.	+	.	ID=LmxM.06.1020_SLAS_1;Promastigote=46;Intracellular_Amastigote=28;Axenic_Amastigote=74;
LmxM.06	MF_V1	SLAS	405180	405181	.	+	.	ID=LmxM.06.1030_SLAS_1;Promastigote=7;Intracellular_Amastigote=2;Axenic_Amastigote=10;
LmxM.06	MF_V1	SLAS	405255	405256	.	+	.	ID=LmxM.06.1030_SLAS_2;Promastigote=17;Intracellular_Amastigote=4;Axenic_Amastigote=14;
LmxM.06	MF_V1	SLAS	408629	408630	.	+	.	ID=LmxM.06.1040_SLAS_1;Promastigote=33;Intracellular_Amastigote=16;Axenic_Amastigote=40;
LmxM.06	MF_V1	SLAS	408667	408668	.	+	.	ID=LmxM.06.1040_SLAS_2;Promastigote=29;Intracellular_Amastigote=5;Axenic_Amastigote=26;
LmxM.06	MF_V1	SLAS	411714	411715	.	+	.	ID=LmxM.06.1050_SLAS_1;Promastigote=1010;Intracellular_Amastigote=496;Axenic_Amastigote=1472;
LmxM.06	MF_V1	SLAS	411719	411720	.	+	.	ID=LmxM.06.1050_SLAS_2;Promastigote=12;Intracellular_Amastigote=5;Axenic_Amastigote=38;
LmxM.06	MF_V1	SLAS	411831	411832	.	+	.	ID=LmxM.06.1050_SLAS_3;Promastigote=3;Intracellular_Amastigote=6;Axenic_Amastigote=7;
LmxM.06	MF_V1	SLAS	413192	413193	.	+	.	ID=LmxM.06_413612_SLAS_1;Promastigote=143;Intracellular_Amastigote=247;Axenic_Amastigote=414;
LmxM.06	MF_V1	SLAS	413196	413197	.	+	.	ID=LmxM.06_413612_SLAS_2;Promastigote=12;Intracellular_Amastigote=21;Axenic_Amastigote=31;
LmxM.06	MF_V1	SLAS	413229	413230	.	+	.	ID=LmxM.06_413612_SLAS_3;Promastigote=2;Intracellular_Amastigote=1;Axenic_Amastigote=7;
LmxM.06	MF_V1	SLAS	414209	414210	.	+	.	ID=LmxM.06.1060_SLAS_1;Promastigote=58;Intracellular_Amastigote=32;Axenic_Amastigote=56;
LmxM.06	MF_V1	SLAS	414221	414222	.	+	.	ID=LmxM.06.1060_SLAS_2;Promastigote=6;Intracellular_Amastigote=5;Axenic_Amastigote=3;
LmxM.06	MF_V1	SLAS	416413	416414	.	+	.	ID=LmxM.06.1070_SLAS_1;Promastigote=1353;Intracellular_Amastigote=244;Axenic_Amastigote=556;
LmxM.06	MF_V1	SLAS	416450	416451	.	+	.	ID=LmxM.06.1070_SLAS_2;Promastigote=131;Intracellular_Amastigote=29;Axenic_Amastigote=202;
LmxM.06	MF_V1	SLAS	416488	416489	.	+	.	ID=LmxM.06.1070_SLAS_3;Promastigote=16;Intracellular_Amastigote=9;Axenic_Amastigote=18;
LmxM.06	MF_V1	SLAS	419019	419020	.	+	.	ID=LmxM.06.1080_SLAS_1;Promastigote=20;Intracellular_Amastigote=10;Axenic_Amastigote=29;
LmxM.06	MF_V1	SLAS	419134	419135	.	+	.	ID=LmxM.06.1080_SLAS_2;Promastigote=6;Intracellular_Amastigote=1;Axenic_Amastigote=9;
LmxM.06	MF_V1	SLAS	423361	423362	.	+	.	ID=LmxM.06.1100_SLAS_1;Promastigote=91;Intracellular_Amastigote=13;Axenic_Amastigote=51;
LmxM.06	MF_V1	SLAS	423407	423408	.	+	.	ID=LmxM.06.1100_SLAS_2;Promastigote=178;Intracellular_Amastigote=198;Axenic_Amastigote=233;
LmxM.06	MF_V1	SLAS	423418	423419	.	+	.	ID=LmxM.06.1100_SLAS_3;Promastigote=21;Intracellular_Amastigote=24;Axenic_Amastigote=31;
LmxM.06	MF_V1	SLAS	423447	423448	.	+	.	ID=LmxM.06.1100_SLAS_4;Promastigote=3;Intracellular_Amastigote=0;Axenic_Amastigote=7;
LmxM.06	MF_V1	SLAS	425641	425642	.	+	.	ID=LmxM.06_425823_SLAS_1;Promastigote=70;Intracellular_Amastigote=63;Axenic_Amastigote=166;
LmxM.06	MF_V1	SLAS	425653	425654	.	+	.	ID=LmxM.06_425823_SLAS_2;Promastigote=8;Intracellular_Amastigote=6;Axenic_Amastigote=25;
LmxM.06	MF_V1	SLAS	425662	425663	.	+	.	ID=LmxM.06_425823_SLAS_3;Promastigote=2;Intracellular_Amastigote=2;Axenic_Amastigote=9;
LmxM.06	MF_V1	SLAS	425708	425709	.	+	.	ID=LmxM.06_425823_SLAS_4;Promastigote=26;Intracellular_Amastigote=4;Axenic_Amastigote=27;
LmxM.06	MF_V1	SLAS	426454	426455	.	+	.	ID=LmxM.06.1110_SLAS_1;Promastigote=39;Intracellular_Amastigote=72;Axenic_Amastigote=83;
LmxM.06	MF_V1	SLAS	426608	426609	.	+	.	ID=LmxM.06.1110_SLAS_2;Promastigote=20;Intracellular_Amastigote=10;Axenic_Amastigote=31;
LmxM.06	MF_V1	SLAS	426630	426631	.	+	.	ID=LmxM.06.1110_SLAS_3;Promastigote=12;Intracellular_Amastigote=11;Axenic_Amastigote=15;
LmxM.06	MF_V1	SLAS	432129	432130	.	+	.	ID=LmxM.06.1120_SLAS_1;Promastigote=12;Intracellular_Amastigote=3;Axenic_Amastigote=7;
LmxM.06	MF_V1	SLAS	432194	432195	.	+	.	ID=LmxM.06.1120_SLAS_2;Promastigote=12;Intracellular_Amastigote=5;Axenic_Amastigote=16;
LmxM.06	MF_V1	SLAS	432259	432260	.	+	.	ID=LmxM.06.1120_SLAS_3;Promastigote=68;Intracellular_Amastigote=55;Axenic_Amastigote=91;
LmxM.06	MF_V1	SLAS	432269	432270	.	+	.	ID=LmxM.06.1120_SLAS_4;Promastigote=2;Intracellular_Amastigote=7;Axenic_Amastigote=7;
LmxM.06	MF_V1	SLAS	433811	433812	.	+	.	ID=LmxM.06.1130_SLAS_1;Promastigote=92;Intracellular_Amastigote=50;Axenic_Amastigote=94;
LmxM.06	MF_V1	SLAS	433818	433819	.	+	.	ID=LmxM.06.1130_SLAS_2;Promastigote=9;Intracellular_Amastigote=2;Axenic_Amastigote=5;
LmxM.06	MF_V1	SLAS	433872	433873	.	+	.	ID=LmxM.06.1130_SLAS_3;Promastigote=391;Intracellular_Amastigote=39;Axenic_Amastigote=441;
LmxM.06	MF_V1	SLAS	435357	435358	.	+	.	ID=LmxM.06.1140_SLAS_1;Promastigote=50;Intracellular_Amastigote=81;Axenic_Amastigote=137;
LmxM.06	MF_V1	SLAS	435360	435361	.	+	.	ID=LmxM.06.1140_SLAS_2;Promastigote=13;Intracellular_Amastigote=6;Axenic_Amastigote=31;
LmxM.06	MF_V1	SLAS	438000	438001	.	+	.	ID=LmxM.06.1150_SLAS_1;Promastigote=40;Intracellular_Amastigote=34;Axenic_Amastigote=82;
LmxM.06	MF_V1	SLAS	440096	440097	.	+	.	ID=LmxM.06.1160_SLAS_1;Promastigote=14;Intracellular_Amastigote=14;Axenic_Amastigote=28;
LmxM.06	MF_V1	SLAS	443942	443943	.	+	.	ID=LmxM.06.1170_SLAS_1;Promastigote=41;Intracellular_Amastigote=12;Axenic_Amastigote=30;
LmxM.06	MF_V1	SLAS	444083	444084	.	+	.	ID=LmxM.06.1170_SLAS_2;Promastigote=18;Intracellular_Amastigote=8;Axenic_Amastigote=19;
LmxM.06	MF_V1	SLAS	444142	444143	.	+	.	ID=LmxM.06.1170_SLAS_3;Promastigote=150;Intracellular_Amastigote=44;Axenic_Amastigote=202;
LmxM.06	MF_V1	SLAS	444156	444157	.	+	.	ID=LmxM.06.1170_SLAS_4;Promastigote=1;Intracellular_Amastigote=0;Axenic_Amastigote=10;
LmxM.06	MF_V1	SLAS	445449	445450	.	+	.	ID=LmxM.06.1180_SLAS_1;Promastigote=19;Intracellular_Amastigote=31;Axenic_Amastigote=43;
LmxM.06	MF_V1	SLAS	445565	445566	.	+	.	ID=LmxM.06.1180_SLAS_2;Promastigote=18;Intracellular_Amastigote=22;Axenic_Amastigote=39;
LmxM.06	MF_V1	SLAS	445578	445579	.	+	.	ID=LmxM.06.1180_SLAS_3;Promastigote=65;Intracellular_Amastigote=118;Axenic_Amastigote=162;
LmxM.06	MF_V1	SLAS	445612	445613	.	+	.	ID=LmxM.06.1180_SLAS_4;Promastigote=90;Intracellular_Amastigote=128;Axenic_Amastigote=211;
LmxM.06	MF_V1	SLAS	447947	447948	.	+	.	ID=LmxM.06.1190_SLAS_1;Promastigote=4;Intracellular_Amastigote=1;Axenic_Amastigote=4;
LmxM.06	MF_V1	SLAS	447949	447950	.	+	.	ID=LmxM.06.1190_SLAS_2;Promastigote=51;Intracellular_Amastigote=15;Axenic_Amastigote=98;
LmxM.06	MF_V1	SLAS	448036	448037	.	+	.	ID=LmxM.06.1190_SLAS_3;Promastigote=100;Intracellular_Amastigote=25;Axenic_Amastigote=108;
LmxM.06	MF_V1	SLAS	449056	449057	.	+	.	ID=LmxM.06_449544_SLAS_1;Promastigote=260;Intracellular_Amastigote=91;Axenic_Amastigote=535;
LmxM.06	MF_V1	SLAS	451293	451294	.	+	.	ID=LmxM.06.1200_SLAS_1;Promastigote=557;Intracellular_Amastigote=51;Axenic_Amastigote=343;
LmxM.06	MF_V1	SLAS	453330	453331	.	+	.	ID=LmxM.06.1210_SLAS_1;Promastigote=124;Intracellular_Amastigote=18;Axenic_Amastigote=121;
LmxM.06	MF_V1	SLAS	456074	456075	.	+	.	ID=LmxM.06.1220_SLAS_1;Promastigote=4;Intracellular_Amastigote=6;Axenic_Amastigote=2;
LmxM.06	MF_V1	SLAS	456508	456509	.	+	.	ID=LmxM.06.1220_SLAS_2;Promastigote=6;Intracellular_Amastigote=3;Axenic_Amastigote=3;
LmxM.06	MF_V1	SLAS	460231	460232	.	+	.	ID=LmxM.06.1230_SLAS_1;Promastigote=36;Intracellular_Amastigote=64;Axenic_Amastigote=81;
LmxM.06	MF_V1	SLAS	460239	460240	.	+	.	ID=LmxM.06.1230_SLAS_2;Promastigote=6;Intracellular_Amastigote=13;Axenic_Amastigote=21;
LmxM.06	MF_V1	SLAS	461543	461544	.	+	.	ID=LmxM.06.1240_SLAS_1;Promastigote=133;Intracellular_Amastigote=69;Axenic_Amastigote=225;
LmxM.06	MF_V1	SLAS	464239	464240	.	+	.	ID=LmxM.06.1245_SLAS_1;Promastigote=47;Intracellular_Amastigote=69;Axenic_Amastigote=89;
LmxM.06	MF_V1	SLAS	464269	464270	.	+	.	ID=LmxM.06.1245_SLAS_2;Promastigote=5;Intracellular_Amastigote=4;Axenic_Amastigote=16;
LmxM.06	MF_V1	SLAS	464995	464996	.	+	.	ID=LmxM.06.1250_SLAS_1;Promastigote=4;Intracellular_Amastigote=4;Axenic_Amastigote=10;
LmxM.06	MF_V1	SLAS	465021	465022	.	+	.	ID=LmxM.06.1250_SLAS_2;Promastigote=91;Intracellular_Amastigote=290;Axenic_Amastigote=149;
LmxM.06	MF_V1	SLAS	465033	465034	.	+	.	ID=LmxM.06.1250_SLAS_3;Promastigote=3;Intracellular_Amastigote=8;Axenic_Amastigote=4;
LmxM.06	MF_V1	SLAS	465036	465037	.	+	.	ID=LmxM.06.1250_SLAS_4;Promastigote=11;Intracellular_Amastigote=21;Axenic_Amastigote=24;
LmxM.06	MF_V1	SLAS	465096	465097	.	+	.	ID=LmxM.06.1250_SLAS_5;Promastigote=0;Intracellular_Amastigote=3;Axenic_Amastigote=6;
LmxM.06	MF_V1	SLAS	470588	470589	.	-	.	ID=LmxM.06.1260_SLAS_6;Promastigote=5;Intracellular_Amastigote=0;Axenic_Amastigote=4;
LmxM.06	MF_V1	SLAS	470591	470592	.	-	.	ID=LmxM.06.1260_SLAS_5;Promastigote=22;Intracellular_Amastigote=5;Axenic_Amastigote=11;
LmxM.06	MF_V1	SLAS	470596	470597	.	-	.	ID=LmxM.06.1260_SLAS_4;Promastigote=33;Intracellular_Amastigote=3;Axenic_Amastigote=11;
LmxM.06	MF_V1	SLAS	470628	470629	.	-	.	ID=LmxM.06.1260_SLAS_3;Promastigote=20;Intracellular_Amastigote=21;Axenic_Amastigote=12;
LmxM.06	MF_V1	SLAS	470636	470637	.	-	.	ID=LmxM.06.1260_SLAS_2;Promastigote=554;Intracellular_Amastigote=179;Axenic_Amastigote=233;
LmxM.06	MF_V1	SLAS	470646	470647	.	-	.	ID=LmxM.06.1260_SLAS_1;Promastigote=844;Intracellular_Amastigote=206;Axenic_Amastigote=228;
LmxM.06	MF_V1	SLAS	473265	473266	.	-	.	ID=LmxM.06.1270_SLAS_1;Promastigote=15;Intracellular_Amastigote=3;Axenic_Amastigote=29;
LmxM.06	MF_V1	SLAS	474880	474881	.	-	.	ID=LmxM.06.1280_SLAS_4;Promastigote=12;Intracellular_Amastigote=3;Axenic_Amastigote=3;
LmxM.06	MF_V1	SLAS	474927	474928	.	-	.	ID=LmxM.06.1280_SLAS_3;Promastigote=203;Intracellular_Amastigote=40;Axenic_Amastigote=238;
LmxM.06	MF_V1	SLAS	474964	474965	.	-	.	ID=LmxM.06.1280_SLAS_2;Promastigote=7;Intracellular_Amastigote=4;Axenic_Amastigote=8;
LmxM.06	MF_V1	SLAS	475876	475877	.	-	.	ID=LmxM.06.1280_SLAS_1;Promastigote=153;Intracellular_Amastigote=30;Axenic_Amastigote=109;
LmxM.06	MF_V1	SLAS	476393	476394	.	-	.	ID=LmxM.06.1290_SLAS_3;Promastigote=62;Intracellular_Amastigote=29;Axenic_Amastigote=74;
LmxM.06	MF_V1	SLAS	476396	476397	.	-	.	ID=LmxM.06.1290_SLAS_2;Promastigote=3;Intracellular_Amastigote=4;Axenic_Amastigote=16;
LmxM.06	MF_V1	SLAS	476409	476410	.	-	.	ID=LmxM.06.1290_SLAS_1;Promastigote=694;Intracellular_Amastigote=168;Axenic_Amastigote=353;
LmxM.07	MF_V1	SLAS	5614	5615	.	-	.	ID=LmxM.07.0010_SLAS_3;Promastigote=2;Intracellular_Amastigote=0;Axenic_Amastigote=8;
LmxM.07	MF_V1	SLAS	5651	5652	.	-	.	ID=LmxM.07.0010_SLAS_2;Promastigote=7;Intracellular_Amastigote=16;Axenic_Amastigote=15;
LmxM.07	MF_V1	SLAS	9340	9341	.	-	.	ID=LmxM.07.0010_SLAS_1;Promastigote=7;Intracellular_Amastigote=7;Axenic_Amastigote=4;
LmxM.07	MF_V1	SLAS	10745	10746	.	+	.	ID=LmxM.07.0020_SLAS_1;Promastigote=33;Intracellular_Amastigote=42;Axenic_Amastigote=72;
LmxM.07	MF_V1	SLAS	11973	11974	.	+	.	ID=LmxM.07.0025_SLAS_1;Promastigote=45;Intracellular_Amastigote=18;Axenic_Amastigote=76;
LmxM.07	MF_V1	SLAS	13494	13495	.	+	.	ID=LmxM.07.0030_SLAS_1;Promastigote=45;Intracellular_Amastigote=9;Axenic_Amastigote=54;
LmxM.07	MF_V1	SLAS	15757	15758	.	+	.	ID=LmxM.07.0040_SLAS_1;Promastigote=135;Intracellular_Amastigote=25;Axenic_Amastigote=131;
LmxM.07	MF_V1	SLAS	15764	15765	.	+	.	ID=LmxM.07.0040_SLAS_2;Promastigote=7;Intracellular_Amastigote=4;Axenic_Amastigote=13;
LmxM.07	MF_V1	SLAS	17296	17297	.	+	.	ID=LmxM.07.0050_SLAS_1;Promastigote=42;Intracellular_Amastigote=22;Axenic_Amastigote=27;
LmxM.07	MF_V1	SLAS	20329	20330	.	+	.	ID=LmxM.07.0060_SLAS_1;Promastigote=3;Intracellular_Amastigote=1;Axenic_Amastigote=9;
LmxM.07	MF_V1	SLAS	21801	21802	.	+	.	ID=LmxM.07.0060_SLAS_2;Promastigote=4063;Intracellular_Amastigote=1496;Axenic_Amastigote=2615;
LmxM.07	MF_V1	SLAS	21815	21816	.	+	.	ID=LmxM.07.0060_SLAS_3;Promastigote=113;Intracellular_Amastigote=28;Axenic_Amastigote=121;
LmxM.07	MF_V1	SLAS	21818	21819	.	+	.	ID=LmxM.07.0060_SLAS_4;Promastigote=90;Intracellular_Amastigote=14;Axenic_Amastigote=91;
LmxM.07	MF_V1	SLAS	23613	23614	.	+	.	ID=LmxM.07.0070_SLAS_1;Promastigote=12;Intracellular_Amastigote=2;Axenic_Amastigote=5;
LmxM.07	MF_V1	SLAS	23767	23768	.	+	.	ID=LmxM.07.0070_SLAS_2;Promastigote=46;Intracellular_Amastigote=22;Axenic_Amastigote=56;
LmxM.07	MF_V1	SLAS	23800	23801	.	+	.	ID=LmxM.07.0070_SLAS_3;Promastigote=1;Intracellular_Amastigote=1;Axenic_Amastigote=8;
LmxM.07	MF_V1	SLAS	23806	23807	.	+	.	ID=LmxM.07.0070_SLAS_4;Promastigote=68;Intracellular_Amastigote=28;Axenic_Amastigote=106;
LmxM.07	MF_V1	SLAS	23809	23810	.	+	.	ID=LmxM.07.0070_SLAS_5;Promastigote=4;Intracellular_Amastigote=2;Axenic_Amastigote=6;
LmxM.07	MF_V1	SLAS	24850	24851	.	+	.	ID=LmxM.07.0080_SLAS_1;Promastigote=17;Intracellular_Amastigote=11;Axenic_Amastigote=25;
LmxM.07	MF_V1	SLAS	24915	24916	.	+	.	ID=LmxM.07.0080_SLAS_2;Promastigote=33;Intracellular_Amastigote=6;Axenic_Amastigote=53;
LmxM.07	MF_V1	SLAS	24924	24925	.	+	.	ID=LmxM.07.0080_SLAS_3;Promastigote=43;Intracellular_Amastigote=2;Axenic_Amastigote=60;
LmxM.07	MF_V1	SLAS	24934	24935	.	+	.	ID=LmxM.07.0080_SLAS_4;Promastigote=2;Intracellular_Amastigote=0;Axenic_Amastigote=14;
LmxM.07	MF_V1	SLAS	25011	25012	.	+	.	ID=LmxM.07.0080_SLAS_5;Promastigote=3;Intracellular_Amastigote=3;Axenic_Amastigote=3;
LmxM.07	MF_V1	SLAS	28731	28732	.	+	.	ID=LmxM.07.0090_SLAS_1;Promastigote=74;Intracellular_Amastigote=57;Axenic_Amastigote=150;
LmxM.07	MF_V1	SLAS	34154	34155	.	+	.	ID=LmxM.07.0100_SLAS_1;Promastigote=311;Intracellular_Amastigote=218;Axenic_Amastigote=262;
LmxM.07	MF_V1	SLAS	34160	34161	.	+	.	ID=LmxM.07.0100_SLAS_2;Promastigote=34;Intracellular_Amastigote=21;Axenic_Amastigote=29;
LmxM.07	MF_V1	SLAS	34183	34184	.	+	.	ID=LmxM.07.0100_SLAS_3;Promastigote=4;Intracellular_Amastigote=1;Axenic_Amastigote=4;
LmxM.07	MF_V1	SLAS	34771	34772	.	+	.	ID=LmxM.07.0100_SLAS_4;Promastigote=277;Intracellular_Amastigote=23;Axenic_Amastigote=59;
LmxM.07	MF_V1	SLAS	34787	34788	.	+	.	ID=LmxM.07.0100_SLAS_5;Promastigote=46;Intracellular_Amastigote=8;Axenic_Amastigote=8;
LmxM.07	MF_V1	SLAS	34789	34790	.	+	.	ID=LmxM.07.0100_SLAS_6;Promastigote=9;Intracellular_Amastigote=0;Axenic_Amastigote=1;
LmxM.07	MF_V1	SLAS	38832	38833	.	+	.	ID=LmxM.07_39505_SLAS_1;Promastigote=21;Intracellular_Amastigote=3;Axenic_Amastigote=2;
LmxM.07	MF_V1	SLAS	38982	38983	.	+	.	ID=LmxM.07_39505_SLAS_2;Promastigote=26;Intracellular_Amastigote=36;Axenic_Amastigote=59;
[truncated: 19,249 more rows]
