# Supplementary material for: Comparative Life Cycle Transcriptomics Revises Leishmania mexicana Genome Annotation and Links a Chromosome Duplication with Parasitism of Vertebrates
Source: PLoS Pathog. 2015 Oct 9;11(10):e1005186. doi: 10.1371/journal.ppat.1005186 (PMC4599935; doi:10.1371/journal.ppat.1005186)
Supplement: S4 Table — GFF feature recordColumns are , , , , , (“.” denotes no score), (“.” denotes not relevant), , [attribute] (XLS) [file ppat.1005186.s008.xls]

## Sheet: final_truncated_entries
Chromosome	Source	Type	GFF_start	GFF_end	Dot1	Strand	Dot2	ID
LmxM.01	RNA_seq_based_annotation	Truncated_CDS	47634	48434	.	-	.	LmxM.01.0200
LmxM.02	RNA_seq_based_annotation	Truncated_CDS	4	315	.	-	.	LmxM.02.0030
LmxM.02	RNA_seq_based_annotation	Truncated_CDS	17683	18564	.	-	.	LmxM.02.0085
LmxM.04	RNA_seq_based_annotation	Truncated_CDS	59678	60568	.	+	.	LmxM.04.0210
LmxM.04	RNA_seq_based_annotation	Truncated_CDS	79408	85296	.	+	.	LmxM.04.0280
LmxM.04	RNA_seq_based_annotation	Truncated_CDS	198803	199873	.	-	.	LmxM.04.0530
LmxM.04	RNA_seq_based_annotation	Truncated_CDS	284694	285212	.	-	.	LmxM.04.0760
LmxM.04	RNA_seq_based_annotation	Truncated_CDS	313854	314549	.	-	.	LmxM.04.0860
LmxM.04	RNA_seq_based_annotation	Truncated_CDS	366347	366979	.	-	.	LmxM.04.1050
LmxM.05	RNA_seq_based_annotation	Truncated_CDS	100675	102636	.	+	.	LmxM.05.0300
LmxM.05	RNA_seq_based_annotation	Truncated_CDS	172453	174177	.	+	.	LmxM.05.0510
LmxM.05	RNA_seq_based_annotation	Truncated_CDS	419461	420972	.	-	.	LmxM.05.1130
LmxM.06	RNA_seq_based_annotation	Truncated_CDS	74708	75349	.	-	.	LmxM.06.0230
LmxM.06	RNA_seq_based_annotation	Truncated_CDS	278369	281092	.	+	.	LmxM.06.0740
LmxM.06	RNA_seq_based_annotation	Truncated_CDS	435398	437653	.	+	.	LmxM.06.1140
LmxM.07	RNA_seq_based_annotation	Truncated_CDS	10780	11589	.	+	.	LmxM.07.0020
LmxM.07	RNA_seq_based_annotation	Truncated_CDS	207353	221905	.	+	.	LmxM.07.0480
LmxM.07	RNA_seq_based_annotation	Truncated_CDS	228868	229662	.	+	.	LmxM.07.0510
LmxM.07	RNA_seq_based_annotation	Truncated_CDS	522135	523472	.	+	.	LmxM.07.1070
LmxM.08	RNA_seq_based_annotation	Truncated_CDS	95568	96593	.	-	.	LmxM.08_29.2560
LmxM.08	RNA_seq_based_annotation	Truncated_CDS	341380	343674	.	+	.	LmxM.08_29.1950
LmxM.08	RNA_seq_based_annotation	Truncated_CDS	347230	347850	.	+	.	LmxM.08_29.1940
LmxM.08	RNA_seq_based_annotation	Truncated_CDS	630309	632111	.	-	.	LmxM.08_29.1310
LmxM.08	RNA_seq_based_annotation	Truncated_CDS	735025	736146	.	-	.	LmxM.08_29.1090
LmxM.08	RNA_seq_based_annotation	Truncated_CDS	1062677	1064434	.	+	.	LmxM.08_29.0260
LmxM.08	RNA_seq_based_annotation	Truncated_CDS	1155355	1156110	.	+	.	LmxM.08_29.0010
LmxM.08	RNA_seq_based_annotation	Truncated_CDS	1289248	1290972	.	+	.	LmxM.08.0360
LmxM.08	RNA_seq_based_annotation	Truncated_CDS	1480497	1481084	.	+	.	LmxM.08.0760
LmxM.08	RNA_seq_based_annotation	Truncated_CDS	1654455	1655759	.	+	.	LmxM.08.1223
LmxM.09	RNA_seq_based_annotation	Truncated_CDS	65489	65863	.	+	.	LmxM.09.0180
LmxM.09	RNA_seq_based_annotation	Truncated_CDS	427506	429677	.	-	.	LmxM.09.1160
LmxM.10	RNA_seq_based_annotation	Truncated_CDS	254851	257151	.	-	.	LmxM.10.0580
LmxM.10	RNA_seq_based_annotation	Truncated_CDS	476391	476792	.	-	.	LmxM.10.1225
LmxM.10	RNA_seq_based_annotation	Truncated_CDS	481706	481903	.	+	.	LmxM.10.1228
LmxM.11	RNA_seq_based_annotation	Truncated_CDS	358023	359804	.	+	.	LmxM.11.0920
LmxM.12	RNA_seq_based_annotation	Truncated_CDS	13269	14999	.	+	.	LmxM.12.0070
LmxM.12	RNA_seq_based_annotation	Truncated_CDS	17679	19124	.	+	.	LmxM.12.0090
LmxM.12	RNA_seq_based_annotation	Truncated_CDS	120568	122373	.	+	.	LmxM.12.0310
LmxM.12	RNA_seq_based_annotation	Truncated_CDS	391997	397087	.	+	.	LmxM.12.1100
LmxM.13	RNA_seq_based_annotation	Truncated_CDS	29246	30487	.	-	.	LmxM.13.0100
LmxM.13	RNA_seq_based_annotation	Truncated_CDS	51726	53048	.	-	.	LmxM.13.0180
LmxM.13	RNA_seq_based_annotation	Truncated_CDS	90325	91680	.	-	.	LmxM.13.0280
LmxM.13	RNA_seq_based_annotation	Truncated_CDS	93414	94769	.	-	.	LmxM.13.0390
LmxM.13	RNA_seq_based_annotation	Truncated_CDS	212850	213878	.	-	.	LmxM.13.0720
LmxM.13	RNA_seq_based_annotation	Truncated_CDS	394765	395586	.	-	.	LmxM.13.1220
LmxM.13	RNA_seq_based_annotation	Truncated_CDS	402428	402880	.	-	.	LmxM.13.1250
LmxM.14	RNA_seq_based_annotation	Truncated_CDS	215197	216546	.	-	.	LmxM.14.0610
LmxM.14	RNA_seq_based_annotation	Truncated_CDS	226681	227523	.	-	.	LmxM.14.0640
LmxM.14	RNA_seq_based_annotation	Truncated_CDS	249152	249499	.	-	.	LmxM.14.0690
LmxM.15	RNA_seq_based_annotation	Truncated_CDS	78590	79474	.	-	.	LmxM.15.0195
LmxM.15	RNA_seq_based_annotation	Truncated_CDS	136901	139927	.	+	.	LmxM.15.0360
LmxM.15	RNA_seq_based_annotation	Truncated_CDS	284902	286035	.	+	.	LmxM.15.0730
LmxM.15	RNA_seq_based_annotation	Truncated_CDS	349361	351166	.	-	.	LmxM.15.0870
LmxM.15	RNA_seq_based_annotation	Truncated_CDS	410520	410870	.	-	.	LmxM.15.1150
LmxM.15	RNA_seq_based_annotation	Truncated_CDS	555195	555356	.	-	.	LmxM.15.1520
LmxM.16	RNA_seq_based_annotation	Truncated_CDS	241948	244806	.	-	.	LmxM.16.0710
LmxM.16	RNA_seq_based_annotation	Truncated_CDS	298968	300869	.	-	.	LmxM.16.0820
LmxM.16	RNA_seq_based_annotation	Truncated_CDS	310451	311128	.	-	.	LmxM.16.0860
LmxM.16	RNA_seq_based_annotation	Truncated_CDS	436970	437434	.	+	.	LmxM.16.1120
LmxM.16	RNA_seq_based_annotation	Truncated_CDS	573963	575762	.	-	.	LmxM.16.1430
LmxM.16	RNA_seq_based_annotation	Truncated_CDS	626191	627090	.	+	.	LmxM.16.1530
LmxM.17	RNA_seq_based_annotation	Truncated_CDS	157814	159559	.	-	.	LmxM.17.0350
LmxM.17	RNA_seq_based_annotation	Truncated_CDS	628070	630187	.	+	.	LmxM.17.1380
LmxM.19	RNA_seq_based_annotation	Truncated_CDS	7652	8449	.	-	.	LmxM.19.0060
LmxM.19	RNA_seq_based_annotation	Truncated_CDS	355712	358384	.	+	.	LmxM.19.0930
LmxM.19	RNA_seq_based_annotation	Truncated_CDS	394887	397460	.	+	.	LmxM.19.1010
LmxM.19	RNA_seq_based_annotation	Truncated_CDS	437328	437624	.	+	.	LmxM.19.1090
LmxM.20	RNA_seq_based_annotation	Truncated_CDS	36313	38862	.	-	.	LmxM.36.0110
LmxM.20	RNA_seq_based_annotation	Truncated_CDS	316674	317456	.	+	.	LmxM.36.0880
LmxM.20	RNA_seq_based_annotation	Truncated_CDS	470784	472418	.	+	.	LmxM.36.1300
LmxM.20	RNA_seq_based_annotation	Truncated_CDS	477447	478541	.	+	.	LmxM.36.1330
LmxM.20	RNA_seq_based_annotation	Truncated_CDS	496035	497687	.	-	.	LmxM.36.1380
LmxM.20	RNA_seq_based_annotation	Truncated_CDS	617615	617962	.	-	.	LmxM.36.1620
LmxM.20	RNA_seq_based_annotation	Truncated_CDS	751730	751987	.	-	.	LmxM.36.1925
LmxM.20	RNA_seq_based_annotation	Truncated_CDS	766597	767559	.	-	.	LmxM.36.1955
LmxM.20	RNA_seq_based_annotation	Truncated_CDS	1081162	1082016	.	-	.	LmxM.36.2685
LmxM.20	RNA_seq_based_annotation	Truncated_CDS	1234921	1235523	.	-	.	LmxM.36.3130
LmxM.20	RNA_seq_based_annotation	Truncated_CDS	1320546	1321466	.	-	.	LmxM.36.3410
LmxM.20	RNA_seq_based_annotation	Truncated_CDS	1390704	1391372	.	-	.	LmxM.36.3660
LmxM.20	RNA_seq_based_annotation	Truncated_CDS	1392277	1393218	.	+	.	LmxM.36.3670
LmxM.20	RNA_seq_based_annotation	Truncated_CDS	1393589	1394056	.	+	.	LmxM.36.3675
LmxM.20	RNA_seq_based_annotation	Truncated_CDS	1985497	1986879	.	-	.	LmxM.36.5230
LmxM.20	RNA_seq_based_annotation	Truncated_CDS	2130610	2131929	.	-	.	LmxM.36.5610
LmxM.20	RNA_seq_based_annotation	Truncated_CDS	2181005	2181775	.	-	.	LmxM.36.5790
LmxM.20	RNA_seq_based_annotation	Truncated_CDS	2737348	2738409	.	+	.	LmxM.20.0270
LmxM.20	RNA_seq_based_annotation	Truncated_CDS	3286026	3288464	.	-	.	LmxM.20.1530
LmxM.20	RNA_seq_based_annotation	Truncated_CDS	3333911	3334405	.	-	.	LmxM.20.1610
LmxM.21	RNA_seq_based_annotation	Truncated_CDS	73901	75316	.	+	.	LmxM.21.0240
LmxM.21	RNA_seq_based_annotation	Truncated_CDS	109267	111147	.	+	.	LmxM.21.0370
LmxM.21	RNA_seq_based_annotation	Truncated_CDS	556302	557312	.	-	.	LmxM.21.1410
LmxM.21	RNA_seq_based_annotation	Truncated_CDS	701488	702564	.	+	.	LmxM.21.1740
LmxM.22	RNA_seq_based_annotation	Truncated_CDS	274915	275823	.	-	.	LmxM.22.0710
LmxM.22	RNA_seq_based_annotation	Truncated_CDS	460432	461766	.	+	.	LmxM.22.1120
LmxM.22	RNA_seq_based_annotation	Truncated_CDS	477770	479113	.	+	.	LmxM.22.1180
LmxM.22	RNA_seq_based_annotation	Truncated_CDS	507376	508617	.	-	.	LmxM.22.1270
LmxM.23	RNA_seq_based_annotation	Truncated_CDS	392391	393755	.	-	.	LmxM.23.0820
LmxM.23	RNA_seq_based_annotation	Truncated_CDS	496506	497873	.	-	.	LmxM.23.1065
LmxM.23	RNA_seq_based_annotation	Truncated_CDS	528270	530120	.	-	.	LmxM.23.1150
LmxM.24	RNA_seq_based_annotation	Truncated_CDS	15142	16578	.	+	.	LmxM.24.0080
LmxM.24	RNA_seq_based_annotation	Truncated_CDS	17161	17829	.	+	.	LmxM.24.0090
LmxM.24	RNA_seq_based_annotation	Truncated_CDS	128938	130809	.	+	.	LmxM.24.0390
LmxM.24	RNA_seq_based_annotation	Truncated_CDS	140748	144596	.	+	.	LmxM.24.0430
LmxM.24	RNA_seq_based_annotation	Truncated_CDS	307292	307804	.	+	.	LmxM.24.0870
LmxM.24	RNA_seq_based_annotation	Truncated_CDS	315315	318785	.	+	.	LmxM.24.0900
LmxM.24	RNA_seq_based_annotation	Truncated_CDS	357527	360283	.	+	.	LmxM.24.1040
LmxM.24	RNA_seq_based_annotation	Truncated_CDS	383116	386382	.	+	.	LmxM.24.1100
LmxM.24	RNA_seq_based_annotation	Truncated_CDS	407666	408700	.	+	.	LmxM.24.1140
LmxM.24	RNA_seq_based_annotation	Truncated_CDS	472136	472729	.	+	.	LmxM.24.1315
LmxM.24	RNA_seq_based_annotation	Truncated_CDS	566512	567024	.	+	.	LmxM.24.1500
LmxM.25	RNA_seq_based_annotation	Truncated_CDS	11531	12091	.	-	.	LmxM.25.0020
LmxM.25	RNA_seq_based_annotation	Truncated_CDS	136451	137596	.	-	.	LmxM.25.0450
LmxM.25	RNA_seq_based_annotation	Truncated_CDS	317512	320817	.	+	.	LmxM.25.0860
LmxM.25	RNA_seq_based_annotation	Truncated_CDS	504485	505768	.	-	.	LmxM.25.1290
LmxM.25	RNA_seq_based_annotation	Truncated_CDS	641700	643022	.	-	.	LmxM.25.1640
LmxM.25	RNA_seq_based_annotation	Truncated_CDS	723694	724278	.	-	.	LmxM.25.1890
LmxM.25	RNA_seq_based_annotation	Truncated_CDS	725020	726033	.	-	.	LmxM.25.1900
LmxM.25	RNA_seq_based_annotation	Truncated_CDS	739097	739435	.	-	.	LmxM.25.1960
LmxM.25	RNA_seq_based_annotation	Truncated_CDS	820224	820736	.	+	.	LmxM.25.2235
LmxM.25	RNA_seq_based_annotation	Truncated_CDS	823940	824341	.	+	.	LmxM.25.2250
LmxM.26	RNA_seq_based_annotation	Truncated_CDS	41830	42552	.	-	.	LmxM.26.0180
LmxM.26	RNA_seq_based_annotation	Truncated_CDS	736191	738458	.	+	.	LmxM.26.2030
LmxM.27	RNA_seq_based_annotation	Truncated_CDS	1011489	1012214	.	+	.	LmxM.27.2440
LmxM.27	RNA_seq_based_annotation	Truncated_CDS	1021862	1023229	.	+	.	LmxM.27.2490
LmxM.28	RNA_seq_based_annotation	Truncated_CDS	828717	829415	.	+	.	LmxM.28.2160
LmxM.28	RNA_seq_based_annotation	Truncated_CDS	1117333	1117698	.	-	.	LmxM.28.2970
LmxM.29	RNA_seq_based_annotation	Truncated_CDS	220612	221244	.	-	.	LmxM.29.0705
LmxM.29	RNA_seq_based_annotation	Truncated_CDS	230929	231546	.	+	.	LmxM.29.0735
LmxM.29	RNA_seq_based_annotation	Truncated_CDS	414066	415307	.	+	.	LmxM.29.1240
LmxM.29	RNA_seq_based_annotation	Truncated_CDS	707184	708344	.	+	.	LmxM.29.2030
LmxM.29	RNA_seq_based_annotation	Truncated_CDS	743237	744337	.	-	.	LmxM.29.2120
LmxM.29	RNA_seq_based_annotation	Truncated_CDS	975067	976332	.	-	.	LmxM.29.2660
LmxM.29	RNA_seq_based_annotation	Truncated_CDS	1317283	1317441	.	+	.	LmxM.29.3720
LmxM.30	RNA_seq_based_annotation	Truncated_CDS	49820	51166	.	-	.	LmxM.30.0200
LmxM.30	RNA_seq_based_annotation	Truncated_CDS	59642	60265	.	-	.	LmxM.30.0221
LmxM.30	RNA_seq_based_annotation	Truncated_CDS	64287	65813	.	-	.	LmxM.30.0240
LmxM.30	RNA_seq_based_annotation	Truncated_CDS	86414	89827	.	-	.	LmxM.30.0310
LmxM.30	RNA_seq_based_annotation	Truncated_CDS	238350	241136	.	-	.	LmxM.30.0630
LmxM.30	RNA_seq_based_annotation	Truncated_CDS	692496	696869	.	-	.	LmxM.30.1490
LmxM.30	RNA_seq_based_annotation	Truncated_CDS	829941	831683	.	-	.	LmxM.30.1800
LmxM.30	RNA_seq_based_annotation	Truncated_CDS	1109709	1112435	.	-	.	LmxM.30.2320
LmxM.30	RNA_seq_based_annotation	Truncated_CDS	1128383	1132876	.	-	.	LmxM.30.2350
LmxM.30	RNA_seq_based_annotation	Truncated_CDS	1136752	1138134	.	-	.	LmxM.30.2370
LmxM.30	RNA_seq_based_annotation	Truncated_CDS	1211542	1214193	.	-	.	LmxM.30.2560
LmxM.30	RNA_seq_based_annotation	Truncated_CDS	1221486	1221698	.	-	.	LmxM.30.2580
LmxM.30	RNA_seq_based_annotation	Truncated_CDS	1240624	1242180	.	-	.	LmxM.30.2640
LmxM.30	RNA_seq_based_annotation	Truncated_CDS	1300918	1301631	.	-	.	LmxM.30.2780
LmxM.30	RNA_seq_based_annotation	Truncated_CDS	1374851	1376218	.	-	.	LmxM.30.3010
LmxM.31	RNA_seq_based_annotation	Truncated_CDS	247421	247771	.	+	.	LmxM.31.0715
LmxM.31	RNA_seq_based_annotation	Truncated_CDS	406340	408082	.	+	.	LmxM.31.1040
LmxM.31	RNA_seq_based_annotation	Truncated_CDS	453708	454787	.	+	.	LmxM.31.1170
LmxM.31	RNA_seq_based_annotation	Truncated_CDS	933112	935349	.	-	.	LmxM.31.2501
LmxM.31	RNA_seq_based_annotation	Truncated_CDS	1373883	1376210	.	+	.	LmxM.31.3440
LmxM.32	RNA_seq_based_annotation	Truncated_CDS	225115	227457	.	+	.	LmxM.32.0670
LmxM.32	RNA_seq_based_annotation	Truncated_CDS	284548	285879	.	+	.	LmxM.32.0794
LmxM.32	RNA_seq_based_annotation	Truncated_CDS	644228	644818	.	+	.	LmxM.32.1630
LmxM.33	RNA_seq_based_annotation	Truncated_CDS	89171	89443	.	+	.	LmxM.33.0260
LmxM.33	RNA_seq_based_annotation	Truncated_CDS	355929	356663	.	+	.	LmxM.33.0840
LmxM.33	RNA_seq_based_annotation	Truncated_CDS	363882	365534	.	+	.	LmxM.33.0870
LmxM.33	RNA_seq_based_annotation	Truncated_CDS	375636	376001	.	+	.	LmxM.33.0910
LmxM.33	RNA_seq_based_annotation	Truncated_CDS	826923	829238	.	-	.	LmxM.33.2260
LmxM.33	RNA_seq_based_annotation	Truncated_CDS	876462	877529	.	-	.	LmxM.33.2410
LmxM.33	RNA_seq_based_annotation	Truncated_CDS	1074808	1075290	.	+	.	LmxM.33.2780
LmxM.33	RNA_seq_based_annotation	Truncated_CDS	1281330	1282916	.	+	.	LmxM.33.3350
LmxM.33	RNA_seq_based_annotation	Truncated_CDS	1283606	1284166	.	+	.	LmxM.33.3360
LmxM.33	RNA_seq_based_annotation	Truncated_CDS	1450463	1452541	.	+	.	LmxM.33.3870
LmxM.33	RNA_seq_based_annotation	Truncated_CDS	1581790	1582236	.	+	.	LmxM.33.4170
LmxM.33	RNA_seq_based_annotation	Truncated_CDS	1592889	1593185	.	+	.	LmxM.33.4230
LmxM.34	RNA_seq_based_annotation	Truncated_CDS	55295	55552	.	+	.	LmxM.34.0240
LmxM.34	RNA_seq_based_annotation	Truncated_CDS	112094	113797	.	+	.	LmxM.34.0430
LmxM.34	RNA_seq_based_annotation	Truncated_CDS	130431	130547	.	+	.	LmxM.34.0480
LmxM.34	RNA_seq_based_annotation	Truncated_CDS	491946	492143	.	+	.	LmxM.34.1310
LmxM.34	RNA_seq_based_annotation	Truncated_CDS	648805	649098	.	-	.	LmxM.34.1750
LmxM.34	RNA_seq_based_annotation	Truncated_CDS	1106751	1110176	.	-	.	LmxM.34.2920
LmxM.34	RNA_seq_based_annotation	Truncated_CDS	1769494	1769898	.	+	.	LmxM.34.4840
LmxM.34	RNA_seq_based_annotation	Truncated_CDS	632759	634003	.	-	.	LmxM.34.1690
LmxM.33	RNA_seq_based_annotation	Truncated_CDS	559528	562354	.	-	.	LmxM.33.1310
LmxM.32	RNA_seq_based_annotation	Truncated_CDS	155771	158947	.	-	.	LmxM.32.0490
LmxM.25	RNA_seq_based_annotation	Truncated_CDS	344203	344443	.	+	.	LmxM.25.0940
LmxM.25	RNA_seq_based_annotation	Truncated_CDS	387468	387588	.	+	.	LmxM.25.1030
LmxM.14	RNA_seq_based_annotation	Truncated_CDS	145621	146823	.	+	.	LmxM.14.0430
LmxM.09	RNA_seq_based_annotation	Truncated_CDS	424547	425023	.	-	.	LmxM.09.1140
LmxM.09	RNA_seq_based_annotation	Truncated_CDS	297536	298234	.	-	.	LmxM.09.0780
LmxM.08	RNA_seq_based_annotation	Truncated_CDS	1591009	1592616	.	-	.	LmxM.08.1090
LmxM.31	RNA_seq_based_annotation	Truncated_CDS	1170838	1171287	.	+	.	LmxM.31.2998
