# Supplementary material for: Comparative Life Cycle Transcriptomics Revises Leishmania mexicana Genome Annotation and Links a Chromosome Duplication with Parasitism of Vertebrates
Source: PLoS Pathog. 2015 Oct 9;11(10):e1005186. doi: 10.1371/journal.ppat.1005186 (PMC4599935; doi:10.1371/journal.ppat.1005186)
Supplement: S6 Table — (XLSX) [file ppat.1005186.s010.xlsx]

## Sheet: RBBx
Table S6. Reciprocal best tblastx analysis of conserved and novel genes. The 936 novel transcripts, control CDS of 7 genes with known conservation patterns and the intergenic sequences downstream of the control CDS (control 3 'IG) were used as query sequences in tblastx analyses of 13 kinetoplastid genomes (including L. mexicana). Numbers represent the –log10 E-value of the returned reciprocal be…
Sequence ID	sequence type	L. mexicana	L. major	L. donovani	L. infantum	L. tarentolae	L. braziliensis	L. panamensis	C. fasciculata	E. montegeii	T. brucei	T. congolense	T. cruzi B.E-L	Phytomonas EM1
LmxM.34.4280	control CDS	Inf	Inf	Inf	Inf	Inf	Inf	Inf	159.398	Inf	91.2218	34.5229	105.699	82.5229
LmxM.20.0490	control CDS	161.523	66.2218	73.2218	73.699	64	55.301	51.3979	31.5229	39.5229	15	14.5229	15	17.0969
LmxM.32.3190	control CDS	Inf	84.5229	94.699	94	74.699	62.3979	62.3979	59.0969	58	14.699	14.0458	14.3979	27.5229
LmxM.29.2980	control CDS	Inf	Inf	Inf	Inf	Inf	Inf	Inf	Inf	Inf	Inf	Inf	Inf	167
LmxM.25.0960	control CDS	Inf	Inf	Inf	Inf	Inf	Inf	Inf	Inf	Inf	Inf	Inf	Inf	Inf
LmxM.20.1300	control CDS	Inf	84.301	85.5229	86.699	70.0458	66	19.5229	NA	NA	NA	NA	NA	NA
LmxM.16.1430	control CDS	Inf	Inf	Inf	Inf	Inf	Inf	Inf	Inf	Inf	Inf	Inf	Inf	Inf
LmxM.10.0970	control CDS	87.699	76	73.3979	73.3979	58.3979	65.0969	64.301	NA	70.3979	46.2218	NA	46.3979	53.0458
LmxM.33.0070	control CDS	Inf	Inf	Inf	Inf	Inf	171.699	171.222	160.699	160.046	NA	NA	131.398	3
LmxM.08.0760	control CDS	Inf	71.1549	NA	NA	NA	NA	NA	NA	NA	4.69897	4.52288	NA	NA
LmxM.16.1425partial_LmxM.16.1430_IGS	control 3' IG	Inf	40.0969	36.699	36	NA	14.2218	2	NA	2.69897	NA	2.69897	2.39794	NA
LmxM.29.2960_LmxM.29.2980_IGS	control 3' IG	Inf	26.2218	32.5229	31	11.699	3.52288	3.22185	4.22185	NA	NA	NA	NA	NA
LmxM.25.0960_LmxM.25.0970_IGS	control 3' IG	Inf	30.699	33.5229	34.301	9.09691	NA	NA	NA	NA	2.69897	2.69897	NA	NA
LmxM.34.4280_LmxM.34.4290_IGS	control 3' IG	Inf	27.699	36.0969	37.1549	15.699	12.301	9.1549	NA	NA	4.69897	NA	NA	1.67778
LmxM.20.0490_LmxM.20_2819583_IGS	control 3' IG	154.097	17.699	7.69897	8.39794	5.30103	NA	NA	NA	3.69897	2.30103	3	NA	NA
LmxM.32.3190_LmxM.32.3200_IGS	control 3' IG	180	26.5229	33.699	29.3979	8.52288	16.2218	18	NA	NA	NA	2.22185	NA	NA
LmxM.33.0070_LmxM.33.0080_IGS	control 3' IG	Inf	118.097	121.097	121.222	14.0458	14	9	NA	1.82391	NA	3	4	NA
LmxM.10.0960_LmxM.10.0970_IGS	control 3' IG	142.155	19	28.699	31.699	NA	NA	6	NA	NA	NA	NA	NA	NA
LmxM.20.1300_LmxM.20.1310_IGS	control 3' IG	144.699	25.699	47.0458	28.699	4.52288	5.04576	5.39794	NA	NA	NA	NA	NA	NA
LmxM.08.0760_LmxM.08_1484979_IGS	control 3' IG	168	NA	NA	NA	NA	NA	NA	NA	NA	5	5	3.52288	3.22185
LmxM.01_53687	novel transcript	141	21.0458	26.3979	26.3979	6.30103	NA	NA	NA	NA	NA	4.39794	NA	2.52288
LmxM.01_57483	novel transcript	158.046	NA	NA	NA	10.699	NA	NA	NA	NA	NA	NA	NA	NA
LmxM.01_107651	novel transcript	Inf	NA	NA	13.2218	NA	NA	NA	NA	3	NA	3	NA	NA
LmxM.01_123594	novel transcript	120.046	NA	NA	NA	2.52288	3.69897	2.69897	NA	NA	NA	NA	NA	NA
LmxM.01_195286	novel transcript	65.301	10	11.0458	14	NA	NA	1.65758	4	NA	1.92082	NA	2.22185	2.30103
LmxM.01_232406	novel transcript	51.0969	NA	NA	NA	NA	NA	NA	NA	NA	12	11	11.5229	NA
LmxM.01_240110	novel transcript	65.2218	27.5229	36	36	21.3979	12.699	11.1549	NA	9	2.30103	1.79588	NA	NA
LmxM.02_11936	novel transcript	161	61.699	75.2218	98.1549	9.04576	NA	NA	NA	NA	3	NA	NA	-0.146128
LmxM.02_84177	novel transcript	176.523	26.1549	27	27	NA	NA	NA	NA	14.301	NA	NA	NA	NA
LmxM.02_159692	novel transcript	162	11.1549	13.3979	13.3979	4.1549	9	9	NA	3.39794	NA	NA	NA	NA
LmxM.03_78395	novel transcript	89.0458	28	29	29	6.22185	2.52288	NA	NA	NA	2.39794	NA	NA	NA
LmxM.03_101644	novel transcript	86.1549	18	11.2218	11.5229	2.69897	NA	1.09151	NA	NA	NA	NA	NA	NA
LmxM.03_153620	novel transcript	125.398	13	17.699	15.301	1.18709	NA	2.69897	8.1549	3.69897	NA	NA	3.30103	NA
LmxM.03_204918	novel transcript	Inf	32	30.5229	30.5229	NA	13.2218	11.0969	NA	NA	NA	NA	NA	NA
LmxM.04_50854	novel transcript	167.398	16	14	15.0458	NA	NA	NA	NA	NA	NA	NA	NA	NA
LmxM.04_123059	novel transcript	Inf	25.1549	28	28	22.699	NA	NA	7.39794	15.699	1.92082	NA	NA	3
LmxM.04_201044	novel transcript	121.523	41.699	34.1549	36.0969	3.39794	NA	3.52288	NA	NA	NA	NA	2.52288	NA
LmxM.04_212255	novel transcript	144.699	22.5229	17.2218	17.2218	8.30103	9.52288	7.1549	0.677781	7.1549	NA	3	1.92082	NA
LmxM.04_243246	novel transcript	Inf	29.0969	50	51.0969	13	7.69897	11	24.3979	NA	3.04576	NA	NA	NA
LmxM.04_246981	novel transcript	93.699	32	34.3979	30	12.0458	5.22185	5.22185	NA	NA	1.63827	NA	NA	NA
LmxM.04_422972	novel transcript	Inf	76.699	102.155	101	53.5229	59	58.2218	45.5229	48.699	24.699	23.699	22	28.5229
LmxM.05_111769	novel transcript	Inf	NA	21.301	21.301	NA	13.5229	12.699	NA	NA	NA	NA	NA	NA
LmxM.05_145594	novel transcript	Inf	NA	NA	NA	11.5229	NA	8	13	NA	NA	3.52288	NA	NA
LmxM.05_253920	novel transcript	165.699	7.39794	NA	NA	12.1549	5.39794	5.39794	NA	NA	NA	1.65758	3	1.79588
LmxM.05_296301	novel transcript	Inf	120.699	104.523	105.155	91.301	91	89.699	79.699	80.699	55.1549	56	53.2218	NA
LmxM.05_361535	novel transcript	Inf	79	50	50	38.1549	39	19.3979	22.5229	20.3979	NA	12.699	NA	13.3979
LmxM.05_399275	novel transcript	Inf	17.699	21.699	21.699	9	4.1549	3.39794	-0.0791812	NA	NA	2.52288	NA	NA
LmxM.05_414407	novel transcript	Inf	37	37.301	38	17.5229	9	10.3979	NA	NA	2.04576	2.30103	3.30103	NA
LmxM.05_426918	novel transcript	76.3979	34.5229	36.5229	36.5229	34.0969	26.699	27.0969	16.0458	11.3979	1.38722	NA	NA	NA
LmxM.06_1380	novel transcript	Inf	25	40.2218	33.699	18.699	NA	4.1549	3.69897	NA	NA	NA	NA	NA
LmxM.06_9341	novel transcript	Inf	48.5229	69.3979	68.3979	14.0969	NA	NA	NA	NA	NA	2.30103	NA	NA
LmxM.06_18579	novel transcript	Inf	89.0458	80.1549	80.699	26.699	28.699	27.5229	3	10.2218	NA	NA	3.39794	4
LmxM.06_27195	novel transcript	154.699	26.0458	33.3979	33.3979	9.09691	11.301	3.52288	NA	NA	NA	NA	NA	NA
LmxM.06_29862	novel transcript	65.3979	13.0969	13	13	NA	4	4.52288	NA	NA	NA	NA	3	2.04576
LmxM.06_68747	novel transcript	Inf	59.301	84.5229	84.699	44.3979	35.0458	35.0458	24	25	9.39794	11.5229	2.52288	16
LmxM.06_69456	novel transcript	57.699	21	23	23	18.5229	17.3979	17.3979	15	16.3979	13	13.3979	13	NA
LmxM.06_94775	novel transcript	Inf	98.0969	145.699	146.523	55.699	27.3979	28	38.0969	37.301	4.22185	5	8.1549	NA
LmxM.06_101525	novel transcript	Inf	32.699	26.5229	26.5229	15.699	6.69897	NA	NA	-0.556303	5.69897	NA	NA	NA
LmxM.06_109552	novel transcript	91	17	14.0969	14.0969	2.69897	NA	NA	NA	NA	2.22185	2.52288	2.04576	1.65758
LmxM.06_129660	novel transcript	98.2218	36.301	39	39	16.3979	6.09691	7	NA	NA	1.37675	2.69897	2.69897	NA
LmxM.06_152779	novel transcript	66.5229	21.3979	14	14	6	NA	NA	NA	NA	NA	NA	1.50864	2.52288
LmxM.06_265056	novel transcript	100.398	5	9	NA	4.69897	NA	NA	NA	NA	NA	1.50864	1.79588	NA
LmxM.06_277328	novel transcript	165	19.5229	21.699	21.699	11.301	NA	NA	NA	NA	NA	NA	NA	NA
LmxM.06_299794	novel transcript	Inf	64.1549	52.5229	52	16.5229	27.2218	33.5229	NA	8	NA	5.52288	NA	NA
LmxM.06_391458	novel transcript	68.3979	24	27.699	27.699	4.30103	NA	NA	2.39794	NA	NA	NA	NA	3.30103
LmxM.06_413612	novel transcript	116.699	23	25.1549	26.5229	12.3979	NA	NA	NA	NA	NA	NA	3.39794	2.04576
LmxM.06_425823	novel transcript	71	23.5229	14.699	14.2218	5.22185	NA	NA	NA	NA	NA	2.30103	NA	NA
LmxM.06_449544	novel transcript	Inf	55	82.0969	81.2218	33.2218	24.699	24.699	13.5229	13.699	NA	NA	3.1549	NA
LmxM.07_39505	novel transcript	Inf	45.3979	98.699	97.301	16.699	NA	NA	27.0969	NA	3	3	NA	NA
LmxM.07_189754	novel transcript	121.699	21.0458	35.0458	35.0458	3.1549	5.69897	5.69897	NA	NA	2.39794	1.79588	NA	NA
LmxM.07_339360	novel transcript	87.5229	11.5229	13.699	13.699	NA	NA	1.50864	NA	NA	1.37675	NA	NA	2.69897
LmxM.07_431674	novel transcript	159.301	NA	27.699	27.699	14.0969	NA	3.69897	NA	NA	NA	NA	NA	NA
LmxM.07_440071	novel transcript	163.398	23.699	29	29	10.5229	4.69897	4.69897	2.69897	NA	4.52288	NA	3.1549	NA
LmxM.07_452850	novel transcript	146.301	92.2218	73	71.2218	31.1549	45	38.0969	7.39794	10.0969	NA	NA	NA	NA
LmxM.07_533696	novel transcript	88	70.1549	54.699	55	59.5229	33.0969	42.2218	30.5229	31.5229	22	24.301	22	23.301
LmxM.07_534553	novel transcript	Inf	96.301	118.699	105.222	50.1549	55.2218	54.699	NA	47.0458	NA	24.2218	NA	34
LmxM.07_561159	novel transcript	Inf	64.1549	41.5229	41.699	8.69897	NA	1.85387	NA	NA	NA	NA	NA	NA
LmxM.08_24839	novel transcript	Inf	42.2218	NA	39.699	16.699	NA	NA	NA	NA	NA	NA	NA	NA
LmxM.08_37973	novel transcript	Inf	42	38.699	NA	16.699	NA	NA	NA	NA	NA	NA	NA	NA
LmxM.08_52740	novel transcript	Inf	NA	NA	NA	5.39794	8.30103	9.69897	11.699	NA	2.69897	2.39794	NA	NA
LmxM.08_73062	novel transcript	Inf	29.0969	30	34.0458	6	NA	NA	NA	NA	NA	1.82391	NA	NA
LmxM.08_158460	novel transcript	Inf	29.3979	13.699	28	10.3979	NA	8.1549	NA	NA	NA	NA	NA	NA
LmxM.08_185075	novel transcript	Inf	40.301	36.2218	36.2218	13.3979	NA	8	NA	NA	NA	2.69897	2.39794	NA
LmxM.08_208836	novel transcript	Inf	66	48	41.5229	27.5229	NA	16.3979	NA	4	NA	3.30103	NA	NA
LmxM.08_237531	novel transcript	164	26	27.3979	15.301	15.1549	NA	11	NA	NA	NA	2.69897	4	NA
LmxM.08_344258	novel transcript	Inf	39	41.699	41.699	5.1549	NA	NA	NA	NA	NA	NA	NA	NA
LmxM.08_345792	novel transcript	Inf	32.301	46.3979	46.3979	20	7	7.39794	4	5.69897	-0.973128	0.823909	NA	NA
LmxM.08_379547	novel transcript	Inf	68.301	33	33	32.1549	12.5229	8.39794	2.30103	3.52288	2.52288	2.69897	3.52288	NA
LmxM.08_413798	novel transcript	Inf	45.2218	62.5229	62.3979	7.69897	5.09691	NA	NA	2.22185	NA	NA	NA	NA
LmxM.08_422207	novel transcript	Inf	NA	52	73.2218	10.0458	NA	NA	NA	1.92082	NA	NA	NA	NA
LmxM.08_474959	novel transcript	Inf	18.0458	NA	25.699	8.69897	NA	NA	NA	5.52288	1.92082	NA	3	NA
LmxM.08_486417	novel transcript	Inf	30	30.301	30.301	13.301	8	3.39794	2.69897	7.39794	2.69897	2.52288	NA	NA
LmxM.08_498113	novel transcript	Inf	58	104.699	108.398	34	39.699	62.301	26.3979	34.5229	8	5.04576	7.39794	8.69897
LmxM.08_560271	novel transcript	Inf	23	21.3979	21	2.22185	NA	NA	NA	NA	NA	2.22185	NA	NA
LmxM.08_590248	novel transcript	Inf	11.301	32.2218	40.699	NA	NA	NA	NA	NA	NA	NA	NA	NA
LmxM.08_627089	novel transcript	55.3979	20	20	19.5229	2.69897	NA	NA	NA	NA	NA	NA	2.69897	NA
LmxM.08_632833	novel transcript	155.398	16.3979	14.0969	16.1549	3	4.39794	3	1.79588	NA	NA	3	NA	NA
LmxM.08_645231	novel transcript	Inf	32.3979	38.5229	35.699	12	12	11.699	NA	NA	1.26761	1.79588	1.52288	NA
LmxM.08_708030	novel transcript	Inf	28	29.699	33	17	8.04576	7.30103	NA	NA	4.1549	3.39794	NA	NA
LmxM.08_766410	novel transcript	Inf	NA	NA	22.5229	NA	7.04576	7.04576	NA	NA	NA	NA	NA	NA
LmxM.08_767558	novel transcript	Inf	78.5229	88	87.0458	15.5229	25.3979	25	23.1549	37.0969	NA	NA	2.22185	2.69897
LmxM.08_801135	novel transcript	122.699	54.1549	41	41	12.0458	5.69897	6.69897	NA	1.50864	3.30103	NA	0.677781	NA
LmxM.08_822992	novel transcript	Inf	33.301	30.0969	30.0969	10.5229	11.3979	NA	NA	NA	NA	NA	NA	NA
LmxM.08_825120	novel transcript	Inf	131.155	160	159.699	95	90.5229	94.2218	34.1549	55.5229	NA	NA	NA	27
LmxM.08_850472	novel transcript	106.097	10.2218	18.1549	18.1549	7.69897	NA	NA	NA	NA	NA	2.69897	NA	NA
LmxM.08_851909	novel transcript	Inf	8.69897	13.699	13.699	8.69897	NA	NA	NA	NA	2.30103	3	NA	1.23657
LmxM.08_884211	novel transcript	Inf	70.301	78.3979	79.5229	49.2218	19.3979	26	14.1549	16.0458	NA	3.69897	NA	NA
LmxM.08_889917	novel transcript	179.699	38.301	32.5229	32.5229	20	9	8.39794	3	NA	2.69897	NA	NA	NA
LmxM.08_1000447	novel transcript	Inf	NA	26	38.699	NA	NA	NA	NA	NA	4	NA	NA	NA
LmxM.08_1008719	novel transcript	Inf	45.1549	41	41	15.699	NA	NA	NA	3	NA	2.39794	NA	NA
LmxM.08_1040671	novel transcript	120.222	21.2218	18.5229	14	6.22185	NA	NA	NA	NA	3.22185	NA	NA	3
LmxM.08_1048727	novel transcript	Inf	63	55.3979	54.3979	49.2218	34	42.1549	7.1549	27.301	NA	NA	3.22185	NA
LmxM.08_1059897	novel transcript	Inf	NA	23.1549	19.699	NA	NA	15.5229	NA	NA	NA	NA	3.39794	NA
LmxM.08_1074274	novel transcript	Inf	59.699	58.699	58.699	17	13	NA	NA	NA	NA	NA	NA	NA
LmxM.08_1101248	novel transcript	43	16.1549	15.699	15.699	NA	8.22185	NA	1.92082	NA	1.65758	3	NA	NA
LmxM.08_1102071	novel transcript	Inf	22	29.301	29	12.699	8	8.30103	NA	NA	NA	NA	NA	NA
LmxM.08_1121173	novel transcript	140.097	35.3979	40	39.301	7.30103	NA	3.39794	NA	NA	NA	2.69897	NA	2.69897
LmxM.08_1139529	novel transcript	162.097	NA	20.301	20.301	7.1549	NA	NA	NA	NA	NA	NA	3	1.61979
LmxM.08_1144994	novel transcript	110.046	23	20.301	20.301	6.69897	NA	NA	NA	NA	NA	NA	3	NA
LmxM.08_1153879	novel transcript	Inf	21.3979	35.3979	35.3979	6.30103	6.69897	6	9.69897	NA	2.04576	NA	2.69897	NA
LmxM.08_1157406	novel transcript	Inf	27	52.1549	49.699	7.1549	4	NA	NA	NA	NA	2.69897	1.52288	NA
LmxM.08_1172187	novel transcript	64.3979	23.3979	37.699	37.699	14.3979	16	15.5229	NA	3.1549	1.21467	1.37675	NA	NA
LmxM.08_1424150	novel transcript	111	69.699	73.5229	73.3979	16	NA	1.37675	NA	NA	NA	4	3.52288	NA
LmxM.08_1437036	novel transcript	Inf	NA	41	41	13.3979	NA	NA	NA	4.30103	3	1.37675	NA	NA
LmxM.08_1446422	novel transcript	77.699	27.301	19.301	29.1549	NA	NA	NA	NA	NA	NA	NA	NA	NA
LmxM.08_1449783	novel transcript	144.301	NA	10.3979	17.2218	NA	NA	NA	NA	NA	NA	3	NA	NA
LmxM.08_1455604	novel transcript	Inf	NA	NA	NA	NA	NA	NA	NA	NA	2.52288	NA	2.69897	NA
LmxM.08_1463383	novel transcript	Inf	NA	NA	NA	7	NA	NA	NA	NA	NA	NA	NA	4
LmxM.08_1469531	novel transcript	Inf	34.699	NA	NA	NA	NA	NA	NA	NA	NA	4.39794	NA	NA
LmxM.08_1476073	novel transcript	NA	NA	69.0458	73	NA	NA	NA	NA	3.30103	NA	NA	NA	NA
LmxM.08_1479331	novel transcript	171.523	NA	NA	NA	NA	NA	NA	NA	NA	3.52288	NA	2.69897	NA
LmxM.08_1484979	novel transcript	Inf	NA	NA	NA	NA	NA	NA	NA	NA	NA	2.69897	NA	4.39794
LmxM.08_1491863	novel transcript	Inf	49.1549	41.699	42	10.0969	1.38722	4.52288	NA	NA	NA	NA	3	NA
LmxM.08_1505806	novel transcript	Inf	NA	28	28	NA	NA	NA	NA	NA	NA	2.69897	NA	NA
LmxM.08_1509453	novel transcript	150.523	29.0458	36.2218	36.699	NA	NA	NA	NA	NA	NA	2.69897	NA	NA
LmxM.08_1514466	novel transcript	117.699	28	36.2218	30.301	NA	NA	NA	NA	NA	1.65758	NA	NA	NA
LmxM.08_1545655	novel transcript	Inf	54.699	59.0458	58.699	11.301	15	16.5229	24	NA	2	NA	1.20761	NA
LmxM.08_1603858	novel transcript	135.155	88.3979	90.699	89	81.0969	39.3979	39	14.3979	15.2218	1.50864	NA	2.30103	2.04576
LmxM.08_1616063	novel transcript	124.699	30.5229	28.301	29	11	9.1549	9.1549	1.65758	NA	NA	2.69897	NA	NA
LmxM.08_1640715	novel transcript	Inf	24.699	NA	NA	25.3979	10	14.2218	40	NA	20.301	19	23.301	NA
LmxM.09_6143	novel transcript	100	46.3979	51.5229	50.0969	25.0458	30.3979	31.2218	12.699	12.5229	1.50864	1.92082	1.50864	NA
LmxM.09_73559	novel transcript	150	10.2218	NA	NA	NA	NA	NA	NA	NA	NA	NA	NA	NA
LmxM.09_94875	novel transcript	Inf	14.699	12.0969	NA	10.301	NA	NA	NA	NA	NA	NA	4.22185	NA
LmxM.09_138074	novel transcript	98.2218	23.301	18.301	15.2218	NA	NA	NA	NA	1.65758	3.52288	NA	NA	NA
LmxM.09_206921	novel transcript	60.0458	7.04576	3.30103	3.30103	NA	NA	4.30103	NA	NA	NA	NA	1.65758	NA
LmxM.09_382995	novel transcript	Inf	123.523	176.398	166.699	142.398	137.699	150	84.301	121.699	17.5229	18.0458	17.5229	NA
LmxM.09_413310	novel transcript	101.301	NA	NA	NA	NA	NA	NA	NA	NA	NA	NA	NA	NA
LmxM.09_417796	novel transcript	133.222	22.699	23.1549	21.699	NA	7	6	NA	NA	NA	NA	NA	NA
LmxM.09_507449	novel transcript	Inf	44.699	96.0969	97.699	18.699	56.3979	58	16.3979	NA	NA	2.30103	NA	NA
LmxM.09_515422	novel transcript	Inf	53.2218	63.5229	63.5229	14.301	7.30103	9	38.3979	NA	NA	NA	NA	NA
LmxM.10_2591	novel transcript	Inf	40	35.699	35.699	27.1549	NA	NA	NA	NA	NA	NA	NA	NA
LmxM.10_62641	novel transcript	66.699	5.52288	5.39794	5.39794	2.04576	NA	NA	NA	NA	NA	NA	NA	NA
LmxM.10_74864	novel transcript	Inf	27.301	37.5229	36.3979	20.5229	NA	NA	1.85387	NA	NA	0.958607	NA	NA
LmxM.10_90343	novel transcript	107	29.3979	14.3979	10.699	5.39794	NA	NA	NA	NA	NA	NA	NA	NA
LmxM.10_140396	novel transcript	Inf	31.2218	33.3979	39	7.39794	12.301	8.39794	NA	NA	NA	NA	NA	NA
LmxM.10_142346	novel transcript	Inf	30.699	33.301	40.5229	NA	11.699	NA	NA	NA	NA	1.65758	NA	NA
LmxM.10_Inf718	novel transcript	Inf	29.2218	55.699	56.301	NA	6	1.50864	3.30103	4.30103	NA	NA	NA	NA
LmxM.10_173304	novel transcript	Inf	NA	38.3979	34.3979	23.3979	NA	NA	NA	NA	NA	NA	NA	NA
LmxM.10_199248	novel transcript	168.301	30.0969	30.5229	NA	NA	5.69897	NA	NA	1.92082	2.69897	2.69897	2.39794	4.30103
LmxM.10_201839	novel transcript	113	12.5229	NA	11	NA	NA	NA	NA	3	NA	NA	NA	NA
LmxM.10_305390	novel transcript	Inf	135.523	138.699	138.523	77.5229	124	117.301	121.398	122.699	61.1549	53.699	32.301	76
LmxM.10_310478	novel transcript	60	18.3979	19.3979	19.3979	13.699	25.3979	25.3979	21.3979	18.2218	4.69897	NA	1.20761	3.39794
LmxM.10_313308	novel transcript	149.097	19	10.2218	11.699	NA	NA	NA	NA	1.50864	1.65758	NA	1.79588	NA
LmxM.10_437565	novel transcript	128	30.2218	40.301	40.301	28.3979	34.5229	34.5229	4.52288	14.301	3.39794	2.69897	NA	5
LmxM.10_477682	novel transcript	132.398	50.3979	41	41	38.699	26.2218	NA	22	21.5229	2.52288	1.92082	6.39794	12.1549
LmxM.10_478397	novel transcript	135.699	85.301	70.699	70.699	68	65	NA	35.699	51.3979	1.58503	1.52288	NA	4.52288
LmxM.11_29705	novel transcript	151.222	28.3979	27.0458	28.5229	12	3	5.39794	1.09691	NA	2.22185	1.82391	NA	NA
LmxM.11_59226	novel transcript	Inf	57.5229	57.699	73.699	18.0969	NA	NA	6.39794	NA	NA	3	NA	NA
LmxM.11_60253	novel transcript	136.523	50.5229	51.301	53	33.1549	23.699	25	NA	18.1549	2.69897	3	NA	NA
LmxM.11_76418	novel transcript	Inf	42.0458	23.3979	46.0969	NA	NA	NA	NA	NA	1.79588	1.92082	NA	NA
LmxM.11_173321	novel transcript	Inf	26.2218	59.2218	49.5229	15.699	4	4.69897	5	NA	NA	NA	NA	NA
LmxM.11_193234	novel transcript	Inf	15.1549	17.699	17.699	3	NA	NA	NA	4	NA	3	NA	2.69897
LmxM.11_194280	novel transcript	Inf	51.699	36.3979	55.3979	16.3979	NA	5.52288	NA	NA	2.04576	NA	NA	NA
LmxM.11_244822	novel transcript	96.301	12.3979	31.3979	10.699	9	4	4	NA	NA	NA	NA	NA	2.04576
LmxM.11_305205	novel transcript	Inf	24.3979	27.3979	27.699	4.30103	6.52288	6	NA	NA	3.39794	3.30103	NA	1.10791
LmxM.11_307776	novel transcript	98.699	4.1549	7.30103	9.69897	5.69897	4.69897	NA	NA	NA	3.30103	3.52288	NA	NA
LmxM.11_343183	novel transcript	Inf	120.523	152.046	143.699	61.0969	61.2218	60.699	17.699	30.301	NA	NA	NA	6.22185
LmxM.11_387060	novel transcript	58.5229	9.69897	6.39794	6.39794	NA	3.52288	NA	NA	NA	NA	2.39794	NA	NA
LmxM.11_426903	novel transcript	149.301	42.3979	87.699	87.699	NA	NA	NA	21.699	25.0969	NA	NA	NA	NA
LmxM.11_461343	novel transcript	Inf	29.3979	16	16	5	NA	NA	NA	2.69897	2.04576	NA	NA	NA
LmxM.11_518063	novel transcript	Inf	100.222	96.699	101	13	9.22185	NA	2.69897	NA	4.30103	2.52288	NA	2.69897
LmxM.12_20327	novel transcript	Inf	78.3979	38.1549	38.1549	21.0969	25.1549	23.5229	25.301	NA	5	NA	NA	2.22185
LmxM.12_65775	novel transcript	Inf	51.699	53.5229	53.5229	13.301	NA	NA	NA	NA	NA	3	NA	2.69897
LmxM.12_84344	novel transcript	Inf	58.5229	NA	NA	NA	NA	NA	26.5229	8.1549	NA	NA	NA	NA
LmxM.12_105940	novel transcript	Inf	51.3979	53.5229	50.0458	13.301	NA	NA	NA	NA	NA	NA	NA	NA
LmxM.12_255117	novel transcript	Inf	34.5229	38.699	37.301	11.301	NA	NA	NA	4.69897	NA	NA	NA	3
LmxM.12_260513	novel transcript	Inf	110.523	80.2218	86.5229	32.5229	21.699	19.5229	4.30103	17.5229	3.52288	NA	NA	3.30103
LmxM.12_273981	novel transcript	61.3979	39.2218	33.699	33.699	24.699	30	28.699	5	15.2218	0	NA	NA	NA
LmxM.12_279523	novel transcript	174.523	117.097	85.3979	84.5229	33.1549	32.3979	35	NA	NA	3	2.52288	29.5229	NA
LmxM.12_285464	novel transcript	Inf	66	67.1549	66.3979	33.0969	27.699	30.3979	20.3979	26.699	7	NA	12.301	12.3979
LmxM.12_340742	novel transcript	Inf	42.5229	27.3979	28	NA	NA	NA	NA	NA	NA	2.30103	NA	NA
LmxM.12_389271	novel transcript	147.523	19	21	20.301	NA	6.69897	6.52288	NA	NA	3.39794	NA	NA	NA
LmxM.12_390601	novel transcript	Inf	11.3979	22.699	20.1549	NA	NA	NA	NA	4.30103	6.04576	3.69897	NA	NA
LmxM.12_407974	novel transcript	127.222	5.69897	7.39794	7.39794	NA	NA	NA	3.1549	NA	NA	2.69897	NA	NA
LmxM.12_477510	novel transcript	Inf	13.0969	21.301	18.699	5.09691	10.5229	11.699	4.39794	NA	2.1549	NA	2.04576	2.22185
LmxM.12_502033	novel transcript	Inf	52.699	37.5229	37.3979	5	4.1549	3.39794	NA	3.1549	NA	1.65758	NA	NA
LmxM.13_5093	novel transcript	128	47.2218	47	44	14.699	21	22	NA	NA	3.1549	2.04576	3.1549	NA
LmxM.13_22199	novel transcript	Inf	23	25.699	25.699	22	7.1549	4.04576	NA	NA	NA	NA	NA	NA
LmxM.13_27011	novel transcript	Inf	NA	26.5229	26.5229	14	NA	7.39794	NA	NA	2.39794	NA	NA	NA
LmxM.13_35696	novel transcript	Inf	42.301	55.5229	55.0969	16.0969	10.0969	10.0969	NA	NA	3.1549	NA	NA	NA
LmxM.13_117731	novel transcript	Inf	46.699	44.5229	42.699	22.2218	16	3.39794	35	7.22185	NA	NA	NA	NA
LmxM.13_158814	novel transcript	57	14.301	NA	NA	2.69897	NA	2.69897	NA	NA	NA	NA	NA	1.65758
LmxM.13_172912	novel transcript	163.699	18.3979	19.2218	20.1549	11	3	2.69897	NA	NA	NA	NA	NA	NA
LmxM.13_191476	novel transcript	142.155	33	26.699	27.1549	NA	NA	8.52288	NA	NA	NA	NA	NA	NA
LmxM.13_214298	novel transcript	31.699	7.22185	8	8	2.69897	NA	NA	2.22185	NA	NA	1.37675	NA	NA
LmxM.13_332574	novel transcript	41.699	22.699	27.5229	27.5229	3.69897	NA	0.79588	NA	NA	NA	NA	NA	2.69897
LmxM.13_384638	novel transcript	Inf	21.0969	17.699	20	NA	13	NA	2.39794	NA	1.79588	NA	NA	NA
LmxM.13_411910	novel transcript	Inf	20.5229	24.699	24.3979	7	11.0458	9	2.22185	NA	NA	NA	3	NA
LmxM.13_421550	novel transcript	Inf	11.699	11.0969	11.0969	4.30103	NA	NA	NA	NA	NA	3	3.1549	NA
LmxM.13_473248	novel transcript	Inf	40	41	39.0969	4.69897	1.65758	NA	NA	4.22185	1.92082	2.30103	2.52288	NA
LmxM.13_503797	novel transcript	132.398	38	41.5229	40.5229	NA	NA	NA	NA	NA	NA	1.92082	NA	NA
LmxM.13_516338	novel transcript	Inf	NA	NA	NA	26.5229	NA	NA	NA	NA	NA	NA	NA	NA
LmxM.13_543655	novel transcript	82.699	7.52288	21.301	21.699	8.52288	NA	NA	NA	NA	NA	NA	NA	NA
LmxM.13_551909	novel transcript	Inf	NA	NA	NA	26.5229	NA	NA	NA	NA	NA	NA	NA	NA
LmxM.13_555242	novel transcript	150.699	17.699	20	19.301	NA	NA	NA	NA	4	NA	2.30103	NA	NA
LmxM.13_583908	novel transcript	103.301	31.3979	61	61.301	11.0969	NA	NA	NA	NA	NA	NA	NA	NA
LmxM.14_52342	novel transcript	105	NA	14.2218	14.2218	4.69897	NA	5.22185	NA	NA	2.22185	NA	2.69897	NA
LmxM.14_93810	novel transcript	91.699	17.5229	17.699	17.2218	8.52288	NA	NA	NA	NA	NA	NA	NA	NA
LmxM.14_124480	novel transcript	169.155	NA	36.301	34.5229	NA	NA	NA	3.22185	NA	NA	2.69897	NA	NA
LmxM.14_125825	novel transcript	Inf	14.699	17.699	17.699	NA	NA	NA	NA	3	3	1.4437	NA	4.22185
LmxM.14_149986	novel transcript	98.5229	27.2218	24.5229	27.1549	8.69897	8	9.69897	NA	3	NA	2.1549	NA	NA
LmxM.14_195008	novel transcript	56.699	13.1549	9.39794	9.39794	3.39794	NA	NA	NA	NA	NA	2.04576	NA	NA
LmxM.14_199956	novel transcript	112.699	136	108	104.699	56.5229	47.0969	59.0458	14.0458	11	3.39794	NA	3.39794	NA
LmxM.14_256951	novel transcript	Inf	17	33.301	16	3.22185	NA	NA	NA	NA	NA	3	NA	NA
LmxM.14_270708	novel transcript	Inf	30.3979	NA	25.3979	18.0458	8	8.69897	23.699	NA	NA	3.1549	NA	NA
LmxM.14_353156	novel transcript	Inf	68	56.301	56.301	16	17.1549	18	NA	8.1549	NA	NA	NA	NA
LmxM.14_437441	novel transcript	Inf	85.3979	90.2218	89.5229	42.2218	34.3979	34	1.39794	10.699	NA	NA	2.30103	NA
LmxM.14_485227	novel transcript	99.1549	NA	11.3979	12	NA	NA	NA	NA	NA	NA	NA	NA	NA
LmxM.14_485950	novel transcript	26.699	10.699	NA	NA	1.37675	NA	NA	2.69897	NA	NA	NA	NA	NA
LmxM.14_549127	novel transcript	132.699	25.0969	20.2218	28	4.39794	NA	NA	NA	NA	NA	NA	NA	NA
LmxM.14_564420	novel transcript	Inf	31.3979	42.1549	42.1549	21.1549	11.699	11.0458	NA	NA	NA	2.04576	2.69897	NA
LmxM.14_575306	novel transcript	Inf	53.2218	55.5229	55.0969	16	NA	NA	NA	NA	NA	NA	NA	NA
LmxM.15_13069	novel transcript	Inf	53.2218	44.5229	45.5229	10.5229	13.5229	12.0969	NA	NA	NA	NA	NA	NA
LmxM.15_62372	novel transcript	Inf	30.301	33	33.2218	16.3979	4.52288	7.30103	NA	NA	3.69897	2.69897	NA	0.408935
LmxM.15_65992	novel transcript	Inf	28.1549	12	10.0458	6.1549	NA	3.30103	NA	NA	2.30103	NA	NA	1.63827
LmxM.15_239327	novel transcript	Inf	38.1549	42.699	42.1549	NA	5.04576	1.52288	NA	5	3.69897	NA	2.69897	NA
LmxM.15_241000	novel transcript	130.699	4.1549	8	8	NA	NA	NA	NA	NA	NA	NA	1.65758	NA
LmxM.15_253700	novel transcript	131.699	19	17.699	22	4	NA	NA	NA	1.50864	NA	NA	NA	NA
LmxM.15_308213	novel transcript	Inf	68.699	66.2218	68	14.0458	11.3979	8	8.52288	NA	NA	3	NA	NA
LmxM.15_314945	novel transcript	Inf	60	64.3979	62.699	54	23.699	23.301	3.39794	10.301	1.23657	3.09691	7.1549	NA
LmxM.15_320588	novel transcript	Inf	55	52.0969	52.0969	NA	30	30	14.0969	15.699	4	4	3.52288	3.52288
LmxM.15_409144	novel transcript	64	8	6.52288	6.52288	9.69897	1.95861	NA	2.30103	NA	NA	NA	NA	NA
LmxM.15_409624	novel transcript	83.0969	18.5229	21.301	21.2218	7.69897	NA	NA	1.67778	NA	NA	NA	NA	NA
LmxM.15_455510	novel transcript	Inf	15.5229	22.5229	22.5229	NA	NA	NA	NA	2.69897	NA	NA	4.39794	NA
LmxM.15_462642	novel transcript	70.5229	31.699	39.1549	17.2218	NA	7.04576	7.04576	NA	NA	NA	NA	NA	NA
LmxM.16_21856	novel transcript	Inf	56.301	53	53	40.3979	43.3979	44	11.699	24.699	2.39794	NA	NA	7.04576
LmxM.16_40951	novel transcript	Inf	42.699	37.3979	37.3979	13.5229	6.69897	6.69897	18.3979	NA	2.22185	3.39794	NA	NA
LmxM.16_64181	novel transcript	108.523	NA	27.2218	29.5229	10.699	NA	NA	NA	NA	NA	2.69897	1.92082	2.69897
LmxM.16_70247	novel transcript	50	24.0458	24.5229	22.5229	NA	NA	NA	3	2.69897	NA	1.92082	NA	NA
LmxM.16_78345	novel transcript	Inf	19.1549	43.699	23.5229	7	NA	2.30103	NA	NA	NA	2.04576	NA	NA
LmxM.16_152992	novel transcript	Inf	165.699	166	166.398	137	27	26.0458	24.1549	NA	6	4.52288	6.04576	NA
LmxM.16_166416	novel transcript	Inf	18	NA	19.5229	NA	NA	NA	NA	NA	2.52288	NA	NA	NA
LmxM.16_171984	novel transcript	Inf	27.3979	43.5229	45.2218	6.69897	11.1549	16.699	NA	NA	NA	NA	NA	NA
LmxM.16_190315	novel transcript	Inf	48.3979	46.5229	48.5229	11.3979	NA	NA	NA	NA	NA	NA	NA	NA
LmxM.16_224429	novel transcript	88.3979	98.0969	128	128	78.5229	NA	31.699	34	34.699	17.3979	16	16.5229	16.301
LmxM.16_260600	novel transcript	52.3979	30.5229	30.3979	31.0458	NA	NA	3.69897	2.69897	NA	2.30103	NA	NA	2.39794
LmxM.16_270128	novel transcript	146.699	21.5229	46.699	46.699	40.301	20.699	20.699	4.22185	9.30103	NA	NA	NA	NA
LmxM.16_363784	novel transcript	Inf	66.1549	72.699	72.699	7.69897	7	5	NA	NA	NA	0.619789	NA	NA
LmxM.16_381613	novel transcript	Inf	59	55	48.5229	11.1549	4.30103	5.22185	NA	NA	NA	3.1549	NA	NA
LmxM.16_403335	novel transcript	Inf	42.5229	39.0969	38	12.5229	11	11	NA	NA	NA	NA	NA	NA
LmxM.16_411322	novel transcript	Inf	73.1549	71.699	71	41.301	54.5229	55.0458	14.0458	9.69897	NA	NA	NA	NA
LmxM.16_435087	novel transcript	Inf	39.301	63.3979	64	14.699	15.0458	14.5229	NA	NA	NA	2.69897	3.52288	NA
LmxM.16_514580	novel transcript	Inf	25.0458	27.0969	27.0969	4.30103	NA	NA	NA	NA	1.79588	2.69897	NA	NA
LmxM.16_570431	novel transcript	55	20.699	16.699	17.5229	3.69897	NA	NA	NA	2.22185	NA	NA	NA	1.65758
LmxM.16_577896	novel transcript	Inf	31.699	46.301	45.5229	20.3979	6.69897	NA	NA	2.69897	NA	3.52288	NA	NA
LmxM.16_671562	novel transcript	144.222	31.0969	48.699	47.699	13.699	NA	10.3979	NA	NA	NA	1.65758	NA	NA
LmxM.17_7453	novel transcript	Inf	151.097	134	135	82.1549	88.301	72.3979	57.5229	72.699	6.69897	4	3.30103	NA
LmxM.17_28402	novel transcript	50.0969	29.0458	27.699	27.699	12.699	17.0969	17.0969	8.39794	12.3979	7.69897	8.30103	8	9.52288
LmxM.17_49120	novel transcript	Inf	67.0969	93.1549	93.699	21.5229	NA	NA	8.30103	NA	NA	NA	NA	NA
LmxM.17_56365	novel transcript	Inf	67	93.1549	93.699	21.5229	NA	NA	7.52288	NA	NA	2.1549	NA	NA
LmxM.17_85932	novel transcript	92.301	NA	37.301	37.699	14.5229	5	NA	NA	1.02687	NA	NA	3.69897	NA
LmxM.17_86737	novel transcript	Inf	NA	20.1549	32.699	25	NA	NA	NA	NA	NA	NA	NA	NA
LmxM.17_99767	novel transcript	30.0458	1.50864	NA	NA	NA	NA	1.09691	NA	NA	NA	1.23657	1.79588	1.79588
LmxM.17_100308	novel transcript	83.0458	10	14.3979	14.3979	3	2.22185	NA	2.22185	NA	NA	2.52288	NA	NA
LmxM.17_117146	novel transcript	Inf	NA	39.1549	37.5229	15.3979	NA	NA	NA	NA	NA	NA	NA	NA
LmxM.17_156476	novel transcript	168.398	74.5229	125.222	125.222	47.2218	17.5229	17.301	5	NA	2.1549	NA	1.65758	1.65758
LmxM.17_231382	novel transcript	Inf	37.699	49.699	44.699	NA	24.3979	NA	NA	NA	1.50864	NA	NA	NA
LmxM.17_369151	novel transcript	67.5229	15.699	16.3979	16.3979	3	3.1549	NA	2.69897	NA	NA	NA	3.1549	NA
LmxM.17_369929	novel transcript	79.2218	17.699	25.5229	25.5229	15.0458	5	NA	NA	NA	NA	NA	NA	NA
LmxM.17_405734	novel transcript	Inf	43.3979	47.699	47.0969	24.0969	NA	NA	NA	1.92082	NA	NA	NA	NA
LmxM.17_488879	novel transcript	139.398	37.699	59.3979	59.3979	14.301	10.1549	10.301	NA	NA	NA	NA	1.79588	NA
LmxM.17_501264	novel transcript	Inf	47.5229	56.699	56.1549	16.3979	NA	8.39794	6.69897	5.04576	1.08092	NA	NA	NA
LmxM.17_534570	novel transcript	Inf	51.699	26.699	25.5229	NA	NA	6.69897	5	NA	NA	NA	NA	NA
LmxM.17_572706	novel transcript	Inf	18.0969	21.699	21.699	NA	NA	NA	1.69897	NA	NA	3.69897	3.69897	NA
LmxM.17_574236	novel transcript	115.699	NA	NA	NA	NA	54.699	53.2218	NA	NA	NA	NA	NA	NA
LmxM.17_621073	novel transcript	Inf	52.301	NA	NA	8.09691	NA	NA	NA	NA	NA	NA	4.22185	NA
LmxM.17_634984	novel transcript	Inf	62.5229	39.0969	31.301	17.3979	10	9.30103	3.69897	NA	2.69897	NA	NA	NA
LmxM.17_640659	novel transcript	Inf	93.5229	90.0458	92.699	16.301	NA	NA	NA	NA	NA	NA	4.09691	3.39794
LmxM.17_645483	novel transcript	Inf	143	144.046	145	72.5229	45.699	NA	9.30103	NA	3.30103	2.69897	6	2.30103
LmxM.17_657706	novel transcript	Inf	92.5229	44.1549	43.3979	7.30103	8	NA	6.52288	NA	NA	3.1549	4	2.52288
LmxM.18_70806	novel transcript	Inf	42.699	44.699	44.699	14	NA	NA	NA	NA	NA	NA	NA	NA
LmxM.18_99718	novel transcript	80.3979	23.1549	23	22.3979	NA	9	6.52288	NA	NA	NA	1.85387	NA	NA
LmxM.18_161205	novel transcript	Inf	NA	22.5229	NA	NA	NA	NA	NA	NA	NA	NA	NA	NA
LmxM.18_161837	novel transcript	126.398	51	51	51.699	8.09691	NA	NA	NA	NA	NA	3	NA	NA
LmxM.18_171178	novel transcript	166	NA	20.5229	20.5229	13	15	15	4.69897	10.5229	NA	NA	3.1549	NA
LmxM.18_177636	novel transcript	Inf	31.2218	38.699	37.699	16.0458	NA	2.69897	NA	NA	NA	NA	NA	NA
LmxM.18_180919	novel transcript	Inf	NA	NA	NA	NA	6	NA	4.69897	NA	2.04576	NA	1.92082	NA
LmxM.18_241026	novel transcript	Inf	64.699	68	68.0969	58.699	66	66	51.2218	56.699	49.301	47.2218	46.699	45.5229
LmxM.18_242830	novel transcript	68	95.5229	59.2218	59.2218	46.301	36	35.301	24	29	18.1549	17	6.22185	16
LmxM.18_263081	novel transcript	Inf	65	47.0969	47.2218	NA	NA	NA	11.699	3.30103	NA	3	NA	NA
LmxM.18_292380	novel transcript	Inf	35.301	28.301	35.2218	17.699	16.301	13.699	6.09691	18.2218	2	NA	3.1549	NA
LmxM.18_353895	novel transcript	94.1549	10.2218	22	22	5.04576	NA	NA	NA	NA	2.30103	2.69897	NA	2.69897
LmxM.18_413828	novel transcript	56.2218	38.301	48.699	48.699	7	20	17.699	5.22185	NA	2.52288	4.22185	4.1549	2.52288
LmxM.18_415361	novel transcript	Inf	22.5229	29.3979	32.301	14.1549	NA	3	NA	NA	2.69897	NA	NA	NA
LmxM.18_473683	novel transcript	Inf	37.0458	41.0458	41.0458	42.2218	NA	NA	NA	NA	NA	NA	NA	NA
LmxM.18_504709	novel transcript	115.699	41.5229	41	39.699	4.52288	NA	NA	NA	NA	NA	NA	NA	NA
LmxM.18_520391	novel transcript	72.3979	15.699	15.1549	16.1549	4.1549	2.04576	NA	NA	2.69897	NA	NA	NA	NA
LmxM.18_615859	novel transcript	Inf	32.301	27	27	15.3979	12.3979	12.301	3.69897	2.39794	NA	3	0.408935	NA
LmxM.18_643513	novel transcript	Inf	47	27.699	27	12	9.22185	NA	NA	NA	3.69897	3	NA	NA
LmxM.18_655346	novel transcript	132.523	NA	27.699	27.699	12	NA	10.699	NA	NA	NA	3	NA	NA
LmxM.18_657935	novel transcript	Inf	NA	27.699	27	12	NA	10.699	NA	NA	NA	3	NA	NA
LmxM.18_675446	novel transcript	157.097	NA	42.0969	39.2218	NA	NA	NA	NA	4.52288	NA	NA	NA	NA
LmxM.18_688693	novel transcript	Inf	39.3979	41.0458	40.0458	22.699	NA	NA	NA	1.88606	NA	NA	NA	NA
LmxM.19_54682	novel transcript	98.699	36.699	37.3979	38.699	6.09691	7.39794	7.39794	5	NA	NA	NA	NA	NA
LmxM.19_188905	novel transcript	Inf	126.523	108.222	98	116.699	130.222	130.699	87.3979	87.699	57.5229	69.2218	70.0969	3
LmxM.19_206209	novel transcript	92.0458	NA	23.5229	NA	11	NA	NA	5	NA	NA	3.22185	NA	NA
LmxM.19_326858	novel transcript	36.1549	10	6.04576	9.1549	3	NA	NA	2.09691	1.79588	NA	1.65758	1.74473	NA
LmxM.19_368398	novel transcript	157.398	22.699	29.699	26	14.699	NA	2.69897	NA	NA	1.25964	NA	NA	NA
LmxM.19_374598	novel transcript	143.398	59	57.1549	56.3979	17.699	NA	NA	NA	NA	NA	NA	NA	NA
LmxM.19_375604	novel transcript	Inf	72.699	65.3979	65	24.0458	5.52288	6	NA	20.3979	2.52288	NA	NA	NA
LmxM.19_387402	novel transcript	177.699	21.699	25.5229	25.5229	NA	9.39794	6	NA	NA	2.69897	3.69897	2.04576	NA
LmxM.19_419800	novel transcript	110.097	NA	11	11.5229	NA	NA	NA	0.958607	2.04576	NA	NA	NA	NA
LmxM.19_504972	novel transcript	109.155	40.699	42.3979	42.3979	NA	NA	6.69897	NA	NA	4.39794	NA	2.69897	NA
LmxM.19_508125	novel transcript	102.222	NA	25.0969	25.0969	NA	NA	NA	NA	NA	1.52288	NA	NA	NA
LmxM.19_536374	novel transcript	Inf	51.1549	NA	NA	6.39794	NA	23.0969	17.699	5.69897	2.09691	NA	NA	NA
LmxM.19_556429	novel transcript	Inf	34.5229	NA	NA	15.5229	10.699	NA	NA	7.69897	NA	NA	3	NA
LmxM.19_571839	novel transcript	Inf	59.301	71.699	75.0969	19.301	9.69897	NA	NA	NA	NA	3	NA	NA
LmxM.19_598518	novel transcript	167.301	50.699	51.0969	51.5229	22.699	23	9.69897	15.1549	NA	2.30103	NA	2.30103	NA
LmxM.19_610226	novel transcript	Inf	43.1549	45.699	45.699	NA	NA	NA	NA	NA	NA	NA	3.30103	NA
LmxM.19_618646	novel transcript	Inf	34.5229	27.699	40.699	16.301	11.5229	NA	14	7.69897	9.39794	9.30103	3	NA
LmxM.19_643695	novel transcript	Inf	99.301	87.1549	87.1549	45.699	21.699	21.699	11.5229	20.0969	NA	3.69897	NA	NA
LmxM.19_646700	novel transcript	Inf	161.699	Inf	Inf	151.699	95.0458	NA	30	NA	7.1549	3.52288	NA	14.699
LmxM.20_9649	novel transcript	Inf	37.1549	35.3979	35.5229	11.699	NA	NA	NA	NA	1.95861	2.69897	NA	1.38722
LmxM.20_12400	novel transcript	Inf	17.3979	44	37.3979	8	8.69897	7.04576	7	NA	NA	3.1549	NA	NA
LmxM.20_46795	novel transcript	174.398	30.699	45	45	NA	NA	13.301	NA	5	2.52288	2.04576	NA	NA
LmxM.20_51642	novel transcript	112	48	48	47.301	10.699	13.3979	12.301	NA	NA	NA	3	NA	2.22185
LmxM.20_102366	novel transcript	Inf	70.699	46.2218	74	20	20.5229	18.699	1.79588	10.301	NA	NA	NA	5.39794
LmxM.20_106394	novel transcript	142.699	99.3979	88	104.523	62.699	65.699	65.5229	13.699	49	NA	NA	1.65758	4.09691
LmxM.20_110143	novel transcript	Inf	37.699	37	40.1549	22.699	NA	14	NA	NA	NA	NA	NA	NA
LmxM.20_193241	novel transcript	Inf	NA	42.0458	NA	29.5229	NA	16.301	11.0458	NA	NA	4.39794	NA	NA
LmxM.20_271891	novel transcript	Inf	41.699	35.301	33.0969	NA	11.2218	10.699	13.699	NA	NA	6	NA	NA
LmxM.20_344708	novel transcript	Inf	35.0969	69.699	69.3979	13.301	15	NA	29.1549	2.69897	NA	3.30103	NA	NA
LmxM.20_458201	novel transcript	48.3979	6.30103	7.69897	7.69897	NA	NA	NA	NA	3.69897	NA	0.259637	NA	NA
LmxM.20_467545	novel transcript	Inf	NA	27.2218	28.5229	NA	NA	NA	NA	NA	2.22185	3	NA	NA
LmxM.20_494843	novel transcript	Inf	21.1549	20.699	21.3979	9	11.5229	11.699	7	NA	NA	2.22185	NA	3
LmxM.20_562287	novel transcript	Inf	48	49.699	49.699	10.699	3.30103	NA	NA	4	NA	NA	NA	NA
LmxM.20_581013	novel transcript	Inf	32.1549	25.1549	25	5	NA	NA	NA	2.39794	NA	1.49485	NA	NA
LmxM.20_586029	novel transcript	Inf	34.0458	31.3979	23.699	8.1549	NA	NA	NA	NA	NA	NA	NA	NA
LmxM.20_6Inf46	novel transcript	Inf	38	29	29	7.52288	6.04576	6.04576	1.23657	NA	NA	2.04576	4.52288	NA
LmxM.20_635302	novel transcript	Inf	29.301	51.5229	53.2218	24.1549	7.69897	9.22185	4.39794	NA	NA	2.69897	NA	NA
LmxM.20_636519	novel transcript	Inf	18.699	16.699	17.5229	7.1549	NA	NA	5.09691	NA	NA	4	NA	NA
LmxM.20_653105	novel transcript	162.699	17.301	30	32.3979	6.69897	6.04576	6.04576	NA	NA	1.20066	NA	NA	NA
LmxM.20_714688	novel transcript	Inf	12	16.0969	15.301	NA	NA	NA	0.958607	NA	2.69897	3.69897	NA	NA
LmxM.20_757446	novel transcript	Inf	38.0458	37	37	16.699	13.3979	13	NA	NA	NA	NA	NA	NA
LmxM.20_774588	novel transcript	Inf	70	103.523	103.301	37.699	36.5229	38.699	37.3979	NA	0.420216	3.30103	2.52288	NA
LmxM.20_812371	novel transcript	Inf	26	29	13	11	NA	NA	NA	6.39794	2.30103	2.69897	NA	NA
LmxM.20_831052	novel transcript	137	48.2218	50	50	14.5229	12	15.699	14.0458	NA	NA	NA	3.1549	NA
LmxM.20_845235	novel transcript	Inf	49.1549	40.5229	51	23.0969	14.699	14.699	NA	6.52288	NA	3.1549	NA	NA
LmxM.20_921612	novel transcript	Inf	34	41.699	41	11.1549	NA	NA	NA	NA	2	NA	1.85387	0.677781
LmxM.20_940055	novel transcript	Inf	35.699	27.699	26.699	NA	5.69897	8	10.2218	NA	NA	3	NA	NA
LmxM.20_942821	novel transcript	Inf	110	105.699	107	79.301	86.5229	46.0969	NA	24.0458	2.52288	3.30103	2.52288	NA
LmxM.20_944055	novel transcript	Inf	56	51.0969	48.1549	22.5229	5.69897	16	18.301	NA	NA	2.69897	NA	NA
LmxM.20_959907	novel transcript	Inf	109.097	95.3979	95.2218	20.3979	13.699	13.301	30	NA	NA	3.39794	NA	NA
LmxM.20_973853	novel transcript	Inf	66.3979	64	64	57.2218	28.699	28.699	10.699	22.5229	3.1549	NA	NA	NA
LmxM.20_1062583	novel transcript	136.523	105.699	41.1549	63.301	54.1549	32.699	33.5229	NA	NA	2.04576	NA	NA	NA
LmxM.20_1063565	novel transcript	84	68.0969	NA	44.0969	54.1549	25.5229	26	10.699	46	2.04576	1.88606	NA	NA
LmxM.20_1070775	novel transcript	Inf	82	91	91.699	38.3979	15.699	14.0969	11.699	NA	NA	2.69897	2.39794	3.69897
LmxM.20_1071799	novel transcript	164	NA	67.0969	67.3979	36.699	11.3979	11.699	NA	2.22185	3	NA	NA	NA
LmxM.20_1097972	novel transcript	Inf	116.222	105.699	105.523	26	NA	NA	NA	NA	NA	3.30103	NA	NA
LmxM.20_1111292	novel transcript	Inf	59	60.5229	60.5229	28	43.5229	43.5229	18.0969	29.699	3.69897	3	3.69897	11
LmxM.20_1168165	novel transcript	133	61	62.1549	63	49	40.699	40.699	21.0969	26	10.301	6.09691	NA	13.5229
LmxM.20_1199406	novel transcript	Inf	46	108	108.301	33	NA	NA	17.3979	NA	NA	3.22185	NA	0.267606
LmxM.20_1210756	novel transcript	127.523	82	75.0969	75.0969	39.301	36.699	36.5229	11.3979	33.0969	2.22185	NA	NA	1.37675
LmxM.20_1225701	novel transcript	179.097	105.301	117	116.155	23.1549	32.3979	37	4	24.3979	NA	3	NA	NA
LmxM.20_1229298	novel transcript	105.523	86.3979	96	96	73.5229	61.3979	61.3979	65	67.301	32.2218	30	38.0458	36.2218
LmxM.20_1290864	novel transcript	162.222	103.398	123.046	122	61.699	56.3979	57	18.0969	29	NA	3.1549	NA	2.30103
LmxM.20_1313045	novel transcript	104.699	36	39.3979	39.3979	30.699	15.2218	15.1549	11.301	15	0.267606	1.92082	NA	1.95861
LmxM.20_1362417	novel transcript	Inf	38.3979	83.699	82.699	54.5229	37.0458	38.3979	NA	17.2218	3	NA	NA	5
LmxM.20_1363843	novel transcript	Inf	56.5229	66.3979	67.699	13.301	5.39794	4	NA	NA	3.52288	2.69897	3.1549	NA
LmxM.20_1370056	novel transcript	103	15	30.0969	30	NA	NA	2.22185	NA	NA	NA	2.69897	NA	1.10237
LmxM.20_1444735	novel transcript	145	73.2218	82.1549	53	20	25.2218	26.2218	NA	4.1549	NA	NA	2.30103	1.65758
LmxM.20_1498256	novel transcript	Inf	78.2218	71	72	56.2218	34.5229	30.0458	NA	NA	NA	NA	NA	NA
LmxM.20_1505073	novel transcript	67.1549	20.699	40.1549	41	NA	NA	NA	2.30103	1.65758	1.79588	1.92082	NA	2.22185
LmxM.20_1559792	novel transcript	106.523	15.0458	17.699	17.3979	8.69897	5.09691	4.39794	NA	NA	NA	2.69897	NA	NA
LmxM.20_1610511	novel transcript	Inf	26.5229	27.699	27.699	23.5229	2.39794	NA	NA	NA	NA	2.69897	NA	1.65758
LmxM.20_1613591	novel transcript	Inf	70.699	54.2218	56.699	39.0458	NA	NA	NA	NA	NA	1.92082	1.37675	NA
LmxM.20_1633792	novel transcript	Inf	63.3979	41	41.3979	39.0458	NA	NA	NA	NA	NA	2.69897	NA	NA
LmxM.20_1688243	novel transcript	Inf	77.699	88	93	21.1549	6	11.5229	17.1549	NA	NA	NA	12.301	NA
LmxM.20_1770633	novel transcript	Inf	14.2218	33	38.699	10	NA	NA	NA	NA	2.69897	NA	NA	NA
LmxM.20_1773620	novel transcript	Inf	20.699	17.3979	16.699	2.69897	NA	NA	NA	NA	NA	NA	NA	NA
LmxM.20_1803986	novel transcript	Inf	92	89	87.0969	86.3979	68.699	66.699	53.5229	65.5229	27.2218	21.0969	40.0969	NA
LmxM.20_1844350	novel transcript	116.523	13.699	10.699	25.699	4	NA	NA	NA	NA	NA	NA	NA	NA
LmxM.20_1875431	novel transcript	Inf	50.2218	58	57.699	11	NA	0.823909	23.1549	26	NA	NA	NA	NA
LmxM.20_1895489	novel transcript	Inf	77.3979	118.523	126.699	NA	NA	2.30103	NA	2.39794	2.69897	3	1.95861	NA
LmxM.20_1912339	novel transcript	128.523	31.0969	38.5229	38.5229	11.3979	NA	NA	NA	NA	2.69897	NA	NA	NA
LmxM.20_1949744	novel transcript	Inf	49.3979	63.2218	62.699	8.22185	28.3979	14.3979	NA	NA	NA	1.79588	NA	1.92082
LmxM.20_2158143	novel transcript	Inf	41.699	30.301	30.0458	5.69897	NA	NA	NA	5.09691	3.39794	2.22185	NA	NA
LmxM.20_2177943	novel transcript	165	35.2218	34.699	34.301	29	24.1549	24.1549	24.301	25	7	7	8.1549	22.0969
LmxM.20_2212061	novel transcript	Inf	44	47.301	49.5229	16.5229	11.3979	10.0969	NA	3	NA	NA	NA	NA
LmxM.20_2229589	novel transcript	169.699	44.699	18.2218	44.3979	9.22185	NA	NA	NA	NA	2.52288	1.79588	1.79588	NA
LmxM.20_2237840	novel transcript	Inf	31.0458	47.699	30.699	11.699	6.09691	4.30103	NA	NA	NA	NA	2.22185	NA
LmxM.20_2249082	novel transcript	Inf	52.699	42.2218	27.699	7.30103	12	NA	NA	1.65758	NA	2.52288	NA	NA
LmxM.20_2297902	novel transcript	Inf	90	105.699	101.523	64.1549	56.301	55.5229	NA	40.699	NA	2.52288	NA	NA
LmxM.20_2305504	novel transcript	Inf	31.699	35	34.1549	9	5.69897	5.69897	NA	NA	NA	1.92082	1.65758	NA
LmxM.20_2309332	novel transcript	169.699	23.5229	30	28.301	12	NA	NA	NA	4.69897	NA	1.92082	NA	NA
LmxM.20_2317829	novel transcript	Inf	44.0969	42.2218	42.301	34.5229	27	27.0969	6.52288	6.69897	6.1549	6	7.52288	5
LmxM.20_2327341	novel transcript	Inf	84.699	87.699	87.699	73	37	35	7.52288	12.699	NA	4.52288	NA	4.39794
LmxM.20_2405401	novel transcript	Inf	NA	70.2218	70.2218	53.0969	18.699	14.0458	NA	9.52288	NA	NA	NA	NA
LmxM.20_2407776	novel transcript	Inf	34	36	40.0458	7.1549	NA	9.69897	NA	4.30103	NA	3.09691	NA	1.0315Inf5144606
LmxM.20_2427290	novel transcript	174	73.699	98.0458	98.0458	42	46.301	39.3979	10.699	21.301	2.09691	NA	NA	NA
LmxM.20_2430904	novel transcript	Inf	42.3979	76.699	75.699	13.699	NA	NA	NA	NA	NA	5.09691	NA	NA
LmxM.20_2434879	novel transcript	81.699	27	19.3979	19.1549	20.699	18	18.699	15.5229	18	12.699	12	13.0969	15
LmxM.20_2438384	novel transcript	Inf	27.0969	54	54.2218	31	NA	9.69897	7	3	NA	NA	NA	NA
LmxM.20_2449833	novel transcript	118.699	57	57.2218	57.699	34.5229	40	36	18.3979	26.699	5.22185	NA	7.1549	5.69897
LmxM.20_2472480	novel transcript	Inf	NA	37	NA	24.5229	14.699	5.22185	NA	NA	2.22185	NA	NA	NA
LmxM.20_2481909	novel transcript	122.301	28	33.0969	33.699	17.301	NA	NA	NA	NA	NA	NA	NA	NA
LmxM.20_2498710	novel transcript	Inf	41.699	47.699	48.699	54.2218	7.52288	7.52288	NA	NA	2.69897	3.1549	NA	NA
LmxM.20_2523937	novel transcript	Inf	103	92.5229	97.3979	54.301	49	48.699	41.5229	51.3979	NA	4.69897	NA	NA
LmxM.20_2539713	novel transcript	157.523	77.699	83.5229	83.5229	63.5229	54.699	55.5229	46.3979	52.1549	33.3979	35	NA	34.3979
LmxM.20_2551268	novel transcript	83.5229	14.3979	13	NA	NA	NA	NA	NA	NA	0.408935	2.52288	NA	NA
LmxM.20_2600780	novel transcript	178.155	67.699	72.5229	72	41.3979	45	NA	36.0969	30	6.04576	6.04576	2.69897	5.39794
LmxM.20_2628420	novel transcript	152.699	113.523	108.523	108.523	84.5229	86	NA	NA	66.2218	NA	NA	3	NA
LmxM.20_2662569	novel transcript	120	22.3979	28.699	27.699	NA	NA	NA	NA	4.69897	NA	NA	NA	NA
LmxM.20_2675633	novel transcript	150.523	22.301	36.3979	36.3979	18	5.69897	4.69897	16	NA	7.30103	7.09691	10.0969	NA
LmxM.20_2748015	novel transcript	153.699	39.1549	11.2218	NA	NA	NA	NA	NA	NA	5.04576	NA	2.22185	NA
LmxM.20_2780430	novel transcript	135.301	17.1549	21.3979	21.301	NA	NA	NA	NA	NA	NA	NA	NA	NA
LmxM.20_2794585	novel transcript	Inf	116	137.398	136.097	36.301	24.699	63.5229	NA	17.699	NA	3	NA	NA
LmxM.20_2819583	novel transcript	164	57.5229	62.699	59.699	52.2218	37.699	37.5229	29.699	35.2218	19	16.699	17.5229	12.0458
LmxM.20_2954228	novel transcript	Inf	54	77.3979	33	24.2218	23	20.699	NA	18.699	NA	NA	NA	-0.30103
LmxM.20_3000687	novel transcript	77.699	10.699	13.699	13.699	8.52288	2.30103	2.52288	3	NA	NA	2.22185	NA	NA
LmxM.20_3038988	novel transcript	Inf	66.5229	41.301	42.699	NA	9.69897	10	NA	NA	NA	NA	1.92082	3.52288
LmxM.20_3261095	novel transcript	131.301	44.301	36.2218	36.2218	19.699	24.301	24.301	6.22185	15.0458	NA	3	NA	NA
LmxM.20_3337971	novel transcript	Inf	NA	18	21.0458	NA	56	NA	44	NA	NA	NA	NA	NA
LmxM.20_3339389	novel transcript	Inf	Inf	Inf	Inf	163.699	NA	NA	NA	NA	NA	NA	NA	NA
LmxM.20_3343047	novel transcript	178	29.5229	52.3979	52.0969	4.09691	6.52288	5	NA	NA	NA	NA	NA	NA
LmxM.21_121180	novel transcript	54.699	14.0969	13.699	13.699	1.20066	1.95861	NA	NA	2.22185	2.69897	NA	2.22185	NA
LmxM.21_256185	novel transcript	Inf	80.2218	74.301	74.301	33.2218	20.0969	24.699	3.30103	3.39794	2.22185	2.22185	NA	NA
LmxM.21_272356	novel transcript	119.301	24	30.0969	22	1.24413	NA	NA	NA	NA	NA	3.1549	2.30103	NA
LmxM.21_327387	novel transcript	68.3979	21.699	20.1549	20.1549	5	NA	NA	NA	NA	NA	1.92082	0.124939	NA
LmxM.21_329171	novel transcript	95.699	16.301	17.1549	15.699	4.1549	NA	NA	4	5	NA	NA	NA	NA
LmxM.21_369741	novel transcript	129.398	NA	NA	NA	12.3979	NA	NA	NA	NA	NA	NA	NA	33.5229
LmxM.21_516035	novel transcript	Inf	42	20.699	20.5229	NA	7.04576	NA	NA	4.39794	NA	NA	NA	NA
LmxM.21_529411	novel transcript	168.155	24.2218	23.699	23.699	5.52288	5.52288	4.04576	4.30103	NA	NA	NA	NA	NA
LmxM.21_551918	novel transcript	115.222	NA	NA	NA	9.1549	NA	NA	NA	NA	2.30103	2.04576	2.69897	NA
LmxM.21_599333	novel transcript	Inf	44.5229	47.2218	47.5229	8.69897	NA	NA	NA	NA	2.52288	NA	NA	NA
LmxM.21_727645	novel transcript	Inf	69	86.2218	86.2218	42.0458	5.39794	4.52288	8.69897	NA	NA	NA	3	NA
LmxM.22_48680	novel transcript	148.222	57.0458	106.398	107.301	46.301	19.699	19.699	11.699	35.301	8	3	8.39794	7.52288
LmxM.22_59452	novel transcript	Inf	47.301	62.5229	62.5229	24.699	NA	NA	11.5229	NA	NA	2.30103	NA	NA
LmxM.22_64329	novel transcript	Inf	41	45	45.699	8.1549	NA	NA	NA	NA	NA	NA	NA	NA
LmxM.22_105225	novel transcript	Inf	NA	NA	NA	7.30103	NA	NA	NA	2.09691	NA	NA	4	NA
LmxM.22_168291	novel transcript	Inf	22.699	18.2218	21.699	9.52288	NA	NA	NA	NA	3.1549	NA	NA	NA
LmxM.22_285163	novel transcript	Inf	NA	NA	NA	16.301	14.301	NA	NA	3	0.552842	NA	2.52288	NA
LmxM.22_329310	novel transcript	134.222	59.0458	51.0969	50.5229	50.0969	44.1549	44.1549	34.0969	36.301	31.2218	31	32.699	32.5229
LmxM.22_347318	novel transcript	159.301	33.5229	21.2218	21.2218	12	4	4	NA	1.67778	NA	NA	NA	2.30103
LmxM.22_347933	novel transcript	141.699	22	24	19.0458	19.301	12.0458	8.30103	NA	10	NA	1.48149	NA	NA
LmxM.22_356159	novel transcript	163.699	40	28.5229	44	5.22185	NA	NA	NA	NA	NA	2.69897	NA	NA
LmxM.22_374833	novel transcript	89.5229	11	12.699	12.699	1.92082	NA	NA	0.823909	NA	NA	NA	NA	NA
LmxM.22_389830	novel transcript	105.155	28.699	21.2218	20.699	16.5229	3.52288	2.52288	NA	NA	NA	NA	NA	NA
LmxM.22_521095	novel transcript	Inf	87.0969	55.0969	55.0458	23.2218	14.699	17.3979	NA	NA	NA	4.39794	NA	NA
LmxM.22_563485	novel transcript	Inf	21.1549	23.699	23.699	8.69897	NA	NA	NA	3.39794	NA	3	NA	NA
LmxM.22_623716	novel transcript	Inf	114.699	113	112	53.2218	75.5229	75.5229	9.30103	12.699	NA	4.04576	NA	NA
LmxM.22_663491	novel transcript	90.699	29	28.699	28.5229	5.69897	NA	7.1549	NA	3.39794	2.04576	NA	NA	NA
LmxM.23_56346	novel transcript	Inf	29.699	23.699	24.1549	9.69897	NA	NA	15.301	NA	NA	NA	3.1549	NA
LmxM.23_70612	novel transcript	Inf	71.0458	68.699	68.5229	13.3979	NA	7	NA	NA	NA	NA	NA	3
LmxM.23_78483	novel transcript	Inf	NA	59.2218	59.2218	26.5229	NA	NA	4.1549	NA	NA	5	NA	NA
LmxM.23_82439	novel transcript	153	48.301	51	51	46.0969	35.0969	35	19.3979	27	3.69897	2.69897	3.39794	NA
LmxM.23_83444	novel transcript	141.398	NA	59.699	59.3979	26.5229	NA	20.699	4.1549	NA	NA	NA	NA	NA
LmxM.23_96647	novel transcript	Inf	41	85.699	86	26.5229	21.3979	NA	NA	NA	NA	NA	2.69897	NA
LmxM.23_120147	novel transcript	119.699	29	15.301	16	NA	NA	11.1549	1.85387	3.30103	NA	NA	NA	2.52288
LmxM.23_125755	novel transcript	Inf	49.3979	60.5229	61.699	42.3979	24.1549	23.2218	6.30103	23.699	NA	2.69897	3	NA
LmxM.23_166383	novel transcript	Inf	35.301	46.699	47	NA	NA	6.22185	NA	NA	4.52288	NA	NA	NA
LmxM.23_177418	novel transcript	118.046	44.3979	43	43	23.5229	29.3979	28.3979	6.52288	24.301	2.22185	3.39794	NA	NA
LmxM.23_240210	novel transcript	Inf	61.5229	44	50.699	12.3979	19.5229	NA	NA	NA	NA	NA	NA	1.74473
LmxM.23_246025	novel transcript	121.155	19	21.0458	19.699	NA	NA	NA	NA	NA	2.1549	NA	NA	NA
LmxM.23_279558	novel transcript	Inf	115.699	106.046	131	35	NA	14	NA	12.301	NA	4.22185	NA	NA
LmxM.23_402577	novel transcript	Inf	20.301	13.5229	16.301	11.0969	9.04576	6.69897	10.5229	NA	NA	2.69897	NA	3.69897
LmxM.23_452864	novel transcript	Inf	42	24.0458	22.0969	NA	NA	NA	NA	NA	NA	NA	NA	NA
LmxM.23_513609	novel transcript	Inf	Inf	Inf	Inf	NA	NA	NA	67.699	NA	NA	NA	NA	32
LmxM.23_527740	novel transcript	Inf	58.3979	90	90	24	18.699	16	38.3979	NA	NA	NA	21.5229	NA
LmxM.23_565432	novel transcript	Inf	176	Inf	Inf	57.5229	45.3979	53.699	23.699	53	5.69897	6.22185	5	8.69897
LmxM.23_576910	novel transcript	160	89.301	108.699	108.301	67.1549	36	47.301	19.699	14.5229	5.39794	7.39794	4.69897	8
LmxM.23_583070	novel transcript	Inf	34.699	36	36.699	4.52288	NA	NA	1.65758	2.04576	3.30103	2.22185	NA	NA
LmxM.23_694708	novel transcript	171.155	45.5229	36	36	14	7.30103	6.09691	NA	NA	NA	NA	NA	NA
LmxM.23_701025	novel transcript	Inf	91.1549	66.699	112.523	63.2218	70.5229	70.0458	49.2218	53.0458	NA	NA	NA	NA
LmxM.23_710794	novel transcript	Inf	28.0969	33.5229	47.699	NA	NA	NA	NA	NA	3.69897	3.52288	2.22185	2.04576
LmxM.23_734052	novel transcript	Inf	70	138.155	136.699	30.301	6.52288	15.301	4.69897	NA	NA	2.52288	NA	0.677781
LmxM.24_41292	novel transcript	156.523	11.699	40	38.5229	9.69897	2.09691	2.09691	NA	NA	NA	NA	NA	1.50864
LmxM.24_104794	novel transcript	88	24	24.699	24.699	7.30103	5.52288	6.22185	NA	NA	1.92082	NA	1.92082	NA
LmxM.24_105643	novel transcript	110.398	32.3979	30.301	30.301	NA	13.2218	13	3.30103	3.30103	5	6.52288	6.04576	NA
LmxM.24_127852	novel transcript	107.699	20.0969	33.301	34.2218	2.69897	10.2218	NA	NA	NA	NA	2.04576	NA	NA
LmxM.24_145283	novel transcript	94.699	31.301	21	21	NA	NA	12.699	NA	1.92082	5	5.69897	6.04576	NA
LmxM.24_272373	novel transcript	157.222	16.0458	28.699	28.699	5.39794	6	5.69897	4.69897	NA	3	2.39794	NA	3
LmxM.24_338522	novel transcript	37.3979	17.699	17.0969	17.0969	2.30103	NA	NA	NA	NA	NA	1.23657	NA	NA
LmxM.24_391860	novel transcript	Inf	64.5229	56.699	57.301	32.2218	30	38.5229	11.5229	14.301	6.04576	6	7.52288	5.69897
LmxM.24_394745	novel transcript	168.398	52.3979	48.0969	48.0969	17.5229	29.301	28.5229	4	9.39794	NA	2.1549	NA	NA
LmxM.24_406696	novel transcript	Inf	126.398	143	143	106.699	120	117.301	70	88.5229	6.30103	6	6	16.5229
LmxM.24_420029	novel transcript	Inf	179.523	Inf	Inf	109.301	NA	NA	NA	40	NA	NA	2.04576	NA
LmxM.24_453549	novel transcript	Inf	NA	17.2218	17.699	NA	NA	NA	NA	NA	NA	3.30103	4	3.39794
LmxM.24_458285	novel transcript	Inf	49.699	50	51	9.09691	8.30103	9	13.2218	NA	3	2.30103	NA	NA
LmxM.24_486376	novel transcript	179	139.523	136.222	138.222	101.523	96.699	97	65.699	67.0969	NA	NA	10	27.699
LmxM.24_528120	novel transcript	Inf	56.699	47.3979	NA	14.0969	NA	NA	NA	NA	2.39794	NA	3	NA
LmxM.24_560561	novel transcript	149.155	28	47.699	49	3.09691	NA	1.50864	NA	NA	3	3.04576	NA	NA
LmxM.24_599643	novel transcript	Inf	54	NA	68.3979	14.0969	NA	NA	NA	NA	NA	NA	0.69897	NA
LmxM.24_620343	novel transcript	172.699	27.5229	25.5229	24.5229	16	9.69897	1.92082	17	NA	2.69897	2.52288	NA	NA
LmxM.24_663344	novel transcript	Inf	17.699	22	21.0969	8	NA	NA	NA	NA	NA	NA	NA	NA
LmxM.24_791559	novel transcript	121	31.0458	30.0969	29.699	9.30103	3.69897	3.30103	NA	NA	3.69897	NA	2.52288	1.79588
LmxM.24_804446	novel transcript	102	28.3979	23.3979	21.699	24.3979	18.1549	17.699	NA	17.3979	2.30103	7.69897	7.52288	9.69897
LmxM.24_805244	novel transcript	88.5229	20	45	31.699	21.0969	19.699	17	17.0969	17	2.52288	9	5.69897	9.52288
LmxM.24_806159	novel transcript	152	39.301	39.5229	38.5229	25.1549	NA	16.699	16.3979	17	2.30103	7.04576	6.30103	10.301
LmxM.25_6182	novel transcript	Inf	39.5229	31.3979	31.1549	NA	20	NA	NA	NA	NA	NA	NA	NA
LmxM.25_28539	novel transcript	133.046	23.5229	23.699	23.699	15.0458	13.699	13.699	5.69897	10.0458	NA	NA	NA	NA
LmxM.25_30648	novel transcript	115.523	27.699	29.0458	29.0458	23.0458	21	22	20.1549	21	12.3979	12.301	1.37675	8.39794
LmxM.25_48063	novel transcript	57.1549	35.2218	32.5229	32.5229	3.39794	NA	NA	NA	NA	3	NA	NA	NA
LmxM.25_142032	novel transcript	Inf	39.699	NA	28.5229	17	NA	NA	11	NA	2.22185	NA	NA	NA
LmxM.25_177444	novel transcript	Inf	21.301	22.1549	23.3979	NA	NA	NA	NA	NA	NA	NA	NA	NA
LmxM.25_200742	novel transcript	Inf	63	62.1549	62.1549	59.699	52.301	51.3979	29	44.0458	7.30103	4	6.09691	11.5229
LmxM.25_248355	novel transcript	Inf	37.0969	33.699	33.699	16.301	11.301	11.0969	NA	NA	NA	3.52288	NA	NA
LmxM.25_253118	novel transcript	129.523	95	95.3979	95.3979	84.3979	74.301	73.699	67.3979	75.1549	NA	NA	NA	56
LmxM.25_281746	novel transcript	162	29.0969	34	34	6.69897	NA	2.30103	NA	4.30103	NA	4.69897	NA	NA
LmxM.25_305725	novel transcript	62.0969	11.301	11.0969	10.699	NA	NA	NA	NA	NA	NA	NA	0.823909	NA
LmxM.25_372173	novel transcript	125	22.699	24.5229	23.5229	13.0969	NA	5.39794	3.52288	NA	NA	3.52288	NA	NA
LmxM.25_386669	novel transcript	Inf	39.301	37	52.699	24.5229	24.699	24.699	NA	4.39794	NA	2.1549	NA	3
LmxM.25_439249	novel transcript	Inf	19	26	22.699	10	NA	NA	5.39794	NA	NA	NA	NA	NA
LmxM.25_449489	novel transcript	Inf	21.0458	NA	22.699	NA	NA	NA	NA	NA	2.1549	NA	4	NA
LmxM.25_564481	novel transcript	Inf	81.699	82.301	83.0969	59.301	45.5229	44.699	27.699	23.1549	3	NA	NA	4
LmxM.25_592664	novel transcript	Inf	37.1549	39.2218	39.2218	8.52288	8	8	4.39794	NA	NA	NA	NA	0.275724
LmxM.25_721319	novel transcript	147.222	41.699	28	26.699	10.699	3	4	7.1549	NA	2.69897	NA	NA	NA
LmxM.25_832296	novel transcript	Inf	47.5229	37.699	41.301	14.0458	NA	19.699	NA	NA	2.39794	NA	NA	3.69897
LmxM.25_858431	novel transcript	Inf	68.0458	85	85	41	41.699	40.5229	NA	15.1549	NA	NA	3.30103	2.69897
LmxM.25_878347	novel transcript	Inf	138.523	135.301	136	16.1549	18.699	17.699	96.699	103.301	NA	2.22185	3	13
LmxM.25_880184	novel transcript	179	NA	NA	NA	4.09691	6.52288	5	NA	NA	NA	NA	NA	NA
LmxM.26_15433	novel transcript	Inf	104.699	81	81	47.3979	37.301	38	46.2218	NA	13.699	22.2218	NA	NA
LmxM.26_22975	novel transcript	128.222	28.5229	22.699	36.3979	7.39794	6.69897	5.69897	7.69897	NA	NA	NA	7	5
LmxM.26_39325	novel transcript	Inf	33.699	27.301	27	9.30103	8.09691	4	NA	NA	NA	NA	NA	NA
LmxM.26_43651	novel transcript	124.699	18.5229	21.0458	20	NA	NA	NA	NA	NA	NA	2.30103	NA	NA
LmxM.26_47059	novel transcript	122.301	20.2218	11.0969	1.13077	NA	NA	NA	NA	NA	NA	3.1549	2.69897	NA
LmxM.26_53843	novel transcript	90.699	13.0969	31.301	31.301	4	4	4	NA	NA	NA	1.50864	NA	NA
LmxM.26_99200	novel transcript	Inf	19.301	NA	NA	14.699	NA	NA	NA	2.39794	NA	NA	NA	NA
LmxM.26_133776	novel transcript	Inf	27.1549	24.5229	24.5229	32.5229	29.699	28.2218	9.09691	17.301	2.69897	4.30103	NA	NA
LmxM.26_152311	novel transcript	Inf	24.3979	87	86.1549	15	12.1549	13.0969	NA	NA	NA	3.1549	2.69897	1.92082
LmxM.26_217909	novel transcript	Inf	102.699	57	57	45	12.301	28.1549	16.0458	18.0458	8	7.69897	10.3979	1.24413
LmxM.26_221196	novel transcript	129.222	22.1549	25	25	4.39794	NA	9.22185	NA	NA	NA	NA	NA	1.4437
LmxM.26_512878	novel transcript	81.5229	37	38.699	40.0458	30.301	28.699	28.699	5.09691	15.301	3.52288	NA	NA	NA
LmxM.26_588584	novel transcript	Inf	132.301	98.699	98.699	122.301	75	75.0458	7.09691	20.2218	NA	2.30103	2.30103	-0.278754
LmxM.26_597009	novel transcript	Inf	42	34.2218	46	20	8.22185	9.22185	6.30103	NA	7.1549	NA	7.52288	NA
LmxM.26_686728	novel transcript	126.699	22.0969	14.2218	9	6.30103	NA	NA	NA	NA	2.69897	NA	2.69897	NA
LmxM.26_699044	novel transcript	161.699	39	38.0458	38.0458	19.3979	NA	NA	NA	2.69897	2.30103	2	NA	NA
LmxM.26_762685	novel transcript	126.699	13.5229	22.699	22.699	NA	NA	4	2.69897	NA	NA	NA	NA	NA
LmxM.26_814244	novel transcript	Inf	119.046	128	128.155	46.301	23.3979	23.0969	5	14	2.52288	NA	NA	NA
LmxM.26_835753	novel transcript	125.699	83.1549	96.3979	97	52.699	37	37	21.2218	30.3979	9.09691	NA	2.52288	11.2218
LmxM.26_852982	novel transcript	64.3979	24	22	22.2218	9.04576	NA	3.30103	NA	NA	NA	NA	NA	NA
LmxM.26_971146	novel transcript	Inf	80.3979	93.0969	89.699	54.699	43.1549	44.301	5.69897	25.5229	NA	NA	3	10.2218
LmxM.26_985363	novel transcript	Inf	77.5229	84	106.699	70.3979	51.301	46.5229	NA	19.5229	2.69897	NA	0.221849	NA
LmxM.26_999570	novel transcript	Inf	76.699	75.0969	77	52	40.5229	1.09691	16	21.0969	2.52288	3.1549	3.52288	3.39794
LmxM.26_1003225	novel transcript	Inf	44.301	NA	47.301	NA	NA	NA	NA	4.69897	NA	NA	NA	NA
LmxM.26_1019303	novel transcript	Inf	41.0458	61	46.301	3.52288	NA	NA	3.69897	NA	NA	NA	NA	NA
LmxM.27_15671	novel transcript	106.398	NA	23	28.301	NA	13.0458	NA	NA	NA	NA	NA	NA	NA
LmxM.27_48981	novel transcript	101.155	15	13.699	13.699	NA	NA	NA	NA	NA	1.4318	NA	NA	NA
LmxM.27_59819	novel transcript	Inf	52.699	76	75.3979	31.2218	17	16.301	6.04576	NA	2.39794	2.69897	2.69897	NA
LmxM.27_91487	novel transcript	Inf	NA	NA	NA	22.301	11.699	8	4.52288	3.22185	NA	2.69897	NA	NA
LmxM.27_124660	novel transcript	121.155	21	22.699	25.301	NA	7.1549	NA	NA	NA	NA	2.30103	NA	2.22185
LmxM.27_131104	novel transcript	148.523	13	19	19.699	9.69897	NA	NA	NA	NA	NA	NA	NA	NA
LmxM.27_157076	novel transcript	Inf	128	113.699	111	13.699	NA	NA	NA	NA	5.39794	2.52288	NA	NA
LmxM.27_186009	novel transcript	Inf	28.1549	40.699	40.699	18	5	4.39794	NA	NA	2.39794	5.52288	NA	NA
LmxM.27_248220	novel transcript	Inf	28	NA	53	6.52288	NA	NA	NA	NA	2.39794	NA	NA	1.09691
LmxM.27_250040	novel transcript	Inf	19.3979	NA	21.5229	6.1549	NA	NA	NA	2.69897	NA	2.30103	NA	NA
LmxM.27_286279	novel transcript	Inf	28.699	41.5229	41.5229	5.30103	NA	3.1549	NA	NA	NA	2.69897	NA	NA
LmxM.27_355733	novel transcript	Inf	50.5229	38.5229	39.5229	6.1549	3.69897	3.52288	NA	NA	1.92082	2.04576	NA	NA
LmxM.27_366238	novel transcript	Inf	45.0969	34.699	47	28.699	18.699	25	13	NA	NA	NA	NA	NA
LmxM.27_387744	novel transcript	178.699	88.1549	82.3979	86.699	63.699	47.2218	38.5229	NA	NA	NA	NA	3.69897	NA
LmxM.27_401149	novel transcript	Inf	34.699	NA	NA	11.1549	NA	NA	NA	NA	NA	NA	1.65758	NA
LmxM.27_481099	novel transcript	Inf	111.046	106.097	108	8.30103	19.5229	NA	4	NA	NA	4.1549	NA	NA
LmxM.27_539014	novel transcript	161.222	21.3979	19.0969	24.3979	14.0969	7.39794	8	1.42022	NA	1.79588	NA	NA	NA
LmxM.27_610394	novel transcript	179.699	NA	25	25.699	9.39794	NA	NA	NA	NA	NA	NA	NA	NA
LmxM.27_626028	novel transcript	148.699	37.0969	35	35	22.699	26.699	26.699	29.0458	22.1549	14	16	14.3979	23.2218
LmxM.27_628647	novel transcript	106.301	47	47.699	47.699	46	41.699	41.699	35.2218	41.699	32.3979	33.5229	33.699	30.3979
LmxM.27_632883	novel transcript	138.523	28.301	39.301	33	6.04576	4.1549	4.30103	NA	NA	NA	2.52288	NA	NA
LmxM.27_637995	novel transcript	Inf	61.301	64.5229	55	32.2218	NA	NA	NA	11	NA	NA	2.69897	NA
LmxM.27_640533	novel transcript	Inf	61.2218	64.5229	55	35	17.699	NA	NA	10.5229	NA	9.69897	NA	NA
LmxM.27_665368	novel transcript	Inf	45.5229	97.699	97.2218	19.301	5	5	3.52288	9.04576	NA	3.22185	2.39794	NA
LmxM.27_721901	novel transcript	176.398	NA	NA	NA	4.39794	10.301	9.22185	NA	NA	NA	4.39794	NA	NA
LmxM.27_729720	novel transcript	Inf	NA	NA	NA	8.39794	5.69897	NA	NA	NA	NA	NA	NA	NA
LmxM.27_772761	novel transcript	56.699	14.5229	17.5229	17.5229	1.74473	NA	NA	3.1549	NA	NA	NA	NA	1.50864
LmxM.27_806016	novel transcript	Inf	38.301	62.3979	65.5229	9.30103	9	8.52288	NA	NA	NA	1.85387	NA	NA
LmxM.27_812481	novel transcript	56.699	NA	8.39794	8.39794	NA	NA	NA	NA	NA	3.39794	1.92082	NA	NA
LmxM.27_850316	novel transcript	Inf	51.5229	52.699	52.699	41.2218	35.2218	35.699	27.0458	25.699	NA	3	NA	NA
LmxM.27_886553	novel transcript	94.699	30.301	32.0458	31.0969	7.69897	2.52288	1.45593	NA	NA	NA	1.40894	NA	NA
LmxM.27_895570	novel transcript	Inf	NA	NA	44.301	17	8.30103	10.0969	9.52288	NA	NA	NA	2.04576	NA
LmxM.27_903196	novel transcript	107.523	25.699	30.1549	30.699	7.04576	4.69897	NA	NA	1.50864	NA	NA	NA	NA
LmxM.27_934528	novel transcript	148.523	33.1549	64.699	64.699	37.301	42.301	43.5229	20	23.3979	12.2218	11.301	11.1549	6.04576
LmxM.27_952332	novel transcript	148.398	13.2218	19.2218	19.2218	9	NA	NA	NA	NA	NA	NA	NA	NA
LmxM.27_953053	novel transcript	63.301	26	27.3979	27.3979	8.69897	4.30103	4.52288	NA	1.60206	1.92082	NA	NA	NA
LmxM.27_1039091	novel transcript	Inf	32	29.0458	29.0458	10.699	8.69897	5.52288	3.30103	NA	NA	NA	NA	NA
LmxM.28_46618	novel transcript	Inf	43.0969	46	43	10.3979	3.69897	NA	NA	6	NA	NA	3	NA
LmxM.28_65129	novel transcript	Inf	40.0458	39.3979	39.3979	12.2218	16	16	8.04576	NA	NA	NA	NA	NA
LmxM.28_106038	novel transcript	127	13.301	10	9.09691	4.30103	NA	NA	NA	4	2.69897	2.04576	NA	NA
LmxM.28_113632	novel transcript	134.699	28.1549	28.5229	28.5229	6.69897	NA	3.52288	NA	NA	2.52288	3.69897	NA	NA
LmxM.28_188448	novel transcript	Inf	10.699	37.699	38.699	10.699	NA	NA	NA	NA	2.69897	3	NA	NA
LmxM.28_189493	novel transcript	Inf	73.0458	69.5229	71	47.699	42.3979	43	31.2218	NA	16	14.3979	21.5229	22.2218
LmxM.28_190985	novel transcript	Inf	49.699	63.1549	67.699	12	3.09691	NA	NA	NA	NA	NA	NA	NA
LmxM.28_347210	novel transcript	Inf	106.523	109	110.155	75.0969	57	56	36.5229	60.699	2.30103	NA	NA	NA
LmxM.28_353030	novel transcript	Inf	44.699	40.5229	38.5229	9	NA	NA	NA	NA	NA	2.22185	NA	NA
LmxM.28_396896	novel transcript	130.523	8.52288	16.2218	15	NA	NA	NA	NA	NA	2.69897	NA	4	0.958607
LmxM.28_488200	novel transcript	133.699	70	35.699	34.1549	3.30103	5.52288	5.52288	7.39794	11.2218	NA	2.22185	2.69897	NA
LmxM.28_512068	novel transcript	132	27.0458	24.3979	24.699	NA	NA	NA	NA	NA	2.52288	NA	NA	NA
LmxM.28_525558	novel transcript	Inf	56.699	46	45.3979	19.1549	NA	NA	NA	NA	3.30103	NA	NA	NA
LmxM.28_534000	novel transcript	Inf	36.1549	22.3979	23.699	9.69897	4	2.30103	1.22915	NA	NA	NA	2.69897	NA
LmxM.28_559864	novel transcript	90	15.5229	18.1549	19	2.69897	NA	NA	NA	NA	NA	3	NA	NA
LmxM.28_601219	novel transcript	154.699	56.1549	78	78	36.3979	33	34.3979	10.699	16.301	5	2.22185	2.04576	2.30103
LmxM.28_620071	novel transcript	88.3979	29.699	28.1549	29.2218	8.1549	NA	1.61979	NA	NA	1.79588	NA	NA	3.30103
LmxM.28_634321	novel transcript	34.301	8.1549	6.39794	6.39794	NA	NA	NA	NA	NA	NA	NA	3	NA
LmxM.28_711423	novel transcript	130.301	28.301	31.2218	31.2218	10	8.69897	8.52288	NA	NA	NA	NA	2.52288	2.22185
LmxM.28_731246	novel transcript	108	25.5229	30.5229	30	11.699	10.3979	NA	5.39794	5	NA	NA	NA	NA
LmxM.28_738754	novel transcript	Inf	178	Inf	Inf	165.097	NA	100.301	101.699	NA	NA	NA	NA	NA
LmxM.28_744600	novel transcript	Inf	39.1549	48.699	48.2218	13.3979	8.69897	NA	NA	NA	NA	NA	NA	NA
LmxM.28_754682	novel transcript	Inf	11.2218	9	9	2.30103	NA	NA	1.92082	NA	2.22185	NA	NA	NA
LmxM.28_755354	novel transcript	23.0458	13	11.1549	12	5.69897	NA	1.50864	NA	0.823909	0.552842	NA	NA	NA
LmxM.28_770156	novel transcript	145	NA	55.699	53.699	13.699	NA	NA	NA	NA	NA	NA	2.04576	NA
LmxM.28_772974	novel transcript	Inf	115.097	54.3979	91.5229	65.699	75.699	NA	36	36.3979	2.52288	2.69897	NA	2.52288
LmxM.28_775828	novel transcript	Inf	39.699	54.0458	52	22	NA	NA	NA	NA	NA	NA	NA	NA
LmxM.28_776588	novel transcript	Inf	43.5229	NA	NA	NA	NA	NA	NA	NA	NA	NA	NA	NA
LmxM.28_820852	novel transcript	Inf	68.5229	60.5229	68.0458	31.2218	NA	NA	13	NA	NA	NA	NA	3.22185
LmxM.28_863136	novel transcript	Inf	39.2218	NA	43.5229	NA	NA	NA	NA	NA	2.52288	NA	NA	NA
LmxM.28_920015	novel transcript	122.097	NA	NA	27.2218	9.69897	NA	NA	NA	NA	NA	NA	NA	NA
LmxM.28_933794	novel transcript	91.699	19.301	22.699	25	7.52288	NA	NA	NA	NA	2.69897	NA	NA	NA
LmxM.28_1097285	novel transcript	141.523	52.0458	70.5229	72.699	33.301	25.5229	24.699	23.5229	NA	NA	NA	NA	2.22185
LmxM.28_1133990	novel transcript	Inf	165.699	NA	NA	127.155	137	135	108.699	101.523	NA	2.30103	NA	NA
LmxM.29_2248	novel transcript	Inf	65	60.699	60.3979	37.3979	40.0458	43	NA	37	NA	4.52288	NA	NA
LmxM.29_20039	novel transcript	136.523	44.301	48.5229	50.0969	9.69897	9.39794	12.0969	NA	NA	NA	4.30103	3	NA
LmxM.29_25331	novel transcript	158.398	34	16	16	NA	NA	NA	NA	NA	3	2.22185	NA	NA
LmxM.29_26282	novel transcript	158	103.301	69	70.1549	67.0969	67	67	15.1549	58.1549	NA	NA	NA	6
LmxM.29_50693	novel transcript	Inf	39.699	53.2218	55	13.5229	10.699	10.699	26.1549	NA	NA	3	NA	10.0458
LmxM.29_61148	novel transcript	154.301	108	83.699	82.3979	55.5229	27	26.0458	11.0458	19.699	NA	NA	2.30103	NA
LmxM.29_124490	novel transcript	Inf	55.2218	74.699	70	6.52288	3	3	19	4	2.69897	NA	NA	NA
LmxM.29_142315	novel transcript	Inf	31	33.301	30.1549	15.0458	21.301	23.1549	8.69897	18	4.1549	3	3	1.92082
LmxM.29_210029	novel transcript	Inf	Inf	Inf	Inf	141.222	105.155	106.301	53.5229	83.0969	NA	NA	NA	36.3979
LmxM.29_222452	novel transcript	Inf	123.155	124.523	127.699	84.5229	44.699	43.699	17.699	36.5229	NA	1.50864	NA	1.09691
LmxM.29_361479	novel transcript	122.398	21	23.3979	23.3979	NA	NA	NA	NA	NA	NA	NA	NA	NA
LmxM.29_369870	novel transcript	Inf	71.699	76.699	76.699	15.1549	29.0458	30	2.22185	8.39794	NA	NA	2.69897	NA
LmxM.29_472347	novel transcript	Inf	18.1549	20.699	20.699	7.1549	NA	6.30103	NA	NA	NA	NA	NA	NA
LmxM.29_481116	novel transcript	Inf	51.0458	66.699	66.0969	18.301	NA	34.5229	NA	NA	NA	NA	NA	NA
LmxM.29_497000	novel transcript	Inf	18.699	17.699	22.0458	NA	NA	NA	NA	NA	1.79588	1.92082	1.30103	NA
LmxM.29_504821	novel transcript	35.699	9.30103	6.69897	NA	NA	NA	NA	NA	NA	3	2.04576	NA	1.09691
LmxM.29_505304	novel transcript	156.046	NA	NA	NA	NA	NA	NA	NA	NA	1.92082	1.79588	NA	NA
LmxM.29_534955	novel transcript	Inf	55	52.5229	52.5229	25.301	26.3979	26.699	NA	5.52288	3.09691	2.52288	3.69897	2.69897
LmxM.29_563385	novel transcript	Inf	NA	NA	NA	16.699	NA	NA	NA	NA	3	2.39794	4	NA
LmxM.29_568311	novel transcript	Inf	23	21.0458	21.699	7.52288	5.22185	5.52288	2.69897	NA	NA	3.1549	NA	NA
LmxM.29_592942	novel transcript	179.398	33.699	25.2218	26	14.5229	NA	NA	3.52288	NA	NA	NA	NA	NA
LmxM.29_709389	novel transcript	150	29	22.301	22.301	NA	NA	NA	5	NA	NA	NA	NA	3
LmxM.29_718773	novel transcript	Inf	NA	69.699	70.5229	8	5.52288	5.69897	2.69897	NA	2.22185	3	1.37675	NA
LmxM.29_734108	novel transcript	Inf	120.699	109.301	109.301	78	47.2218	46.699	12	30.301	NA	NA	7	NA
LmxM.29_776102	novel transcript	Inf	18.699	24	24	NA	NA	3.30103	2.09691	4.69897	NA	NA	NA	NA
LmxM.29_928898	novel transcript	Inf	36.0458	37.699	38.301	8	7.69897	7.39794	7	NA	3.1549	NA	3	NA
LmxM.29_980470	novel transcript	Inf	56.5229	58.0969	57.3979	4.69897	NA	NA	NA	NA	NA	NA	3.09691	NA
LmxM.29_1030666	novel transcript	Inf	48	52.1549	51.1549	NA	7.1549	5.30103	16.699	2.69897	7.1549	5.69897	9.30103	NA
LmxM.29_1105117	novel transcript	111.699	61	31	33	15.2218	14.301	NA	NA	NA	3.09691	NA	NA	NA
LmxM.29_1109323	novel transcript	176.097	22.5229	26.699	26.301	8.52288	NA	NA	NA	3.30103	2.69897	NA	2.04576	NA
LmxM.29_1140415	novel transcript	150.398	NA	NA	NA	19.5229	NA	11.5229	NA	9	2.30103	NA	1.09691	NA
LmxM.29_1178010	novel transcript	Inf	55.0458	59	59.301	20.1549	14.0458	12.3979	26.3979	2.22185	7.1549	NA	NA	NA
LmxM.29_1219020	novel transcript	Inf	57.2218	123.699	118.398	14.3979	54.699	52.3979	15	30.699	NA	3	NA	NA
LmxM.29_1221308	novel transcript	Inf	40.699	23	35	11.0969	6.1549	1.65758	NA	NA	NA	NA	NA	NA
LmxM.29_1250924	novel transcript	Inf	81.2218	56.5229	88	20.3979	10.5229	12.5229	NA	NA	3	3.52288	NA	NA
LmxM.29_1264929	novel transcript	Inf	NA	NA	NA	NA	NA	NA	NA	NA	NA	NA	NA	NA
LmxM.29_1282952	novel transcript	Inf	60.5229	NA	NA	NA	NA	NA	NA	NA	NA	NA	NA	3.39794
LmxM.29_1311888	novel transcript	155.699	49	53	51.0969	35.0458	16.3979	16.2218	4	24.301	2.04576	2.69897	1.61979	NA
LmxM.30_26957	novel transcript	93	47.2218	64.2218	65.699	49.301	26.699	32.699	31.1549	35	17.2218	16.5229	18.699	NA
LmxM.30_42693	novel transcript	Inf	33.301	85	85	13	29.0969	29.0969	20	NA	NA	3	NA	2.39794
LmxM.30_51845	novel transcript	Inf	93.699	114.699	114.699	82.5229	82	80.301	7.52288	52	3	NA	4	4.52288
LmxM.30_99561	novel transcript	Inf	40.5229	56.2218	28.301	7.30103	NA	NA	5.09691	NA	NA	NA	2.30103	NA
LmxM.30_141873	novel transcript	Inf	NA	NA	NA	NA	NA	NA	NA	1.09691	NA	NA	4	NA
LmxM.30_146634	novel transcript	Inf	NA	NA	NA	NA	NA	NA	NA	NA	NA	NA	NA	NA
LmxM.30_150064	novel transcript	Inf	NA	NA	NA	NA	NA	NA	NA	NA	NA	NA	NA	NA
LmxM.30_156046	novel transcript	Inf	NA	NA	NA	NA	6.04576	NA	NA	NA	NA	NA	NA	NA
LmxM.30_164548	novel transcript	126.699	19.5229	19.3979	19.301	NA	NA	NA	NA	2.69897	NA	NA	NA	2.22185
LmxM.30_167681	novel transcript	Inf	NA	NA	NA	NA	15.301	NA	10.0969	NA	2.39794	2.69897	2.52288	3
LmxM.30_168821	novel transcript	133	NA	NA	NA	NA	NA	NA	NA	NA	NA	NA	NA	28.301
LmxM.30_171264	novel transcript	Inf	NA	149.398	NA	122.699	NA	NA	36	NA	3.69897	3.39794	NA	NA
LmxM.30_173393	novel transcript	108.699	30.0969	29.301	30.1549	12.5229	6.09691	6.39794	NA	NA	NA	3.1549	NA	NA
LmxM.30_175811	novel transcript	Inf	86.2218	85.0458	80.3979	52.5229	66.0458	64.3979	42	65.3979	NA	NA	NA	NA
LmxM.30_176816	novel transcript	Inf	NA	NA	NA	NA	142	142.301	29	95.699	NA	17.301	NA	NA
LmxM.30_179091	novel transcript	Inf	36.699	NA	NA	NA	NA	NA	10.0969	NA	2.39794	1.88606	2.52288	NA
LmxM.30_184801	novel transcript	109	30.0969	29.301	30.1549	12.5229	6.09691	6.39794	NA	NA	NA	3.1549	NA	NA
LmxM.30_215742	novel transcript	95.0458	13.699	19.699	19.699	19	4	NA	3	NA	1.37675	NA	1.65758	1.50864
LmxM.30_254565	novel transcript	104.301	30.2218	32.699	32.699	9	NA	NA	NA	NA	NA	3.39794	NA	1.92082
LmxM.30_269107	novel transcript	Inf	24.5229	25.2218	25.301	1.07058	NA	1.88606	12.301	NA	1.22915	4.1549	NA	NA
LmxM.30_274092	novel transcript	Inf	40.5229	31.699	35.699	9.69897	NA	NA	NA	NA	NA	2.52288	NA	NA
LmxM.30_275844	novel transcript	161.699	22.301	24.0969	25	11.0969	6.69897	6.04576	NA	2.69897	NA	NA	3.09691	NA
LmxM.30_286252	novel transcript	Inf	42.0969	36	36	10.1549	NA	6	NA	NA	2.69897	NA	NA	NA
LmxM.30_301222	novel transcript	Inf	49.301	37.301	36.699	20	8.69897	8	NA	NA	NA	NA	NA	NA
LmxM.30_320249	novel transcript	Inf	45	38	36.699	5.69897	NA	4.30103	NA	NA	1.92082	NA	NA	NA
LmxM.30_321341	novel transcript	Inf	27	27.699	45.0969	NA	9.22185	19	NA	NA	1.79588	NA	NA	NA
LmxM.30_322256	novel transcript	165.523	8.09691	8.1549	7.30103	NA	NA	9.52288	NA	NA	NA	NA	NA	NA
LmxM.30_323103	novel transcript	114.523	34.5229	41	41	7.39794	8.1549	8.1549	NA	2.69897	NA	3	2.22185	4.52288
LmxM.30_334370	novel transcript	Inf	39	71.5229	72	15.699	NA	12.5229	NA	NA	NA	3.39794	NA	NA
LmxM.30_356721	novel transcript	Inf	52.3979	87.699	NA	4.1549	4	2.52288	NA	NA	NA	NA	NA	NA
LmxM.30_358240	novel transcript	Inf	65	53.301	53.699	36.1549	32	41.699	25.301	37.301	14.699	15.0458	19.0969	NA
LmxM.30_406468	novel transcript	Inf	22.2218	21.301	19.699	14.3979	4	2.22185	0.823909	-0.278754	-0.832509	NA	NA	NA
LmxM.30_421043	novel transcript	121.398	24.699	20.699	21.3979	NA	1.88606	0.387216	NA	4.1549	NA	2.04576	NA	NA
LmxM.30_435852	novel transcript	152.398	30.699	20.0458	28.5229	9.39794	NA	3.1549	4.52288	NA	2.69897	NA	3.1549	NA
LmxM.30_487529	novel transcript	92	31.3979	38	35.0969	12	36.301	17.2218	14.5229	13.699	NA	13.0969	14	12.301
LmxM.30_516500	novel transcript	96	21	NA	NA	17.5229	NA	NA	NA	NA	3	NA	NA	NA
LmxM.30_606476	novel transcript	Inf	32.699	51.699	53.2218	8.39794	11	13.0458	NA	NA	NA	2.69897	NA	NA
LmxM.30_663518	novel transcript	160.155	19.301	34.0969	35.5229	NA	2.1549	NA	NA	3.52288	NA	NA	NA	NA
LmxM.30_701727	novel transcript	38.5229	7	9.69897	9	NA	NA	NA	NA	2.04576	NA	NA	NA	0.537602
LmxM.30_755730	novel transcript	120.699	30	NA	NA	NA	NA	NA	3	2.09691	NA	NA	2.69897	NA
LmxM.30_800391	novel transcript	112.699	12.5229	13	12	4.04576	3.39794	2.69897	NA	NA	NA	NA	3.30103	NA
LmxM.30_804815	novel transcript	Inf	48.2218	51.699	55	NA	15.5229	16.0969	4.39794	NA	NA	NA	NA	NA
LmxM.30_820354	novel transcript	Inf	28.3979	34.301	34.699	13.0969	NA	NA	NA	5.69897	2.52288	NA	NA	NA
LmxM.30_822114	novel transcript	159.222	16.5229	25	26	NA	NA	NA	NA	1.92082	NA	2.69897	1.23657	NA
LmxM.30_833644	novel transcript	Inf	34.0458	33.699	33.699	5	NA	9.30103	NA	NA	NA	NA	NA	NA
LmxM.30_838002	novel transcript	Inf	30.5229	NA	NA	13.301	NA	9.30103	NA	4.69897	NA	2.52288	NA	NA
LmxM.30_842933	novel transcript	Inf	35	49.5229	49.5229	19.699	9.1549	8.52288	NA	NA	3.30103	3	NA	NA
LmxM.30_850766	novel transcript	150	10.5229	8	8	4.22185	NA	NA	NA	NA	NA	NA	NA	NA
LmxM.30_852067	novel transcript	Inf	60.699	59.5229	62.301	11.1549	NA	NA	NA	7	NA	2.52288	NA	NA
LmxM.30_862390	novel transcript	Inf	42.0458	27	28.3979	NA	NA	NA	NA	NA	4.52288	NA	NA	1.58503
LmxM.30_864653	novel transcript	Inf	26.5229	29.301	27	7.69897	2.30103	3.39794	NA	NA	NA	3	NA	NA
LmxM.30_866157	novel transcript	177.699	49.5229	60.699	60.699	15.5229	17.5229	18.2218	NA	1.92082	NA	NA	NA	NA
LmxM.30_868130	novel transcript	Inf	119.699	131	131.398	38.1549	31.0458	30	NA	10.2218	2.69897	4	2.30103	NA
LmxM.30_873749	novel transcript	Inf	35.2218	46	91.699	52.699	13	13.0969	NA	17.699	NA	NA	NA	NA
LmxM.30_876017	novel transcript	Inf	15.699	35	35	9	6.39794	6.04576	1.58503	3	NA	NA	3	NA
LmxM.30_881575	novel transcript	Inf	46.699	50.5229	46.301	12.5229	6	7.04576	NA	NA	3	NA	2.04576	NA
LmxM.30_883670	novel transcript	Inf	40	42.5229	70.699	22.2218	22.0969	21.5229	NA	4	NA	NA	3.52288	NA
LmxM.30_885630	novel transcript	Inf	56	54.2218	56.301	NA	7.69897	8.39794	NA	NA	0.267606	NA	NA	NA
LmxM.30_915925	novel transcript	Inf	42.1549	35.5229	35.5229	14.1549	NA	NA	4.30103	NA	2.69897	2.69897	NA	NA
LmxM.30_939849	novel transcript	Inf	29.5229	37.301	37.3979	3.69897	5	5.30103	7.30103	NA	2.39794	NA	2.69897	NA
LmxM.30_942384	novel transcript	Inf	20.699	31	31	NA	NA	NA	NA	NA	2.39794	3	NA	NA
LmxM.30_952239	novel transcript	Inf	92.2218	74.5229	76.699	26.2218	NA	NA	NA	NA	NA	NA	NA	NA
LmxM.30_971741	novel transcript	Inf	24.0458	41.0458	41.0458	5.22185	2.30103	NA	NA	NA	2.09691	NA	NA	NA
LmxM.30_984224	novel transcript	120.699	NA	NA	NA	NA	18.699	8.52288	NA	NA	NA	NA	NA	NA
LmxM.30_996959	novel transcript	153.046	22.5229	33.2218	23.5229	13.0458	4	3.69897	NA	5.09691	NA	NA	NA	NA
LmxM.30_998081	novel transcript	Inf	46.3979	40	38.699	9.09691	9.22185	7.69897	NA	2.69897	NA	0.677781	NA	NA
LmxM.30_1057740	novel transcript	Inf	45.3979	41.5229	67.0458	5.69897	9.04576	7	NA	NA	NA	NA	NA	NA
LmxM.30_1101626	novel transcript	165.699	48.699	49	49.301	9.69897	NA	NA	10.301	NA	3	NA	NA	NA
LmxM.30_1117417	novel transcript	133	14.3979	16	16.0969	NA	NA	NA	2.22185	NA	NA	2.69897	NA	NA
LmxM.30_1121959	novel transcript	Inf	63.699	54	54.5229	11	16.699	16.699	NA	NA	3	NA	NA	NA
LmxM.30_1124019	novel transcript	Inf	101.699	112.301	112.699	70.0969	38.699	38.699	4.39794	NA	NA	2.69897	2.30103	NA
LmxM.30_1125732	novel transcript	Inf	38.0969	35.699	39.1549	20.301	15.301	14.3979	12	NA	2.39794	NA	3.1549	NA
LmxM.30_1172984	novel transcript	Inf	63.5229	68	68.5229	4.1549	5.69897	5.69897	NA	NA	0.823909	NA	NA	NA
LmxM.30_1215547	novel transcript	Inf	20.1549	17.3979	18	7.39794	NA	NA	NA	NA	4.69897	2.22185	NA	NA
LmxM.30_1242965	novel transcript	76.1549	19.1549	19.699	19.3979	5	6.52288	NA	NA	NA	2.22185	3.30103	NA	NA
LmxM.30_1249239	novel transcript	Inf	51.3979	47.301	48.5229	12	NA	NA	NA	4.1549	NA	2.69897	NA	4.30103
LmxM.30_1272953	novel transcript	101.699	50.1549	49.3979	49.699	31.2218	5	5	NA	NA	3.39794	3	4	NA
LmxM.30_1292177	novel transcript	Inf	38	19.5229	19.5229	5.52288	1.92082	1.92082	NA	NA	NA	2.69897	NA	NA
LmxM.30_1297889	novel transcript	123.046	75.2218	91	91	54	29	29.699	4.30103	9	1.56864	NA	3.39794	NA
LmxM.30_1390425	novel transcript	Inf	36	37.699	37.699	13.5229	11.3979	11.3979	25.1549	NA	NA	NA	1.38722	NA
LmxM.30_1394210	novel transcript	92	20.1549	21.3979	21.3979	21.2218	4.52288	5	1.92082	NA	NA	2.22185	NA	NA
LmxM.30_1399774	novel transcript	Inf	83.301	109.523	109.523	NA	NA	24	NA	NA	NA	NA	9.69897	13
LmxM.31_12862	novel transcript	Inf	NA	NA	24.301	NA	7.04576	7.04576	5	NA	1.56864	3.30103	3.69897	1.50864
LmxM.31_16851	novel transcript	171.155	23.699	12.699	13	6.39794	9	8.69897	NA	NA	NA	2.69897	NA	NA
LmxM.31_25742	novel transcript	Inf	NA	36	37	9.69897	NA	3	NA	2.52288	1.50864	NA	2.69897	NA
LmxM.31_28754	novel transcript	Inf	35.301	30.699	32	11.1549	10.301	9.04576	12.2218	1.50864	NA	2.30103	NA	NA
LmxM.31_142940	novel transcript	Inf	27.301	43.1549	55.1549	14.2218	13	9.69897	6.69897	NA	NA	NA	NA	NA
LmxM.31_169302	novel transcript	Inf	27	19.3979	19.3979	12.301	9.22185	10.699	NA	NA	NA	NA	NA	2.30103
LmxM.31_216511	novel transcript	151	32.699	20.0969	19.699	6	NA	NA	NA	NA	NA	NA	NA	NA
LmxM.31_226761	novel transcript	Inf	17.699	NA	NA	8.39794	NA	NA	NA	NA	NA	NA	NA	NA
LmxM.31_235972	novel transcript	Inf	95.2218	99.1549	99.1549	45.1549	52.0458	51.301	22.2218	38.5229	NA	NA	NA	9.69897
LmxM.31_309625	novel transcript	Inf	52.3979	42.699	50.0969	19.5229	24	23.2218	NA	NA	NA	NA	NA	NA
LmxM.31_320435	novel transcript	Inf	39.3979	78.3979	76.699	10.699	7.52288	8.30103	13.2218	NA	1.60206	2.69897	3	NA
LmxM.31_340171	novel transcript	Inf	70.699	92.3979	93.301	65	63.0969	62.3979	33.699	52.3979	NA	NA	NA	12.3979
LmxM.31_345053	novel transcript	146.398	32.3979	38	37.2218	10	8.39794	NA	NA	NA	NA	NA	1.92082	1.65758
LmxM.31_397243	novel transcript	Inf	NA	NA	NA	5.52288	NA	NA	NA	2.69897	1.56864	NA	NA	3
LmxM.31_483558	novel transcript	Inf	53.699	NA	NA	15.5229	4.52288	6.30103	NA	NA	NA	NA	NA	NA
LmxM.31_492479	novel transcript	103.523	60.699	74.699	74.699	44	34	32.3979	14.1549	28.3979	11.699	6.30103	7.39794	NA
LmxM.31_574042	novel transcript	Inf	46.301	47.2218	47.2218	9.69897	14.699	14.699	NA	NA	2.52288	2.69897	3.39794	3
LmxM.31_598090	novel transcript	Inf	26.5229	29.0458	28.0969	9.39794	8.30103	5	NA	NA	2.52288	NA	NA	3.30103
LmxM.31_654106	novel transcript	81.3979	14.3979	15.1549	15.5229	4.69897	NA	NA	NA	2.22185	NA	3	NA	NA
LmxM.31_662137	novel transcript	143.699	21.699	20.2218	23	NA	NA	NA	NA	3.69897	NA	2.52288	NA	1.69897
LmxM.31_745950	novel transcript	Inf	29.5229	NA	NA	13	NA	NA	NA	NA	NA	NA	NA	NA
LmxM.31_767642	novel transcript	Inf	46.3979	55.3979	60.0458	22.5229	13.699	13.699	2.69897	NA	NA	4.22185	NA	4.69897
LmxM.31_833519	novel transcript	161.523	89.301	90.699	83.5229	47.5229	57.301	55.699	14.0969	49	3.39794	4.1549	4.1549	1.50864
LmxM.31_841362	novel transcript	Inf	NA	NA	NA	13.699	7.30103	8.30103	8.09691	NA	NA	NA	NA	NA
LmxM.31_862143	novel transcript	109.699	31.2218	33	34	NA	NA	3.1549	NA	NA	2.69897	NA	NA	NA
LmxM.31_881475	novel transcript	Inf	30.699	31.5229	22.699	11.5229	19.5229	20	NA	-0.30103	NA	NA	NA	NA
LmxM.31_961883	novel transcript	Inf	70.2218	70.0969	71	40.5229	23.5229	24.0458	10.5229	21	NA	5.39794	6	6.04576
LmxM.31_974729	novel transcript	Inf	140.222	149.046	180	111	99.699	94.301	25	19	NA	NA	NA	NA
LmxM.31_1028437	novel transcript	Inf	25	43	43.3979	25.5229	18.699	20.301	NA	NA	NA	4.1549	1.92082	NA
LmxM.31_1047031	novel transcript	Inf	19.699	21.2218	22	11.301	10.5229	9.69897	NA	8.69897	NA	2.30103	NA	0.79588
LmxM.31_1077204	novel transcript	Inf	42	50.699	50.2218	13	8	8	23.5229	22.699	2.30103	2.30103	NA	1.58503
LmxM.31_1131940	novel transcript	63.5229	19.3979	19.0969	19.699	8.39794	4	4.30103	NA	NA	NA	NA	NA	NA
LmxM.31_1168386	novel transcript	137.046	121.398	79	78.2218	37.699	61.5229	62.0969	39.699	77.3979	2.22185	NA	2.22185	3.1549
LmxM.31_1169024	novel transcript	57.699	78	76	77	62.0969	52.5229	52.301	42.2218	45.5229	25	25	32.699	NA
LmxM.31_1Inf139	novel transcript	108.097	25.5229	72.699	72.699	22.2218	18.301	18.5229	NA	8	NA	NA	NA	NA
LmxM.31_1221500	novel transcript	Inf	23.3979	NA	NA	23.0969	12.301	12.699	NA	NA	3.30103	NA	NA	NA
LmxM.31_1224287	novel transcript	Inf	33.5229	37.2218	38.1549	10.699	10.0969	NA	NA	NA	NA	2.39794	NA	NA
LmxM.31_1249760	novel transcript	76.5229	20.3979	18.699	21	NA	NA	NA	2.39794	NA	2.04576	NA	2.69897	NA
LmxM.31_1349505	novel transcript	Inf.154901959986	25.1549	39.699	43.699	10.2218	7.69897	7.69897	NA	NA	3	2.39794	NA	NA
LmxM.31_1377213	novel transcript	Inf	54.301	60.5229	64.3979	38	17.3979	17.3979	13.0969	14.699	8.39794	NA	10	7.1549
LmxM.31_1391041	novel transcript	Inf	34.5229	53.3979	55.2218	31.699	26.699	26.699	20.301	21.0969	7.04576	6.39794	5.09691	NA
LmxM.31_1421201	novel transcript	Inf	45	109	104.155	17.5229	NA	14.5229	NA	NA	4	5.69897	1.09691	NA
LmxM.31_1465281	novel transcript	158.097	18.3979	22.301	23.5229	7.69897	9	9.69897	NA	2.09691	1.92082	NA	NA	NA
LmxM.31_1486601	novel transcript	Inf	41.5229	44.5229	48.3979	24.699	18.5229	13.699	6.30103	19	NA	NA	NA	NA
LmxM.31_1488608	novel transcript	122.097	23	24.699	24.699	7.69897	NA	NA	NA	1.92082	NA	NA	NA	NA
LmxM.31_1516648	novel transcript	Inf	49.699	80.2218	80.699	3.69897	5.52288	NA	15.5229	NA	NA	NA	NA	NA
LmxM.31_1519800	novel transcript	Inf	69	Inf	Inf	NA	14.5229	NA	98.699	NA	41.3979	43.0969	38	NA
LmxM.32_1092	novel transcript	179	102.301	107.699	107.699	64	57.3979	59	17.1549	54	NA	2.69897	NA	NA
LmxM.32_67103	novel transcript	Inf	27.699	34	34	9.09691	NA	13.0969	NA	NA	NA	NA	NA	NA
LmxM.32_90879	novel transcript	Inf	85.2218	107	117.523	NA	21.5229	21.5229	13	21.699	3	3.69897	NA	NA
LmxM.32_93008	novel transcript	Inf	20.699	37.0458	38	8.22185	NA	NA	NA	NA	NA	NA	NA	NA
LmxM.32_98857	novel transcript	Inf	61.3979	61.301	71.699	17	17.699	24	13	22.5229	2.69897	2.1549	3.1549	NA
LmxM.32_135262	novel transcript	Inf	154	169	159.398	109.301	NA	76	29.301	NA	NA	3.39794	3.09691	NA
LmxM.32_137131	novel transcript	Inf	111.699	123.301	121.699	86.0969	13.699	61.2218	29.301	NA	3	NA	NA	4
LmxM.32_175309	novel transcript	133.097	45.1549	30.2218	33	19.699	14.699	15	NA	3.39794	1.79588	2	NA	NA
LmxM.32_256840	novel transcript	Inf	73.301	50	50	24	11	12.5229	22.5229	NA	NA	2	3	NA
LmxM.32_283937	novel transcript	69	24.1549	43.3979	45.0969	NA	3.69897	3	NA	NA	3	2.22185	NA	NA
LmxM.32_370151	novel transcript	Inf	35.5229	51.5229	53.3979	9	8.52288	NA	6.04576	NA	NA	NA	NA	NA
LmxM.32_412876	novel transcript	147.699	NA	50.3979	51.2218	NA	NA	NA	NA	NA	1.50864	2.30103	NA	NA
LmxM.32_474820	novel transcript	Inf	66.3979	80.699	83.699	60	44	44	30	57.0969	13	10.2218	12.1549	10.301
LmxM.32_492630	novel transcript	Inf	105.699	130.699	130.222	37.5229	7	6	17.2218	30.699	NA	0	NA	NA
LmxM.32_497744	novel transcript	Inf	80.1549	85.0969	83.699	50.3979	57.0969	55.3979	16	32.699	3.30103	NA	4.1549	NA
LmxM.32_523515	novel transcript	Inf	52.699	42.0969	50	10.1549	9	NA	NA	NA	NA	NA	NA	NA
LmxM.32_543882	novel transcript	178.699	43.699	49.699	54.0458	NA	NA	6.1549	NA	NA	NA	NA	NA	NA
LmxM.32_575618	novel transcript	Inf	29.699	15.0969	14.3979	14.699	5.22185	5.22185	4	4.69897	3	NA	4	3.1549
LmxM.32_609283	novel transcript	Inf	66.2218	28.3979	28.3979	NA	NA	NA	NA	NA	NA	NA	2.30103	NA
LmxM.32_614201	novel transcript	161	NA	7.69897	7.69897	12.3979	7.04576	9.22185	NA	3.30103	NA	3.30103	2.04576	NA
LmxM.32_616964	novel transcript	150.097	14	25	25	4.30103	2.69897	NA	NA	NA	NA	2.22185	NA	NA
LmxM.32_655399	novel transcript	Inf	105.398	107.523	108.523	80.3979	68	67.301	38	54.3979	NA	5.30103	6.69897	31.1549
LmxM.32_699809	novel transcript	Inf	42	NA	54	NA	NA	NA	NA	NA	3	2.52288	NA	NA
LmxM.32_705215	novel transcript	Inf	71	75.3979	76.1549	53.2218	50.3979	49.699	34.699	36.301	8.30103	9.22185	12.301	11.3979
LmxM.32_731965	novel transcript	117	53.2218	51.2218	52.3979	50	41.699	41.301	17.699	13.3979	2.69897	NA	NA	NA
LmxM.32_758818	novel transcript	121	24.1549	19.3979	17.2218	3.69897	NA	NA	NA	NA	NA	NA	NA	NA
LmxM.32_771483	novel transcript	Inf	NA	26.3979	43.3979	15	6.22185	8.30103	NA	NA	2.30103	2.09691	4	2.39794
LmxM.32_780269	novel transcript	Inf	NA	NA	NA	15.699	NA	NA	NA	NA	NA	NA	NA	NA
LmxM.32_787928	novel transcript	154.699	63.5229	62.3979	62.3979	35.5229	43.2218	43.2218	20.699	30	9.39794	10.699	8.39794	4.52288
LmxM.32_844211	novel transcript	Inf	33.0458	30.3979	31.1549	5.22185	5.22185	3.69897	3	NA	NA	1.56864	NA	2.52288
LmxM.32_853323	novel transcript	Inf	NA	52.2218	56.699	10.301	11.699	8	NA	2.22185	NA	NA	NA	3
LmxM.32_947772	novel transcript	Inf	43.699	75.1549	74.699	29.1549	47.3979	48.3979	10.699	19	NA	NA	NA	NA
LmxM.32_994517	novel transcript	Inf	29.0969	25	25.699	NA	NA	NA	NA	NA	NA	NA	NA	NA
LmxM.32_1018872	novel transcript	Inf	78.301	55.5229	55	10	NA	2.04576	NA	NA	3.52288	2.69897	NA	NA
LmxM.32_1099006	novel transcript	Inf	75.301	76	109.699	51	40.301	46.301	26.301	33.0458	NA	3.69897	NA	0.537602
LmxM.32_1159350	novel transcript	Inf	23.5229	32.699	22.1549	NA	NA	8	NA	NA	NA	NA	NA	NA
LmxM.32_1160176	novel transcript	Inf	60.3979	60.699	65.5229	18.699	16	12	NA	3.69897	NA	2.22185	NA	NA
LmxM.32_1174324	novel transcript	Inf	56.5229	59.5229	60.1549	12.0458	9.52288	10	NA	NA	1.10237	NA	NA	NA
LmxM.32_1178325	novel transcript	Inf	51.699	47	57.699	19.3979	6.52288	8.04576	NA	8	NA	NA	NA	NA
LmxM.32_1182738	novel transcript	Inf	62.3979	53	53.301	31.5229	17.2218	NA	NA	NA	NA	3	4.1549	NA
LmxM.32_1184452	novel transcript	Inf	58.699	60.5229	62.5229	23.699	8.69897	8.52288	NA	NA	NA	2.69897	3.39794	NA
LmxM.32_1186260	novel transcript	Inf	35	NA	NA	NA	15.2218	NA	3.09691	NA	NA	NA	NA	NA
LmxM.32_1188290	novel transcript	Inf	63.0458	52.1549	50.699	NA	NA	2.69897	NA	NA	NA	3	NA	NA
LmxM.32_1191766	novel transcript	Inf	64.2218	72.5229	72.699	19.699	NA	NA	0.823909	NA	NA	2.22185	4	NA
LmxM.32_1218334	novel transcript	143.699	20.1549	23.5229	23.5229	NA	NA	NA	NA	NA	0.229148	NA	NA	-0.146128
LmxM.32_1290979	novel transcript	Inf	63.2218	49.0969	63.3979	11	NA	NA	NA	NA	NA	2.69897	NA	NA
LmxM.32_1318429	novel transcript	142.222	43	34.5229	34.1549	4.39794	NA	NA	NA	NA	3.30103	4.1549	NA	2.04576
LmxM.32_1385679	novel transcript	Inf	69.301	59	59.301	19.699	15.0458	32.5229	7.52288	NA	2.52288	2.30103	NA	NA
LmxM.32_1391485	novel transcript	Inf	81.699	106.222	106.222	82.699	73	72.0458	9.30103	47.699	5.69897	NA	NA	4.39794
LmxM.32_1392423	novel transcript	150.523	47.5229	39.5229	48	NA	9.09691	9.09691	4.69897	NA	3.1549	2.30103	NA	1.13077
LmxM.33_14927	novel transcript	Inf	171.301	177.046	177	98	102.523	102.222	15.3979	20.699	2.52288	NA	NA	-0.146128
LmxM.33_26595	novel transcript	96.5229	25	31.5229	30	4.52288	2.52288	2.52288	NA	NA	NA	2.69897	NA	NA
LmxM.33_53409	novel transcript	Inf	30.5229	49	49	9.09691	9.52288	7	NA	NA	NA	NA	2.52288	NA
LmxM.33_88533	novel transcript	92.699	8.52288	12.0969	12.0969	NA	NA	NA	NA	NA	1.23657	NA	NA	1.92082
LmxM.33_114639	novel transcript	168.398	48.5229	NA	51.1549	17.699	NA	11.5229	NA	NA	NA	2.30103	NA	NA
LmxM.33_166918	novel transcript	Inf	22.699	42.699	39.699	15	3.69897	NA	8.22185	NA	1.79588	2.52288	1.52288	NA
LmxM.33_184244	novel transcript	Inf	26.5229	35.5229	35.699	20.1549	6.22185	7.1549	12.1549	NA	NA	4	NA	NA
LmxM.33_189011	novel transcript	Inf	47.1549	NA	NA	NA	9	NA	9.30103	NA	NA	NA	NA	NA
LmxM.33_196049	novel transcript	Inf	39.3979	49.5229	39	16.3979	16.3979	19	NA	NA	NA	NA	4	NA
LmxM.33_212199	novel transcript	Inf	30.301	52.5229	50.301	6.22185	8.30103	NA	NA	NA	NA	NA	NA	2.69897
LmxM.33_222987	novel transcript	Inf	27.301	19.5229	26.5229	13.699	5.69897	8	NA	NA	3.30103	4.1549	NA	NA
LmxM.33_249074	novel transcript	Inf	NA	NA	NA	6.69897	NA	NA	NA	NA	NA	NA	NA	NA
LmxM.33_320663	novel transcript	86.5229	NA	NA	26	NA	NA	NA	NA	NA	2.69897	3.52288	5.09691	3.30103
LmxM.33_354124	novel transcript	Inf	34.699	53.699	82	24.2218	29.2218	NA	11.699	NA	NA	3	NA	NA
LmxM.33_372298	novel transcript	178.155	60.5229	61.301	55.5229	14.0458	NA	NA	NA	3	NA	NA	NA	NA
LmxM.33_393782	novel transcript	135.097	30.3979	11.5229	13.5229	2.69897	NA	NA	NA	NA	NA	2.52288	NA	3
LmxM.33_397909	novel transcript	72.5229	32.5229	11.3979	12	6.69897	NA	NA	NA	NA	NA	2.52288	2.04576	NA
LmxM.33_445092	novel transcript	80	27.5229	39.699	44.301	7.39794	3.52288	4	NA	NA	NA	2.52288	2.09691	3.1549
LmxM.33_449797	novel transcript	Inf	35.2218	NA	NA	14.301	NA	NA	NA	5	NA	NA	NA	NA
LmxM.33_462751	novel transcript	Inf	47.1549	30.3979	96	NA	NA	NA	NA	1.92082	2.69897	NA	1.92082	NA
LmxM.33_463417	novel transcript	48	11.0458	9.52288	10	2.52288	NA	1.79588	NA	NA	NA	NA	NA	NA
LmxM.33_470078	novel transcript	91.5229	23.5229	22.5229	22.5229	11	NA	NA	7.52288	2.69897	NA	NA	NA	1.74473
LmxM.33_497824	novel transcript	171	20.1549	21.5229	21.5229	17.2218	NA	14.2218	5	14.0458	6	7	6.30103	3.69897
LmxM.33_626859	novel transcript	73.3979	45.1549	42	42.699	NA	NA	3	NA	3	NA	2.52288	NA	NA
LmxM.33_651894	novel transcript	Inf	38.5229	29.0458	29.0458	16.301	11.699	11.2218	5.39794	NA	2.22185	NA	NA	NA
LmxM.33_694644	novel transcript	133.523	10.699	9.69897	9.69897	5	5.39794	5.22185	2.69897	NA	NA	2.52288	1.37675	NA
LmxM.33_718695	novel transcript	Inf	33.1549	36	35	4	6.09691	8.22185	NA	6.09691	0.552842	3.30103	1.37675	NA
LmxM.33_733280	novel transcript	Inf	104	117.301	116.523	77.3979	77	68.699	16.3979	26.1549	NA	NA	NA	3.52288
LmxM.33_794925	novel transcript	Inf	23	23	22.2218	10.5229	NA	NA	NA	NA	NA	NA	NA	4.30103
LmxM.33_800511	novel transcript	Inf	38	50.0969	50.699	11.0458	15.699	15.301	14.2218	NA	NA	2.52288	NA	NA
LmxM.33_958610	novel transcript	Inf	88.699	80.5229	72.5229	22.1549	10	9.39794	2.69897	4	1.92082	NA	NA	NA
LmxM.33_997379	novel transcript	Inf	NA	NA	NA	11.0458	21.3979	NA	NA	NA	NA	NA	3	NA
LmxM.33_1069418	novel transcript	132.301	17.5229	16.5229	11.1549	5	NA	NA	NA	NA	NA	NA	NA	NA
LmxM.33_1079295	novel transcript	172.398	19.699	41.2218	43.5229	7.1549	NA	10.3979	NA	NA	NA	NA	NA	NA
LmxM.33_1080847	novel transcript	Inf	NA	NA	15.699	8.52288	NA	NA	NA	NA	NA	NA	NA	NA
LmxM.33_1087628	novel transcript	Inf	NA	69.301	67.301	54.2218	NA	NA	NA	NA	NA	NA	NA	NA
LmxM.33_1089101	novel transcript	162.398	53.5229	21.0458	26	NA	NA	NA	NA	NA	NA	NA	2.69897	NA
LmxM.33_1091802	novel transcript	146.398	NA	NA	NA	NA	NA	NA	NA	NA	2.69897	NA	NA	NA
LmxM.33_1093342	novel transcript	163.523	41	22.301	19.699	NA	NA	NA	NA	NA	NA	NA	5.1549	NA
LmxM.33_1117428	novel transcript	177.523	21	28.301	27.699	7.09691	6	4	NA	NA	NA	NA	NA	NA
LmxM.33_1134697	novel transcript	Inf	59.0969	51.301	51.0458	12.0458	NA	NA	NA	3.39794	4.52288	NA	3	NA
LmxM.33_1148776	novel transcript	Inf	19	20.2218	20.699	5.69897	3.52288	NA	NA	1.92082	NA	NA	NA	NA
LmxM.33_1199752	novel transcript	Inf	56.699	65.301	68.699	23	25.301	23	NA	12.1549	4.1549	3.39794	NA	3.69897
LmxM.33_1259009	novel transcript	Inf	28.0458	52.5229	52.5229	10.301	4.69897	4.1549	10.0969	NA	NA	2.52288	NA	NA
LmxM.33_1264686	novel transcript	152.523	16.5229	21.5229	21.5229	NA	NA	NA	NA	NA	2.30103	NA	NA	NA
LmxM.33_1311418	novel transcript	126.699	34.301	30.5229	43	11.301	3	6.30103	NA	NA	NA	NA	NA	1.92082
LmxM.33_1375845	novel transcript	Inf	27.699	26	26	NA	NA	NA	NA	3.52288	NA	NA	NA	NA
LmxM.33_1394122	novel transcript	Inf	24.699	25.5229	24.2218	NA	7.1549	NA	NA	NA	NA	2.22185	3.30103	NA
LmxM.33_1483084	novel transcript	Inf	43.1549	40.699	40	NA	NA	NA	NA	NA	1.61979	3.30103	1.79588	NA
LmxM.33_1495519	novel transcript	Inf	36.3979	36	32.301	9.04576	NA	NA	NA	NA	NA	NA	NA	NA
LmxM.33_1507664	novel transcript	165.699	19	22.3979	23.5229	4.39794	9	8.69897	NA	NA	NA	NA	NA	NA
LmxM.33_1587220	novel transcript	24	3.69897	2.30103	8.69897	NA	NA	NA	NA	NA	NA	1.23657	NA	NA
LmxM.33_1637722	novel transcript	118.699	15.5229	18.5229	17	6	NA	NA	NA	NA	NA	NA	3.30103	NA
LmxM.34_3476	novel transcript	Inf	Inf	Inf	Inf	Inf	Inf	Inf	Inf	Inf	138.301	139	159.523	160.301
LmxM.34_10272	novel transcript	Inf	149.699	129	129	97.301	37.699	38	12.301	27.5229	1.92082	NA	3	NA
LmxM.34_16169	novel transcript	110.699	45.0458	45.2218	45.2218	21.699	7.39794	10.5229	NA	2.30103	NA	2.22185	NA	NA
LmxM.34_94297	novel transcript	Inf	21.5229	54.301	53	12	14	8.69897	NA	NA	NA	NA	NA	NA
LmxM.34_103118	novel transcript	Inf	117	128.398	129	63.3979	21.5229	50	15.5229	45.301	NA	3.39794	6.09691	6.39794
LmxM.34_127797	novel transcript	Inf	97.699	81.0458	168.398	97.0458	50.2218	54	NA	16.699	NA	NA	NA	NA
LmxM.34_298517	novel transcript	Inf	22.301	32	32	17	NA	NA	NA	NA	NA	NA	NA	3
LmxM.34_308680	novel transcript	Inf	59.699	35	35	8	NA	NA	3.52288	NA	NA	NA	NA	NA
LmxM.34_434094	novel transcript	Inf	52.3979	44	47.5229	20.301	7.30103	NA	NA	NA	NA	2.1549	NA	NA
LmxM.34_439015	novel transcript	Inf	37.5229	57.301	86.2218	10.5229	NA	NA	NA	NA	4.69897	NA	NA	NA
LmxM.34_445567	novel transcript	120	31.699	32	31.2218	1.92082	NA	NA	NA	NA	NA	NA	NA	NA
LmxM.34_458644	novel transcript	Inf	36.2218	37	37	29	9.39794	10	NA	NA	NA	NA	NA	NA
LmxM.34_473668	novel transcript	Inf	121.398	113.523	113.523	42	94.301	93.2218	8.69897	20.5229	3.1549	3.69897	3.30103	3.52288
LmxM.34_487194	novel transcript	Inf	123.222	69.1549	117.699	17.3979	NA	NA	NA	NA	1.61979	2.04576	NA	2.04576
LmxM.34_514242	novel transcript	102.699	34.301	36.0458	36.0458	15.699	NA	-0.146128	NA	NA	NA	NA	NA	NA
LmxM.34_564584	novel transcript	Inf	37.699	64.3979	64.3979	9.52288	22.3979	NA	8.69897	2.30103	NA	2.52288	2.69897	2.39794
LmxM.34_573502	novel transcript	Inf	NA	NA	NA	16.0969	NA	NA	NA	NA	NA	2.04576	NA	NA
LmxM.34_579671	novel transcript	178.398	15.1549	20.0969	14.2218	12	NA	0.958607	NA	NA	NA	NA	NA	NA
LmxM.34_778078	novel transcript	Inf	43.1549	62.1549	63.3979	15.0458	20.0458	19.301	17.699	NA	3	4.30103	3	NA
LmxM.34_874107	novel transcript	169	56.301	45.0458	46.1549	18.2218	NA	NA	NA	NA	NA	3	NA	NA
LmxM.34_917984	novel transcript	Inf	20	20	20	5.69897	NA	NA	NA	3.69897	NA	NA	NA	NA
LmxM.34_933669	novel transcript	Inf	34.3979	40.699	41	9.22185	NA	NA	NA	NA	1.65758	3.69897	NA	2.52288
LmxM.34_1025013	novel transcript	Inf	23.699	23	25.0458	19.3979	6.69897	6.39794	13.699	NA	0.130768	NA	NA	NA
LmxM.34_1046661	novel transcript	Inf	24.5229	24.5229	22.5229	NA	NA	NA	3.39794	3.69897	NA	3	NA	NA
LmxM.34_1048422	novel transcript	Inf	68.3979	74.3979	49.2218	36.1549	43.699	43.0969	5	18.5229	NA	NA	4	NA
LmxM.34_1057821	novel transcript	Inf	38.2218	59.5229	59.5229	NA	NA	NA	NA	NA	3.1549	2.22185	NA	NA
LmxM.34_1130968	novel transcript	Inf	36.0969	30.3979	32.3979	14.5229	11.5229	12.2218	8.39794	NA	NA	NA	2.1549	NA
LmxM.34_1142057	novel transcript	Inf	23.2218	23.699	22.3979	3.39794	NA	6.30103	NA	NA	NA	NA	NA	1.69897
LmxM.34_1155140	novel transcript	Inf	50	42.5229	42.699	7.22185	11.699	11.699	NA	NA	NA	2.30103	2.30103	NA
LmxM.34_1166406	novel transcript	Inf	21.3979	39.3979	41.5229	8	5.69897	5.04576	NA	NA	3.1549	3.52288	NA	NA
LmxM.34_1168811	novel transcript	Inf	48	51.3979	67.1549	NA	NA	NA	NA	2.69897	NA	NA	NA	NA
LmxM.34_1175254	novel transcript	Inf	44.0458	54	55	31.0969	NA	NA	6.52288	13.2218	NA	NA	NA	NA
LmxM.34_1177081	novel transcript	Inf	43	54.699	55	31.0969	19.5229	21	NA	15.0969	NA	NA	NA	NA
LmxM.34_1206347	novel transcript	Inf	Inf	Inf	Inf	129.699	136	134.699	10	44.699	4	5.22185	6	2.22185
LmxM.34_1244632	novel transcript	169.097	26.3979	51	51	15.3979	17.5229	17.5229	NA	11.0458	NA	NA	NA	2.30103
LmxM.34_1289997	novel transcript	80.699	38.2218	20.3979	25.699	17.3979	3.39794	9.09691	NA	NA	2.69897	NA	NA	NA
LmxM.34_1319305	novel transcript	178.222	42.699	52.5229	48.0458	14.5229	21	22.5229	16	NA	7.1549	5.52288	NA	3.30103
LmxM.34_1333909	novel transcript	Inf	60.5229	50.3979	51	31	14.3979	22	15.699	NA	NA	4.69897	NA	NA
LmxM.34_1391494	novel transcript	Inf	40.699	69.5229	54.2218	9.04576	3.39794	4.1549	NA	NA	NA	2.69897	NA	NA
LmxM.34_1425308	novel transcript	74.2218	1.82391	12.699	12.699	1.79588	5.09691	5.39794	2.52288	NA	NA	3	1.92082	NA
LmxM.34_1467398	novel transcript	Inf	35.699	29	21.3979	9	NA	NA	NA	NA	NA	2.22185	NA	NA
LmxM.34_1567697	novel transcript	Inf	50	36.699	34.5229	19.699	5	6.30103	6	8	2.52288	2.1549	0.677781	NA
LmxM.34_1569552	novel transcript	Inf	50	49.5229	42	10.5229	24.5229	24	10.2218	26.699	NA	5.39794	3.69897	2.69897
LmxM.34_1571922	novel transcript	153.301	45	51.3979	42.0969	17	32.1549	32.1549	9.69897	29.699	0	5.39794	3.69897	NA
LmxM.34_1603515	novel transcript	Inf	32.1549	41.3979	41.5229	4.69897	NA	NA	NA	NA	2.69897	3	NA	NA
LmxM.34_1685616	novel transcript	157	34.699	27.301	28.0969	NA	NA	NA	NA	NA	NA	3.39794	4	NA
LmxM.34_1716908	novel transcript	Inf	NA	27.3979	40.0969	10.0458	NA	9.69897	3.1549	NA	2.69897	2.69897	NA	3
LmxM.34_1792304	novel transcript	Inf	37.3979	56.5229	40.0969	17.5229	NA	NA	NA	NA	NA	NA	NA	NA
LmxM.34_1814992	novel transcript	Inf	37	39.301	39.301	34.5229	33.699	33.5229	21.1549	27.5229	NA	NA	NA	4.30103
LmxM.34_1819927	novel transcript	Inf	26.1549	30.5229	30.301	NA	7.30103	NA	NA	NA	NA	NA	NA	NA
LmxM.34_1862377	novel transcript	Inf	24.5229	43.699	43.1549	9	4.30103	4.30103	NA	NA	NA	3.52288	NA	NA
LmxM.34_1884153	novel transcript	129.222	42.5229	57.0458	58.3979	NA	9.04576	6.69897	NA	NA	1.79588	NA	NA	NA
LmxM.34_1892610	novel transcript	Inf	30.5229	35.0458	38.0969	NA	13.2218	9	NA	NA	2.69897	3.09691	NA	NA
LmxM.34_1911927	novel transcript	Inf	57	49.5229	48.699	5.22185	5.1549	3.1549	2.52288	NA	NA	2.22185	NA	NA
LmxM.34_1914652	novel transcript	115.046	27.699	41.2218	41.2218	18.699	20.1549	16	7.30103	10	NA	NA	NA	NA
LmxM.34_1915492	novel transcript	142.046	57.699	119.046	77.301	35.0969	52.699	47	15.301	18.3979	3	4	NA	NA
LmxM.34_1937045	novel transcript	Inf	48.0969	74.699	90.699	NA	12.3979	18.0458	NA	12.5229	15.2218	NA	NA	NA
LmxM.27_976684	novel transcript	Inf	Inf	Inf	Inf	51.5229	111	3	161.699	Inf	64.5229	60	19	67.1549
LmxM.26_815658	novel transcript	Inf	Inf	120	Inf	88.1549	NA	44.0969	NA	NA	NA	NA	19.0969	NA
