# Supplementary material for: Comparative Life Cycle Transcriptomics Revises Leishmania mexicana Genome Annotation and Links a Chromosome Duplication with Parasitism of Vertebrates
Source: PLoS Pathog. 2015 Oct 9;11(10):e1005186. doi: 10.1371/journal.ppat.1005186 (PMC4599935; doi:10.1371/journal.ppat.1005186)
Supplement: S10 Table — (XLSX) [file ppat.1005186.s014.xlsx]

## Sheet: unique_peptides_mapping_to_exte
Table S10. Mass spectrometry evidence for extended CDS. Coordinates and sequences of unique peptides mapping to 116 predicted N-terminal extensions, confirming the RNA-seq guided gene model.
Gene ID	Extended CDS start	Extended CDS end	Strand	Reference CDS start	Reference CDS end	Peptide start	Peptide end	Peptide strand	Peptide_info
LmxM.01.0320	78491	79510	+	78587	79510	78494	78565	+	LmxM.01.0320_peptide_LmxM.01.0320_TQSVSIGADHRLEATTSDCVSSVR
LmxM.01.0320	78491	79510	+	78587	79510	78494	78526	+	LmxM.01.0320_peptide_LmxM.01.0320_TQSVSIGADHR
LmxM.03.0080	19673	21826	+	20144	21826	20078	20104	+	LmxM.03.0080_peptide_LmxM.03.0080_VNLVEEVSR
LmxM.03.0200	49348	51030	+	49414	51030	49390	49449	+	LmxM.03.0200_peptide_LmxM.03.0200_SPPVLNEPMDNFEPGSASAK
LmxM.03.0210	52682	53821	+	52958	53821	52931	52996	+	LmxM.03.0210_peptide_LmxM.03.0210_SEEKDVYVAMDYIPADLSSVIK
LmxM.03.0230	56837	58954	+	56984	58954	56909	56947	+	LmxM.03.0230_peptide_LmxM.03.0230_EYSSYGAQSVAVK
LmxM.03.0230	56837	58954	+	56984	58954	56900	56947	+	LmxM.03.0230_peptide_LmxM.03.0230_AYREYSSYGAQSVAVK
LmxM.03.0430	135296	135628	+	135335	135628	135299	135391	+	LmxM.03.0430_peptide_LmxM.03.0430_SAETLACTYAALMLSDAGLPTSAENIAAAVK
LmxM.03.0430	135296	135628	+	135335	135628	135299	135439	+	LmxM.03.0430_peptide_LmxM.03.0430_SAETLACTYAALMLSDAGLPTSAENIAAAVKAAGVEMRPTLPIIFAR
LmxM.03.0690	250685	257320	-	250685	256870	256907	256957	-	LmxM.03.0690_peptide_LmxM.03.0690_FLASFAGQPAAIVCIQK
LmxM.03.0690	250685	257320	-	250685	256870	256856	256906	-	LmxM.03.0690_peptide_LmxM.03.0690_ALTEVAVDFHYAMARPR
LmxM.04.0050	23073	24668	+	23094	24668	23079	23195	+	LmxM.04.0050_peptide_LmxM.04.0050_SSELIMEQGPSRLEAHSMTNESPSNQAHEQSSLEPQLEK
LmxM.04.0050	23073	24668	+	23094	24668	23079	23114	+	LmxM.04.0050_peptide_LmxM.04.0050_SSELIMEQGPSR
LmxM.04.0580	221584	222486	-	221584	222435	222406	222483	-	LmxM.04.0580_peptide_LmxM.04.0580_PGPGLLSDGWFREESTMWPGQAQGLK
LmxM.04.0580	221584	222486	-	221584	222435	222448	222483	-	LmxM.04.0580_peptide_LmxM.04.0580_PGPGLLSDGWFR
LmxM.04.0630	245957	246559	-	245957	246553	246461	246556	-	LmxM.04.0630_peptide_LmxM.04.0630_TMNFGNMTLGGAMATFGGQSNPMCNYTSPLAK
LmxM.04.1000	353933	357457	-	353933	357340	357398	357457	-	LmxM.04.1000_peptide_LmxM.04.1000_MQLSPGDFEGAVAGPPLHYR
LmxM.04.1160	395875	396930	-	395875	396837	396811	396855	-	LmxM.04.1160_peptide_LmxM.04.1160_GEFTLLMMAIQTSVK
LmxM.04.1160	395875	396930	-	395875	396837	396877	396915	-	LmxM.04.1160_peptide_LmxM.04.1160_TPTPTTLTQYIIK
LmxM.04.1160	395875	396930	-	395875	396837	396877	396918	-	LmxM.04.1160_peptide_LmxM.04.1160_RTPTPTTLTQYIIK
LmxM.06.0350	118082	119305	-	118082	119173	119258	119293	-	LmxM.06.0350_peptide_LmxM.06.0350_ELNPLLSPEQKR
LmxM.06.0350	118082	119305	-	118082	119173	119159	119182	-	LmxM.06.0350_peptide_LmxM.06.0350_LVEMLVER
LmxM.06.0350	118082	119305	-	118082	119173	119183	119221	-	LmxM.06.0350_peptide_LmxM.06.0350_CVVTGGTGFVGTR
LmxM.06.0540	185883	188474	+	186354	188474	186267	186377	+	LmxM.06.0540_peptide_LmxM.06.0540_APPYADATEVASHAHSAAAPEDDAGPVESMNSSAATR
LmxM.07.0340	152493	154172	-	152493	153740	153783	153812	-	LmxM.07.0340_peptide_LmxM.07.0340_SEEEIATWLR
LmxM.07.0340	152493	154172	-	152493	153740	153753	153782	-	LmxM.07.0340_peptide_LmxM.07.0340_ENSITIYGDR
LmxM.08.0080	1176767	1179367	+	1177310	1179367	1177019	1177078	+	LmxM.08.0080_peptide_LmxM.08.0080_AQAGDATSATAQNDPAAFLR
LmxM.08.0560	1380030	1380860	+	1380147	1380860	1380108	1380158	+	LmxM.08.0560_peptide_LmxM.08.0560_SPAGQFVNVVPEGMQPR
LmxM.09.0400	145999	147408	+	146140	147408	145999	146046	+	LmxM.09.0400_peptide_LmxM.09.0400_MDSSSAAADAGGAAAR
LmxM.09.1220	449224	453333	-	449224	453048	453211	453294	-	LmxM.09.1220_peptide_LmxM.09.1220_SSVGPPAEPLQGTPTHATAAAAAATLPR
LmxM.09.1320	485712	487532	-	485712	487529	487488	487532	-	LmxM.09.1320_peptide_LmxM.09.1320_MMSSSAIVLPTYPSR
LmxM.09.1320	485712	487532	-	485712	487529	487461	487532	-	LmxM.09.1320_peptide_LmxM.09.1320_MMSSSAIVLPTYPSRDVQNVENHR
LmxM.09.1430	512621	513337	-	512621	513184	513290	513337	-	LmxM.09.1430_peptide_LmxM.09.1430_MQWVPFIATGAALAHR
LmxM.09.1430	512621	513337	-	512621	513184	513155	513259	-	LmxM.09.1430_peptide_LmxM.09.1430_AIRDPTDVDAVSAVGELSSLDSLENMKNCMMADQR
LmxM.09.1510	530862	535790	-	530862	535496	535653	535676	-	LmxM.09.1510_peptide_LmxM.09.1510_IAVIYEAR
LmxM.09.1510	530862	535790	-	530862	535496	535608	535652	-	LmxM.09.1510_peptide_LmxM.09.1510_KGAQPSAEEIESQLR
LmxM.09.1510	530862	535790	-	530862	535496	535581	535607	-	LmxM.09.1510_peptide_LmxM.09.1510_VAQYPLAPR
LmxM.09.1540	538884	540875	-	538884	540707	540828	540872	-	LmxM.09.1540_peptide_LmxM.09.1540_SGTPAIGAHENLASR
LmxM.10.0160	53969	56083	+	54587	56083	54284	54331	+	LmxM.10.0160_peptide_LmxM.10.0160_MNATGMNVSALSPHGR
LmxM.10.0270	102154	105075	+	102295	105075	102157	102222	+	LmxM.10.0270_peptide_LmxM.10.0270_PSSSVQGTSSSALDGEGAHVAR
LmxM.10.0370	150216	152303	+	150495	152303	150372	150416	+	LmxM.10.0370_peptide_LmxM.10.0370_RVPVFGEAVEGYGPK
LmxM.10.0370	150216	152303	+	150495	152303	150375	150416	+	LmxM.10.0370_peptide_LmxM.10.0370_VPVFGEAVEGYGPK
LmxM.10.0370	150216	152303	+	150495	152303	150456	150479	+	LmxM.10.0370_peptide_LmxM.10.0370_GVADQILR
LmxM.10.0370	150216	152303	+	150495	152303	150321	150356	+	LmxM.10.0370_peptide_LmxM.10.0370_YIHPEAASLFAR
LmxM.10.0370	150216	152303	+	150495	152303	150480	150530	+	LmxM.10.0370_peptide_LmxM.10.0370_GQTYAMMMDRYGIDVAR
LmxM.10.0370	150216	152303	+	150495	152303	150480	150509	+	LmxM.10.0370_peptide_LmxM.10.0370_GQTYAMMMDR
LmxM.10.0700	300384	303260	-	300384	302843	303135	303176	-	LmxM.10.0700_peptide_LmxM.10.0700_EAPLLEITDVQFIR
LmxM.11.0090	24777	26777	+	25197	26777	24855	24893	+	LmxM.11.0090_peptide_LmxM.11.0090_TITTVDSYVGGTR
LmxM.11.0400	128608	132495	+	129157	132495	128866	128898	+	LmxM.11.0400_peptide_LmxM.11.0400_RVTADLQAAHK
LmxM.11.0400	128608	132495	+	129157	132495	128929	128955	+	LmxM.11.0400_peptide_LmxM.11.0400_ALSVQLESR
LmxM.11.0590	209565	211640	+	210036	211640	209802	209900	+	LmxM.11.0590_peptide_LmxM.11.0590_SAEEPRVEATPTPSEATAAPAAAATPAPATLIK
LmxM.11.0590	209565	211640	+	210036	211640	209958	210035	+	LmxM.11.0590_peptide_LmxM.11.0590_STSQSPNILRFPANTSDPTFQENMAR
LmxM.11.0590	209565	211640	+	210036	211640	209988	210035	+	LmxM.11.0590_peptide_LmxM.11.0590_FPANTSDPTFQENMAR
LmxM.11.0590	209565	211640	+	210036	211640	209958	209987	+	LmxM.11.0590_peptide_LmxM.11.0590_STSQSPNILR
LmxM.11.0590	209565	211640	+	210036	211640	209925	209957	+	LmxM.11.0590_peptide_LmxM.11.0590_LYAHHPIDYER
LmxM.11.0820	301753	303180	+	302167	303180	301825	301875	+	LmxM.11.0820_peptide_LmxM.11.0820_HTPAKEEASVSTGPQVK
LmxM.11.0820	301753	303180	+	302167	303180	301915	301974	+	LmxM.11.0820_peptide_LmxM.11.0820_SFLDALRSGKKPAAPIAAAR
LmxM.11.0820	301753	303180	+	302167	303180	301876	301935	+	LmxM.11.0820_peptide_LmxM.11.0820_SQISNSAPAPAGKSFLDALR
LmxM.11.0820	301753	303180	+	302167	303180	301975	302067	+	LmxM.11.0820_peptide_LmxM.11.0820_VTVPAAAPAEDTQAAAAAAPPAPAAVVTPAK
LmxM.11.0820	301753	303180	+	302167	303180	301975	302103	+	LmxM.11.0820_peptide_LmxM.11.0820_VTVPAAAPAEDTQAAAAAAPPAPAAVVTPAKESPAPEPPKEER
LmxM.11.0820	301753	303180	+	302167	303180	301936	301974	+	LmxM.11.0820_peptide_LmxM.11.0820_SGKKPAAPIAAAR
LmxM.11.0820	301753	303180	+	302167	303180	301876	301914	+	LmxM.11.0820_peptide_LmxM.11.0820_SQISNSAPAPAGK
LmxM.11.0890	345891	348932	+	345909	348932	345894	345977	+	LmxM.11.0890_peptide_LmxM.11.0890_GDTAAMTPLPQQPPTPPVASPYITPEPK
LmxM.12.0640	326595	328841	+	327210	328841	326820	326900	+	LmxM.12.0640_peptide_LmxM.12.0640_TPAQLLANHSGGDSQGAVSDVVSPVER
LmxM.12.0850	357480	360620	+	359820	360620	357612	357644	+	LmxM.12.0850_peptide_LmxM.12.0850_NTLTVLQAFAR
LmxM.12.0850	357480	360620	+	359820	360620	358314	358337	+	LmxM.12.0850_peptide_LmxM.12.0850_GLTIVILR
LmxM.12.0850	357480	360620	+	359820	360620	357948	357974	+	LmxM.12.0850_peptide_LmxM.12.0850_SLTSLTVEK
LmxM.13.0040	9231	10298	-	9231	10115	10116	10148	-	LmxM.13.0040_peptide_LmxM.13.0040_LLVAQEAALVR
LmxM.13.0120	33874	34344	-	33874	34233	34210	34320	-	LmxM.13.0120_peptide_LmxM.13.0120_VPSAAAAGSTAAPTDAGSASSSPTLTAEEMNEFAELR
LmxM.13.0140	42045	42809	-	42045	42605	42657	42707	-	LmxM.13.0140_peptide_LmxM.13.0140_SAPWVTPEVAPAYPSAR
LmxM.13.0480	129298	131574	+	129460	131574	129298	129333	+	LmxM.13.0480_peptide_LmxM.13.0480_MWASFLDQIQQR
LmxM.13.1110	362212	363813	-	362212	363762	363748	363795	-	LmxM.13.1110_peptide_LmxM.13.1110_TVAAAAAATTSMSSTR
LmxM.14.0220	56155	57870	+	56506	57870	56155	56199	+	LmxM.14.0220_peptide_LmxM.14.0220_MLSNNANPFEEEYQR
LmxM.14.0290	79537	80568	+	79726	80568	79549	79599	+	LmxM.14.0290_peptide_LmxM.14.0290_LLLFGGTGFVGSLVAQK
LmxM.14.1440	590332	593316	+	590416	593316	590416	590490	+	LmxM.14.1440_peptide_LmxM.14.1440_MYAQMPEIYLCPCCSEFSKQEERER
LmxM.14.1440	590332	593316	+	590416	593316	590335	590391	+	LmxM.14.1440_peptide_LmxM.14.1440_SLFGEALPFEDDTATSLIR
LmxM.14.1440	590332	593316	+	590416	593316	590335	590394	+	LmxM.14.1440_peptide_LmxM.14.1440_SLFGEALPFEDDTATSLIRR
LmxM.15.0130	40165	42498	-	40165	42114	42118	42177	-	LmxM.15.0130_peptide_LmxM.15.0130_TAGAAGAAATIEGSEQTQEK
LmxM.16.0180	62736	63500	-	62736	63188	63171	63233	-	LmxM.16.0180_peptide_LmxM.16.0180_RPFNAAWSNSGSTSLMEDAPR
LmxM.16.0180	62736	63500	-	62736	63188	63441	63497	-	LmxM.16.0180_peptide_LmxM.16.0180_SDKRPGVPNSGGYVAPNAR
LmxM.16.0980	347955	351431	+	349236	351431	348906	348965	+	LmxM.16.0980_peptide_LmxM.16.0980_SLVHYVAPPGDTAIPSYGCR
LmxM.16.0980	347955	351431	+	349236	351431	348966	349007	+	LmxM.16.0980_peptide_LmxM.16.0980_DIATGSDAGYSPSR
LmxM.16.0980	347955	351431	+	349236	351431	349155	349205	+	LmxM.16.0980_peptide_LmxM.16.0980_YADEAAAAREEHEAQTR
LmxM.16.1420	567662	569242	-	567662	568732	568868	568909	-	LmxM.16.1420_peptide_LmxM.16.1420_AASSTSGASASQAR
LmxM.16.1420	567662	569242	-	567662	568732	569072	569119	-	LmxM.16.1420_peptide_LmxM.16.1420_CQSIAHDDLTVAEGPR
LmxM.16.1420	567662	569242	-	567662	568732	569150	569230	-	LmxM.16.1420_peptide_LmxM.16.1420_EQSPSIMIDSDANSLTSSPSYSEHNIR
LmxM.16.1420	567662	569242	-	567662	568732	568724	568768	-	LmxM.16.1420_peptide_LmxM.16.1420_FATTVSQTPSASMPR
LmxM.16.1420	567662	569242	-	567662	568732	568769	568846	-	LmxM.16.1420_peptide_LmxM.16.1420_LSTASAATPASPAAGATRPLSVPAAR
LmxM.16.1420	567662	569242	-	567662	568732	568997	569050	-	LmxM.16.1420_peptide_LmxM.16.1420_NGSRVPIQTNSIDAEKPR
LmxM.16.1420	567662	569242	-	567662	568732	568910	568996	-	LmxM.16.1420_peptide_LmxM.16.1420_TASMNSNGALQPTVTVPNLHLSGLQAQLR
LmxM.16.1420	567662	569242	-	567662	568732	568997	569038	-	LmxM.16.1420_peptide_LmxM.16.1420_VPIQTNSIDAEKPR
LmxM.16.1460	587206	595222	-	587206	594904	595037	595102	-	LmxM.16.1460_peptide_LmxM.16.1460_GAPTTPAAAGPAGSPAPPLPPR
LmxM.16.1460	587206	595222	-	587206	594904	594962	595000	-	LmxM.16.1460_peptide_LmxM.16.1460_ESPRPQSTTAFER
LmxM.16.1460	587206	595222	-	587206	594904	595013	595036	-	LmxM.16.1460_peptide_LmxM.16.1460_TPEPPSAR
LmxM.17.0150	103723	105852	-	103723	104895	105103	105135	-	LmxM.17.0150_peptide_LmxM.17.0150_AEEAVAELKPR
LmxM.17.0150	103723	105852	-	103723	104895	105316	105384	-	LmxM.17.0150_peptide_LmxM.17.0150_AGSGSSGTSHSETLFAVSAALPR
LmxM.17.0150	103723	105852	-	103723	104895	105673	105717	-	LmxM.17.0150_peptide_LmxM.17.0150_DRFDDAGDVAASVLR
LmxM.17.0150	103723	105852	-	103723	104895	105739	105792	-	LmxM.17.0150_peptide_LmxM.17.0150_DRPMGSAVTVDLAALLTR
LmxM.17.0150	103723	105852	-	103723	104895	105628	105672	-	LmxM.17.0150_peptide_LmxM.17.0150_IEALADDVLDYLLHR
LmxM.17.0150	103723	105852	-	103723	104895	105811	105852	-	LmxM.17.0150_peptide_LmxM.17.0150_MDVIPLVAQEIVAR
LmxM.17.0150	103723	105852	-	103723	104895	105136	105204	-	LmxM.17.0150_peptide_LmxM.17.0150_TAGVDLMSLSTTVDTPLAELEAK
LmxM.17.0150	103723	105852	-	103723	104895	104902	104922	-	LmxM.17.0150_peptide_LmxM.17.0150_LLLAELR
LmxM.17.0150	103723	105852	-	103723	104895	105292	105315	-	LmxM.17.0150_peptide_LmxM.17.0150_AQVTAFLR
LmxM.17.0300	139937	140749	-	139937	140545	140579	140632	-	LmxM.17.0300_peptide_LmxM.17.0300_GVAAATGGGSASLDSEKR
LmxM.17.0300	139937	140749	-	139937	140545	140633	140671	-	LmxM.17.0300_peptide_LmxM.17.0300_GTADESSTGTDAR
LmxM.17.0760	311322	312575	-	311322	312296	312384	312440	-	LmxM.17.0760_peptide_LmxM.17.0760_EGVGGVPPPPAPPVNTAER
LmxM.17.0810	382511	383965	-	382511	383650	383798	383839	-	LmxM.17.0810_peptide_LmxM.17.0810_GAVSASHLATEGTR
LmxM.18.0350	142215	143414	-	142215	143129	143142	143198	-	LmxM.18.0350_peptide_LmxM.18.0350_NVPSEPGAHAELSTAELER
LmxM.20.0230	2714061	2714636	-	2714061	2714510	2714529	2714576	-	LmxM.20.0230_peptide_LmxM.20.0230_AAGSSSPASASSLDAR
LmxM.20.0300	2745392	2746624	+	2745692	2746624	2745623	2745685	+	LmxM.20.0300_peptide_LmxM.20.0300_SASTNIYGAEDPNLTCPAELR
LmxM.20.1520	3280506	3285506	-	3280506	3285257	3285276	3285314	-	LmxM.20.1520_peptide_LmxM.20.1520_SFNSDVDAAQQQR
LmxM.20.1520	3280506	3285506	-	3280506	3285257	3285366	3285395	-	LmxM.20.1520_peptide_LmxM.20.1520_AAGGGTLHER
LmxM.20.1650	3296285	3296806	-	3296285	3296710	3296744	3296803	-	LmxM.20.1650_peptide_LmxM.20.1650_SVAPQYYHAHAVDATIQHEK
LmxM.20.1650	3296285	3296806	-	3296285	3296710	3296732	3296803	-	LmxM.20.1650_peptide_LmxM.20.1650_SVAPQYYHAHAVDATIQHEKAYQR
LmxM.20.1650	3296285	3296806	-	3296285	3296710	3296693	3296731	-	LmxM.20.1650_peptide_LmxM.20.1650_QTAVNENMHRPSR
LmxM.22.0480	183333	185126	-	183333	184667	184761	184838	-	LmxM.22.0480_peptide_LmxM.22.0480_AGDGSGASAALPSLSSASSHAAAQAR
LmxM.22.0980	391169	393943	+	391817	393943	391523	391585	+	LmxM.22.0980_peptide_LmxM.22.0980_SAATLLAEATGAPPPPPAPSR
LmxM.22.0980	391169	393943	+	391817	393943	391172	391213	+	LmxM.22.0980_peptide_LmxM.22.0980_SNSYSPFSTAPVAR
LmxM.22.1500	604934	608593	+	605330	608593	604976	605041	+	LmxM.22.1500_peptide_LmxM.22.1500_RGDHSQQGYLAAQGINDQLSEK
LmxM.22.1500	604934	608593	+	605330	608593	605261	605326	+	LmxM.22.1500_peptide_LmxM.22.1500_AFVDDKDSNELSFPSTLTPAQR
LmxM.23.0020	5809	7110	+	5959	7110	5848	5898	+	LmxM.23.0020_peptide_LmxM.23.0020_LLDALFDNTSSFGILSK
LmxM.23.0020	5809	7110	+	5959	7110	5848	5901	+	LmxM.23.0020_peptide_LmxM.23.0020_LLDALFDNTSSFGILSKR
LmxM.23.0020	5809	7110	+	5959	7110	5812	5841	+	LmxM.23.0020_peptide_LmxM.23.0020_SVDYLNAVER
LmxM.23.0020	5809	7110	+	5959	7110	5812	5847	+	LmxM.23.0020_peptide_LmxM.23.0020_SVDYLNAVERSR
LmxM.23.0020	5809	7110	+	5959	7110	5842	5898	+	LmxM.23.0020_peptide_LmxM.23.0020_SRLLDALFDNTSSFGILSK
LmxM.23.0560	249592	252054	-	249592	251562	251638	251682	-	LmxM.23.0560_peptide_LmxM.23.0560_NITSEDAAEGTEAFK
LmxM.23.0560	249592	252054	-	249592	251562	251632	251682	-	LmxM.23.0560_peptide_LmxM.23.0560_NITSEDAAEGTEAFKNR
LmxM.23.0560	249592	252054	-	249592	251562	251542	251595	-	LmxM.23.0560_peptide_LmxM.23.0560_VRPFIKEELAEMEGQERR
LmxM.23.0560	249592	252054	-	249592	251562	251608	251631	-	LmxM.23.0560_peptide_LmxM.23.0560_VSEITSFR
LmxM.23.0560	249592	252054	-	249592	251562	251545	251577	-	LmxM.23.0560_peptide_LmxM.23.0560_EELAEMEGQER
LmxM.23.1110	507639	510011	-	507639	509732	509949	510008	-	LmxM.23.1110_peptide_LmxM.23.1110_SSSGGPSTLLGSSPSKDVAR
LmxM.26.0850	232893	234146	-	232893	233858	233844	233903	-	LmxM.26.0850_peptide_LmxM.26.0850_AGDGGEDPFAFEFDPMAGVR
LmxM.26.1000	287461	288963	-	287461	288474	288454	288480	-	LmxM.26.1000_peptide_LmxM.26.1000_AVMHSAAVR
LmxM.26.1020	293411	305767	+	293630	305767	293546	293599	+	LmxM.26.1020_peptide_LmxM.26.1020_FQSPSSFIFHGSSAASEK
LmxM.26.1020	293411	305767	+	293630	305767	293411	293437	+	LmxM.26.1020_peptide_LmxM.26.1020_MNPDNSSFR
LmxM.26.1020	293411	305767	+	293630	305767	293411	293440	+	LmxM.26.1020_peptide_LmxM.26.1020_MNPDNSSFRK
LmxM.26.1020	293411	305767	+	293630	305767	293519	293545	+	LmxM.26.1020_peptide_LmxM.26.1020_TQNAPQLYK
LmxM.26.1550	534245	536689	+	534509	536689	534431	534463	+	LmxM.26.1550_peptide_LmxM.26.1550_NRLWQTHQAGR
LmxM.26.1550	534245	536689	+	534509	536689	534494	534517	+	LmxM.26.1550_peptide_LmxM.26.1550_IAWIVMNR
LmxM.26.2490	943095	947780	+	943347	947780	943095	943169	+	LmxM.26.2490_peptide_LmxM.26.2490_MESHMDPVGEVGSVSPEHQPSAGVR
LmxM.26.2600	986711	989158	+	987077	989158	986792	986860	+	LmxM.26.2600_peptide_LmxM.26.2600_GGLSELNESSDNFDDVVAHVTSR
LmxM.26.2600	986711	989158	+	987077	989158	986861	986914	+	LmxM.26.2600_peptide_LmxM.26.2600_AAAPPSSSAGVTEVGVPR
LmxM.26.2600	986711	989158	+	987077	989158	986987	987064	+	LmxM.26.2600_peptide_LmxM.26.2600_AQTDTQTDPGGGPSAADVDGAASLHR
LmxM.27.0160	37680	38675	-	37680	38465	38433	38471	-	LmxM.27.0160_peptide_LmxM.27.0160_IDMNASFGGSFAR
LmxM.27.2130	888045	893600	-	888045	893126	893133	893174	-	LmxM.27.2130_peptide_LmxM.27.2130_SLLLGYGGGPSLAR
LmxM.27.2180	914474	915652	-	914474	915337	915413	915463	-	LmxM.27.2180_peptide_LmxM.27.2180_GAVSSSESPSASSSMTR
LmxM.27.2250	939144	940331	-	939144	939884	939858	939905	-	LmxM.27.2250_peptide_LmxM.27.2250_AGILLGNMGLVDAYDR
LmxM.28.0330	97925	100903	+	98141	100903	98015	98056	+	LmxM.28.0330_peptide_LmxM.28.0330_DIGCGIVDCPLCVK
LmxM.28.0610	211032	223820	-	211032	223727	223737	223820	-	LmxM.28.0610_peptide_LmxM.28.0610_MLQSFLRPQSGATTVATGDDEEPTAPVR
LmxM.28.0740	262470	263771	-	262470	263654	263664	263714	-	LmxM.28.0740_peptide_LmxM.28.0740_STDSVPADEDALKEFLR
LmxM.28.0740	262470	263771	-	262470	263654	263715	263747	-	LmxM.28.0740_peptide_LmxM.28.0740_NTNGALAYSHR
LmxM.28.0890	312902	315310	+	312911	315310	312902	312943	+	LmxM.28.0890_peptide_LmxM.28.0890_METMSDSAPMIIKR
LmxM.28.1720	648270	650138	-	648270	649670	649977	650030	-	LmxM.28.1720_peptide_LmxM.28.1720_NAAQQSNAAAGSASATAK
LmxM.28.2570	987238	990633	+	987553	990633	987553	987618	+	LmxM.28.2570_peptide_LmxM.28.2570_MGSSGVTAGGSTPLFASGSTPR
LmxM.29.0150	45520	46464	-	45520	46170	46159	46197	-	LmxM.29.0150_peptide_LmxM.29.0150_GLPTLCDGVMACR
LmxM.29.0150	45520	46464	-	45520	46170	46378	46416	-	LmxM.29.0150_peptide_LmxM.29.0150_MTNLESLDLKDNK
LmxM.29.0450	145989	147338	-	145989	146915	147273	147335	-	LmxM.29.0450_peptide_LmxM.29.0450_STPLDVRAAEYSPSFAVTVKR
LmxM.29.0450	145989	147338	-	145989	146915	147156	147209	-	LmxM.29.0450_peptide_LmxM.29.0450_TGINTTYPMPPPPPMPEK
LmxM.29.0580	183785	185362	-	183785	185224	185201	185266	-	LmxM.29.0580_peptide_LmxM.29.0580_SAPGAATAASSGPYMPAYSEVK
LmxM.29.0760	235293	238706	+	235530	238706	235353	235412	+	LmxM.29.0760_peptide_LmxM.29.0760_GVDTPEYTIICAQAPDAARR
LmxM.29.0760	235293	238706	+	235530	238706	235434	235487	+	LmxM.29.0760_peptide_LmxM.29.0760_LQTSTESSAAQNVTLLLR
LmxM.29.0760	235293	238706	+	235530	238706	235293	235352	+	LmxM.29.0760_peptide_LmxM.29.0760_MEDIFDQMVCGSPMQQLNLK
LmxM.29.0760	235293	238706	+	235530	238706	235353	235409	+	LmxM.29.0760_peptide_LmxM.29.0760_GVDTPEYTIICAQAPDAAR
LmxM.29.0890	281289	282380	+	281550	282380	281427	281456	+	LmxM.29.0890_peptide_LmxM.29.0890_TLFETILTDR
LmxM.29.1110	366089	368671	+	366812	368671	366350	366469	+	LmxM.29.1110_peptide_LmxM.29.1110_YPMPPGHSGGGAPLPPLGGGPPAPPQQPAPSGAPPSNAPR
LmxM.29.1380	470231	471433	+	470462	471433	470375	470476	+	LmxM.29.1380_peptide_LmxM.29.1380_SFGCPALEIKHPVPTAVVADLTGSAGAGPMMALR
LmxM.29.2440	896050	898734	-	896050	898374	898573	898629	-	LmxM.29.2440_peptide_LmxM.29.2440_GGDGAPAAAADLFSAALQR
LmxM.29.3130	1115722	1118646	-	1115722	1118625	1118566	1118640	-	LmxM.29.3130_peptide_LmxM.29.3130_SLTPEMAATYDPAAVEADWYPWWEK
LmxM.29.3170	1138056	1139396	-	1138056	1139291	1139286	1139318	-	LmxM.29.3170_peptide_LmxM.29.3170_QKEEENFAAMR
LmxM.29.3170	1138056	1139396	-	1138056	1139291	1139319	1139348	-	LmxM.29.3170_peptide_LmxM.29.3170_YKAVQAELAR
LmxM.31.0050	17980	19023	-	17980	18981	18991	19017	-	LmxM.31.0050_peptide_LmxM.31.0050_AQTFPQQPR
LmxM.31.0470	172072	175260	-	172072	174726	175018	175044	-	LmxM.31.0470_peptide_LmxM.31.0470_FDAAIVCSR
LmxM.31.0470	172072	175260	-	172072	174726	175057	175080	-	LmxM.31.0470_peptide_LmxM.31.0470_ELTASFQR
LmxM.31.1360	518770	522099	+	520045	522099	519793	519849	+	LmxM.31.1360_peptide_LmxM.31.1360_GASPNSLSPSEAGNAAPVR
LmxM.31.1360	518770	522099	+	520045	522099	519346	519432	+	LmxM.31.1360_peptide_LmxM.31.1360_RPPLTSPSGSPLSLQQQQQQQQLQNTGAR
LmxM.31.1360	518770	522099	+	520045	522099	519904	519984	+	LmxM.31.1360_peptide_LmxM.31.1360_SETVSQQHQPQQQQEQSVAGSTSLGPR
LmxM.31.1360	518770	522099	+	520045	522099	519433	519489	+	LmxM.31.1360_peptide_LmxM.31.1360_YTAPQPPPLSQSLPPAIPR
LmxM.31.1360	518770	522099	+	520045	522099	518968	519051	+	LmxM.31.1360_peptide_LmxM.31.1360_TSKPVATAPAPSAENYETPNTIAAAGAK
LmxM.31.1360	518770	522099	+	520045	522099	518905	518967	+	LmxM.31.1360_peptide_LmxM.31.1360_SLAGAGPASNDDVPLLSGFKR
LmxM.31.2020	782071	782736	-	782071	782553	782554	782595	-	LmxM.31.2020_peptide_LmxM.31.2020_EVCFYEEAPGVGVK
LmxM.31.3050	1189560	1192649	+	1190172	1192649	1190112	1190168	+	LmxM.31.3050_peptide_LmxM.31.3050_NAGASGDAPQLSDLQESLR
LmxM.31.3320	1316993	1318294	+	1317380	1318294	1316996	1317055	+	LmxM.31.3320_peptide_LmxM.31.3320_AALREVSNLASNLGADIKQR
LmxM.31.3450	1378848	1380743	+	1379064	1380743	1378866	1378913	+	LmxM.31.3450_peptide_LmxM.31.3450_STEPTGLSSNAVSVPR
LmxM.32.0620	210385	211638	+	210730	211638	210412	210468	+	LmxM.32.0620_peptide_LmxM.32.0620_KQPVEDATGPTNALGVDDR
LmxM.32.0620	210385	211638	+	210730	211638	210499	210528	+	LmxM.32.0620_peptide_LmxM.32.0620_MLNYETSFCR
LmxM.32.1530	610357	611073	+	610528	611073	610435	610554	+	LmxM.32.1530_peptide_LmxM.32.1530_ADVSTDTATAHSTPPAYPGSDEPLPSYVSIVMSDIPIAAK
LmxM.32.1890	720680	722590	+	720920	722590	720758	720811	+	LmxM.32.1890_peptide_LmxM.32.1890_AVAVSPSSTTTATAAAAK
LmxM.32.2040	788708	791440	+	789077	791440	788906	788998	+	LmxM.32.2040_peptide_LmxM.32.2040_TYAEWYLPSASGSNAFPSPGSVSNAATAAVR
LmxM.32.2830	1151678	1152850	+	1152140	1152850	1152005	1152043	+	LmxM.32.2830_peptide_LmxM.32.2830_SADLGTASSGPVR
LmxM.32.2830	1151678	1152850	+	1152140	1152850	1151921	1151983	+	LmxM.32.2830_peptide_LmxM.32.2830_SHGDATAEPNNSSNMYAESAR
LmxM.32.3090	1356366	1360700	+	1356480	1360700	1356432	1356464	+	LmxM.32.3090_peptide_LmxM.32.3090_DLTDASLAAER
LmxM.33.0850	359295	360566	+	359676	360566	359508	359552	+	LmxM.33.0850_peptide_LmxM.33.0850_NSSVSSTSSSSSATK
LmxM.33.1030	440724	441890	+	441126	441890	440775	440828	+	LmxM.33.1030_peptide_LmxM.33.1030_TSVVNTSSTTSVVASPAR
LmxM.33.1060	452063	454429	+	452558	454429	452447	452506	+	LmxM.33.1060_peptide_LmxM.33.1060_EKPTPPAQGENVNDTFAKDR
LmxM.33.1060	452063	454429	+	452558	454429	452207	452245	+	LmxM.33.1060_peptide_LmxM.33.1060_TPSEGAQAAPAAR
LmxM.33.1060	452063	454429	+	452558	454429	452519	452542	+	LmxM.33.1060_peptide_LmxM.33.1060_GFEAFYAK
LmxM.33.1520	664127	664588	-	664127	664525	664529	664588	-	LmxM.33.1520_peptide_LmxM.33.1520_MDNFQTTFEAFASFGSAPSK
LmxM.33.1520	664127	664588	-	664127	664525	664502	664588	-	LmxM.33.1520_peptide_LmxM.33.1520_MDNFQTTFEAFASFGSAPSKEMDNSHFSK
LmxM.33.4120	1557175	1558113	+	1557289	1558113	1557223	1557282	+	LmxM.33.4120_peptide_LmxM.33.4120_TSPTIVESPAAISYALASFR
LmxM.34.0320	76640	78271	+	76691	78271	76643	76714	+	LmxM.34.0320_peptide_LmxM.34.0320_STAAMIHDSLQAASTPMSEAALKR
LmxM.34.1080	412446	414980	+	413454	414980	412629	412685	+	LmxM.34.1080_peptide_LmxM.34.1080_FGAESGDGGGDAASVASSR
LmxM.34.1360	506280	507824	+	506475	507824	506280	506321	+	LmxM.34.1360_peptide_LmxM.34.1360_MESGHADAGASGHR
LmxM.34.2270	841903	846795	+	843343	846795	841906	841965	+	LmxM.34.2270_peptide_LmxM.34.2270_SGHNPNRAEEPGSGGGAPAR
LmxM.34.2270	841903	846795	+	843343	846795	842911	843003	+	LmxM.34.2270_peptide_LmxM.34.2270_SQLAGMPAHLSQSSGAPLPSAAAPFNAPSPK
LmxM.34.2270	841903	846795	+	843343	846795	842023	842070	+	LmxM.34.2270_peptide_LmxM.34.2270_GQASPPVPSGEGGPIR
LmxM.34.3890	1439666	1440103	-	1439666	1440085	1440056	1440094	-	LmxM.34.3890_peptide_LmxM.34.3890_STLMKEAFELLQR
LmxM.36.0950	352262	365074	+	352463	365074	352385	352423	+	LmxM.36.0950_peptide_LmxM.36.0950_EVTTAAPATLHSR
LmxM.36.3070	1218947	1219837	-	1218947	1219651	1219622	1219669	-	LmxM.36.3070_peptide_LmxM.36.3070_VIVEPHMLHPGVFISK
LmxM.36.3950	1484663	1486099	+	1485347	1486099	1484906	1484953	+	LmxM.36.3950_peptide_LmxM.36.3950_NASGSVASSGGAASAK
LmxM.36.6480	2463720	2467646	-	2463720	2467562	2467542	2467562	-	LmxM.36.6480_peptide_LmxM.36.6480_MVQVVHR
LmxM.36.6730	2544544	2548626	-	2544544	2547051	2547559	2547603	-	LmxM.36.6730_peptide_LmxM.36.6730_EPLPYDAVLLEGVVR
LmxM.36.6730	2544544	2548626	-	2544544	2547051	2547235	2547312	-	LmxM.36.6730_peptide_LmxM.36.6730_KVDLAALPPAELPEVEDTEAAQEAER
LmxM.36.6730	2544544	2548626	-	2544544	2547051	2547328	2547381	-	LmxM.36.6730_peptide_LmxM.36.6730_LPDHLSSEYDMPAKPEPK
LmxM.36.6730	2544544	2548626	-	2544544	2547051	2547559	2547612	-	LmxM.36.6730_peptide_LmxM.36.6730_NAREPLPYDAVLLEGVVR
LmxM.36.6730	2544544	2548626	-	2544544	2547051	2548156	2548224	-	LmxM.36.6730_peptide_LmxM.36.6730_YAAQLLTDRNAAVQATLNDMMER
LmxM.36.6730	2544544	2548626	-	2544544	2547051	2547526	2547558	-	LmxM.36.6730_peptide_LmxM.36.6730_SVDAYKTLAQR
LmxM.36.6730	2544544	2548626	-	2544544	2547051	2548198	2548224	-	LmxM.36.6730_peptide_LmxM.36.6730_YAAQLLTDR
LmxM.36.6730	2544544	2548626	-	2544544	2547051	2548156	2548197	-	LmxM.36.6730_peptide_LmxM.36.6730_NAAVQATLNDMMER
LmxM.36.6730	2544544	2548626	-	2544544	2547051	2548021	2548062	-	LmxM.36.6730_peptide_LmxM.36.6730_RLSSVDDGAVSAVR
LmxM.36.6730	2544544	2548626	-	2544544	2547051	2548582	2548623	-	LmxM.36.6730_peptide_LmxM.36.6730_SVEDDYRASIAQAR
LmxM.36.6730	2544544	2548626	-	2544544	2547051	2547700	2547774	-	LmxM.36.6730_peptide_LmxM.36.6730_ALQAASPDAMEKEEEGADEWAELGR
LmxM.36.6730	2544544	2548626	-	2544544	2547051	2547493	2547525	-	LmxM.36.6730_peptide_LmxM.36.6730_LSNQLLHPHLK
