# Supplementary material for: Comparative Life Cycle Transcriptomics Revises Leishmania mexicana Genome Annotation and Links a Chromosome Duplication with Parasitism of Vertebrates
Source: PLoS Pathog. 2015 Oct 9;11(10):e1005186. doi: 10.1371/journal.ppat.1005186 (PMC4599935; doi:10.1371/journal.ppat.1005186)
Supplement: S13 Table — (XLSX) [file ppat.1005186.s017.xlsx]

## Sheet: Pearsons_correlation_coefficien
Table S13. Pearson correlation coefficients. Calculated from log10 FPKM values of L. mexicana reads only.
	AMA1	AMA2	AMA3	AXA1	AXA2	AXA3	PRO1	PRO2	PRO3
AMA1	1	0.902538	0.920626	0.934565	0.869052	0.861449	0.798165	0.705915	0.759676
AMA2	0.902538	1	0.976744	0.911346	0.911139	0.91591	0.784687	0.785112	0.810997
AMA3	0.920626	0.976744	1	0.934553	0.934178	0.93103	0.813805	0.795731	0.828825
AXA1	0.934565	0.911346	0.934553	1	0.943335	0.927842	0.876618	0.779862	0.842434
AXA2	0.869052	0.911139	0.934178	0.943335	1	0.991126	0.91111	0.900643	0.931407
AXA3	0.861449	0.91591	0.93103	0.927842	0.991126	1	0.89394	0.906486	0.923102
PRO1	0.798165	0.784687	0.813805	0.876618	0.91111	0.89394	1	0.915071	0.963265
PRO2	0.705915	0.785112	0.795731	0.779862	0.900643	0.906486	0.915071	1	0.968849
PRO3	0.759676	0.810997	0.828825	0.842434	0.931407	0.923102	0.963265	0.968849	1
